# Supplementary material for: The Staudinger reaction with 2-imino-1,3-thiaselenanes toward the synthesis of C4 spiro-β-lactams
Source: Royal Society of Chemistry journal article supplement (doi:10.1039/c3ob00073g), 2013-01-01

## Supporting Information

# The Staudinger reaction with 2-imino-1,3-thiaselenanes toward the synthesis of C4 spiro- $\beta$ -lactams

Yosuke Toyoda,<sup>a,c</sup> Masayuki Ninomiya,<sup>b</sup> Masahiro Ebihara<sup>a</sup> and Mamoru Koketsu\*<sup>b</sup>

<sup>a</sup> *Department of Chemistry,*

<sup>b</sup> *Department of Materials Science and Technology, Faculty of Engineering, Gifu University,  
Yanagido 1-1, Gifu, 501-1193, JAPAN. Fax: (+81) 58-293-2619; E-mail: [koketsu@gifu-u.ac.jp](mailto:koketsu@gifu-u.ac.jp)*

<sup>c</sup> *Present address: Department of Pharmacology, Kyoto University Graduate School of Medicine*

### Table of contents

|                                                                                 |                |
|---------------------------------------------------------------------------------|----------------|
| <sup>1</sup> H and <sup>13</sup> C NMR of Compounds <b>1~4</b> .....            | <b>S2~S15</b>  |
| <sup>1</sup> H and <sup>13</sup> C NMR of Compounds <b>6</b> and <b>7</b> ..... | <b>S16~S48</b> |
| <sup>1</sup> H and <sup>13</sup> C NMR of Compounds <b>8</b> .....              | <b>S49~S70</b> |
| <sup>1</sup> H and <sup>13</sup> C NMR of Compounds <b>9</b> .....              | <b>S71~S78</b> |

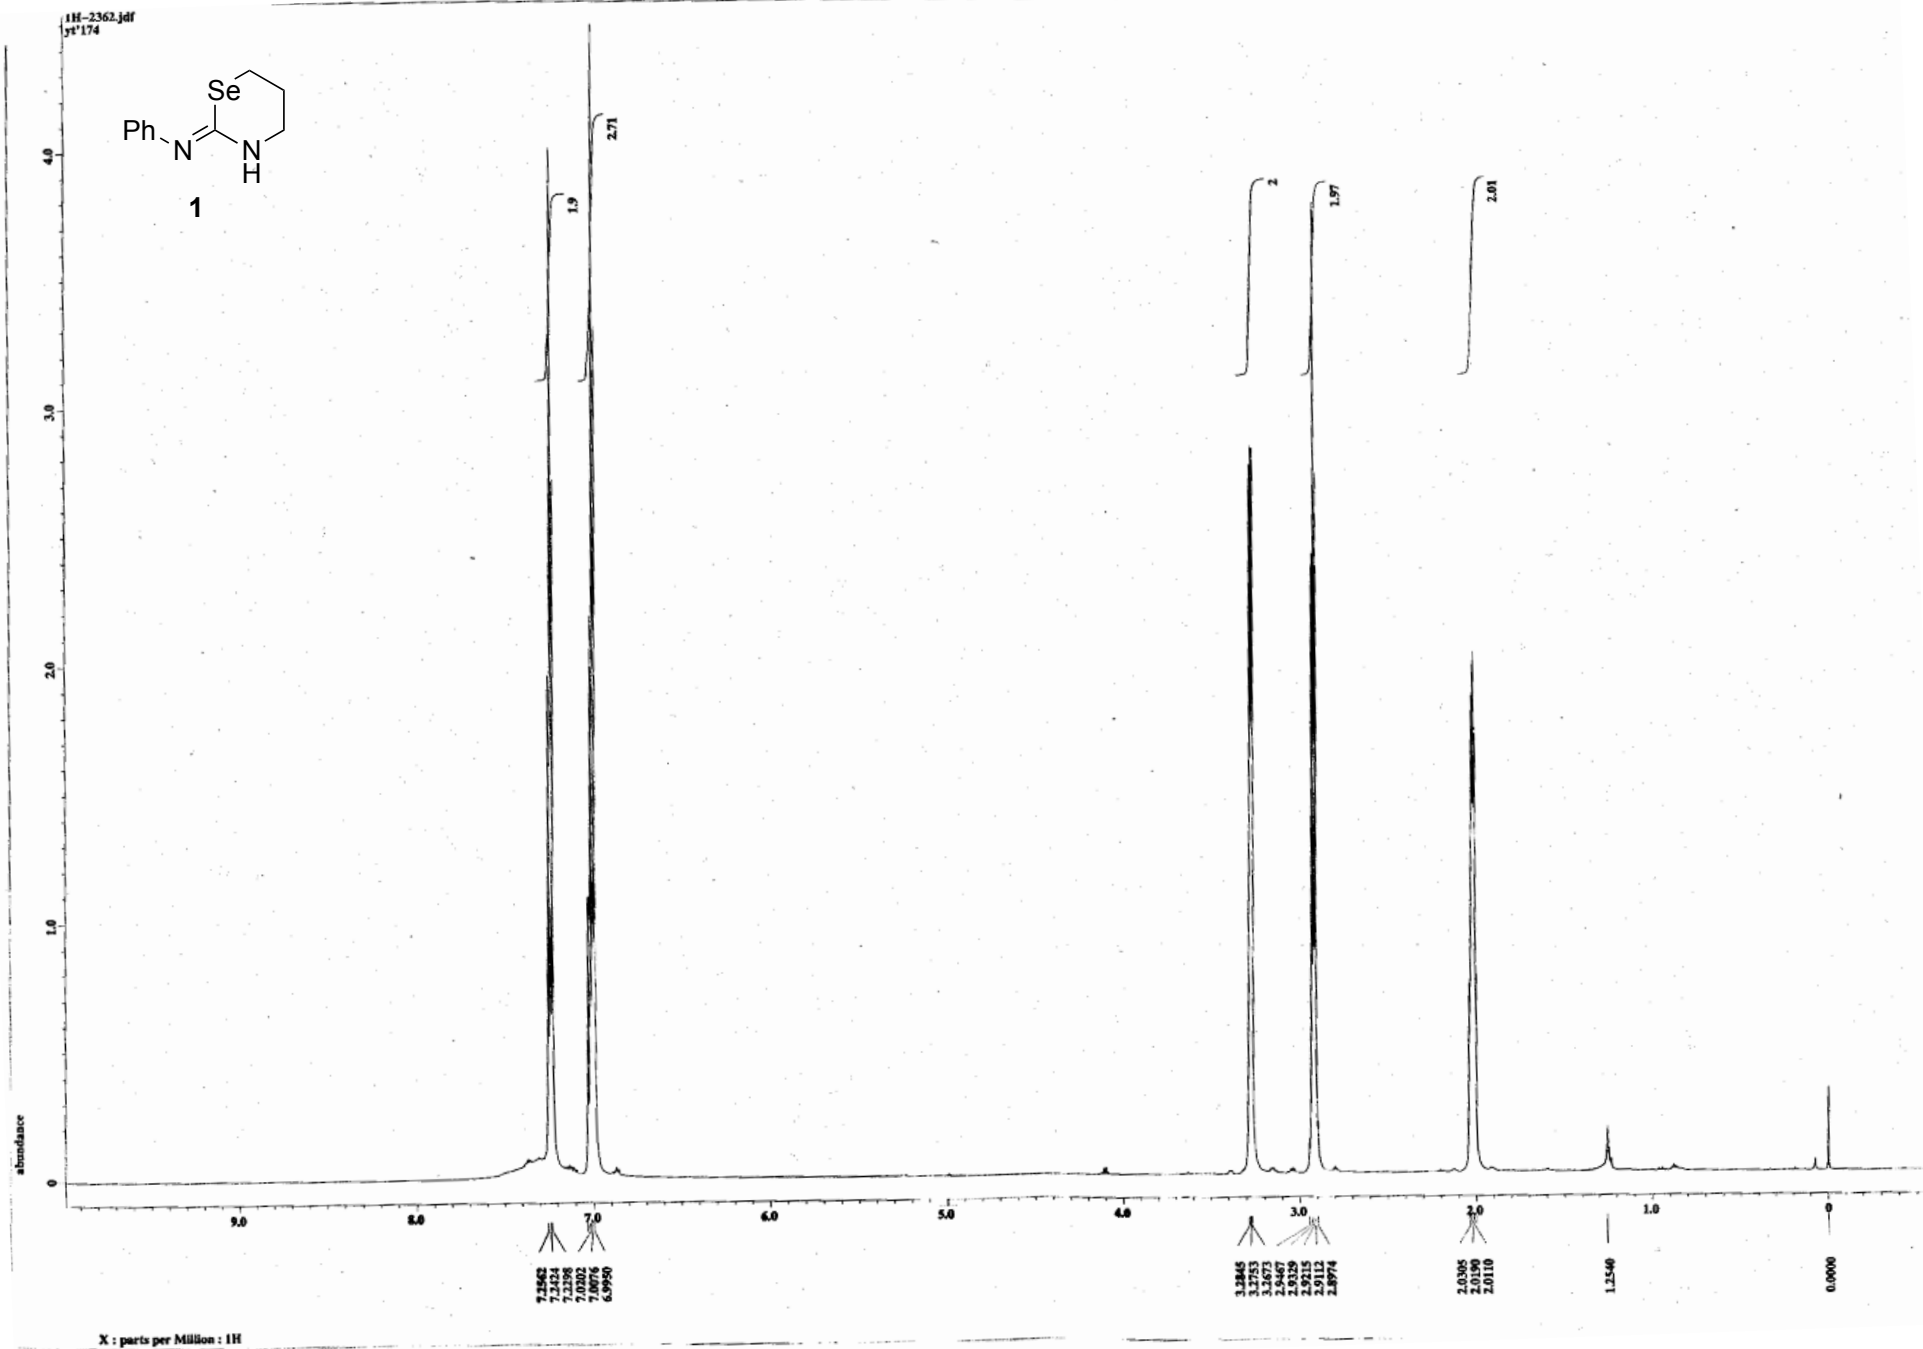

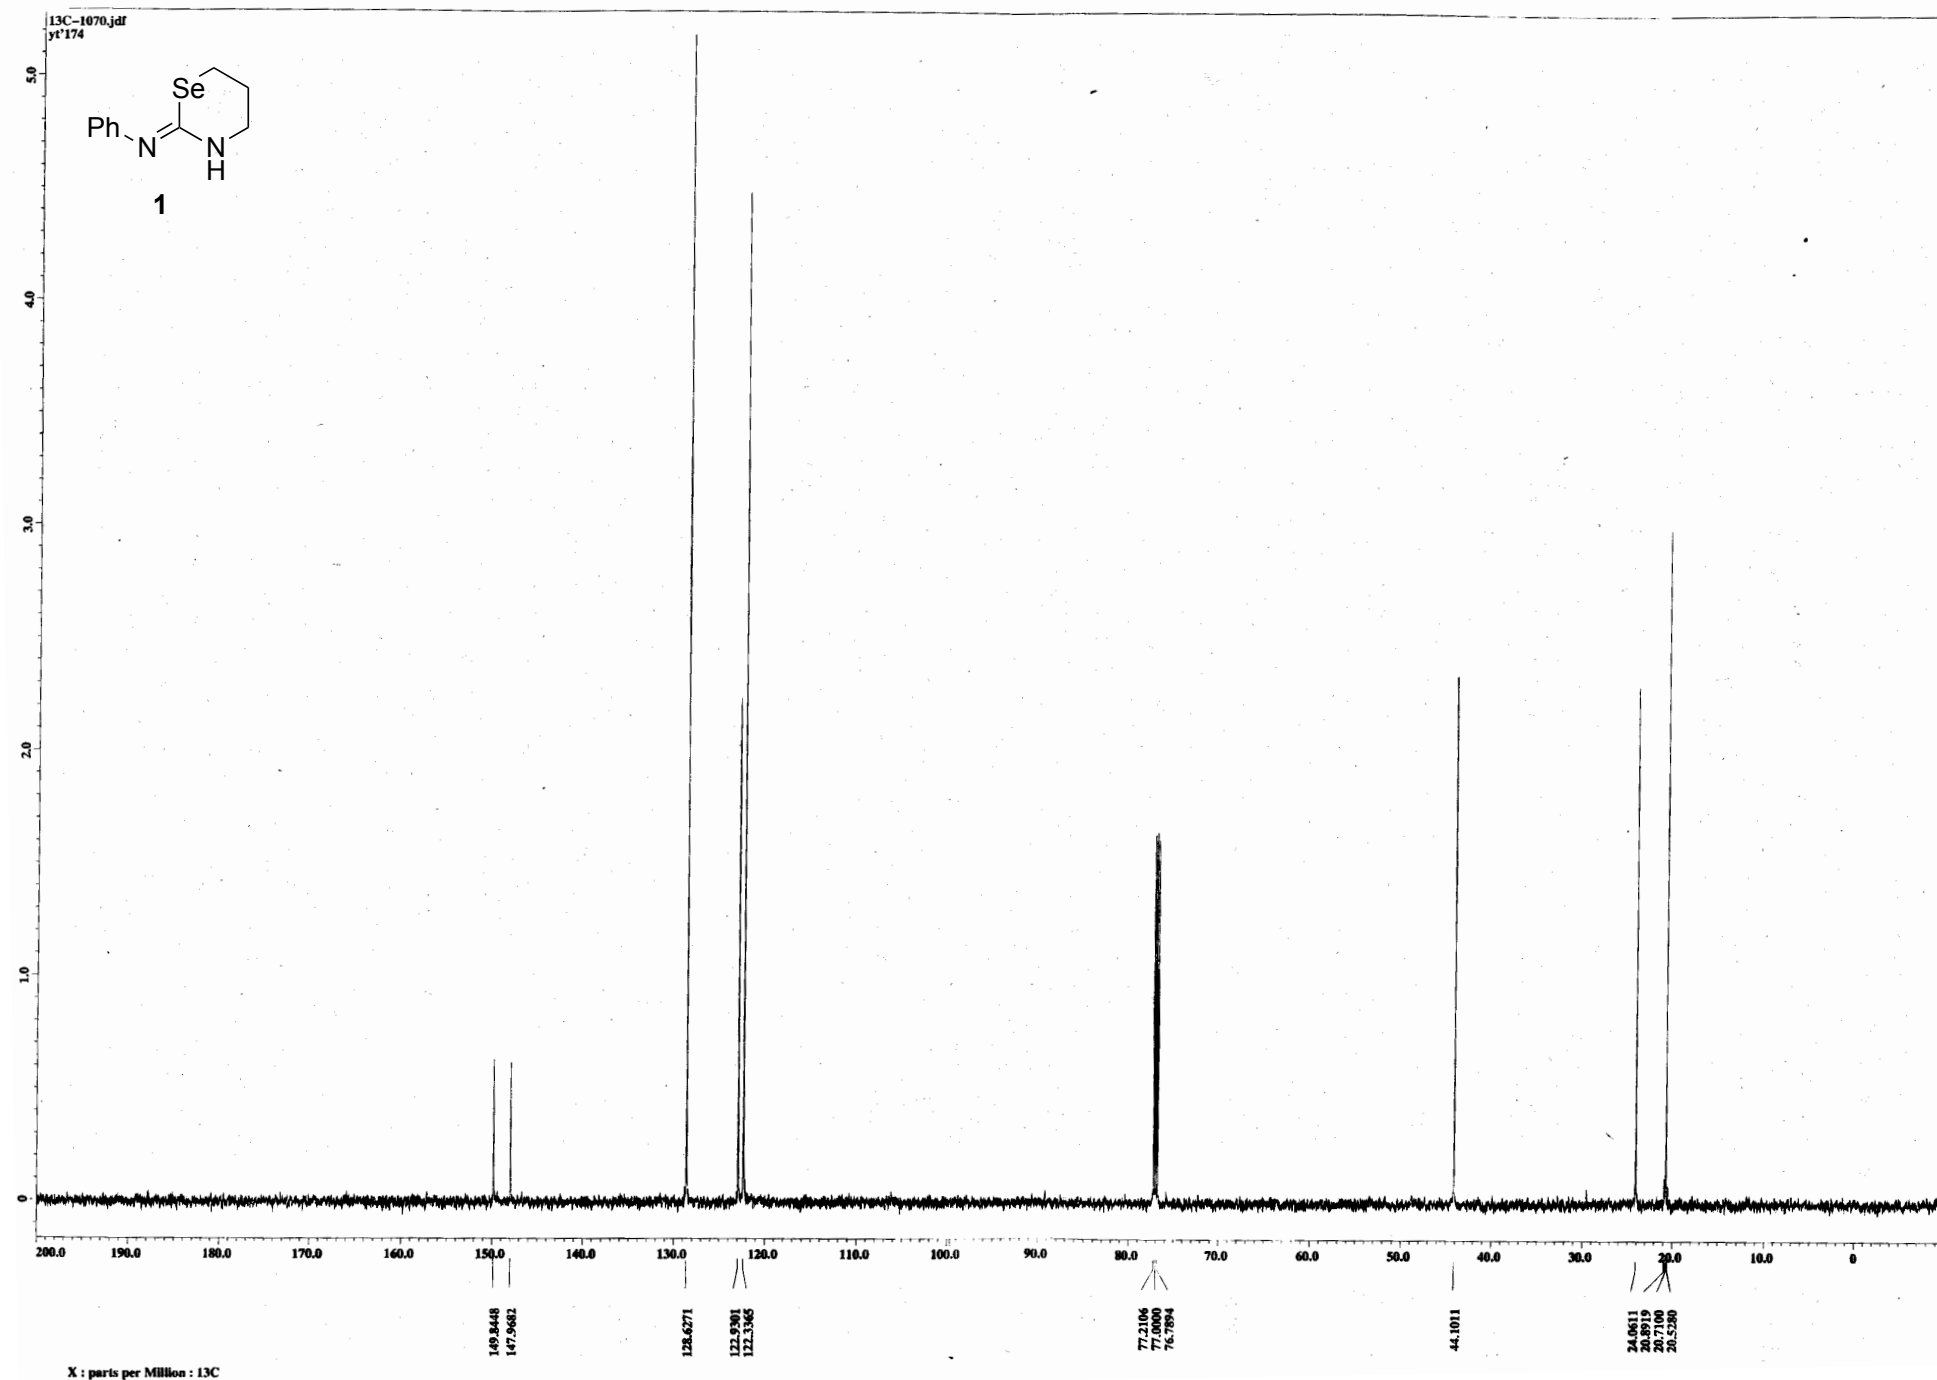

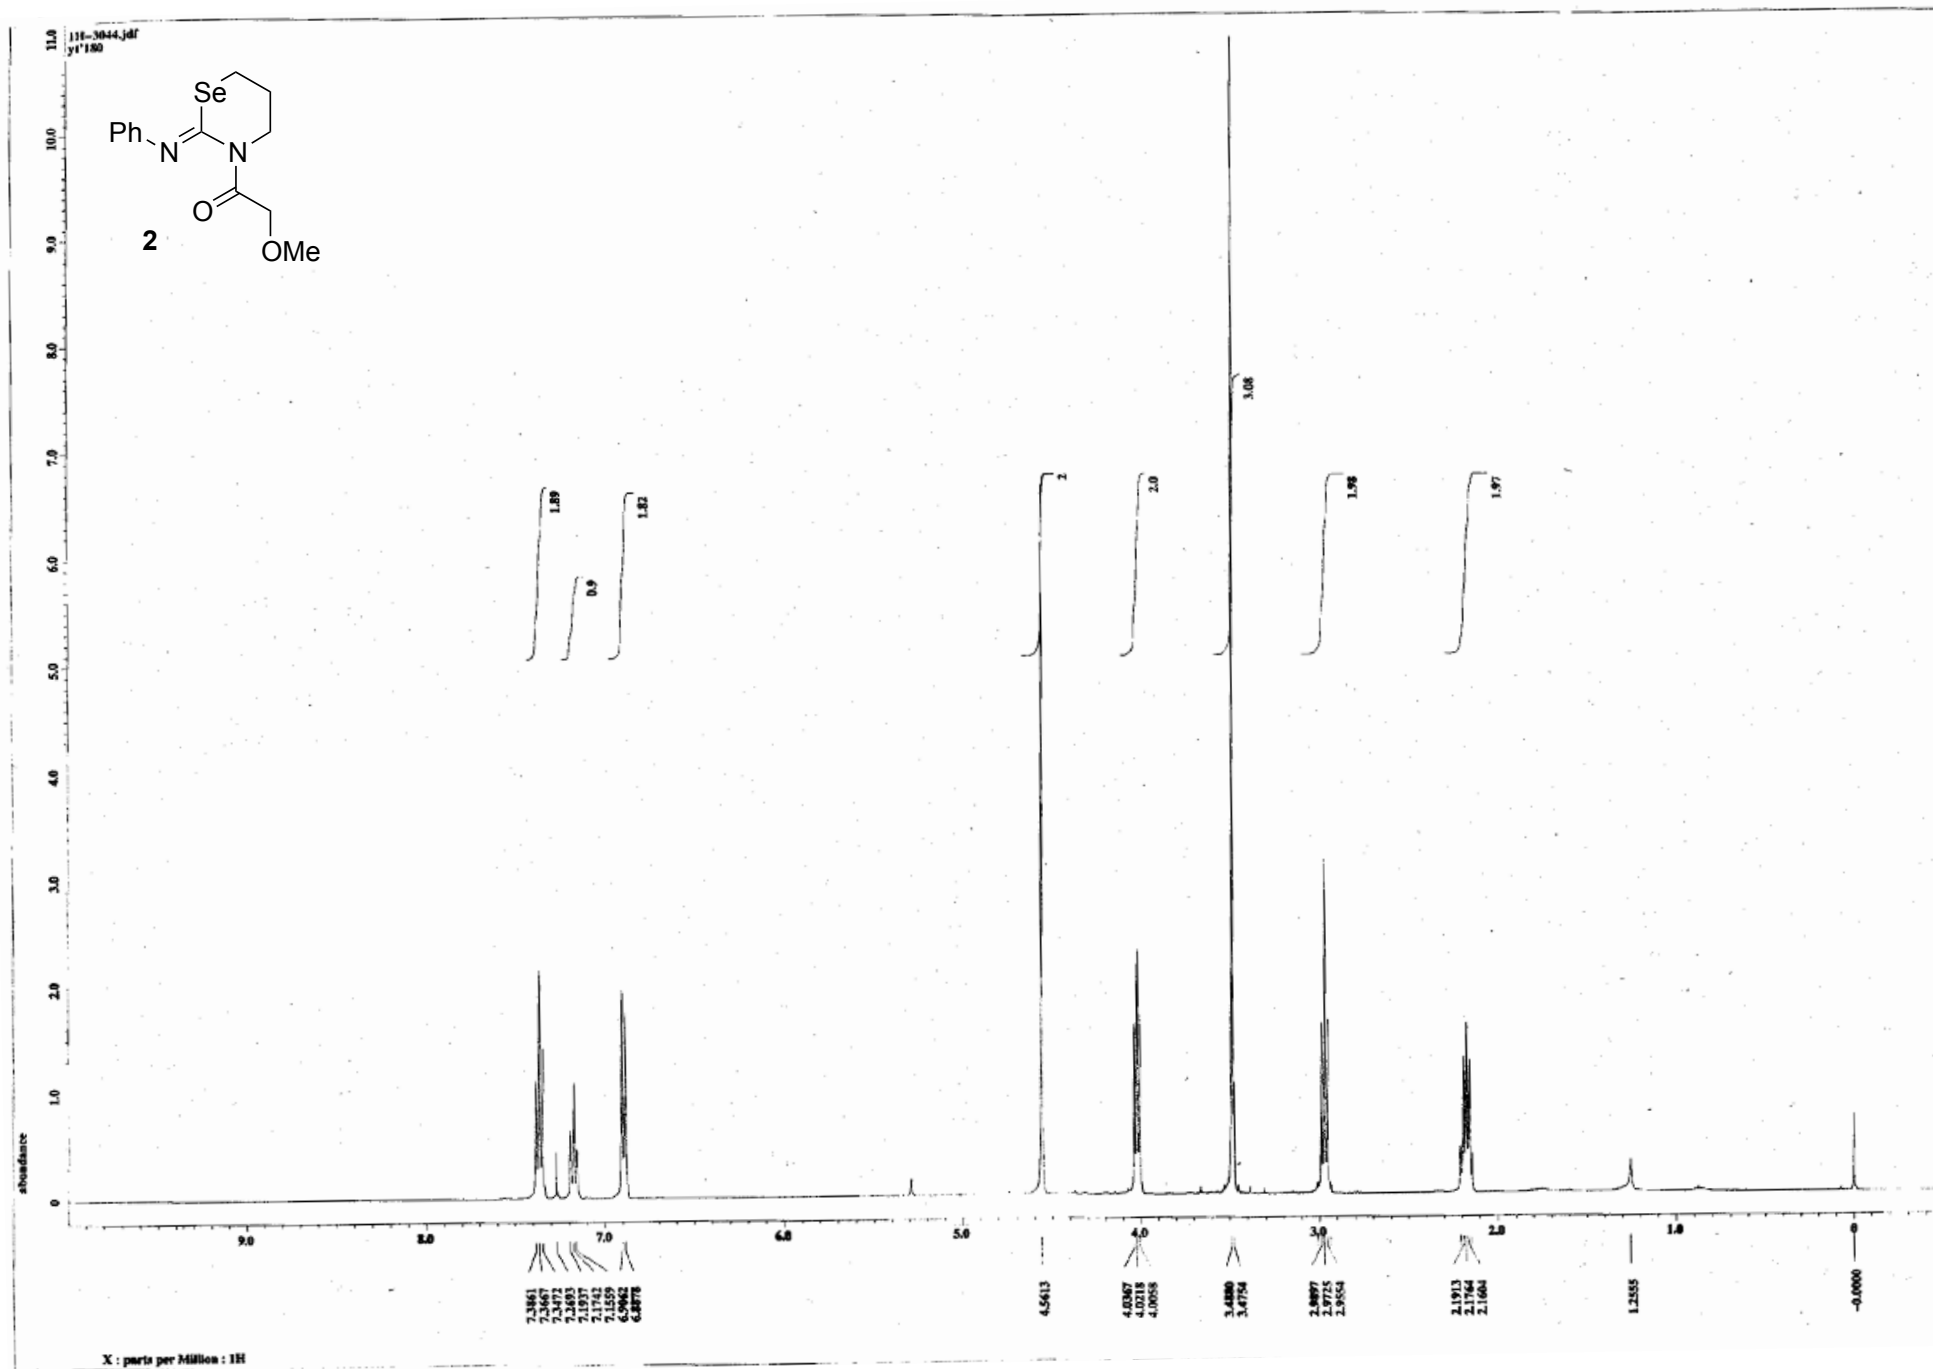



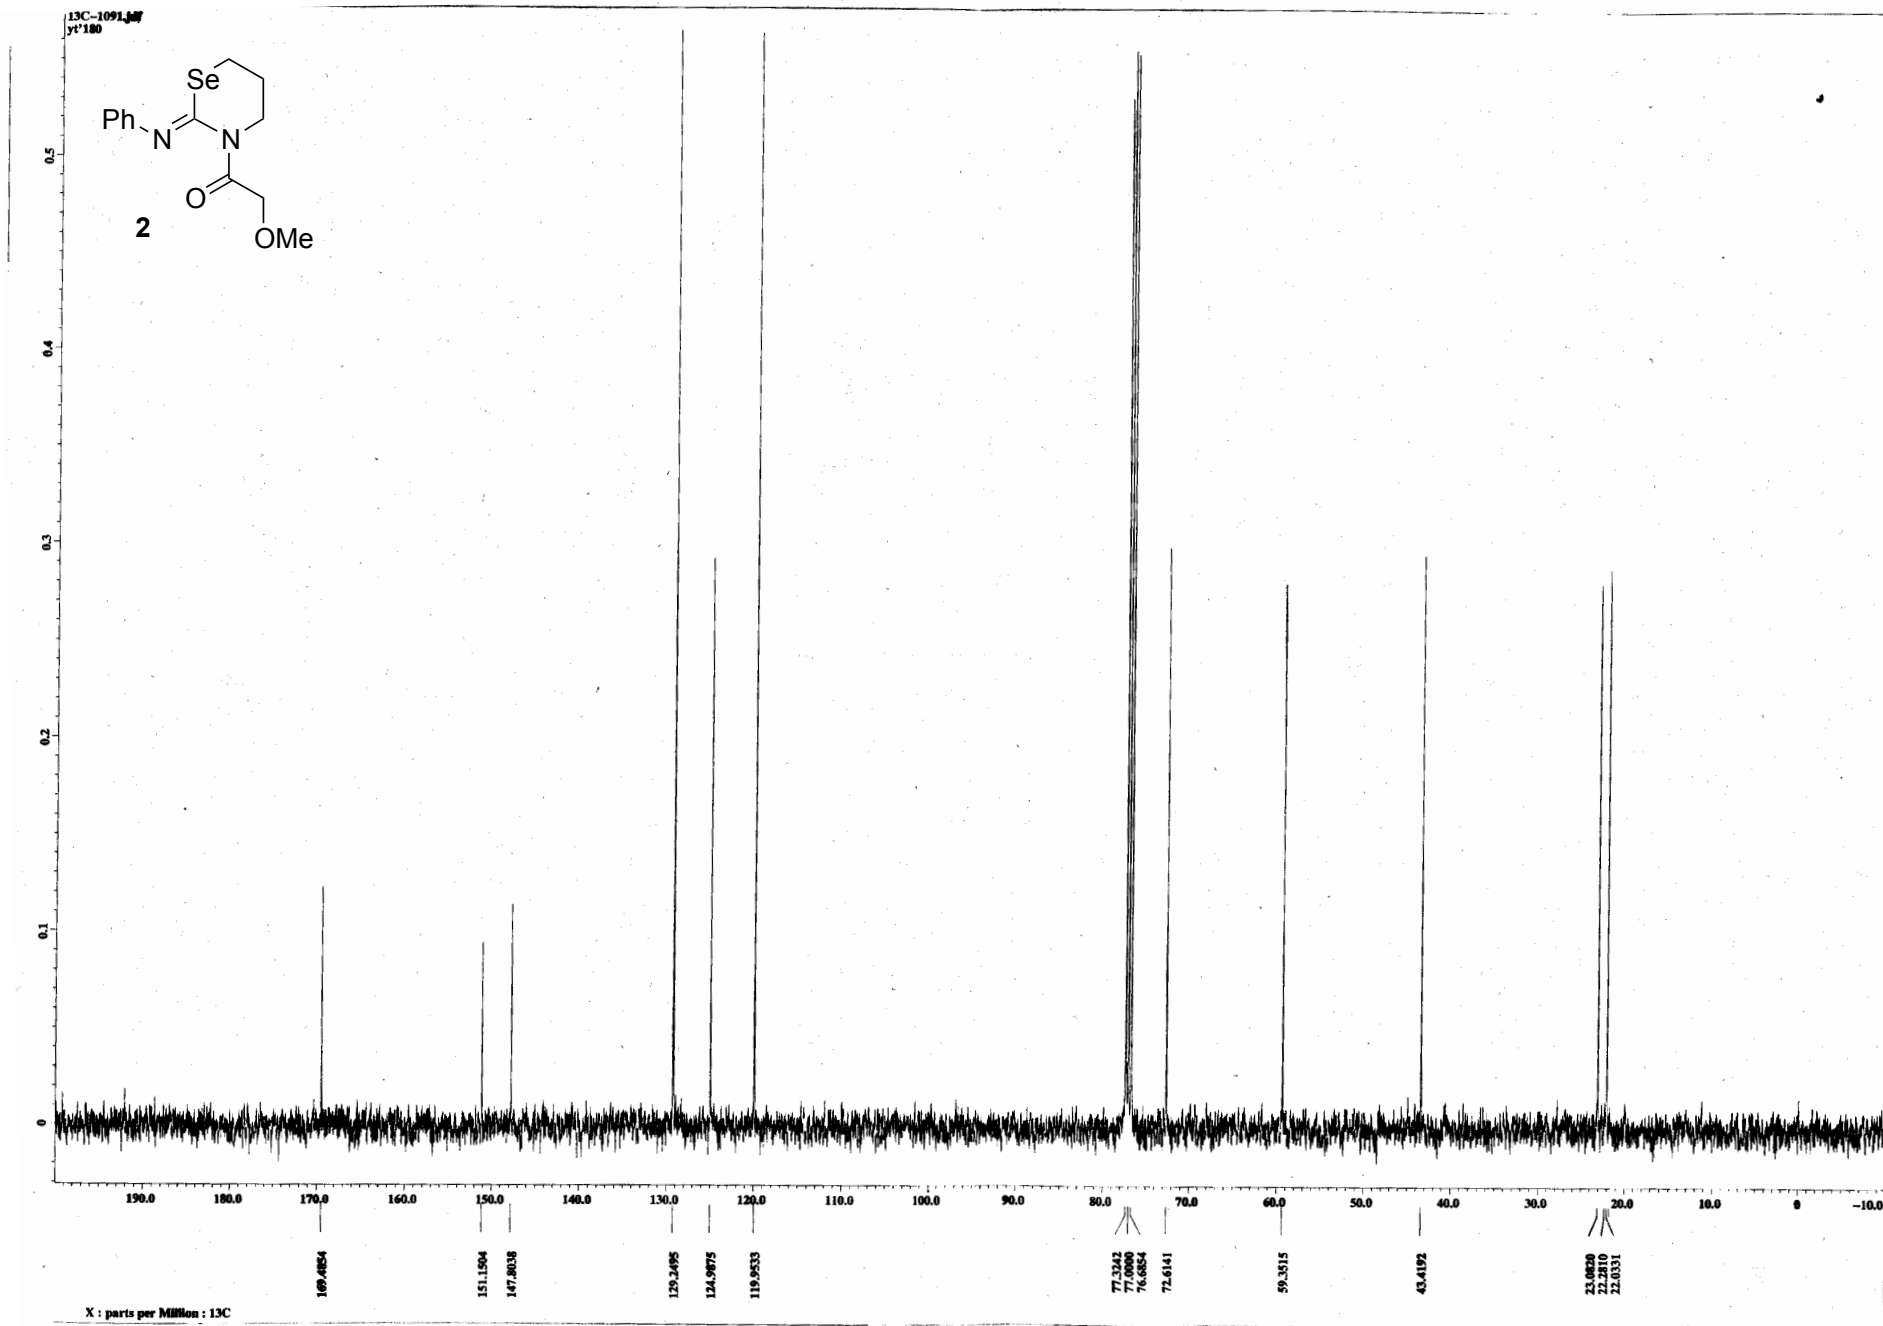



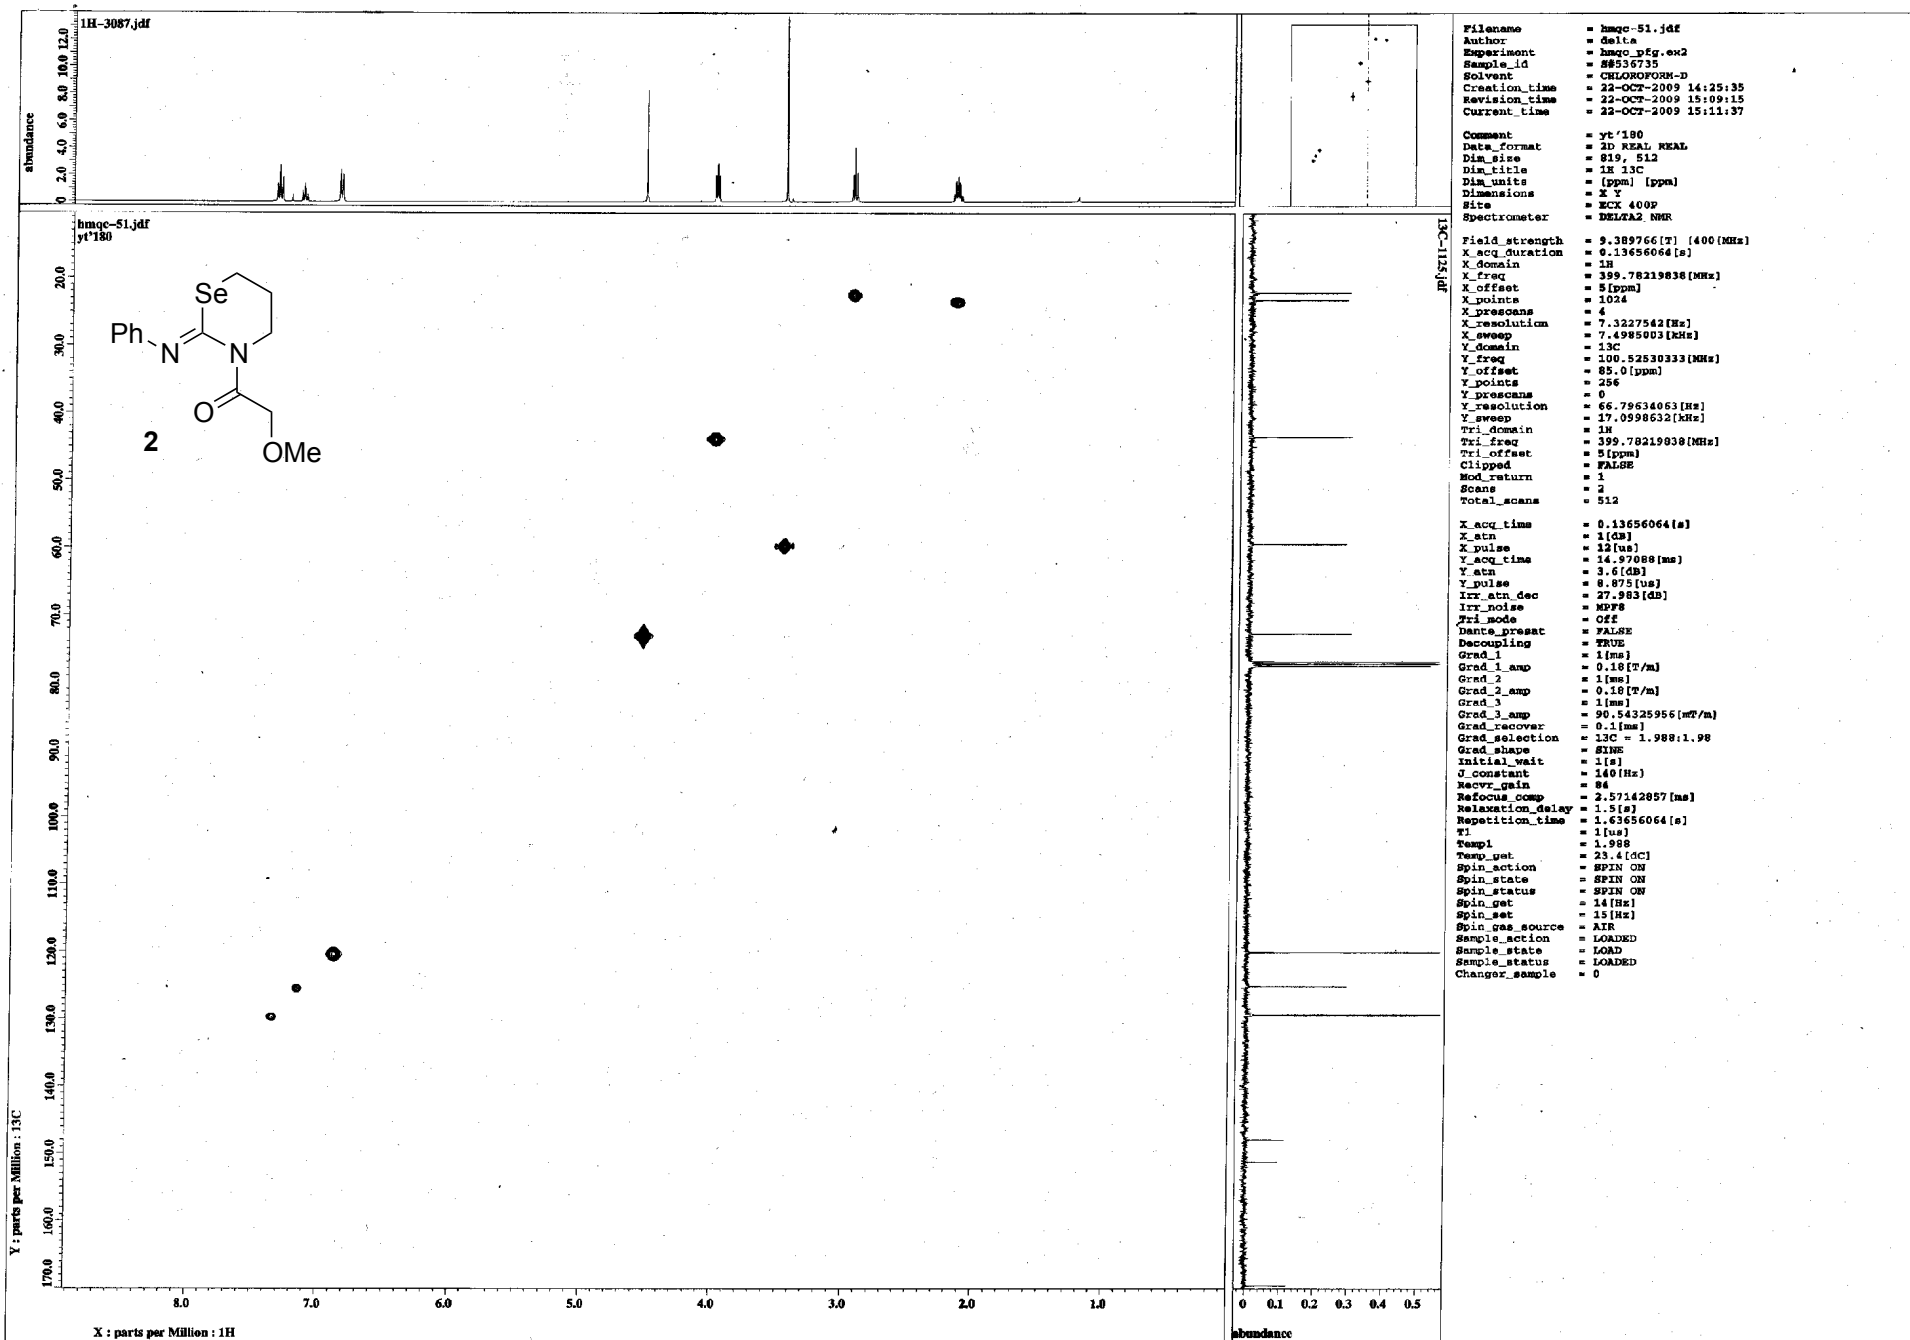

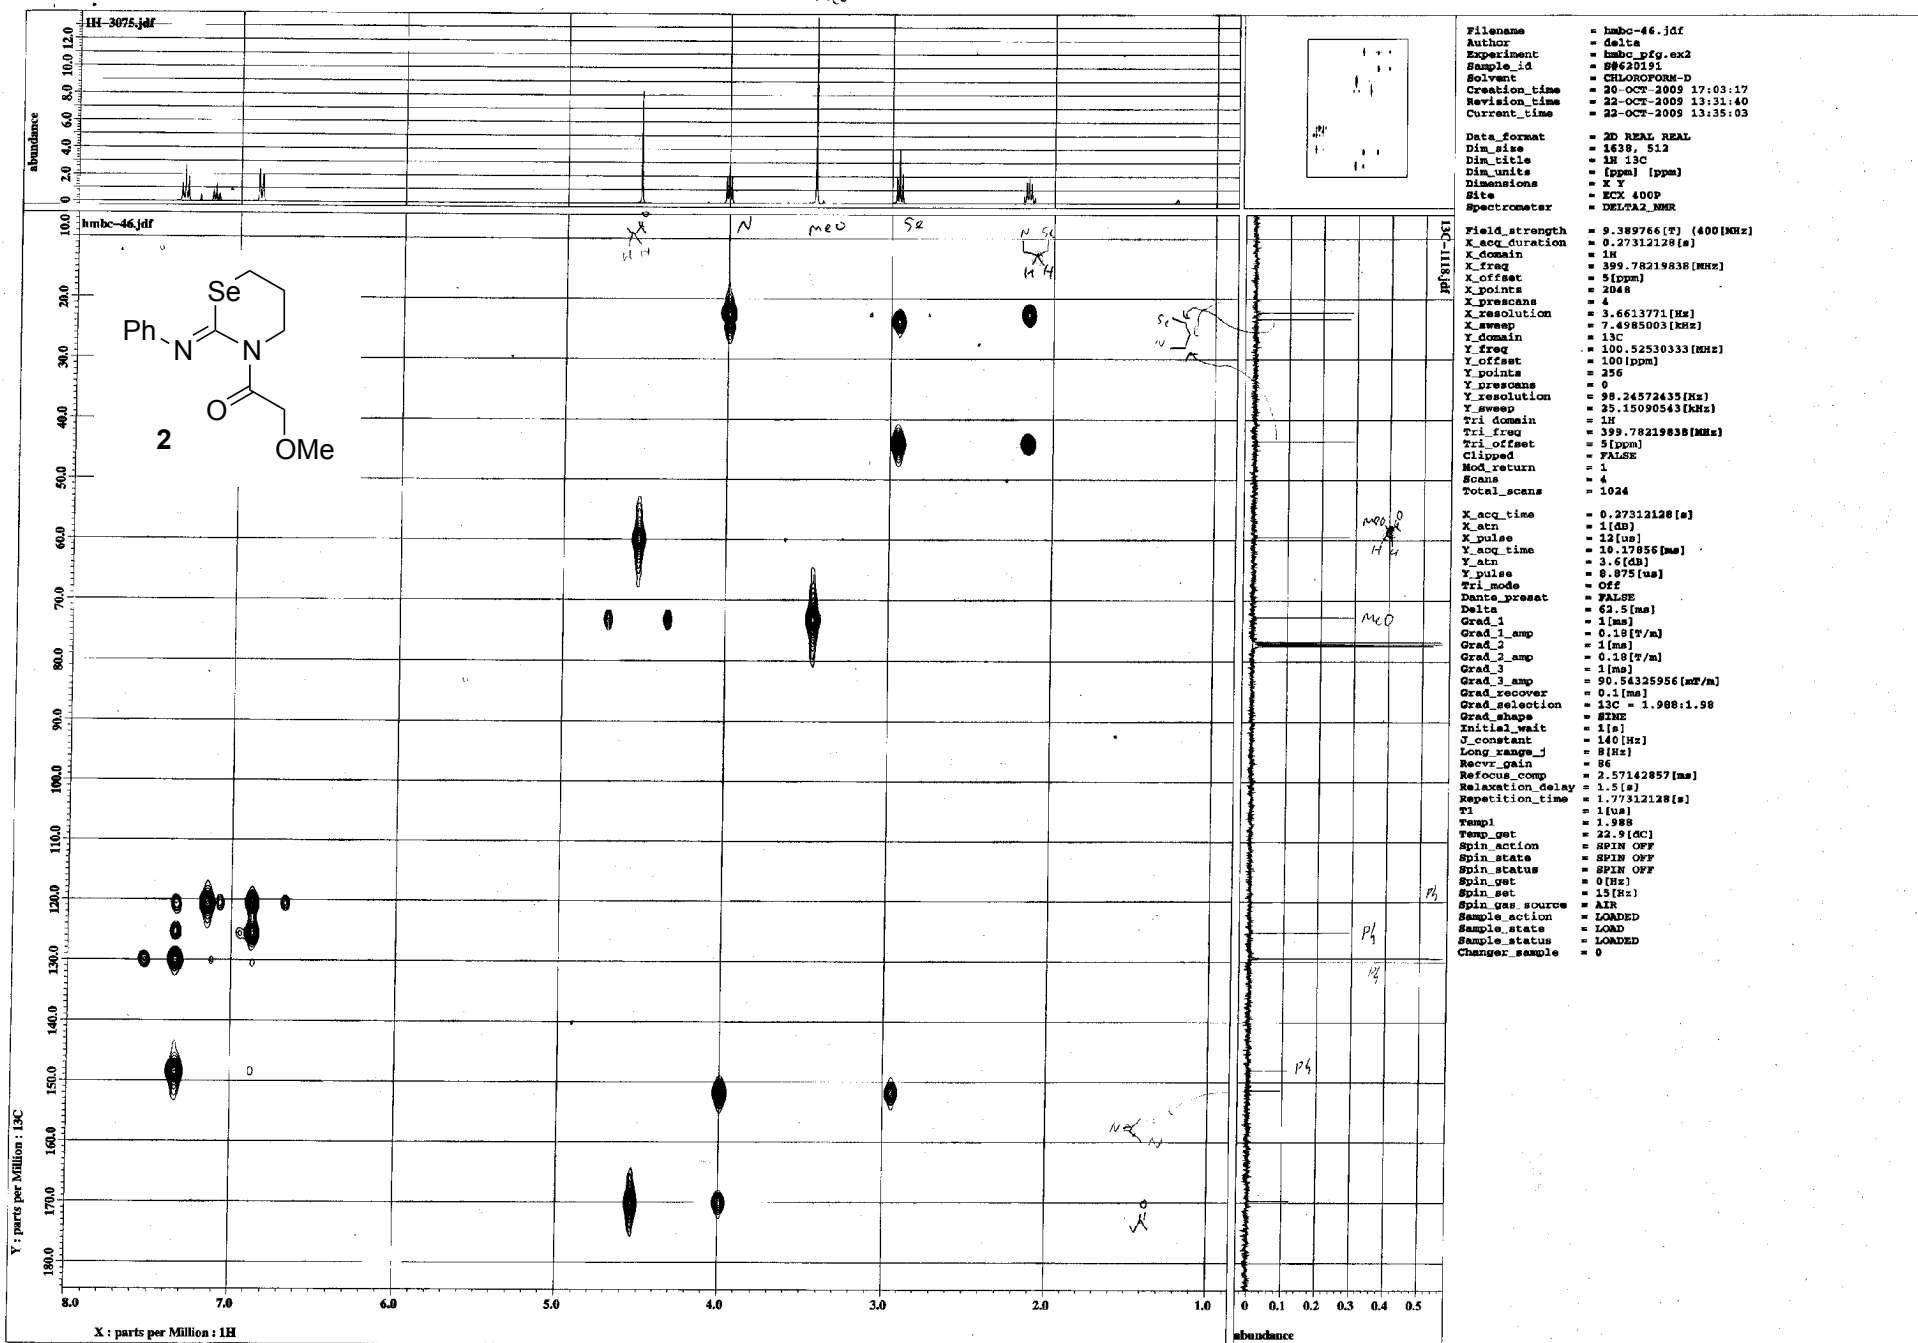

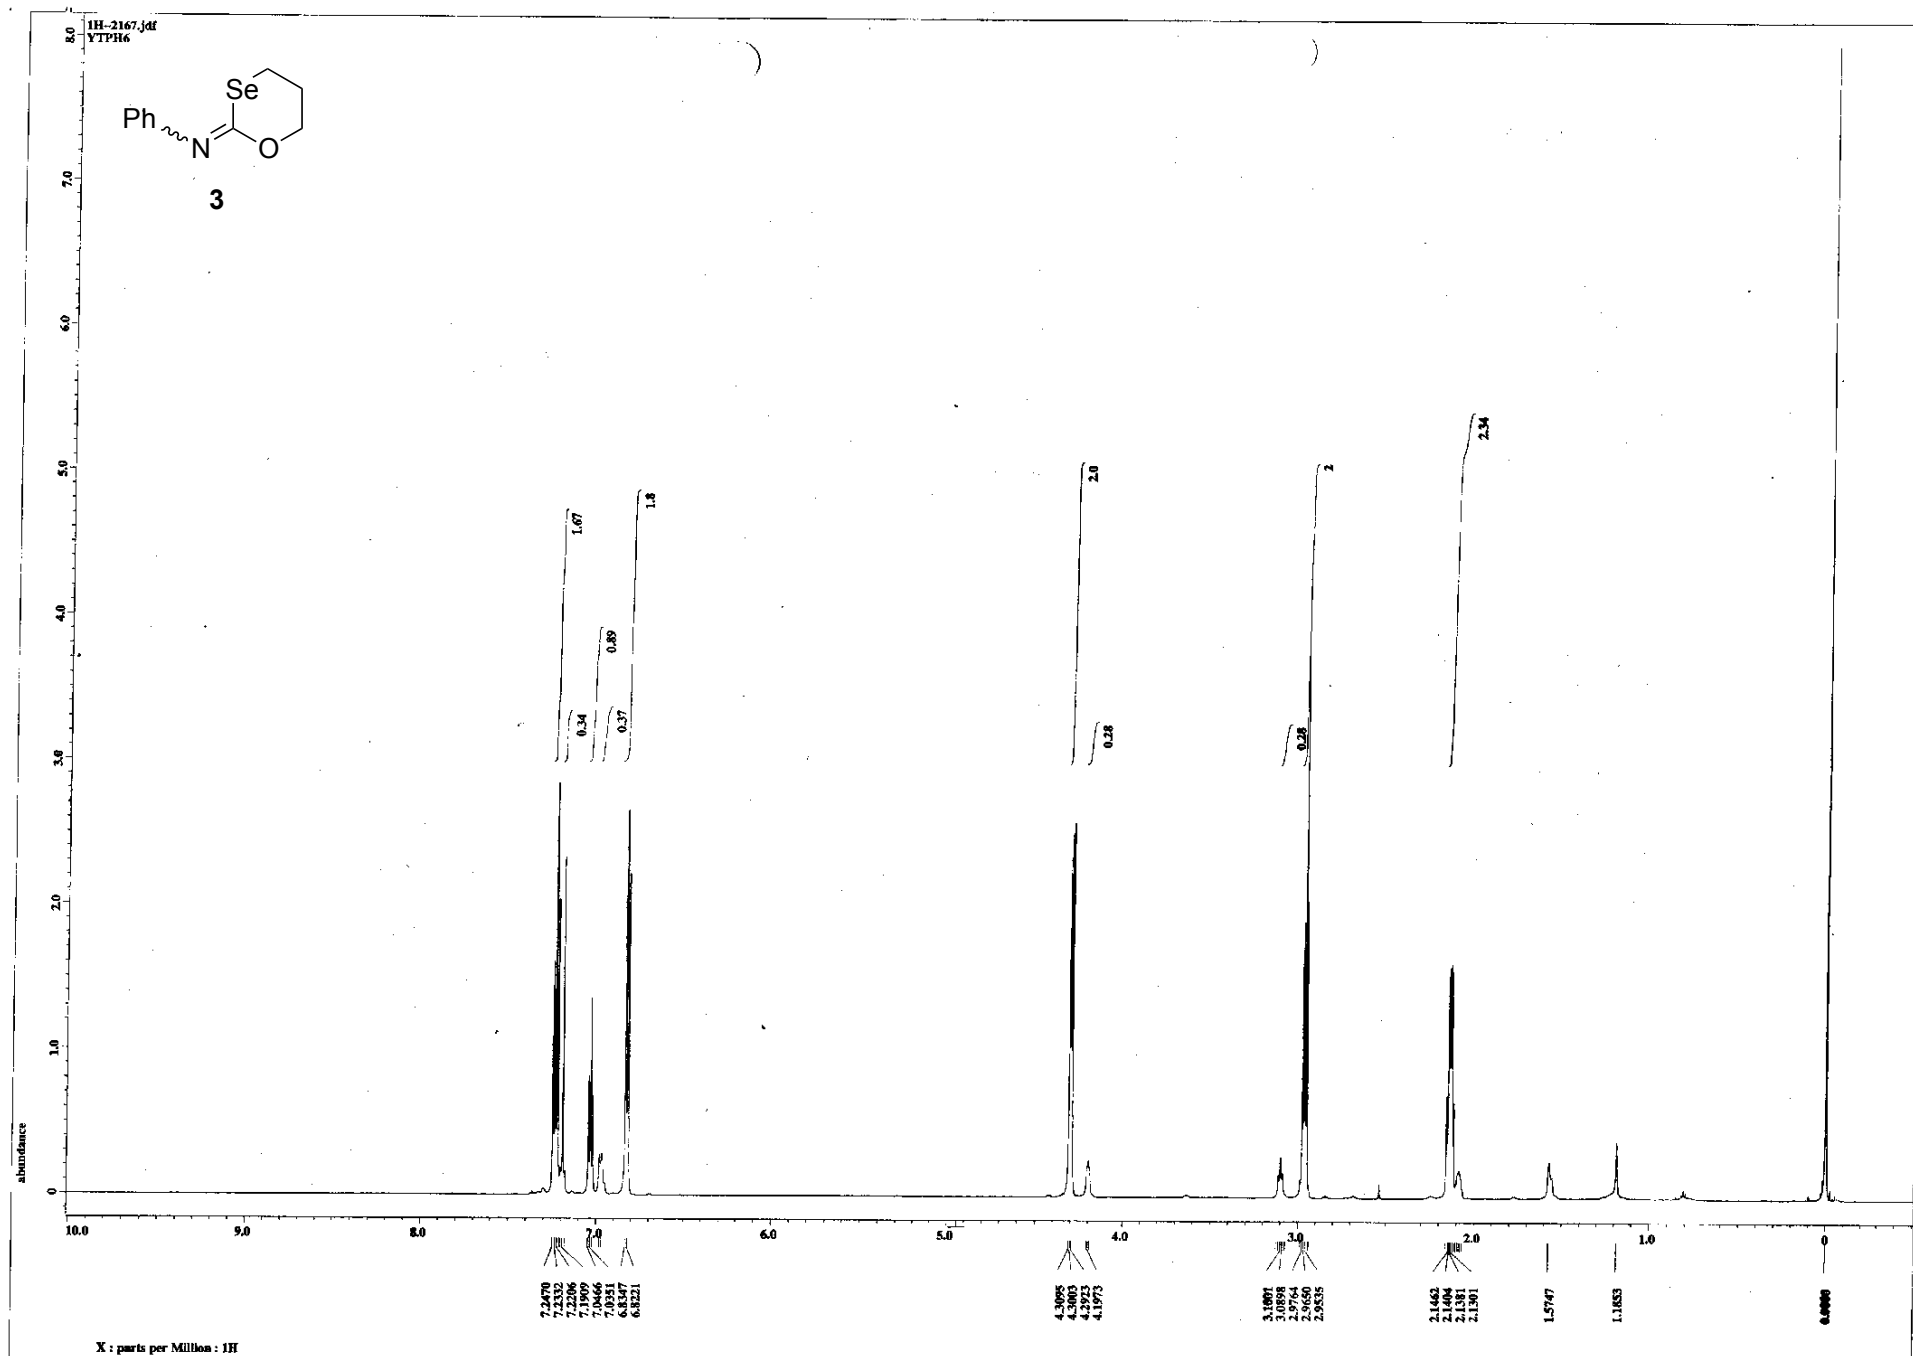

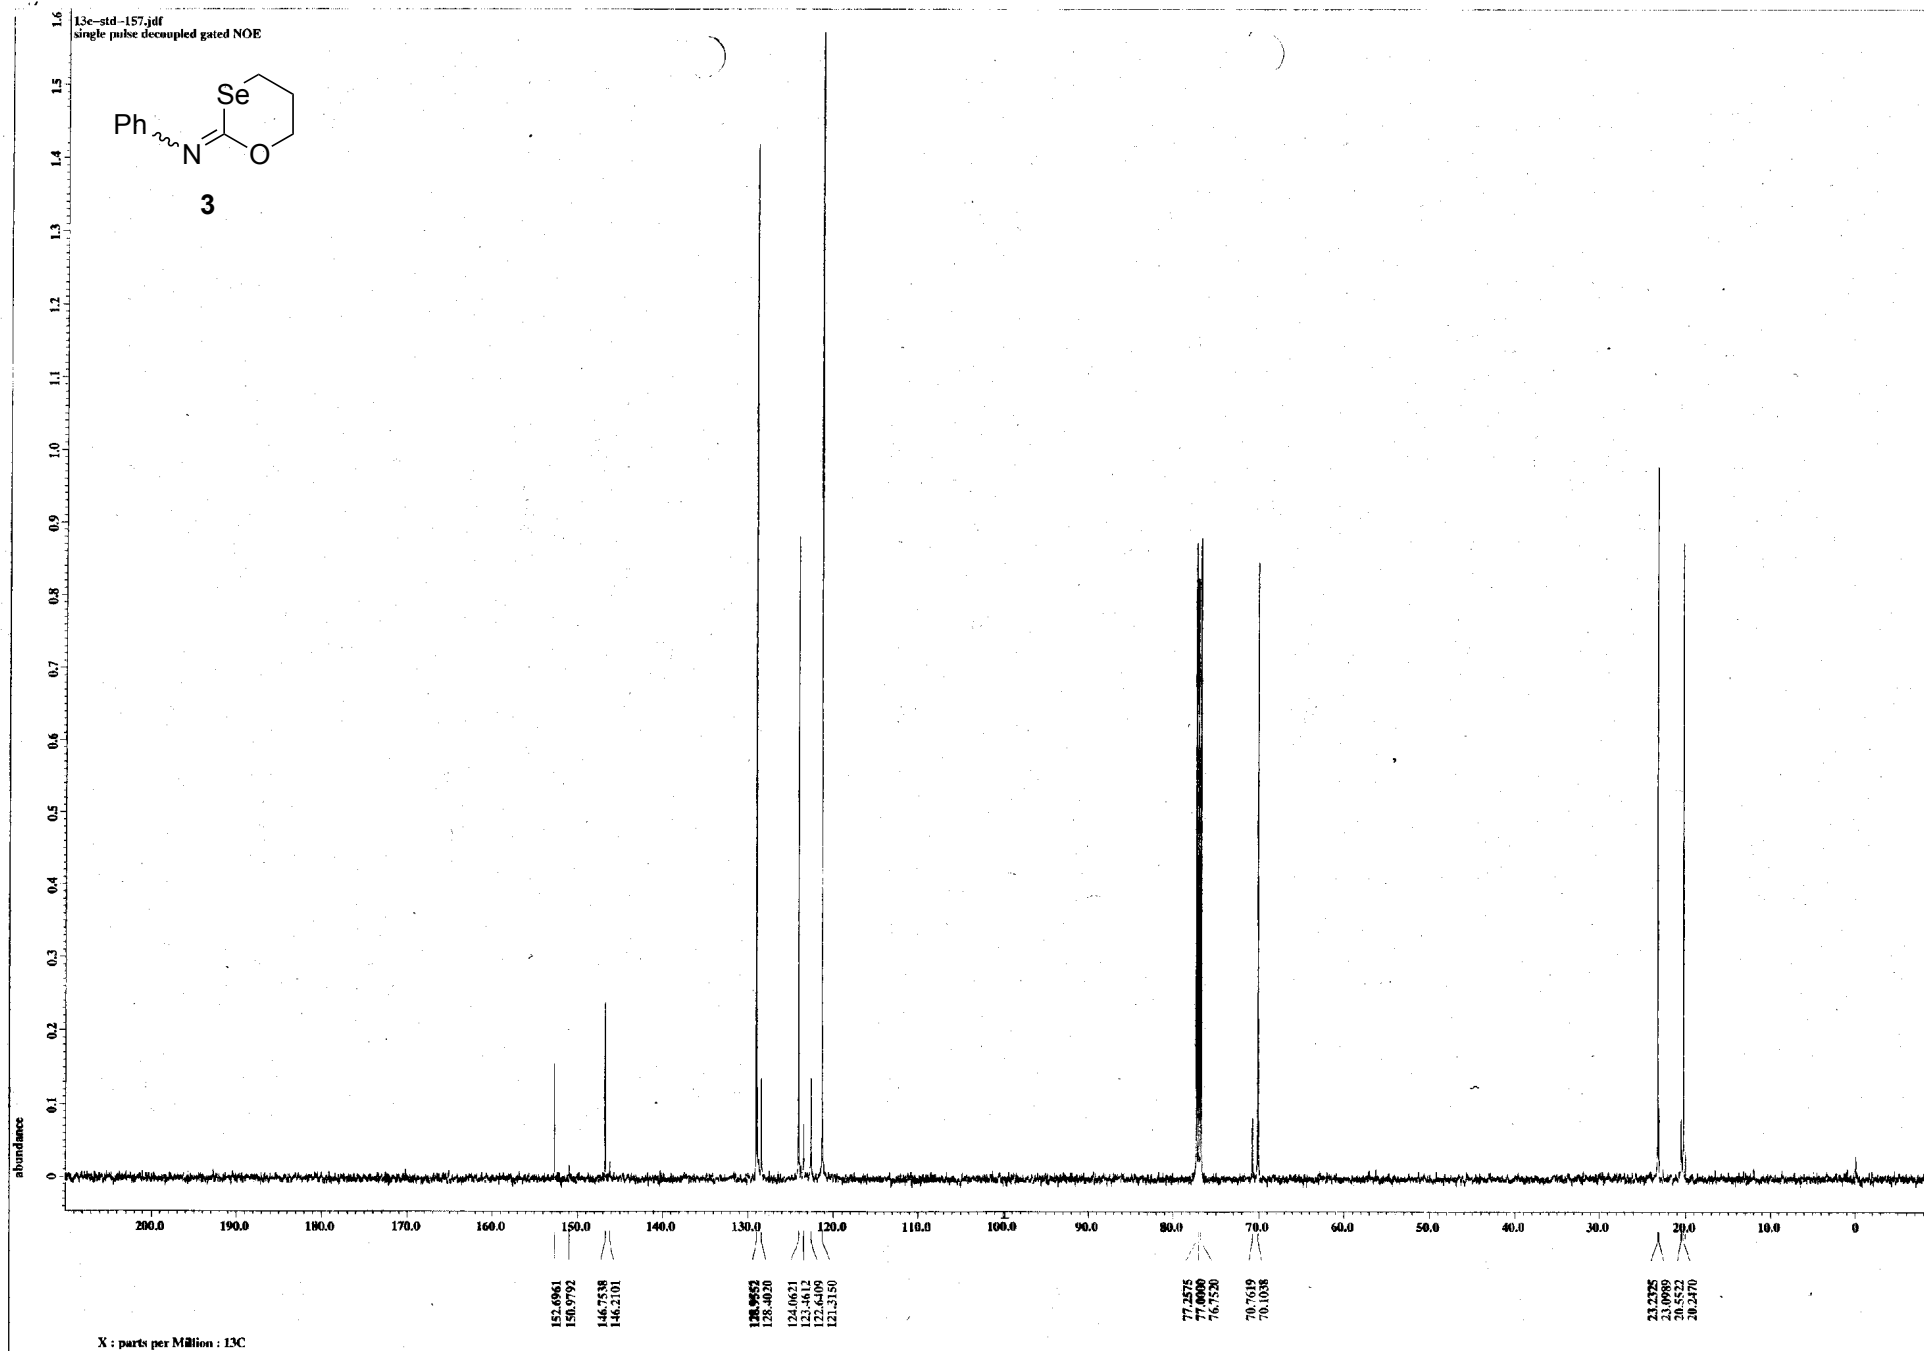

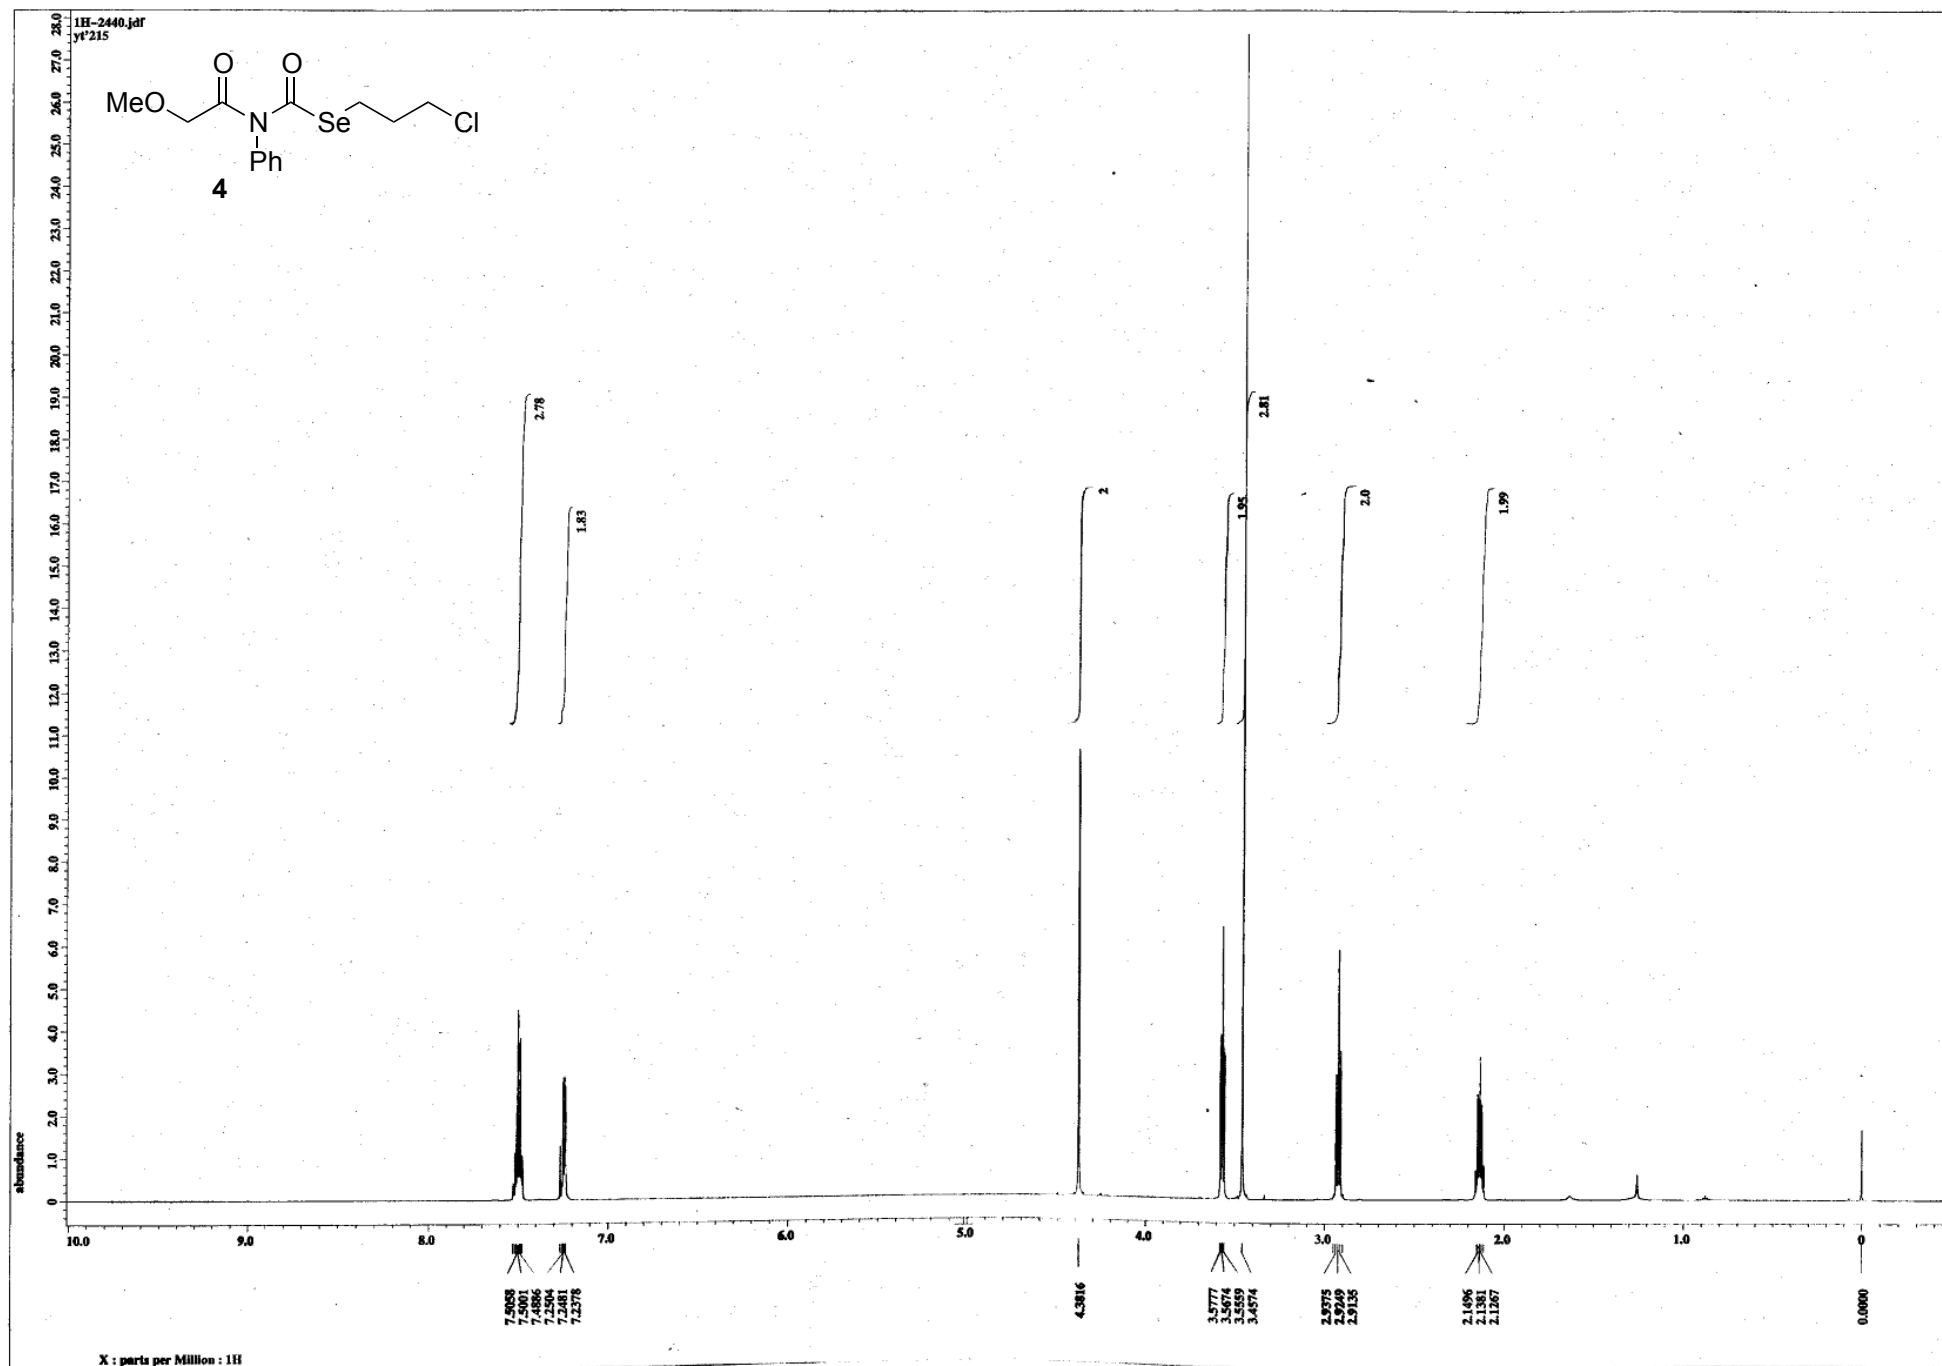

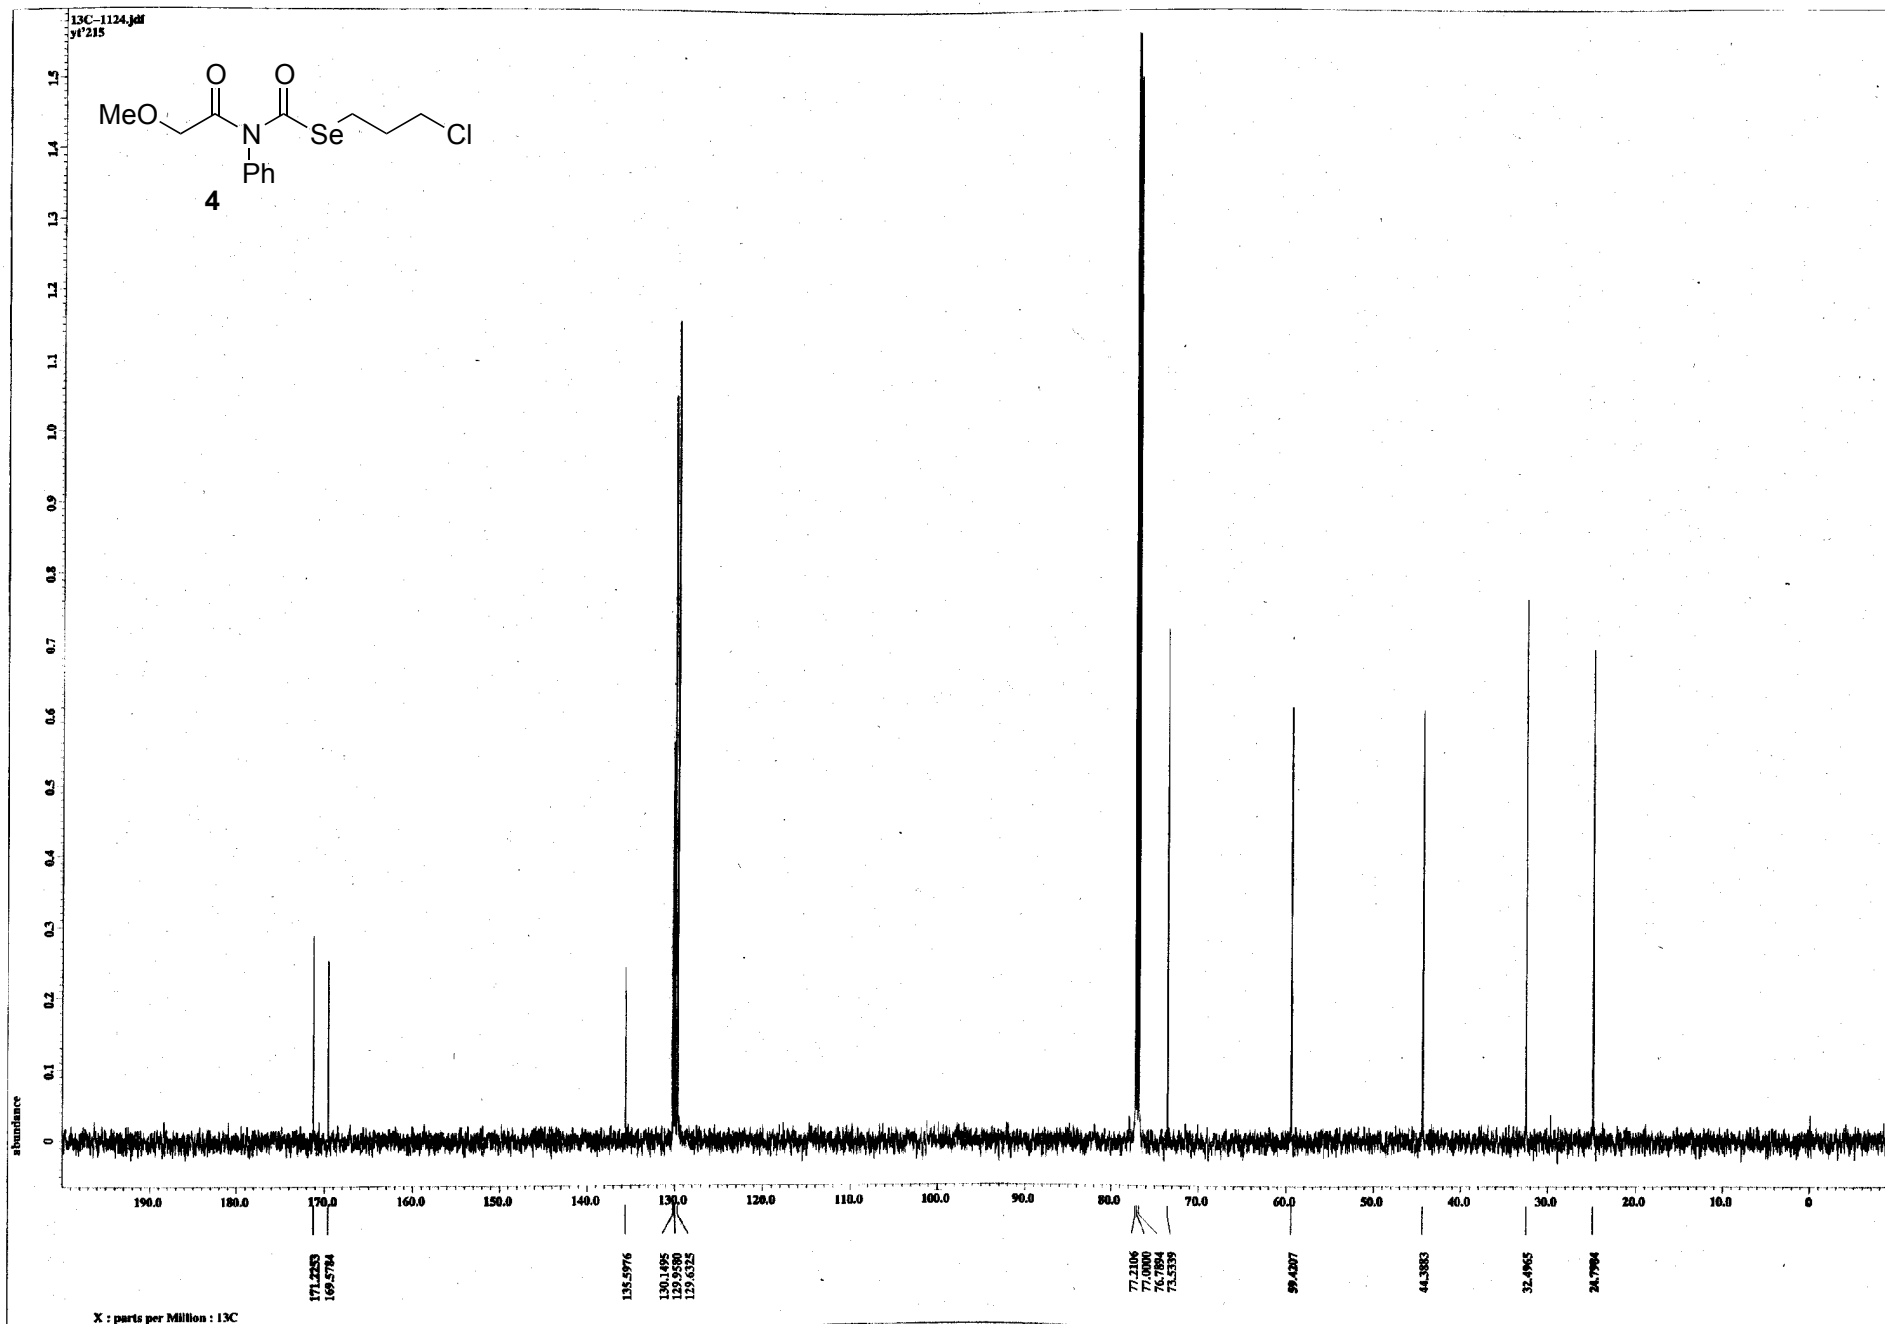



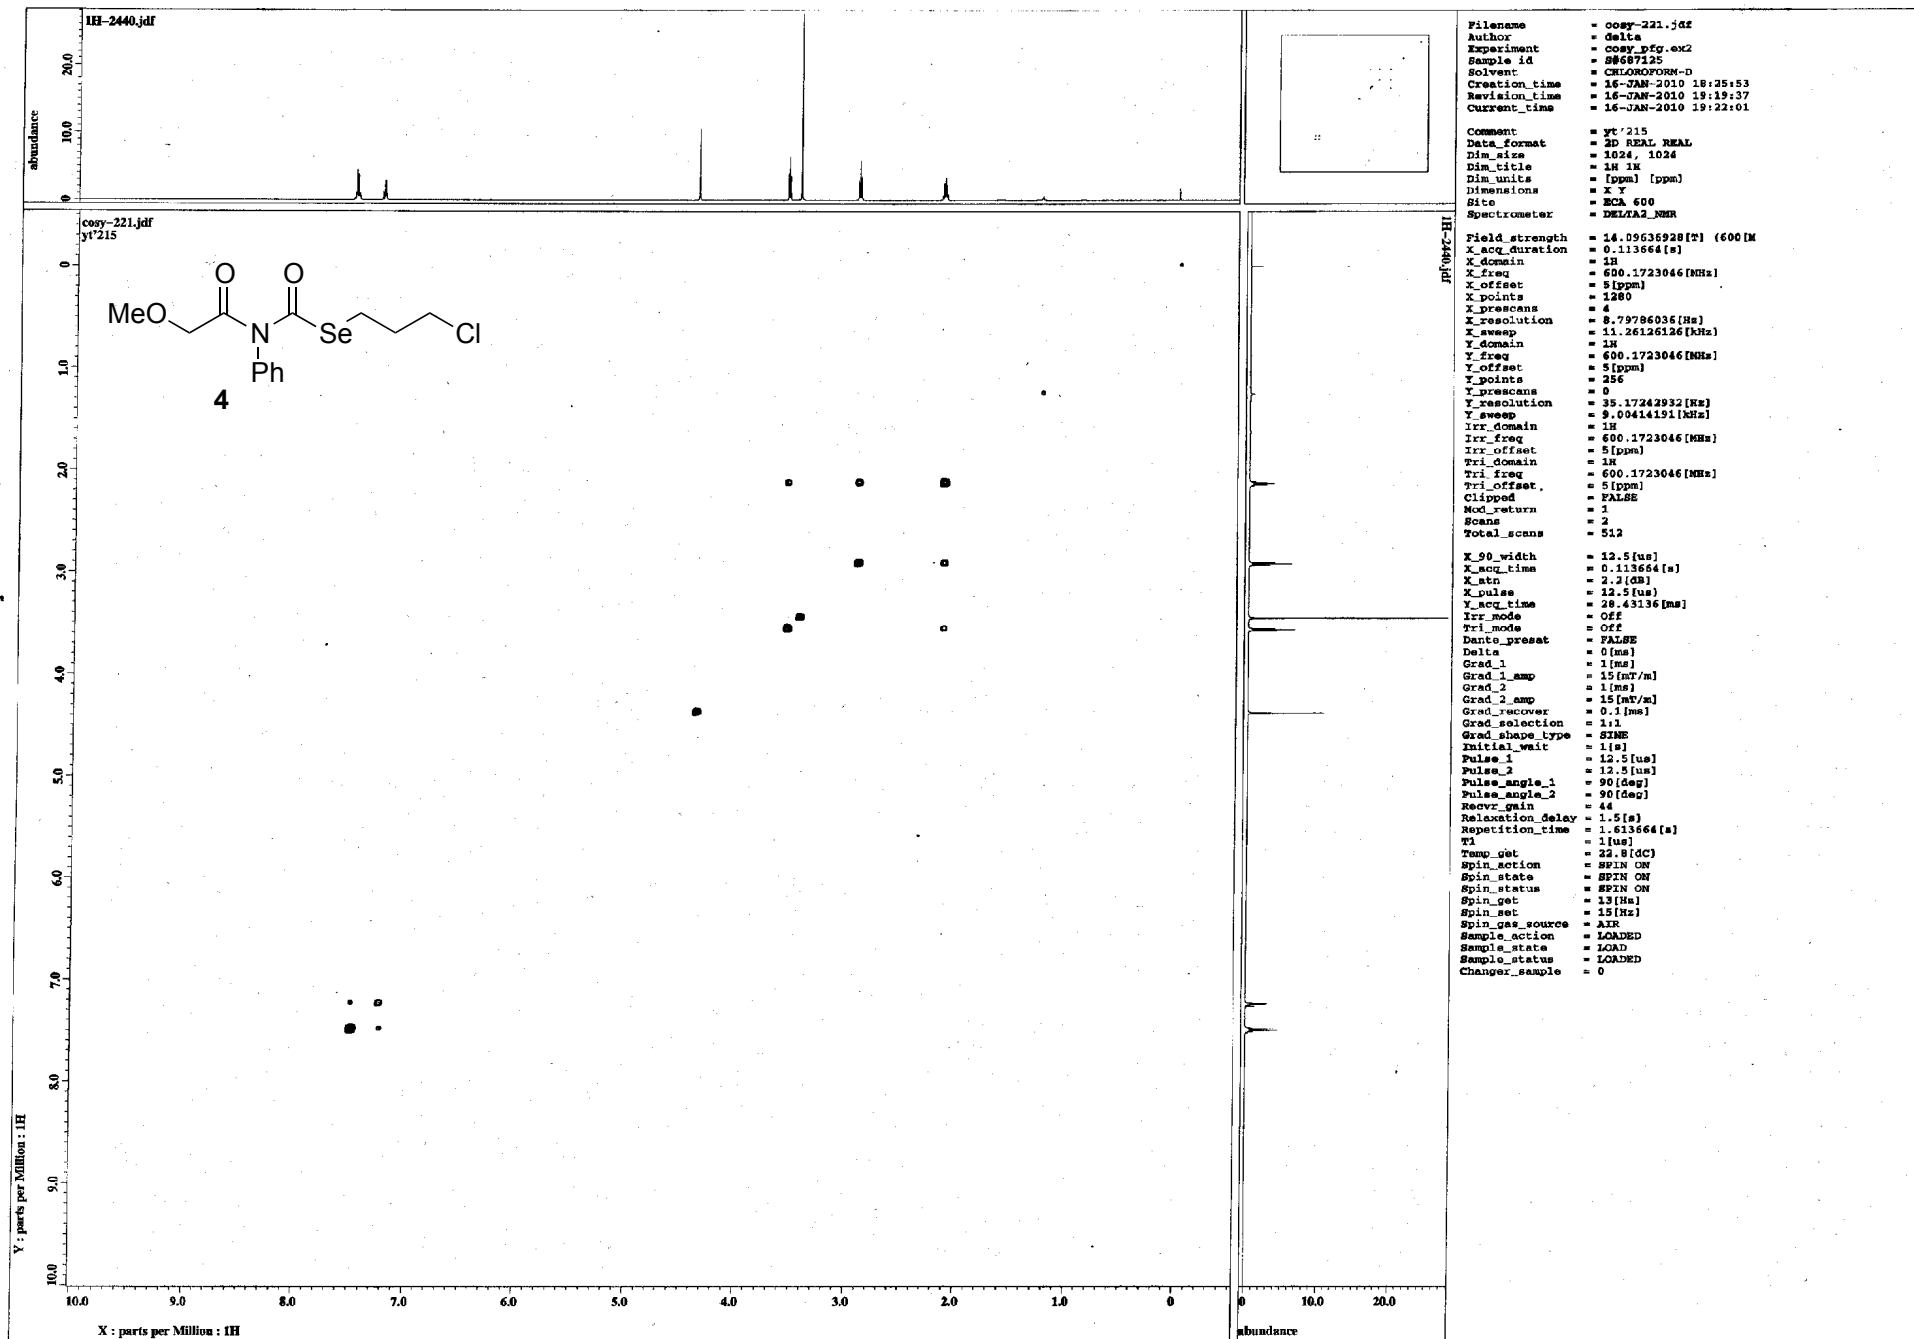



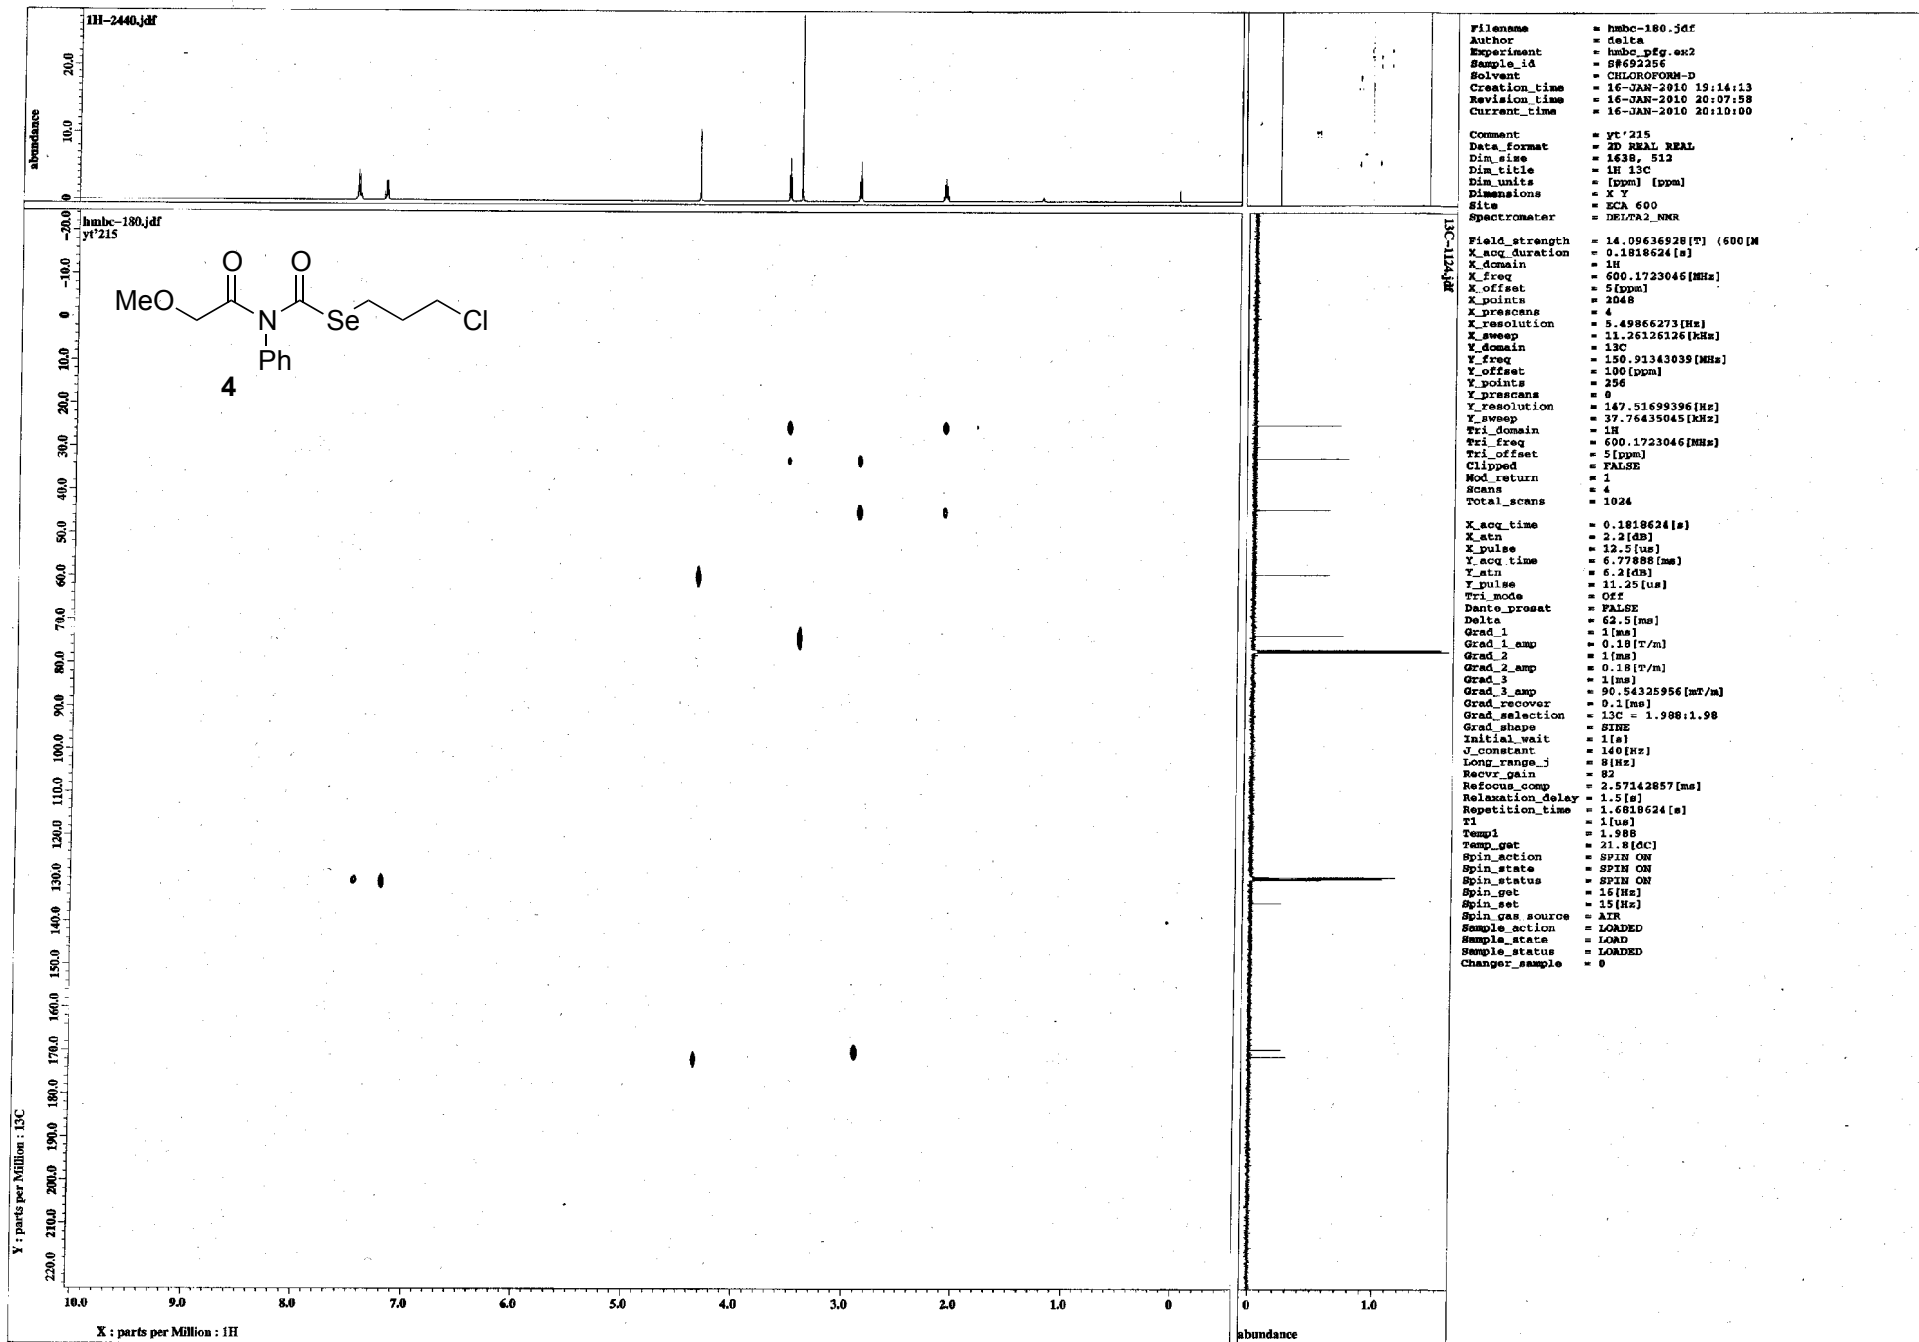

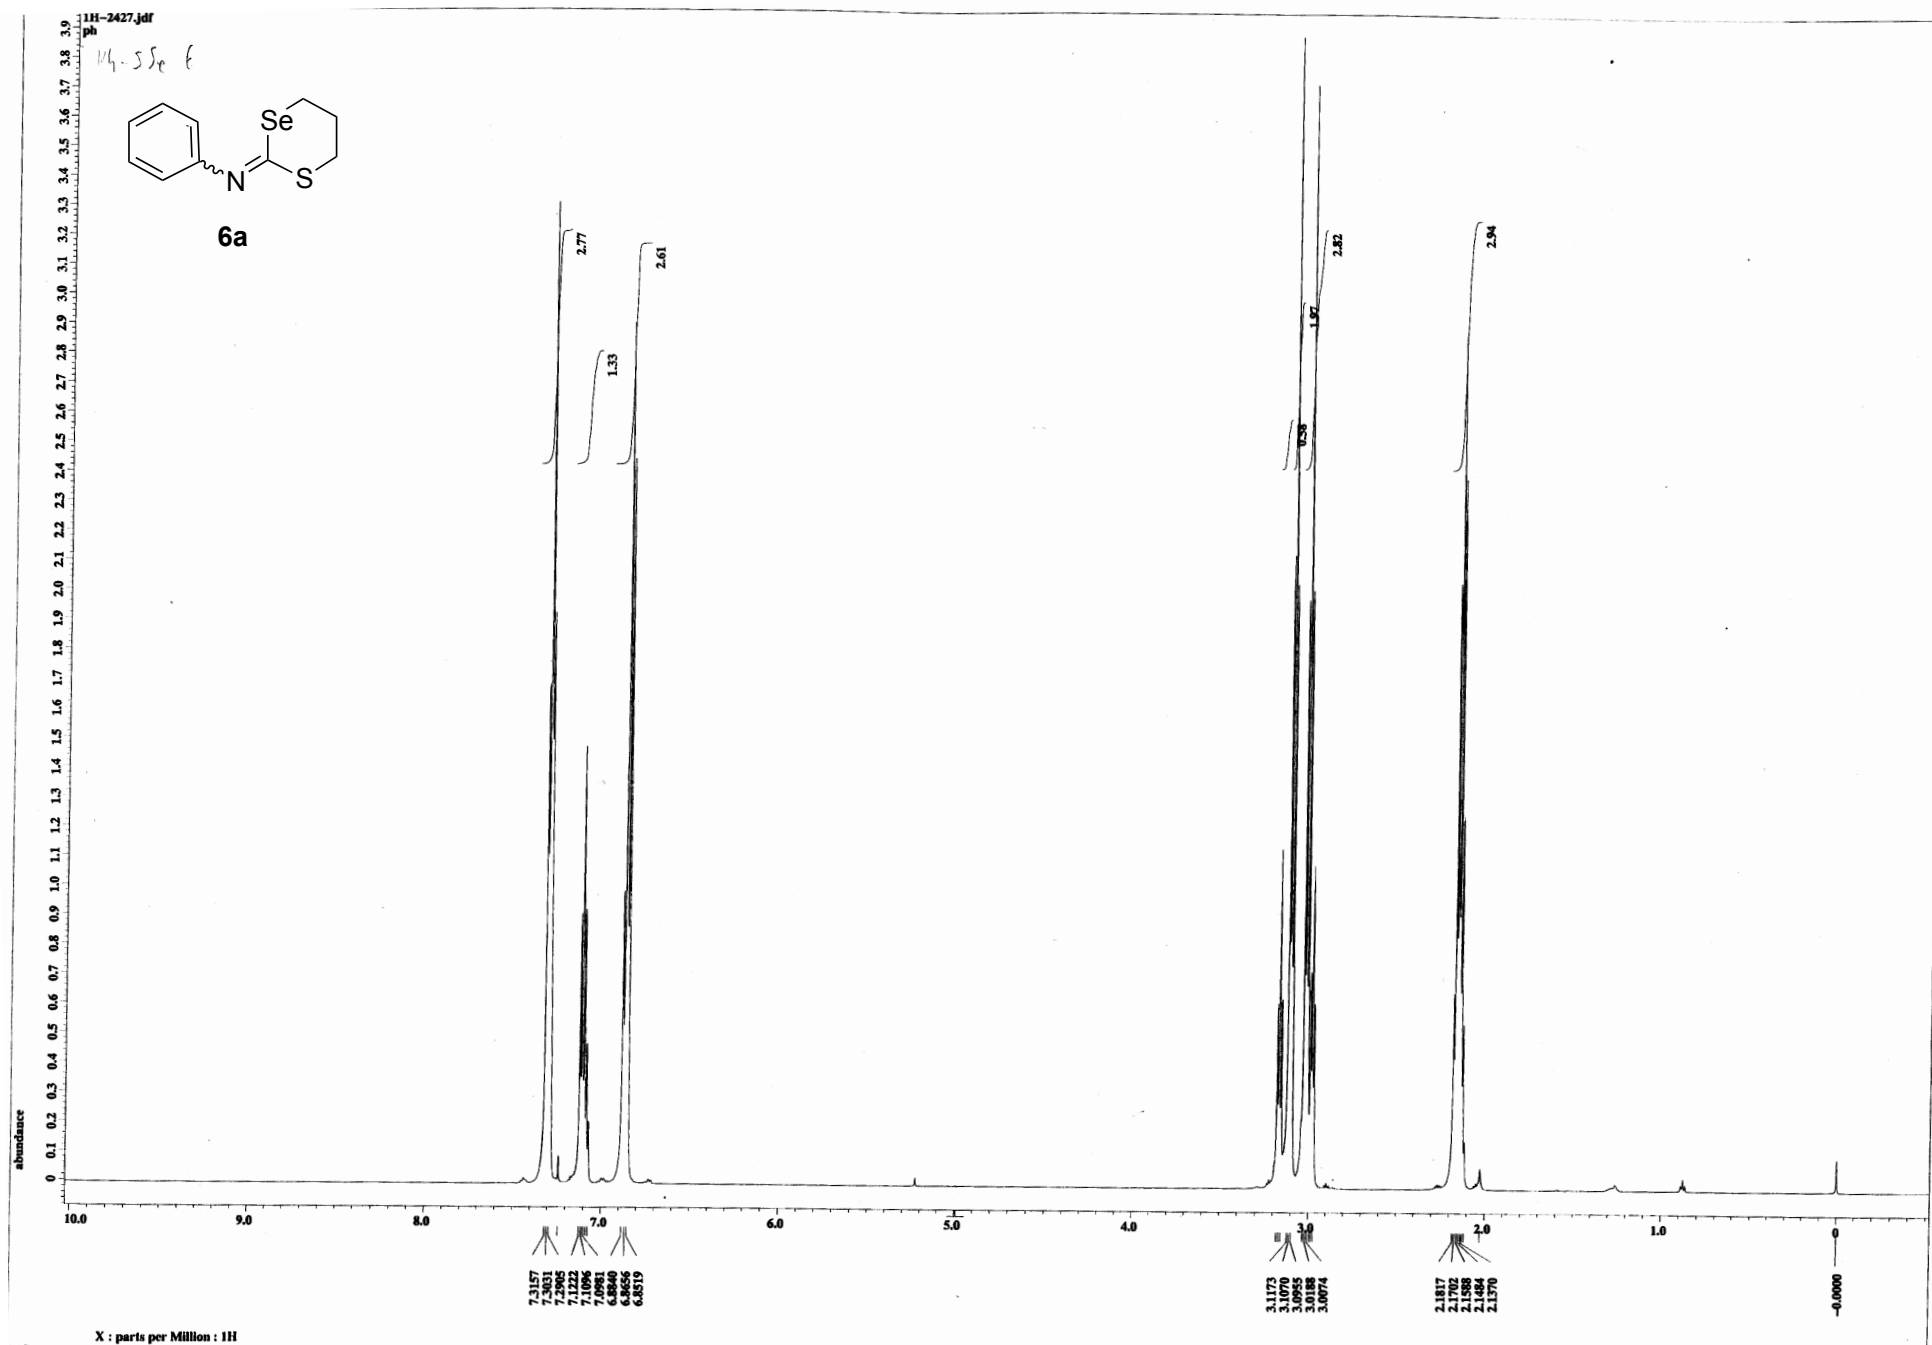

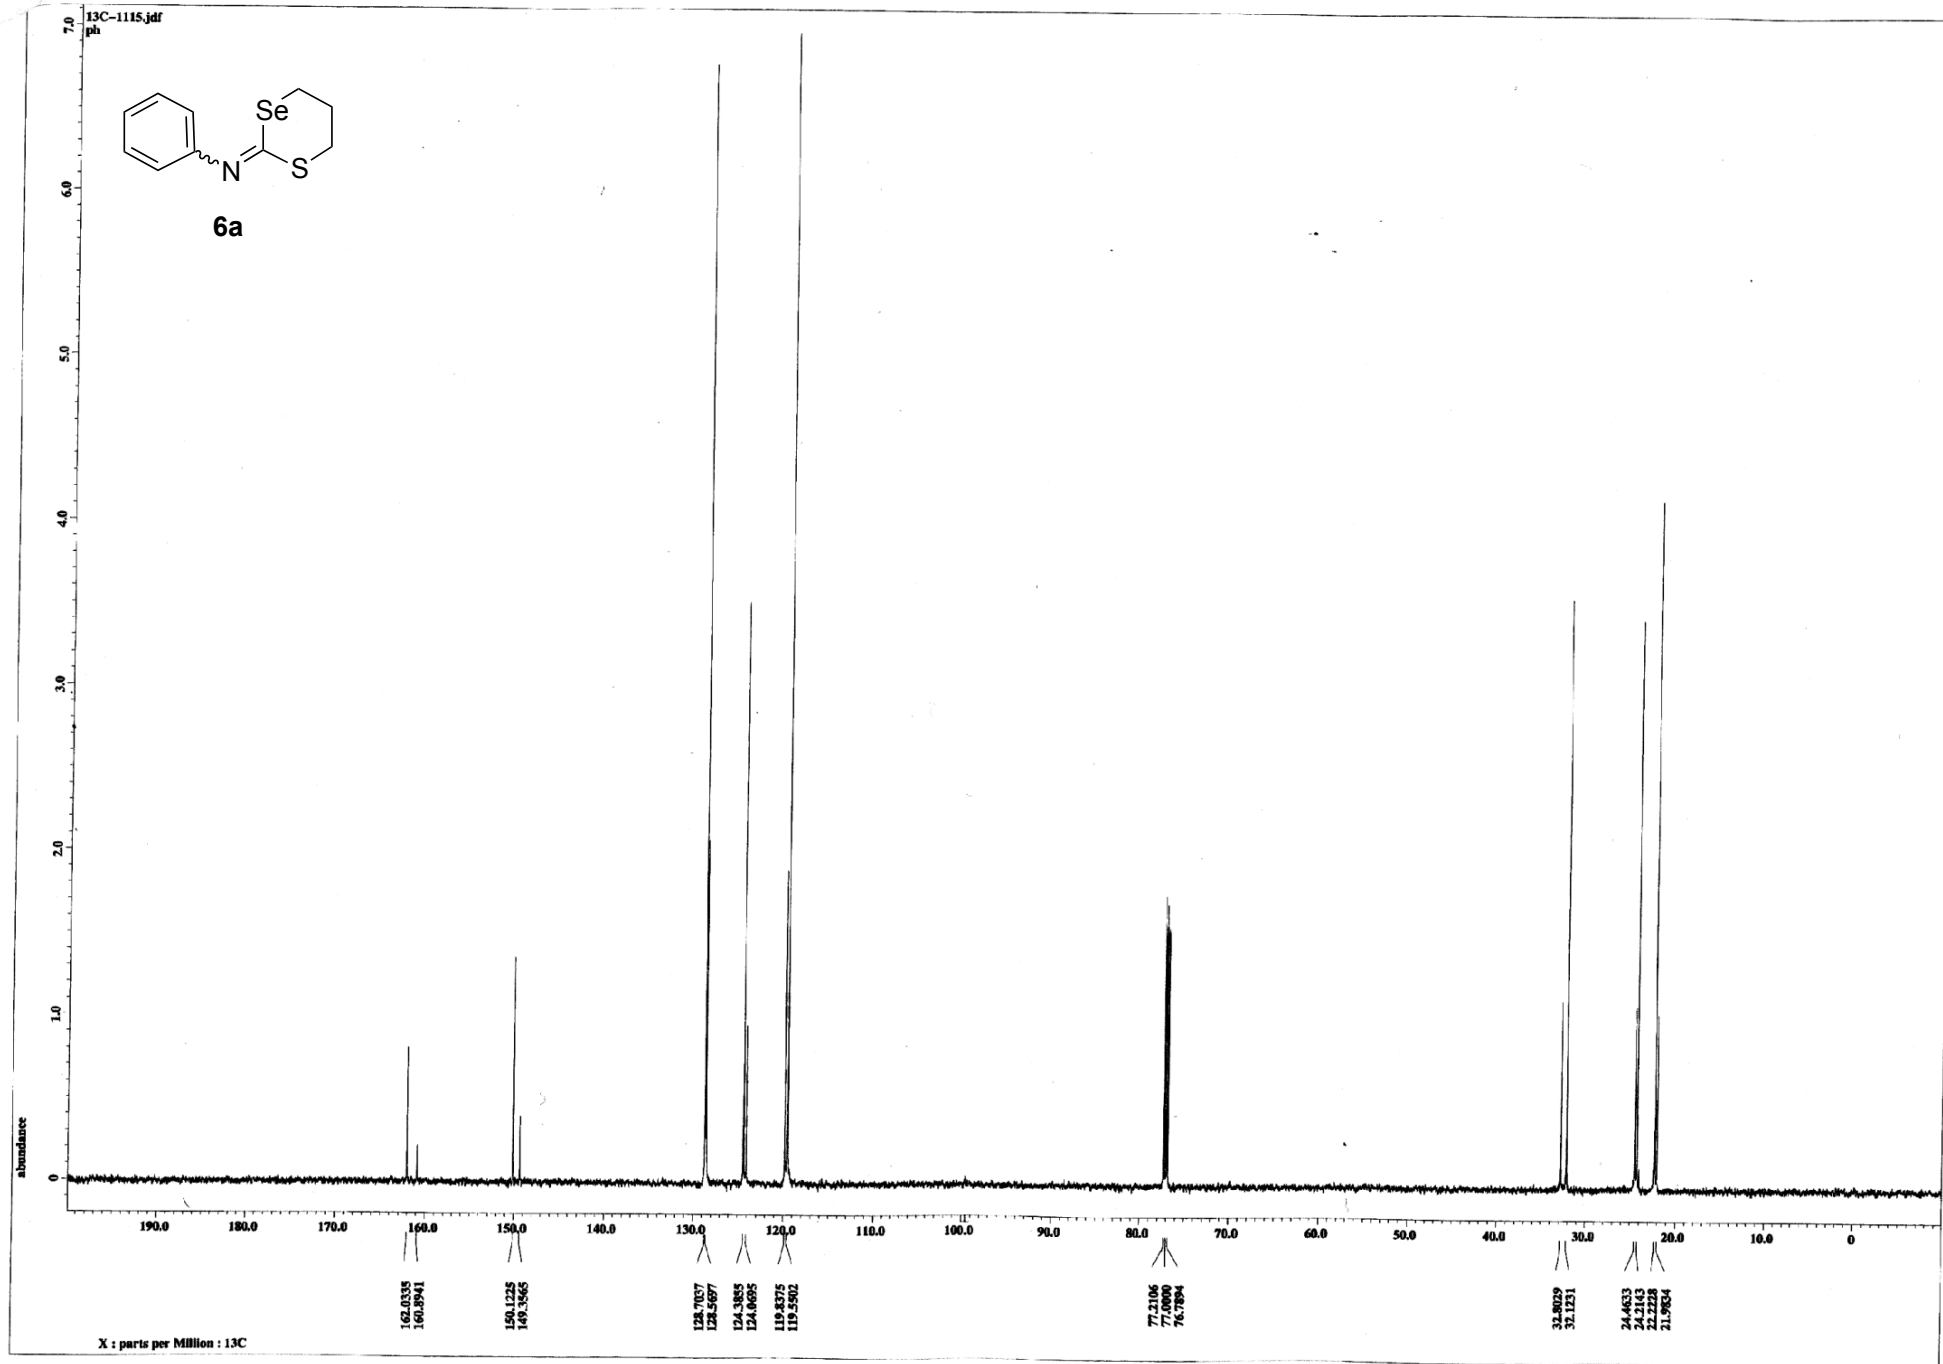

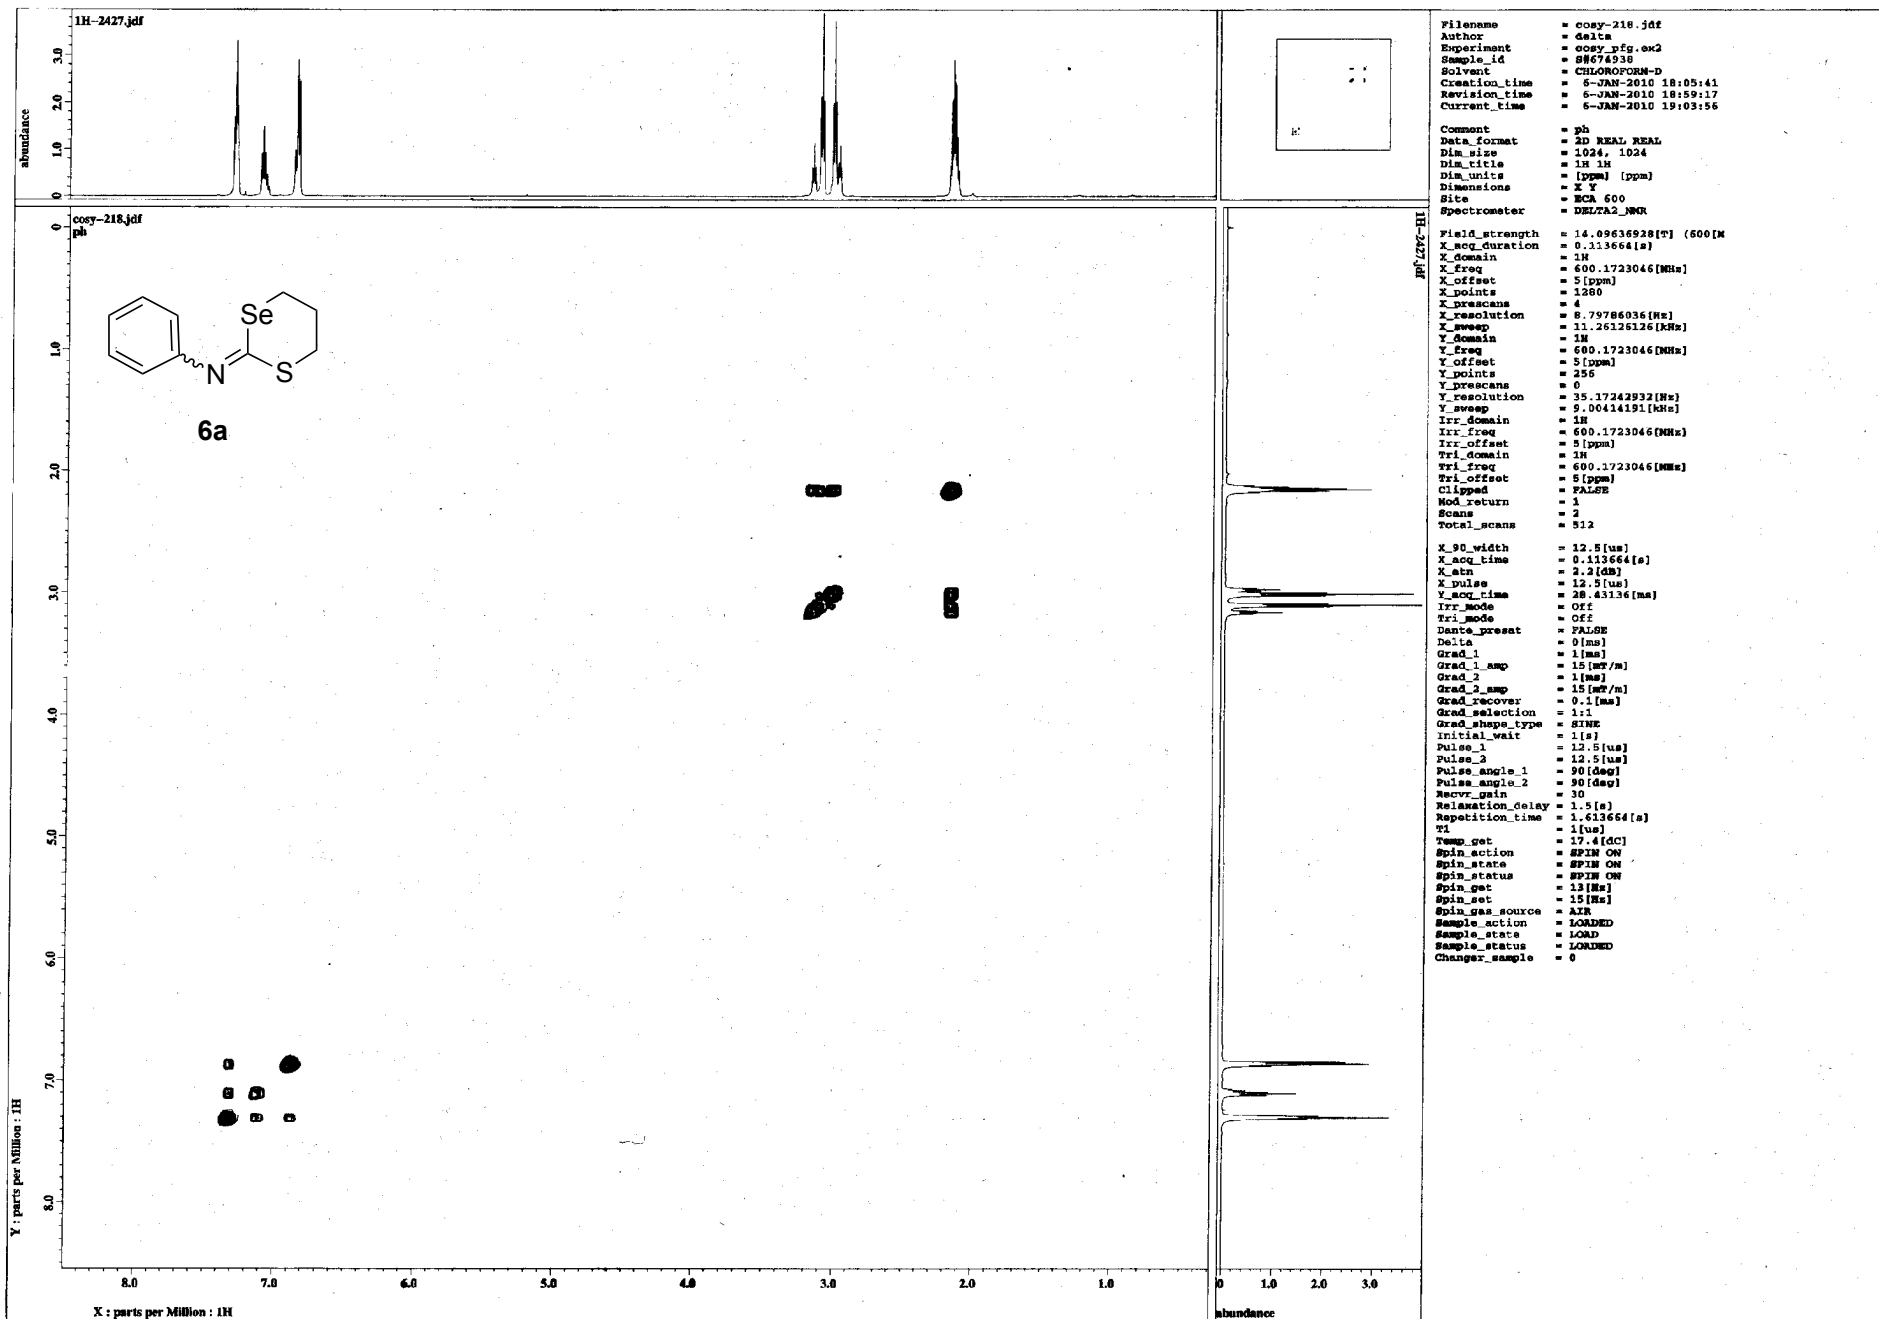

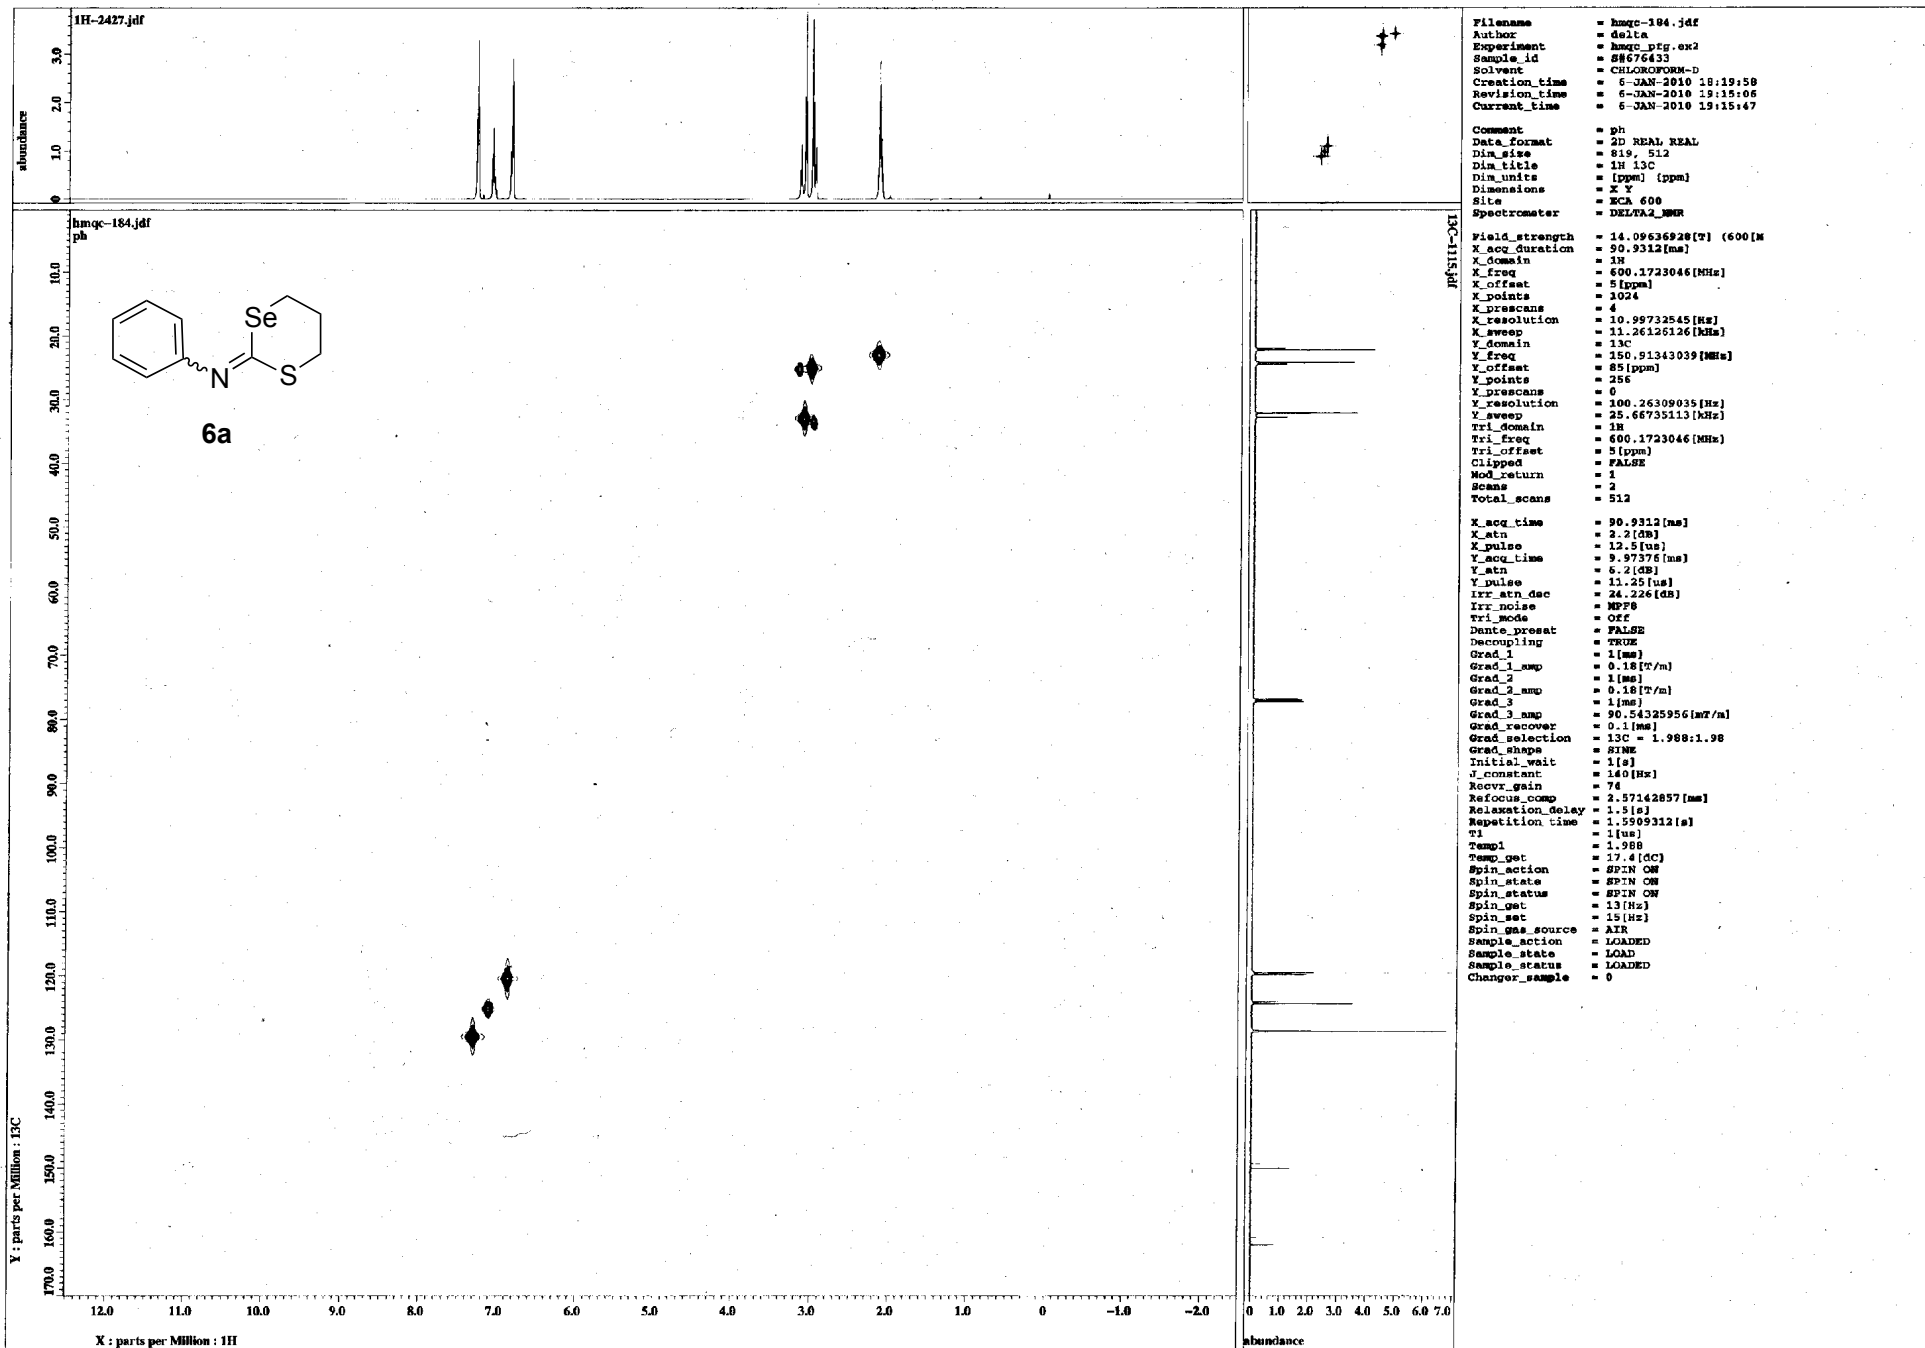

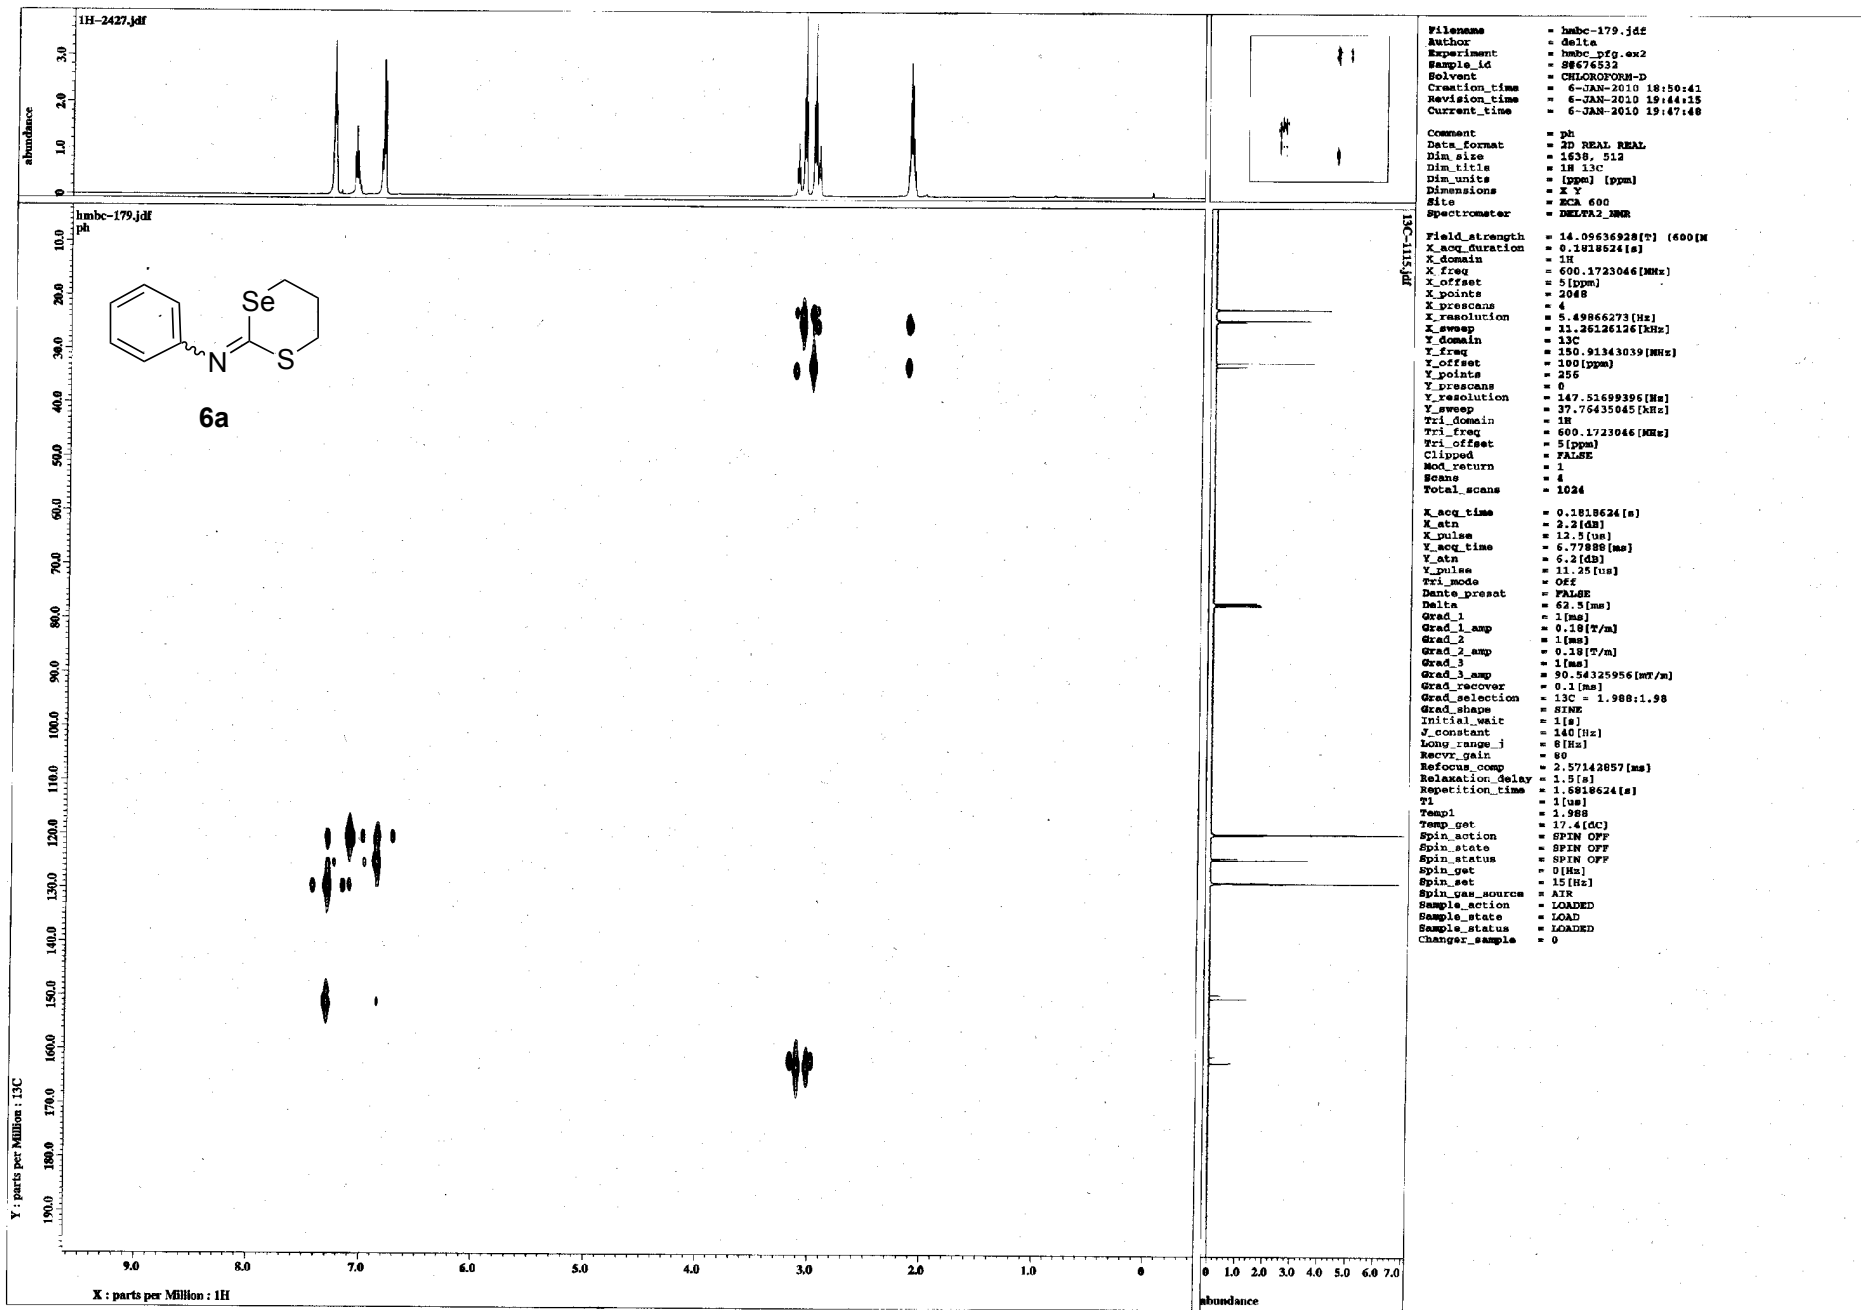



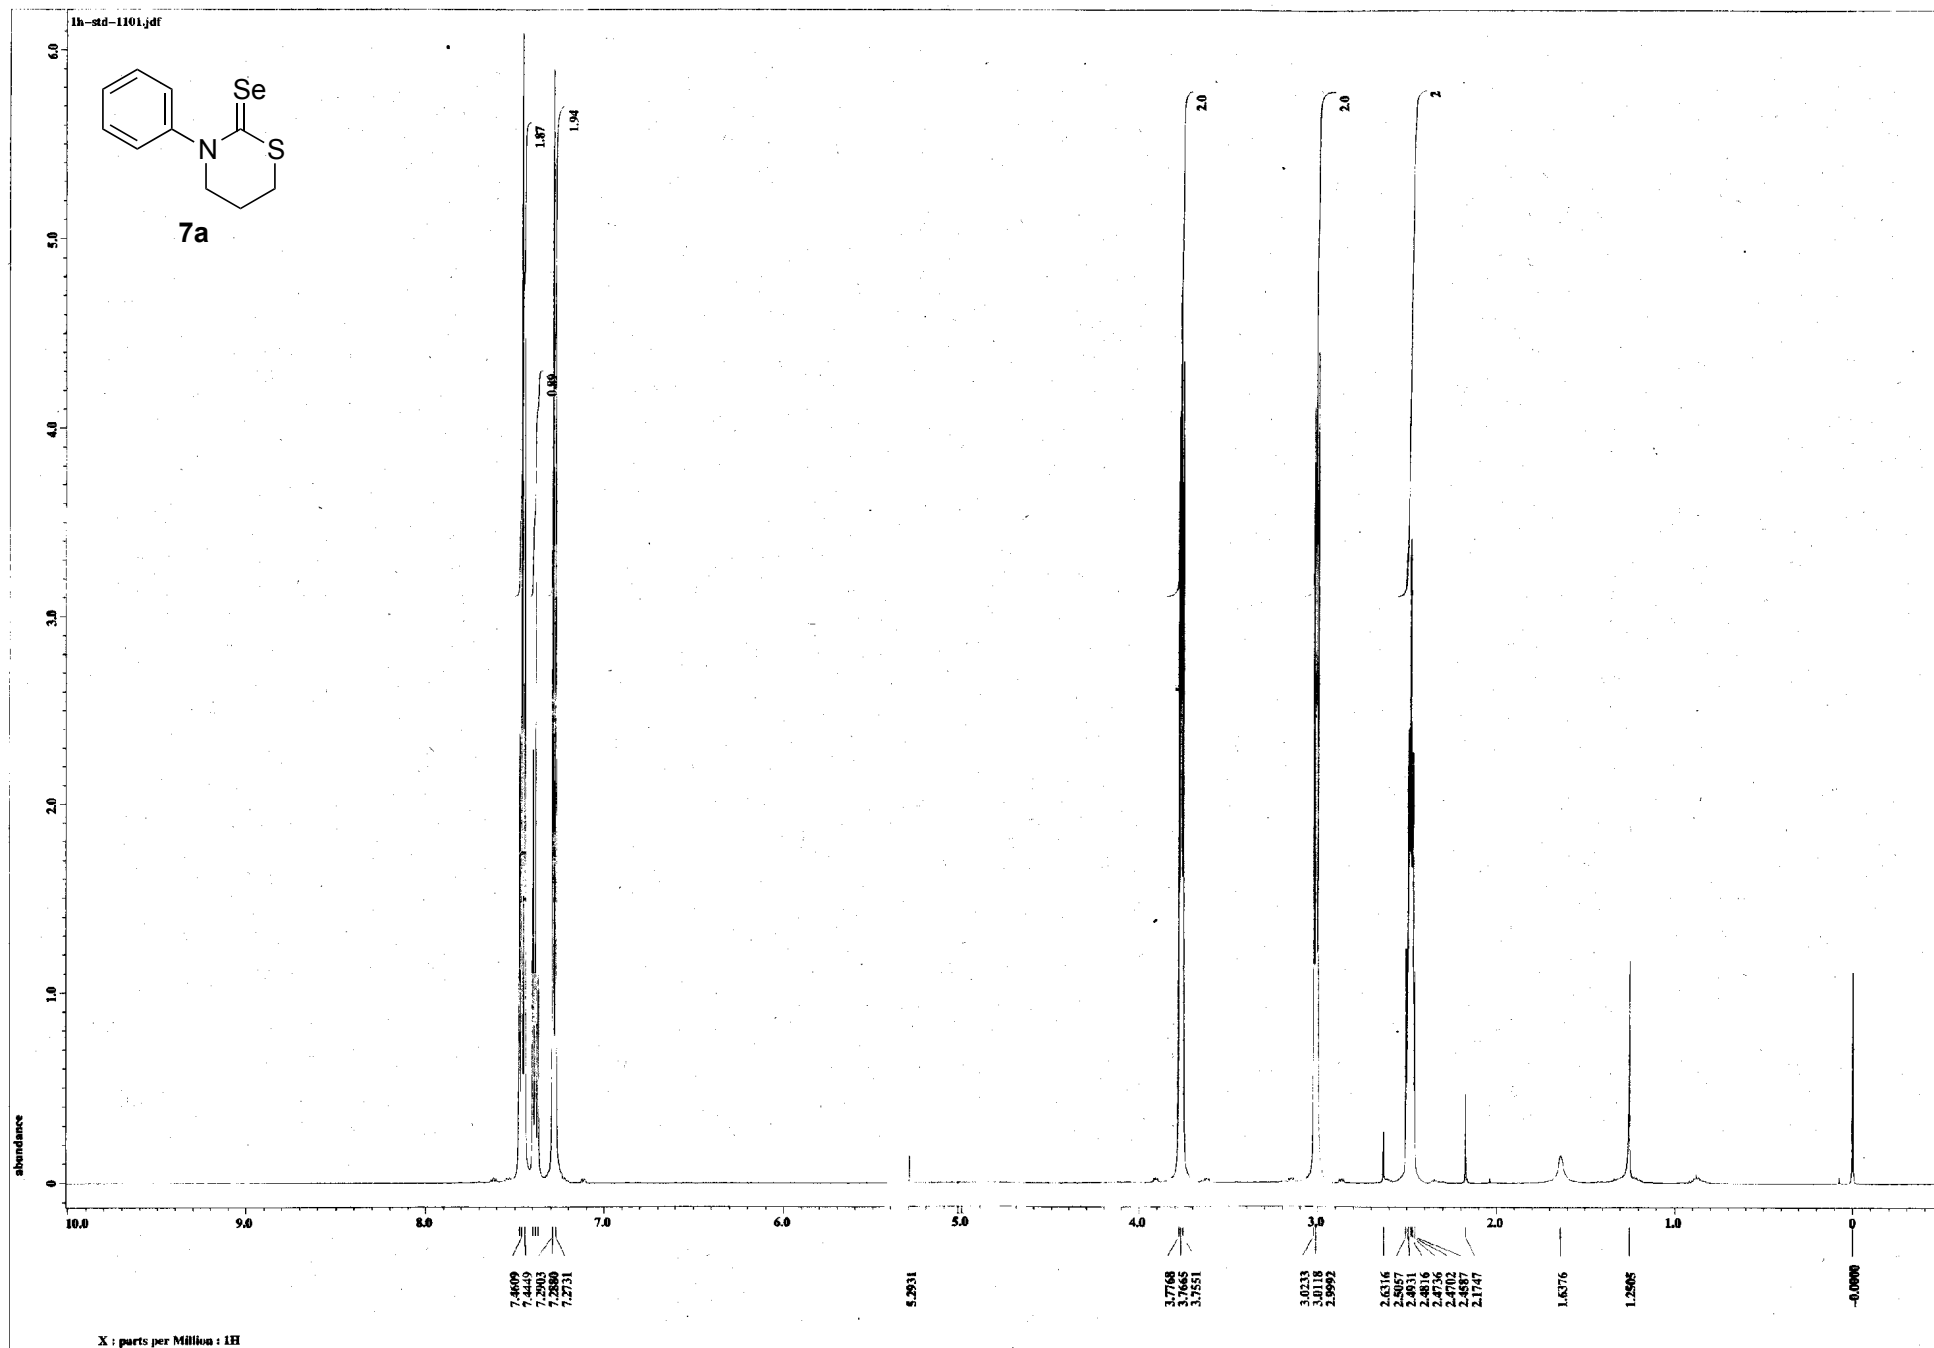

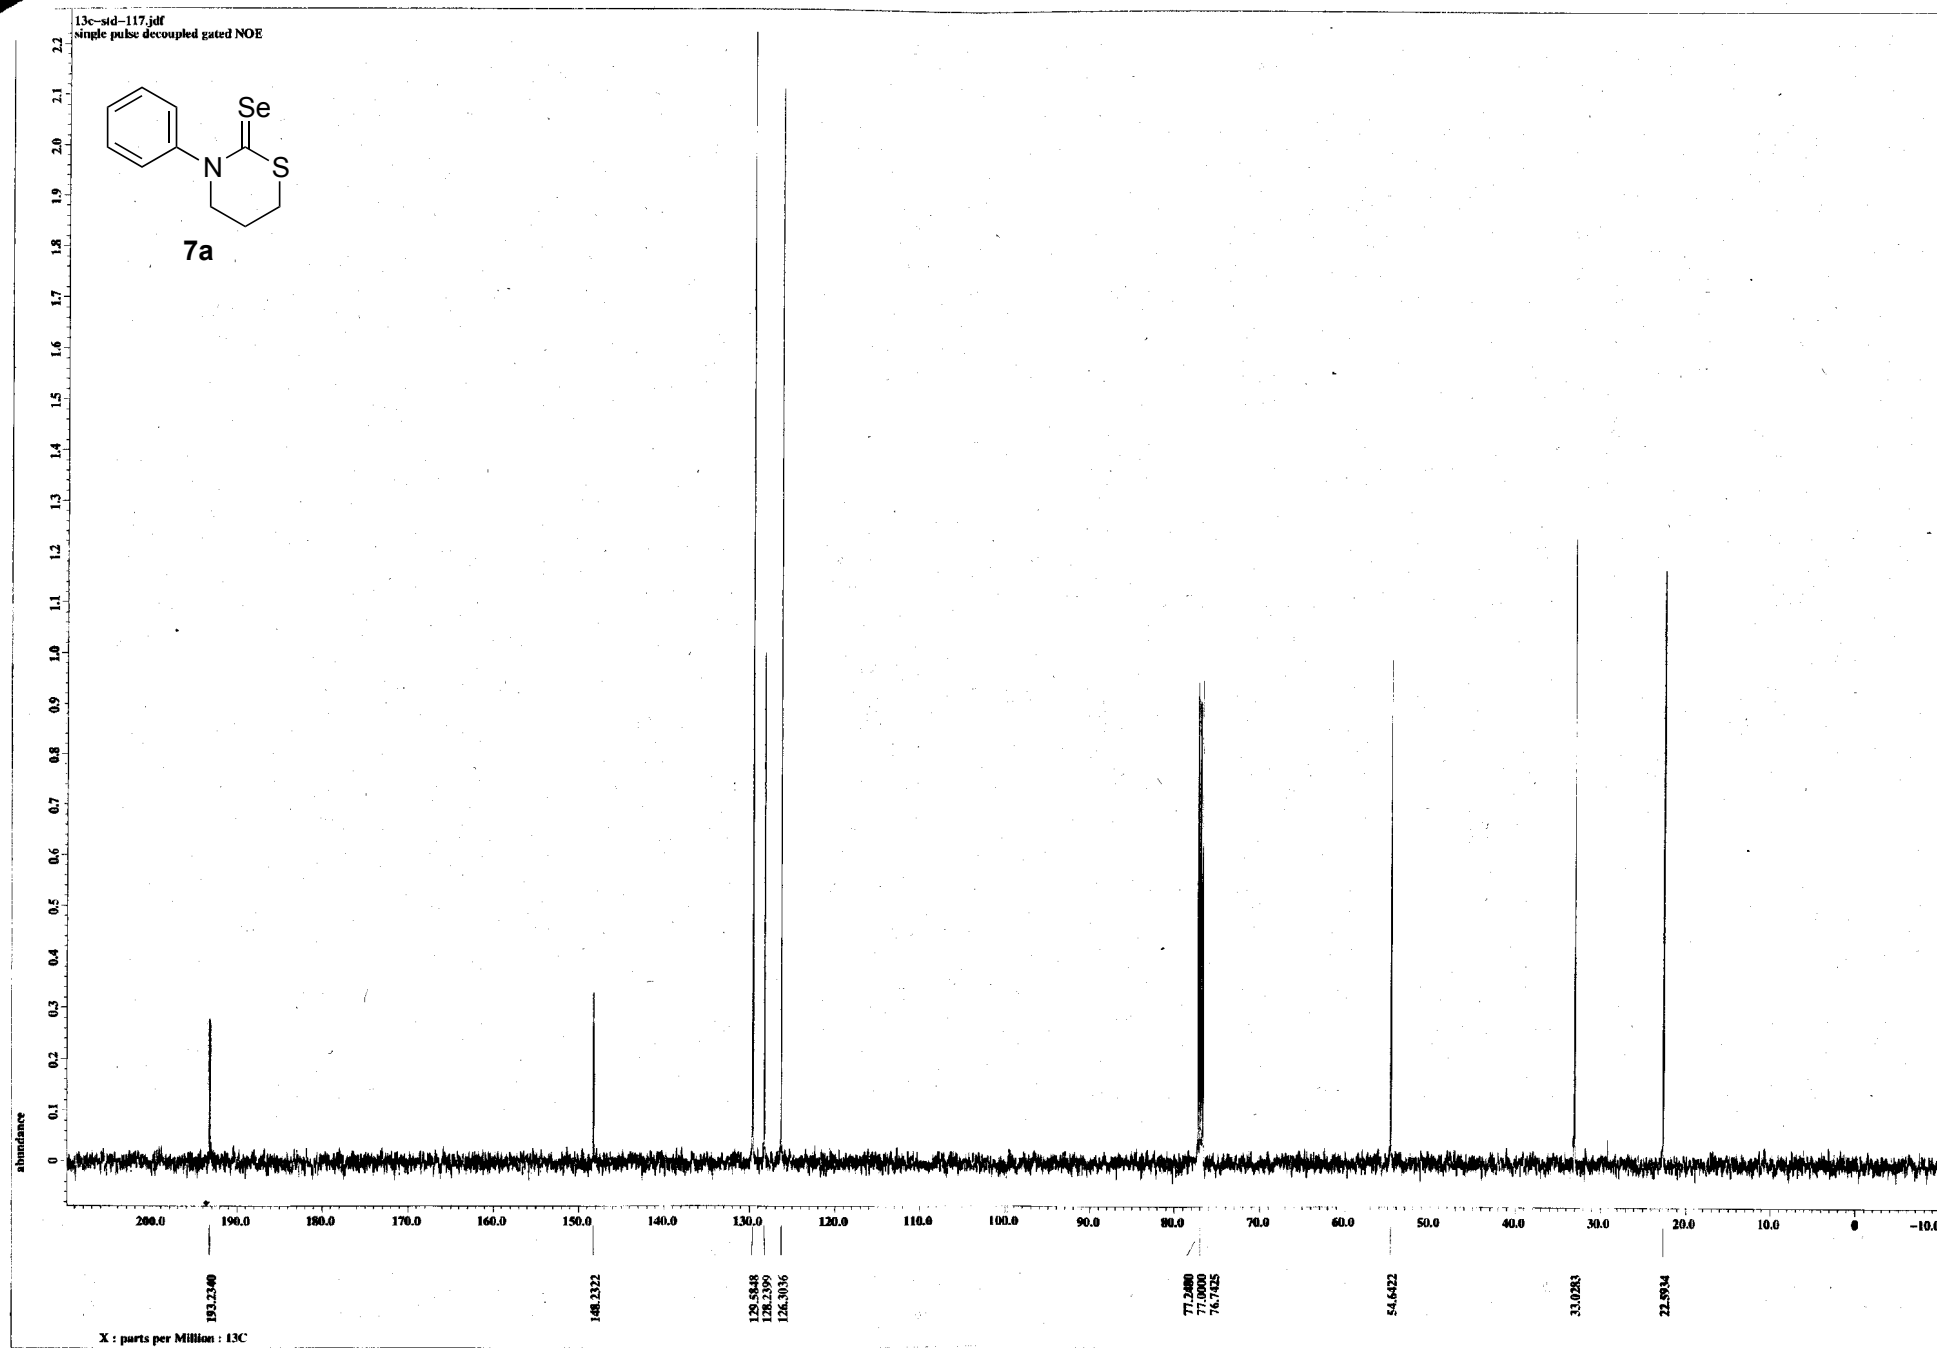

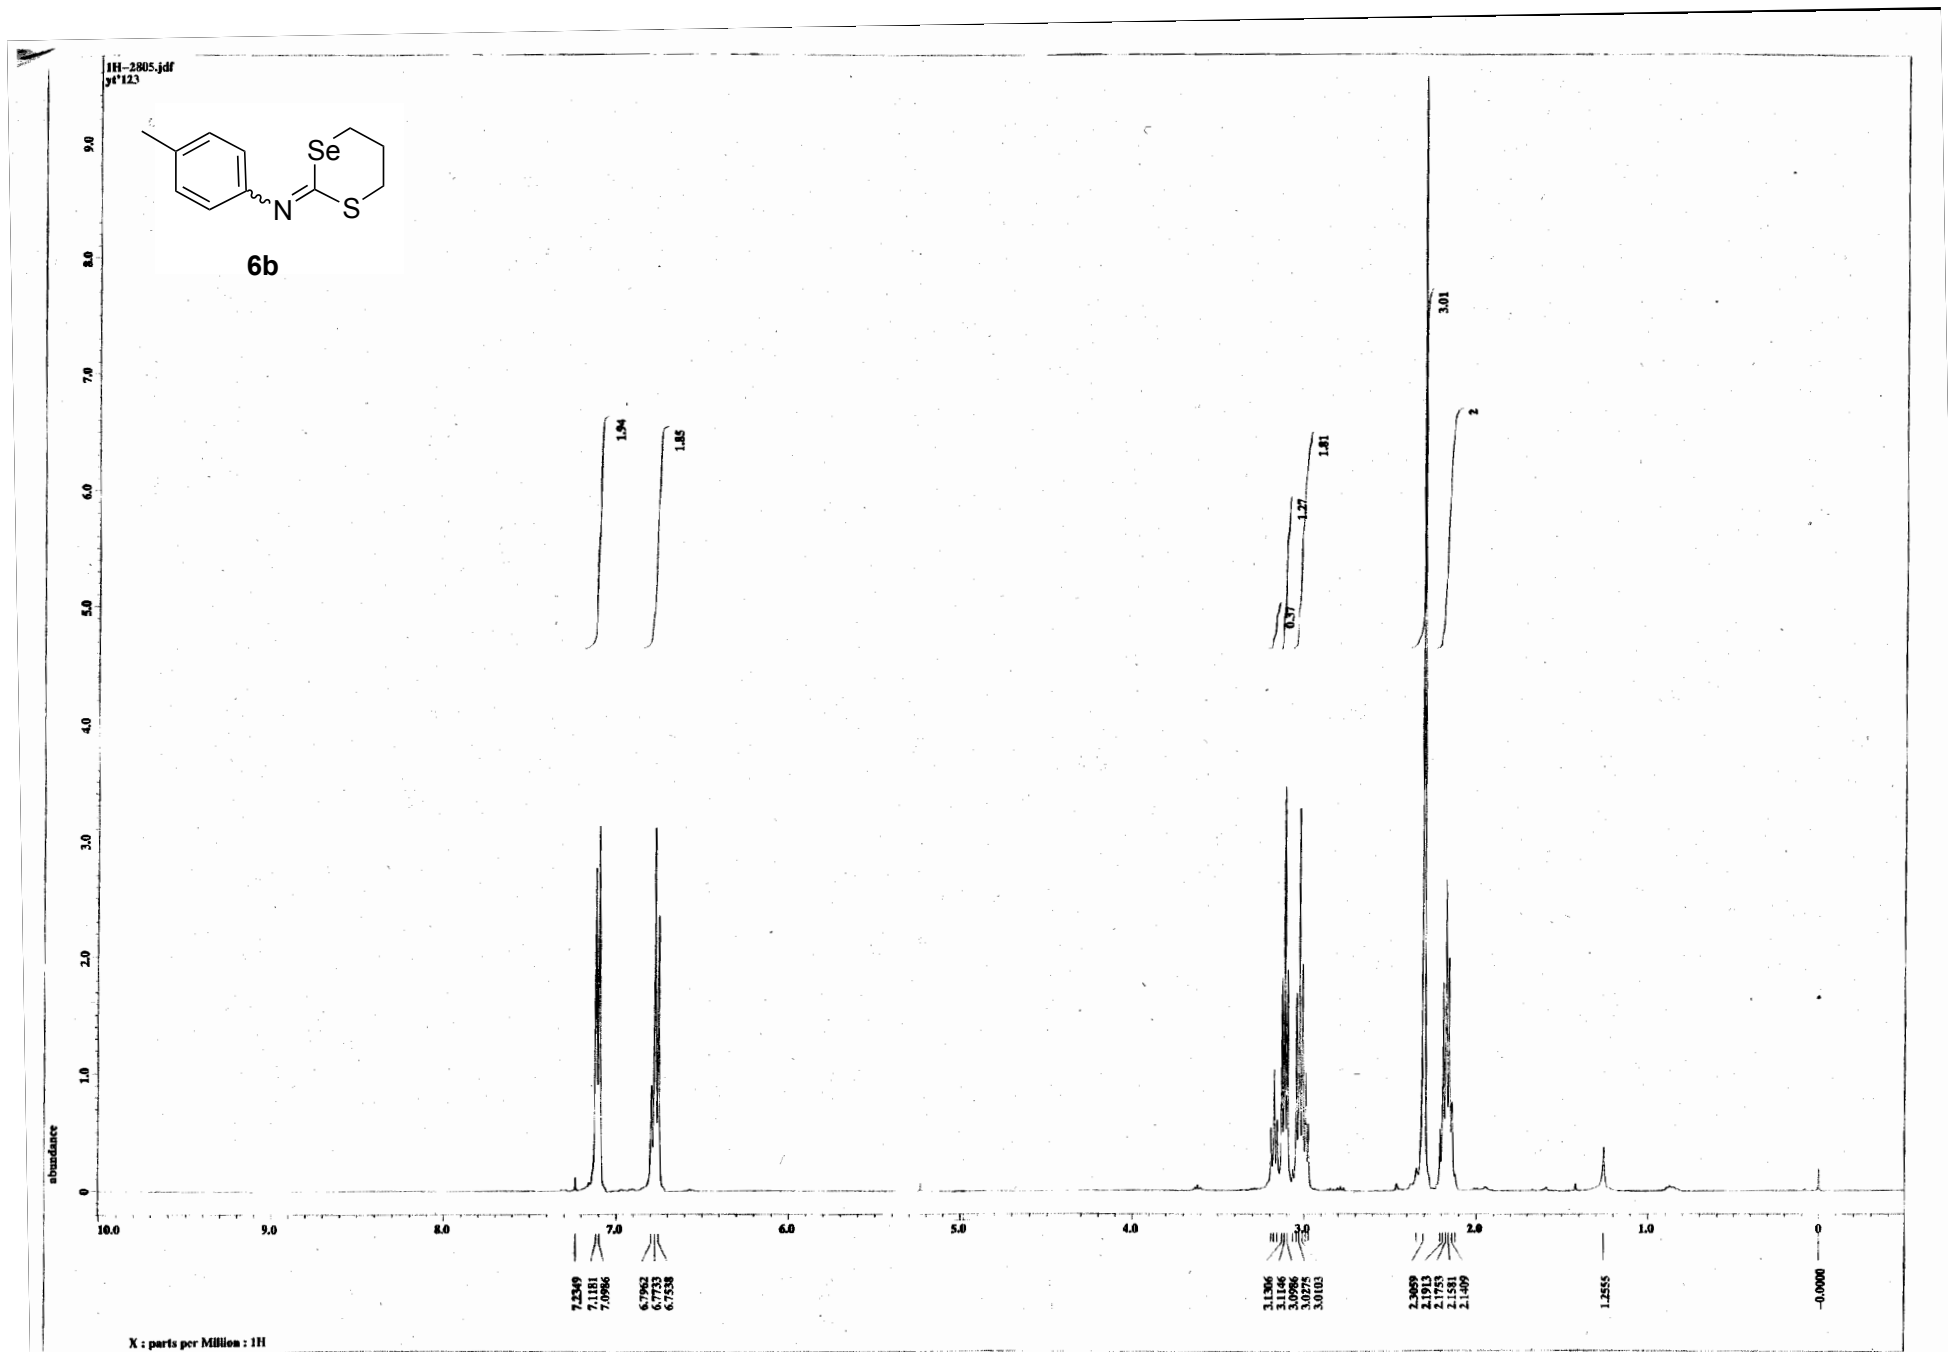

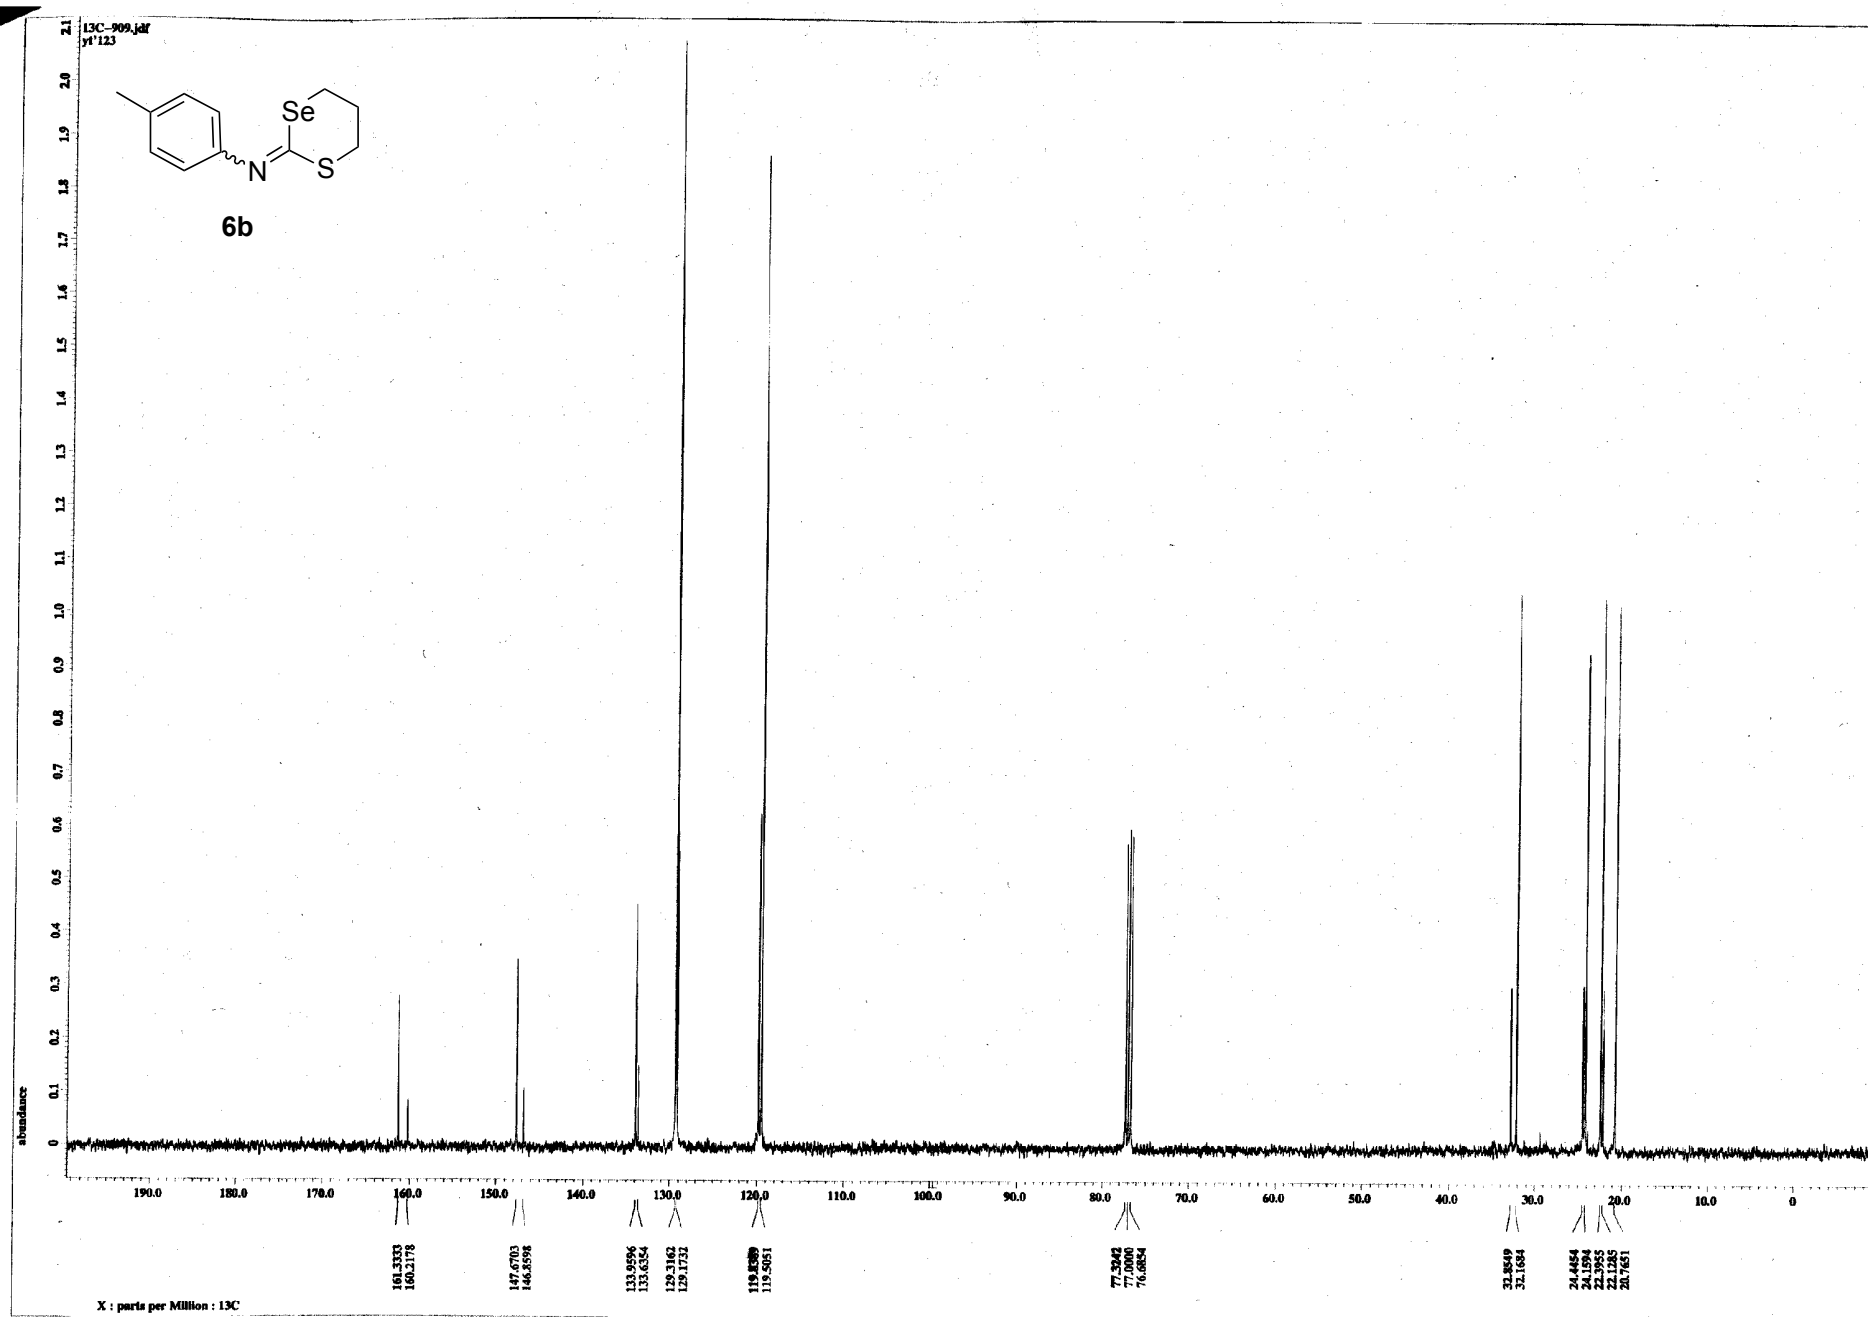

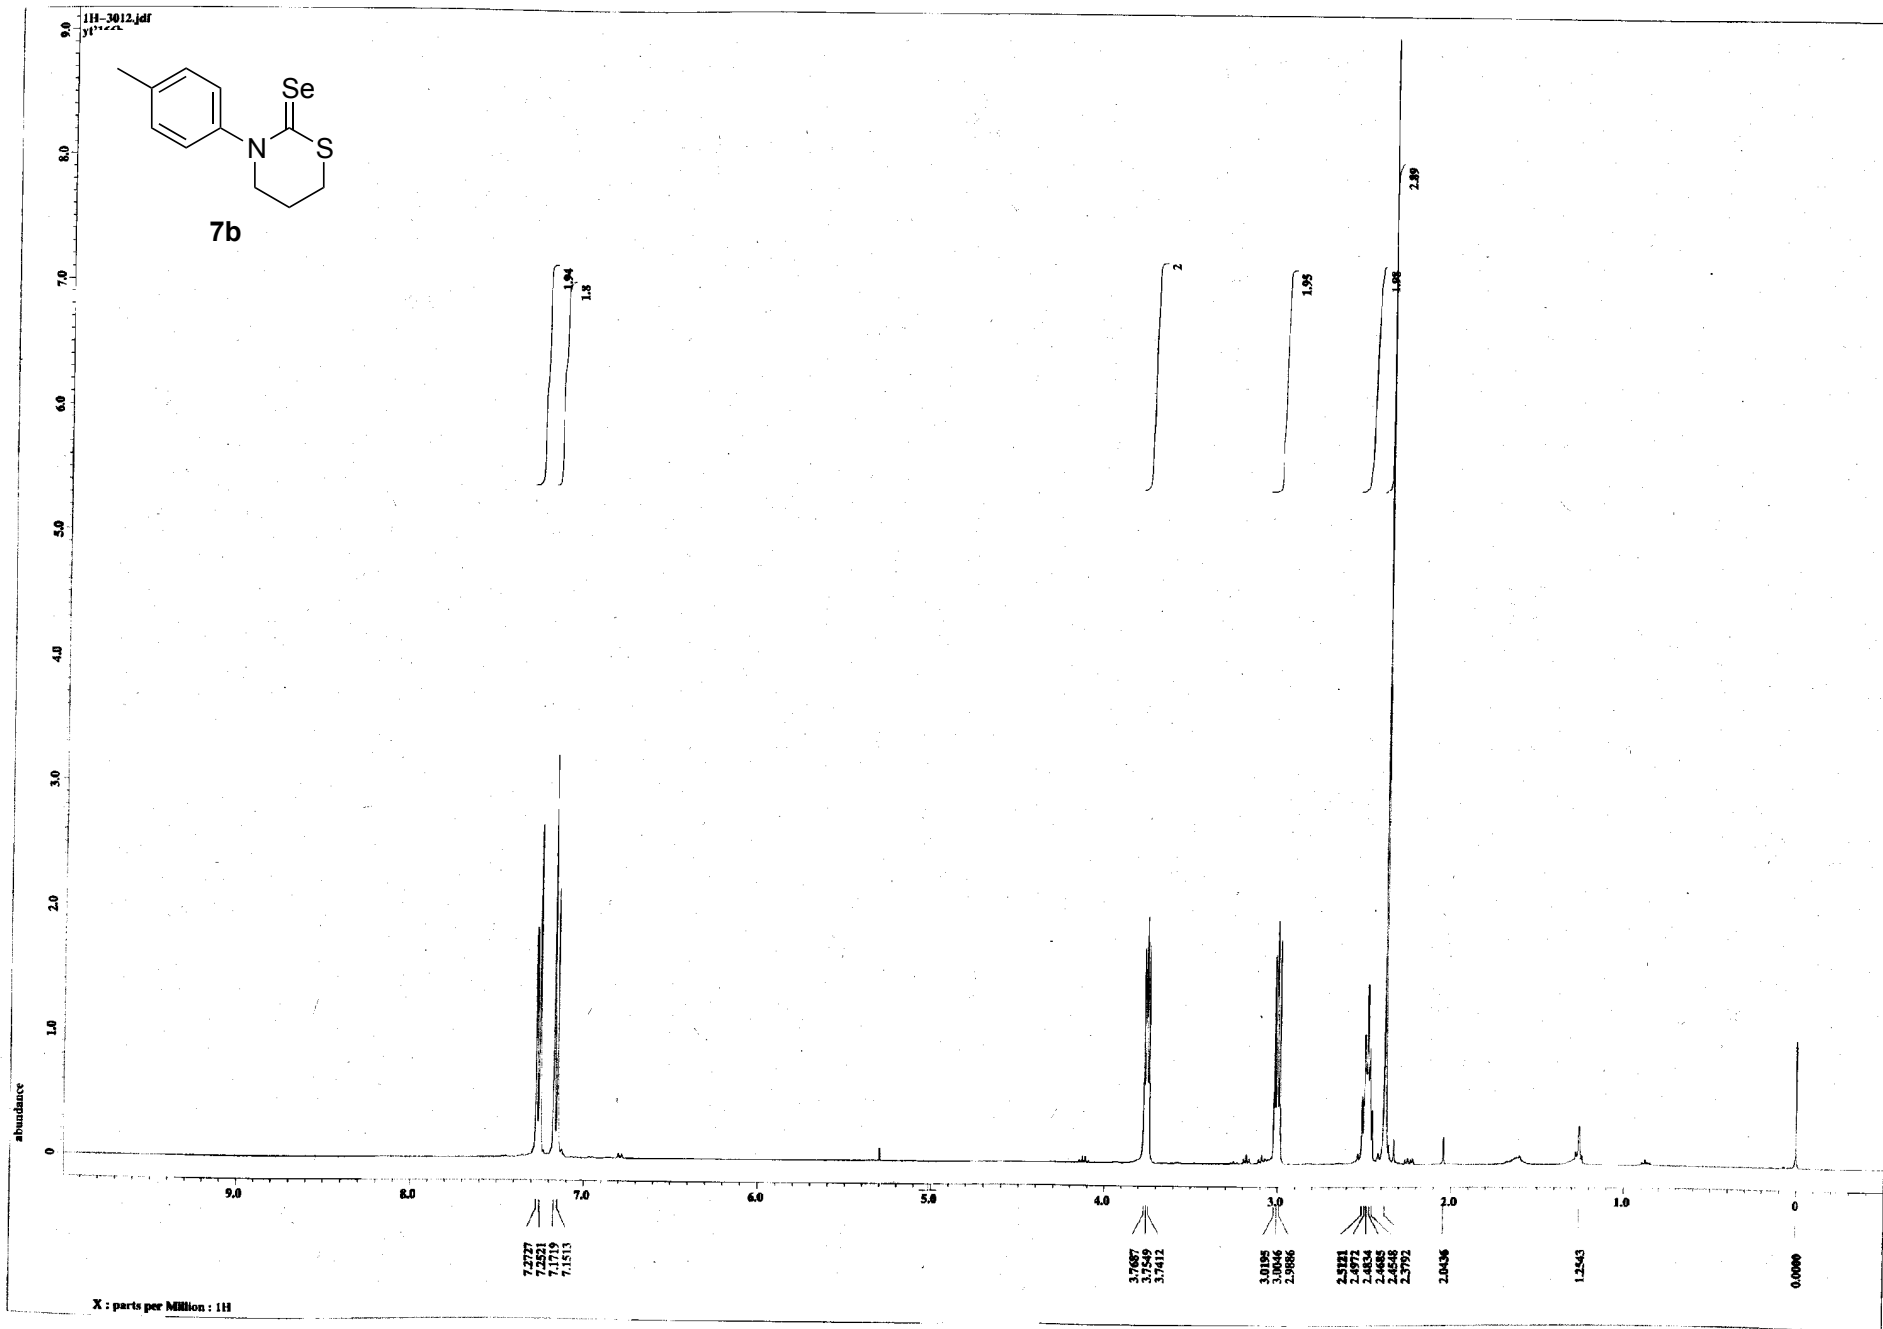

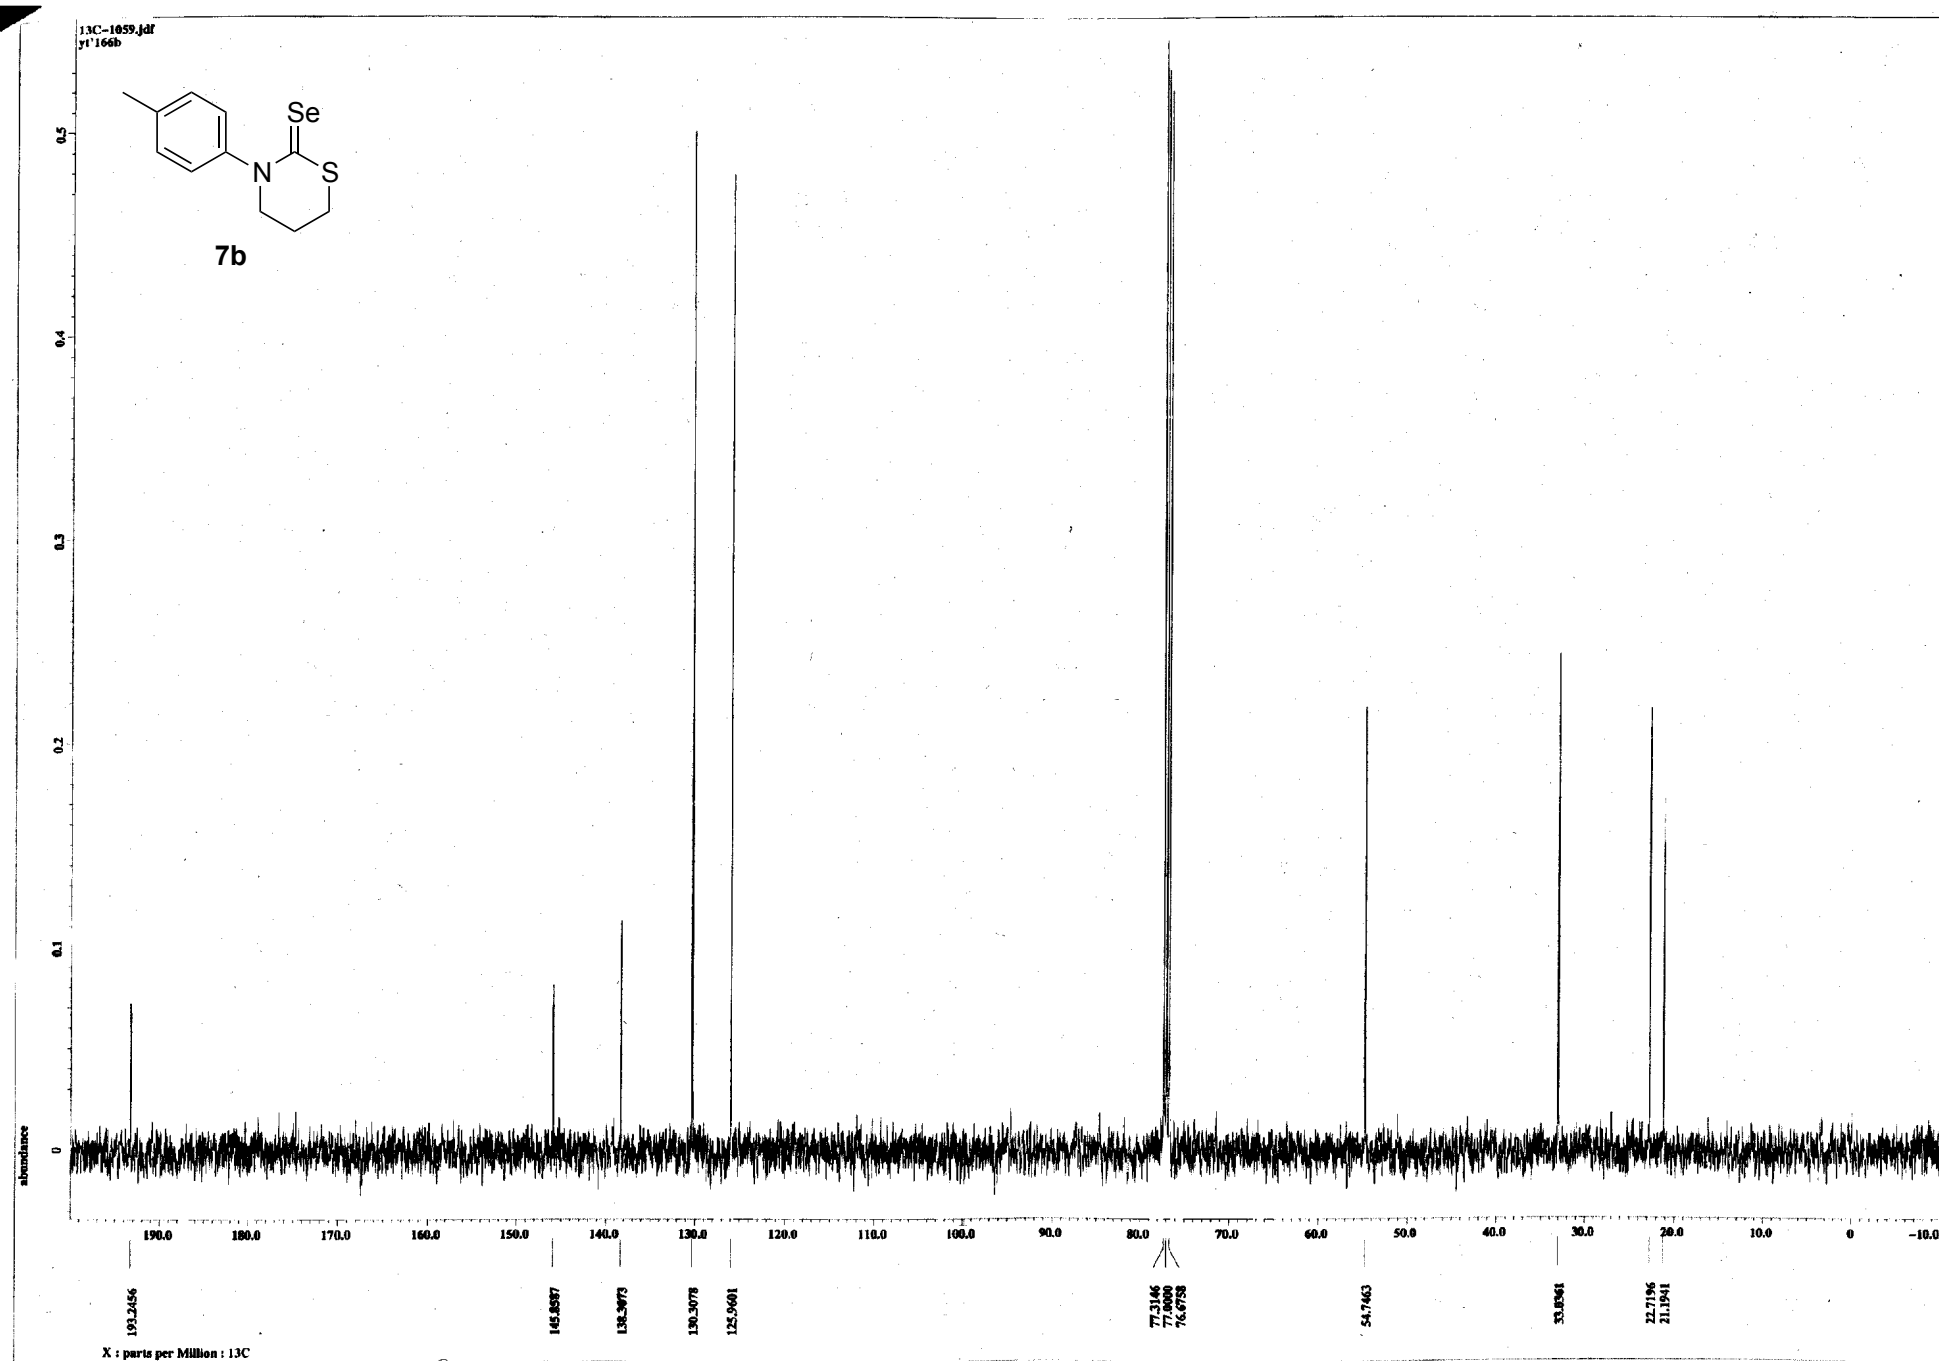

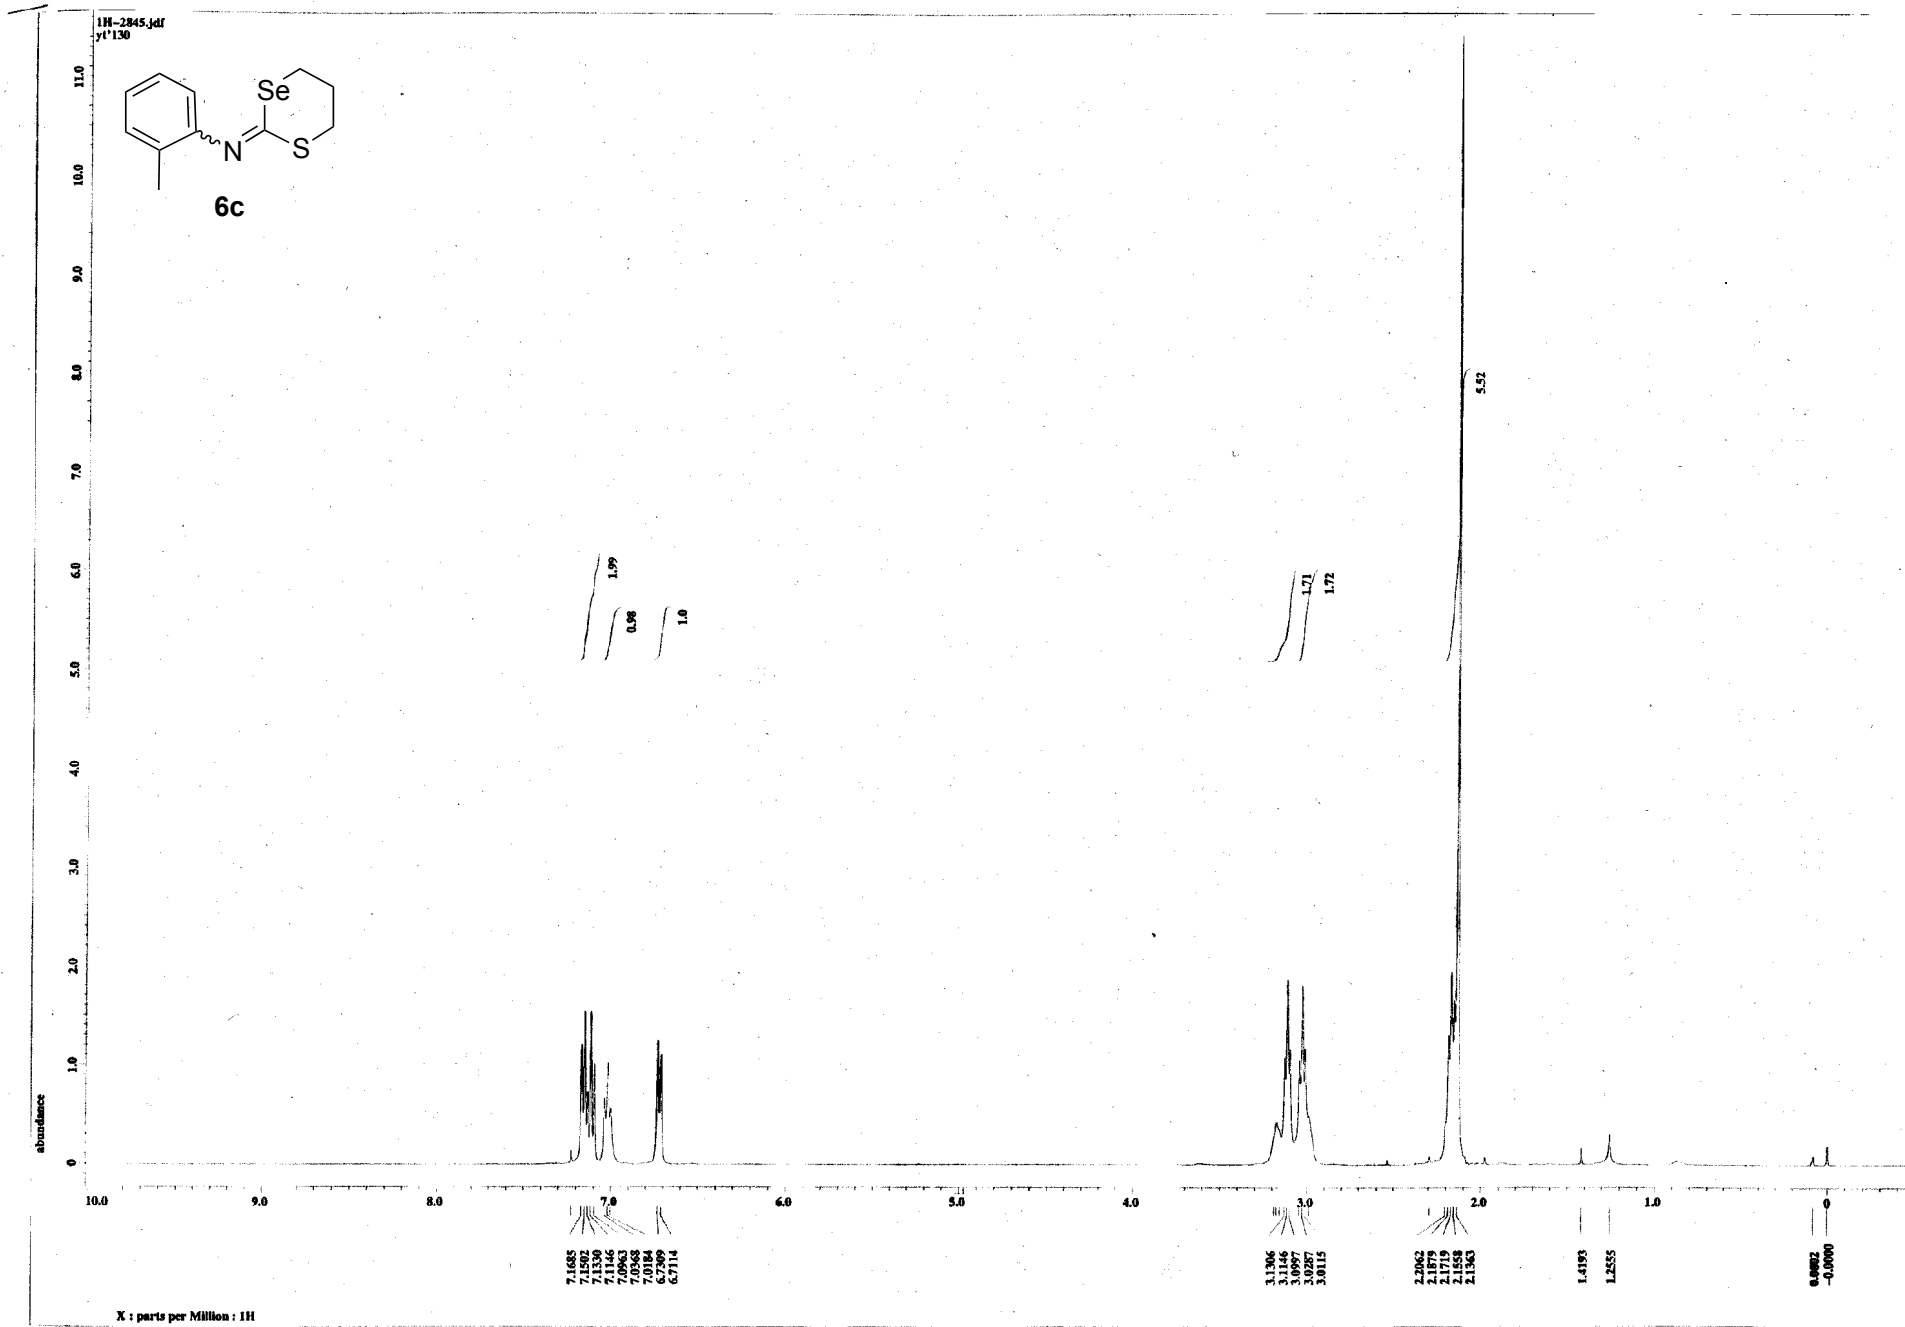

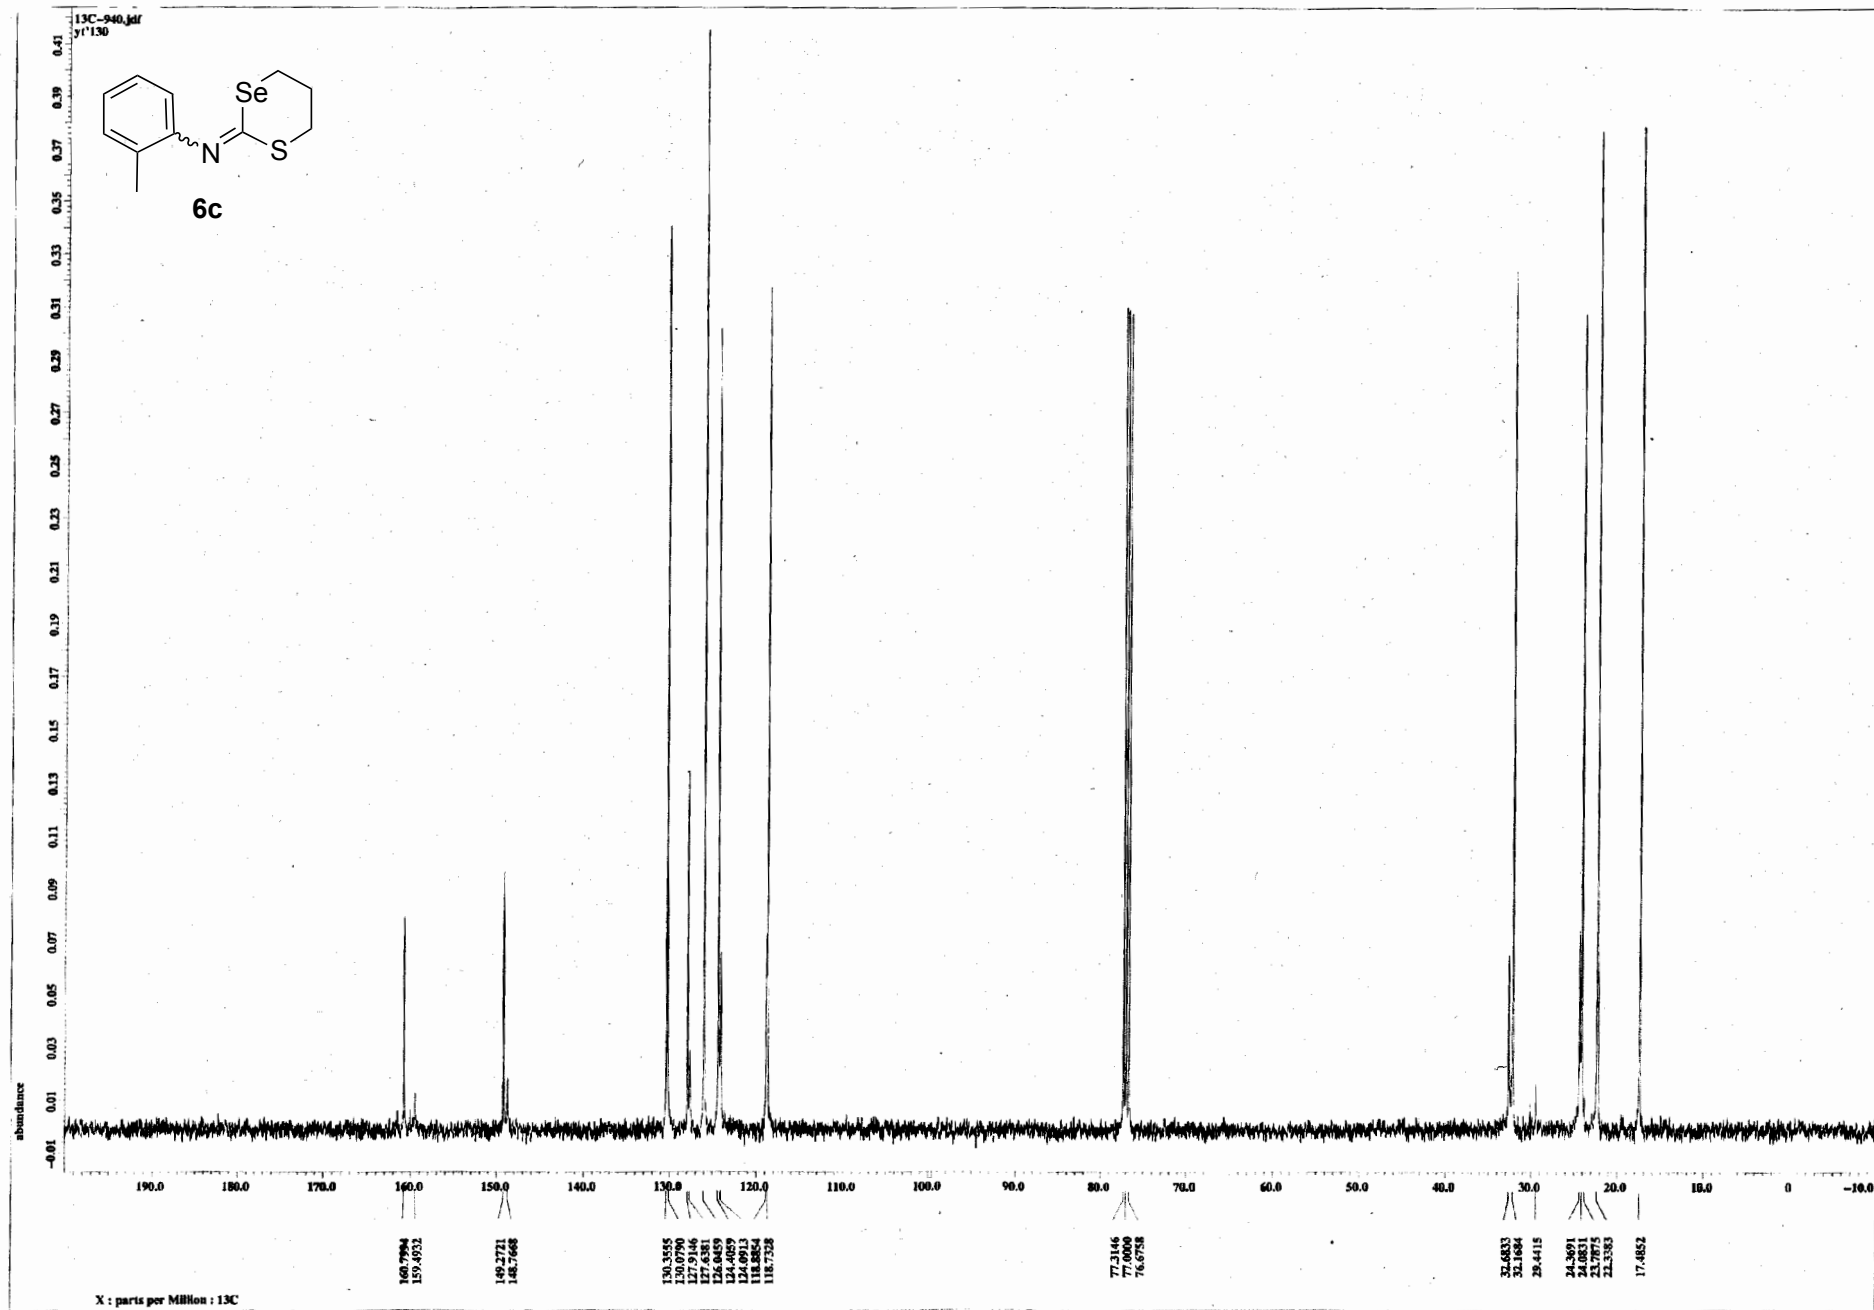



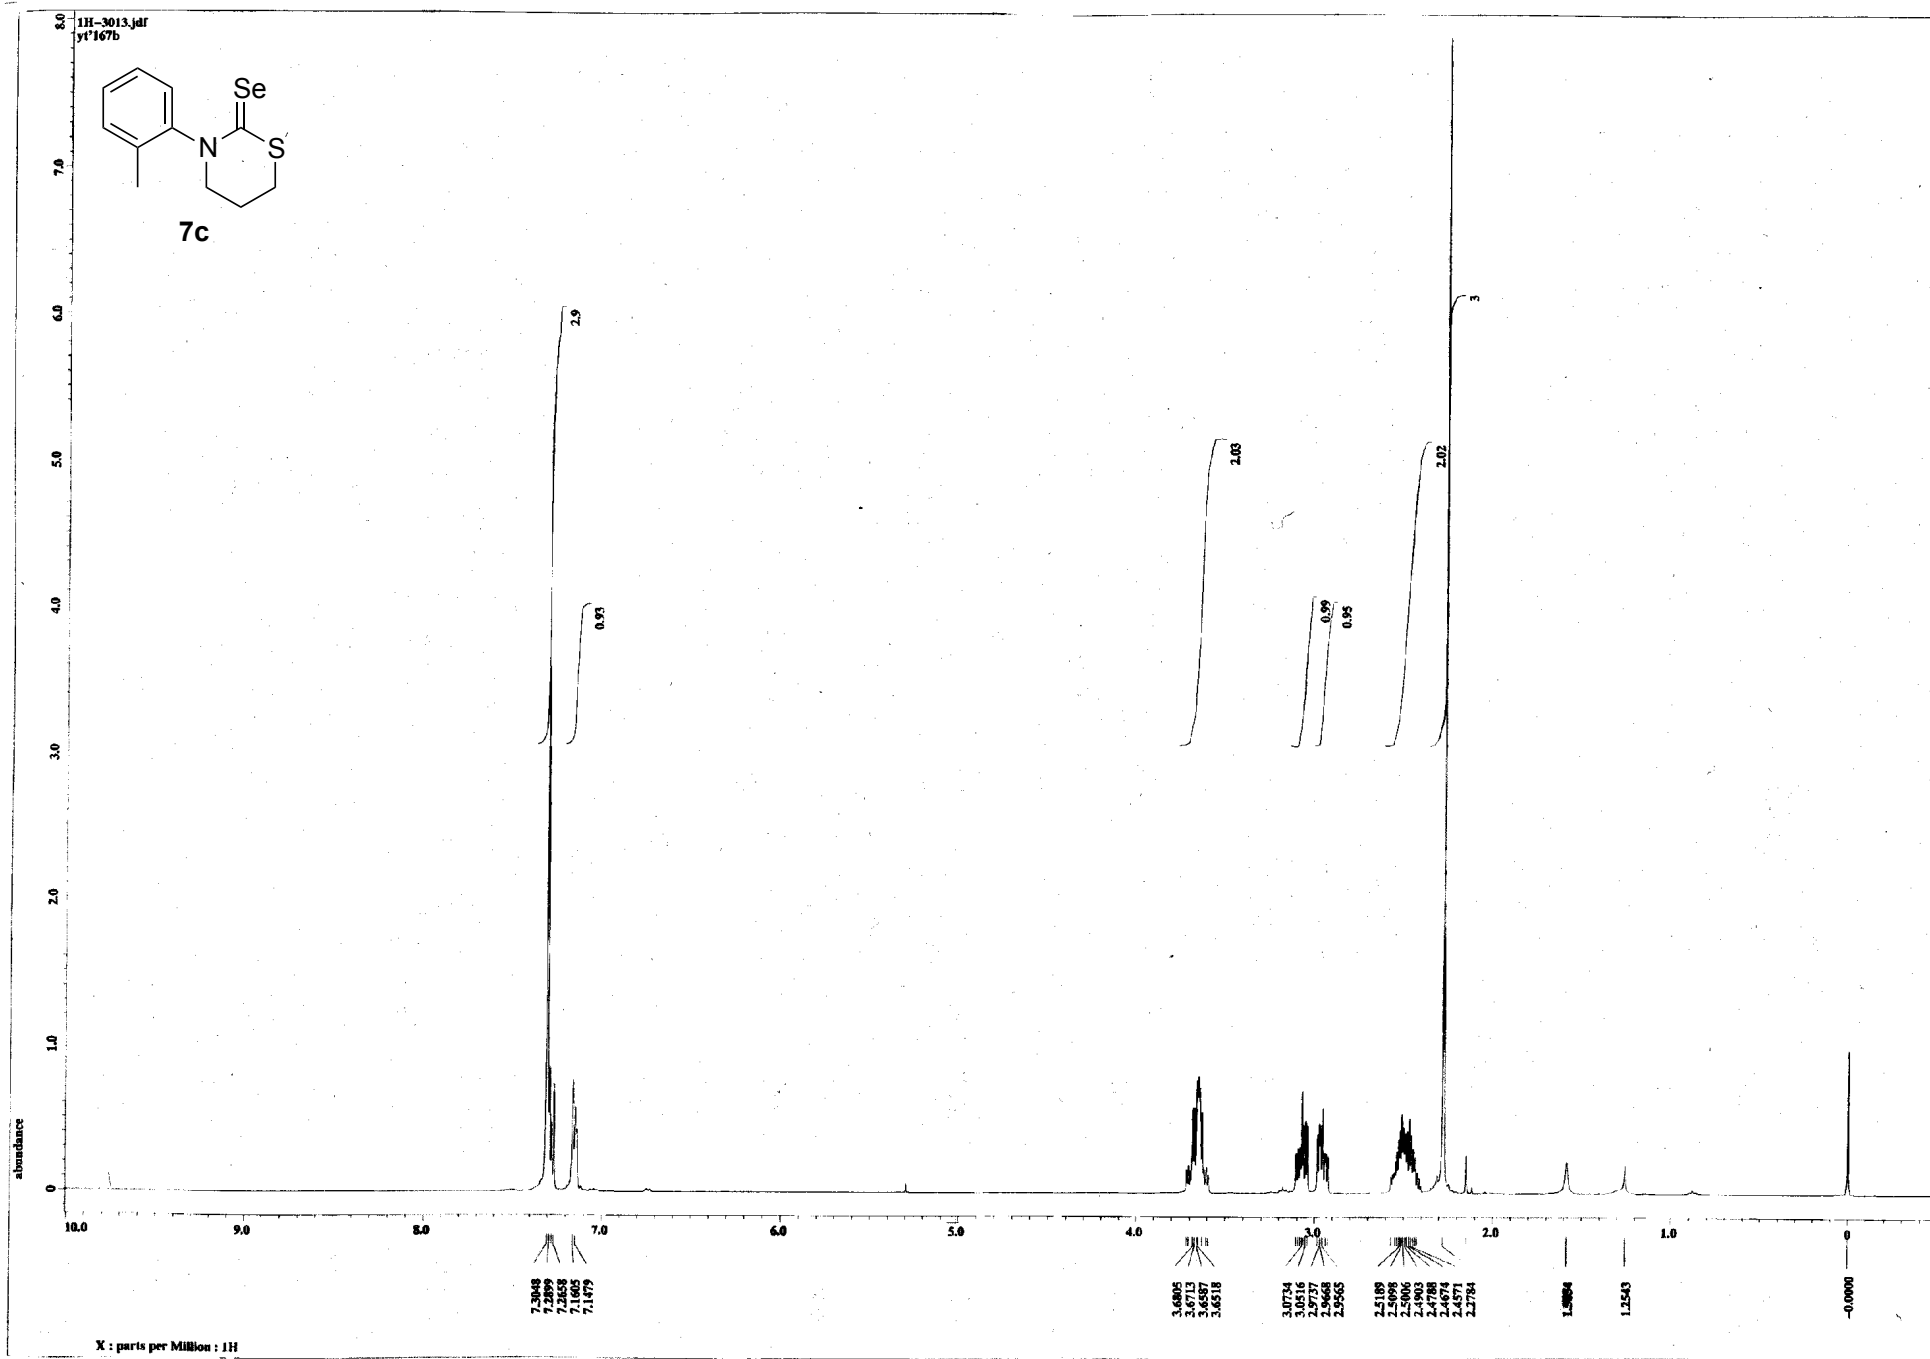

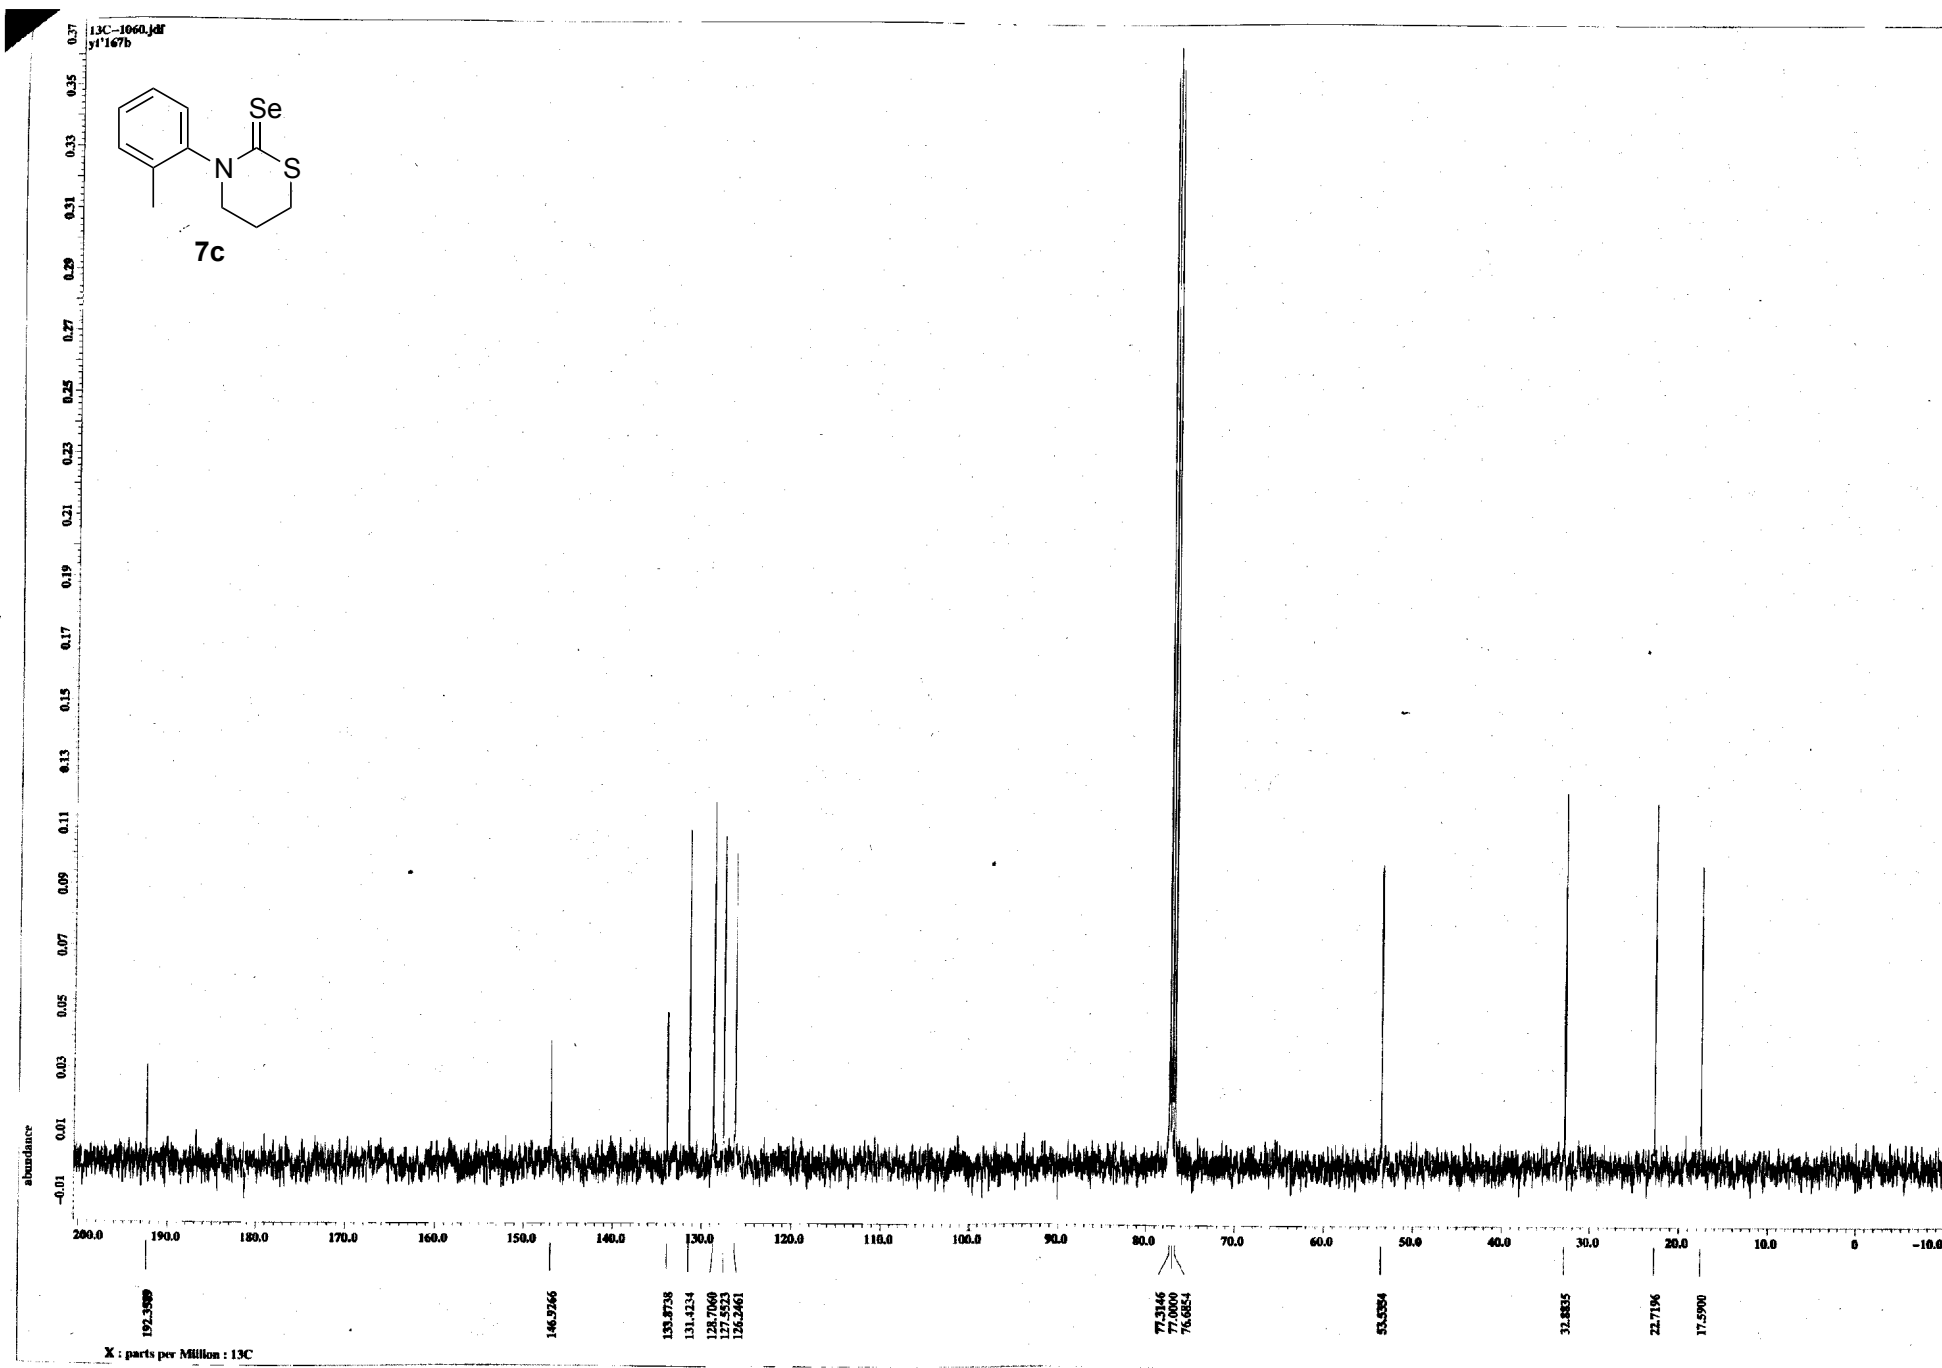

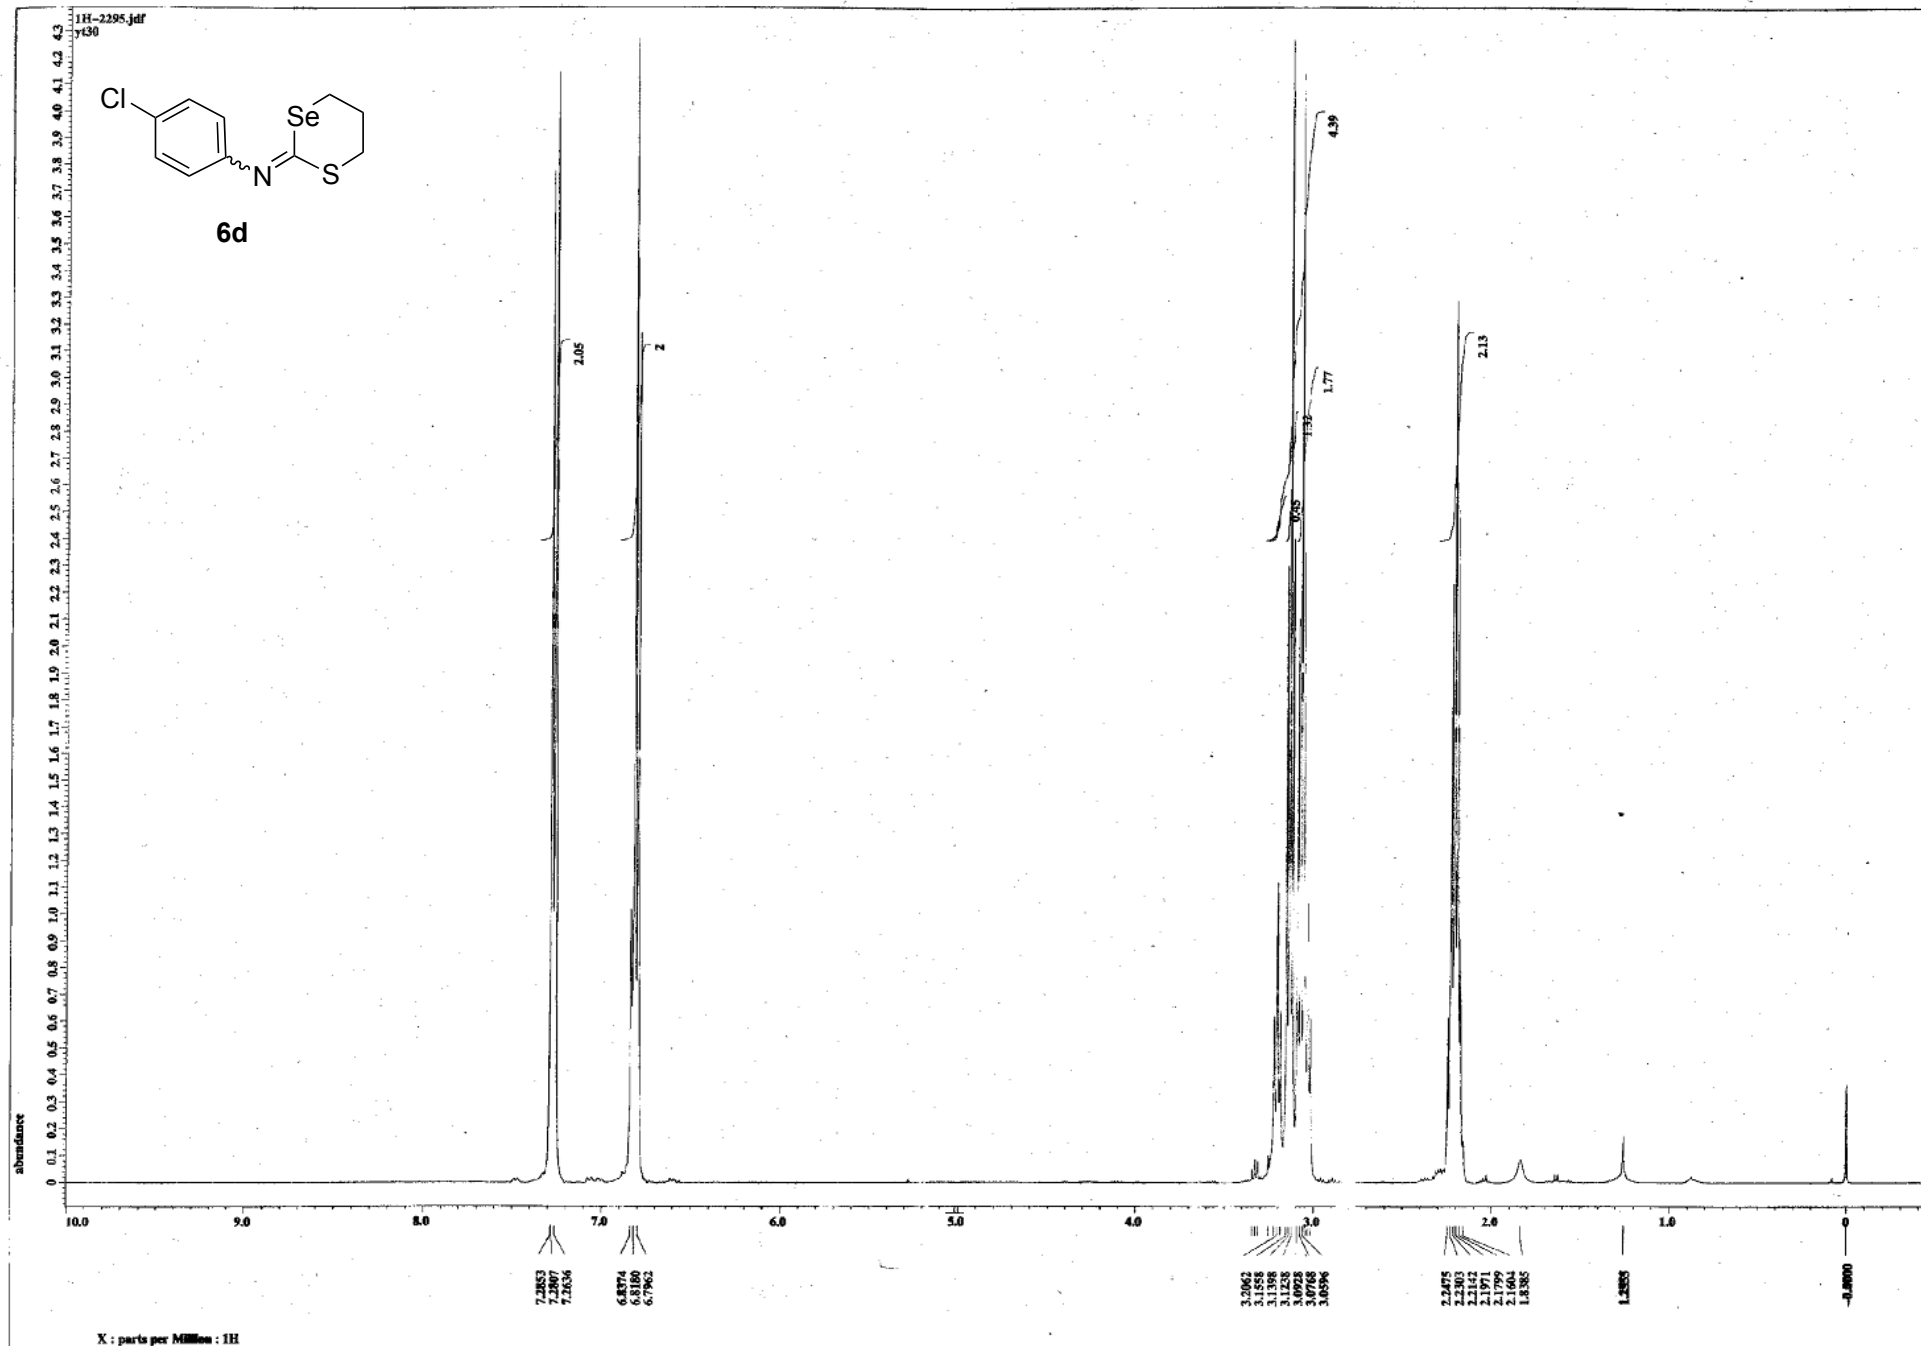

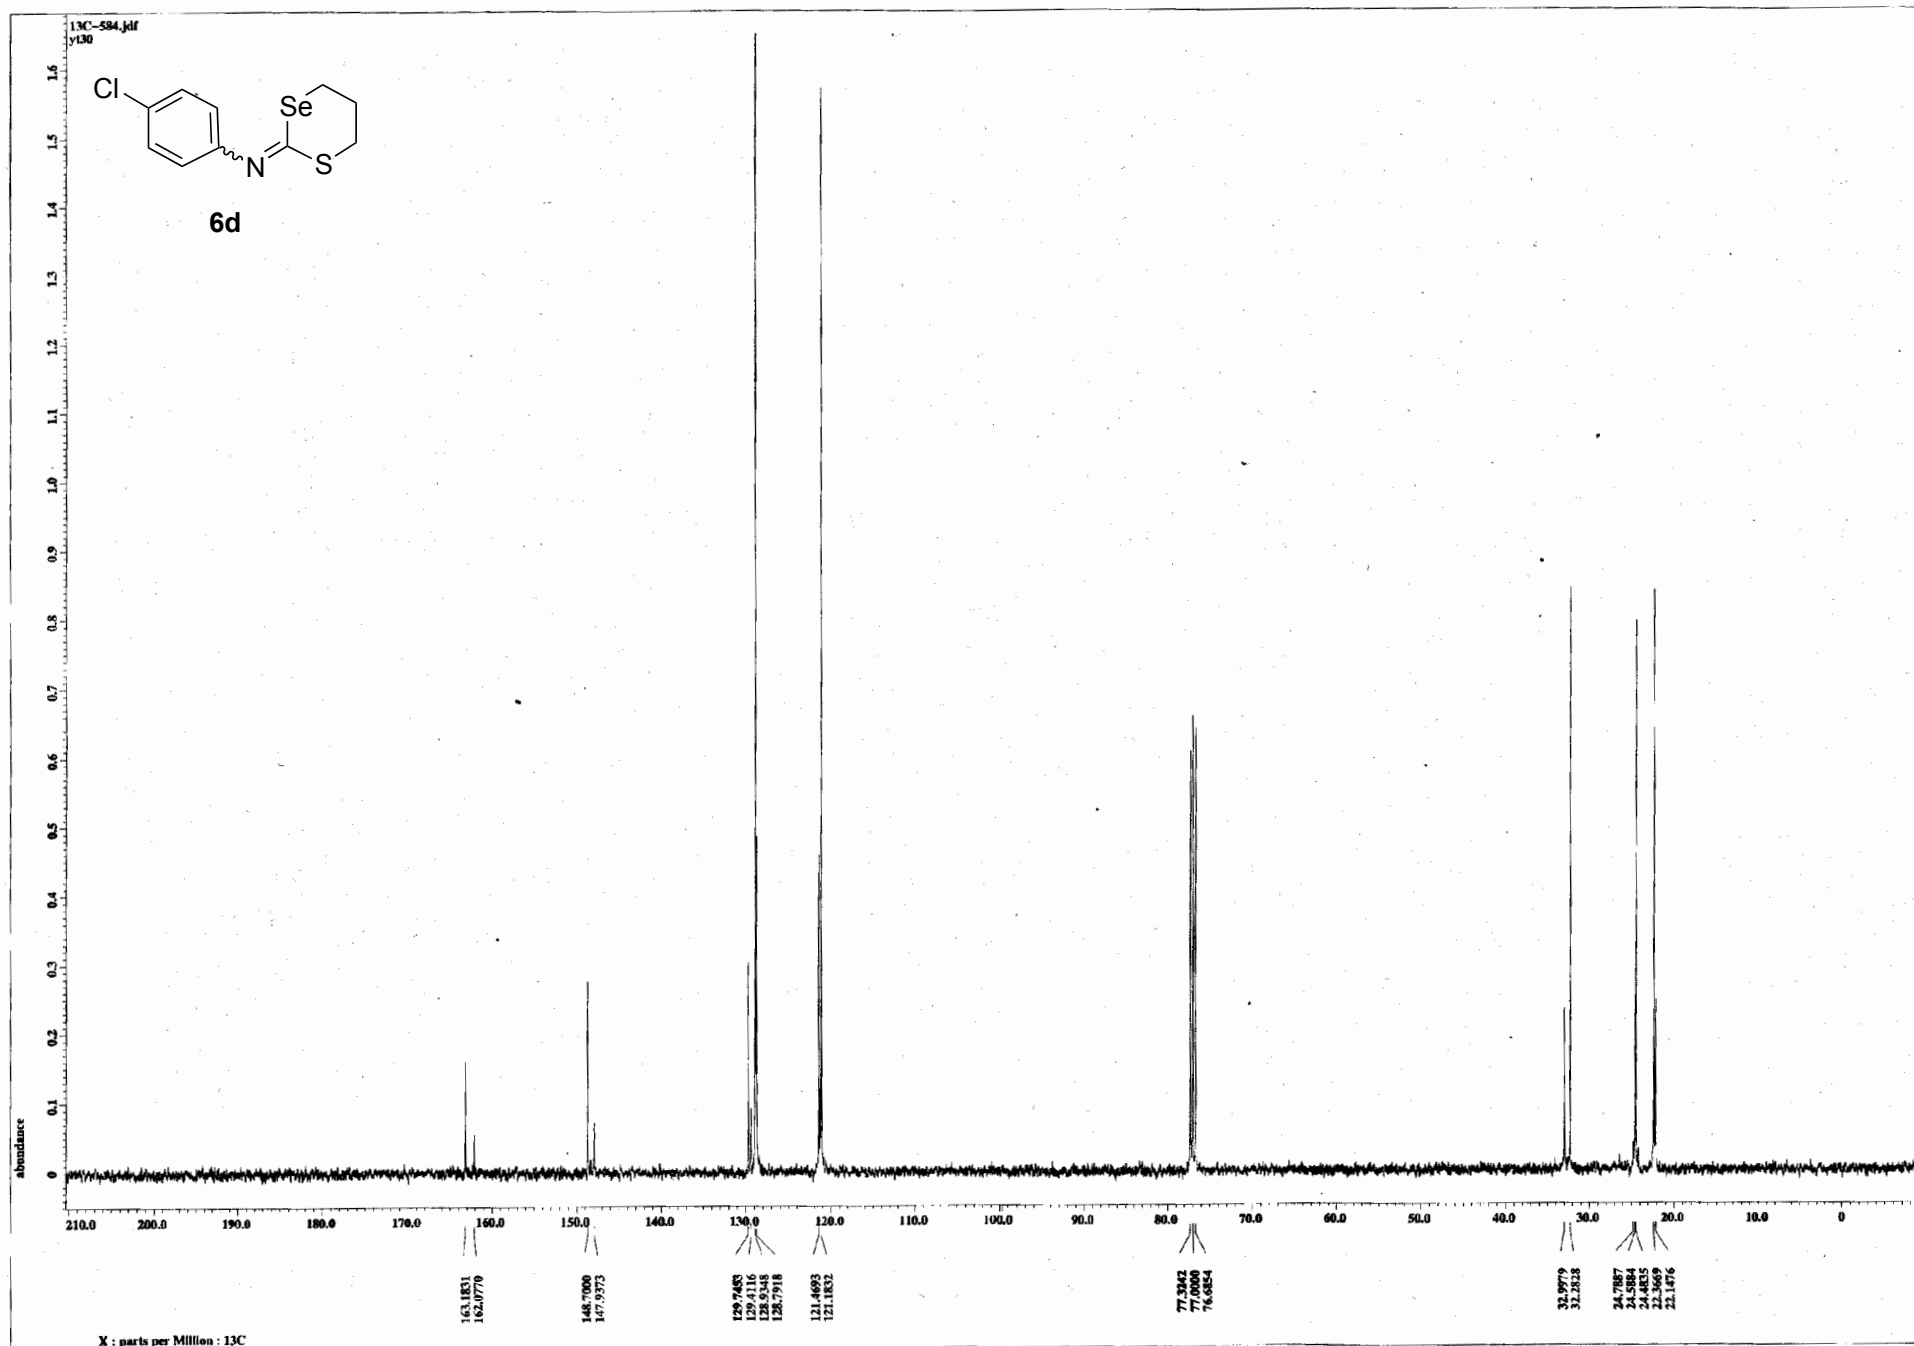

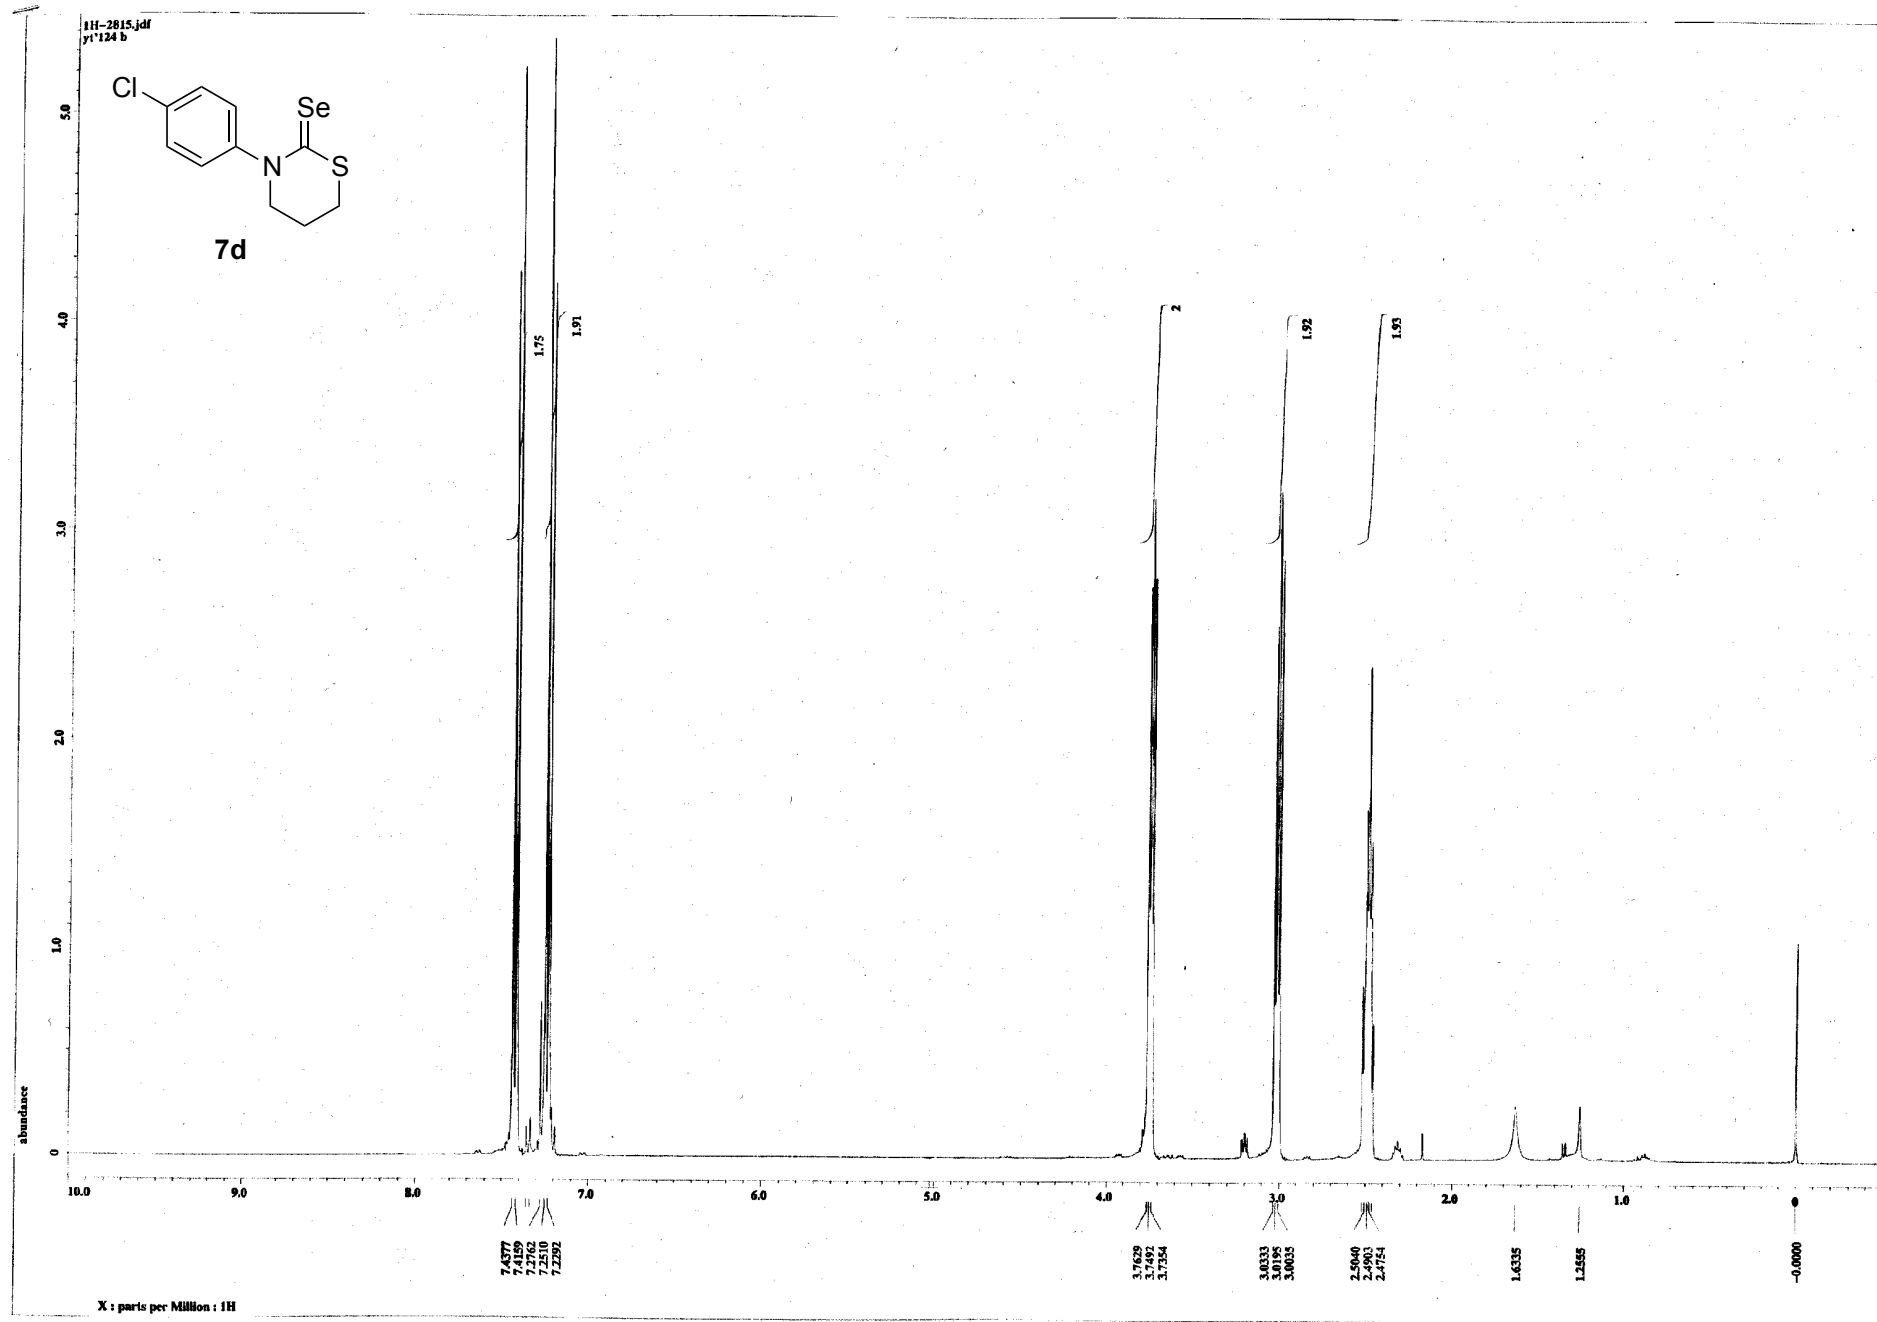

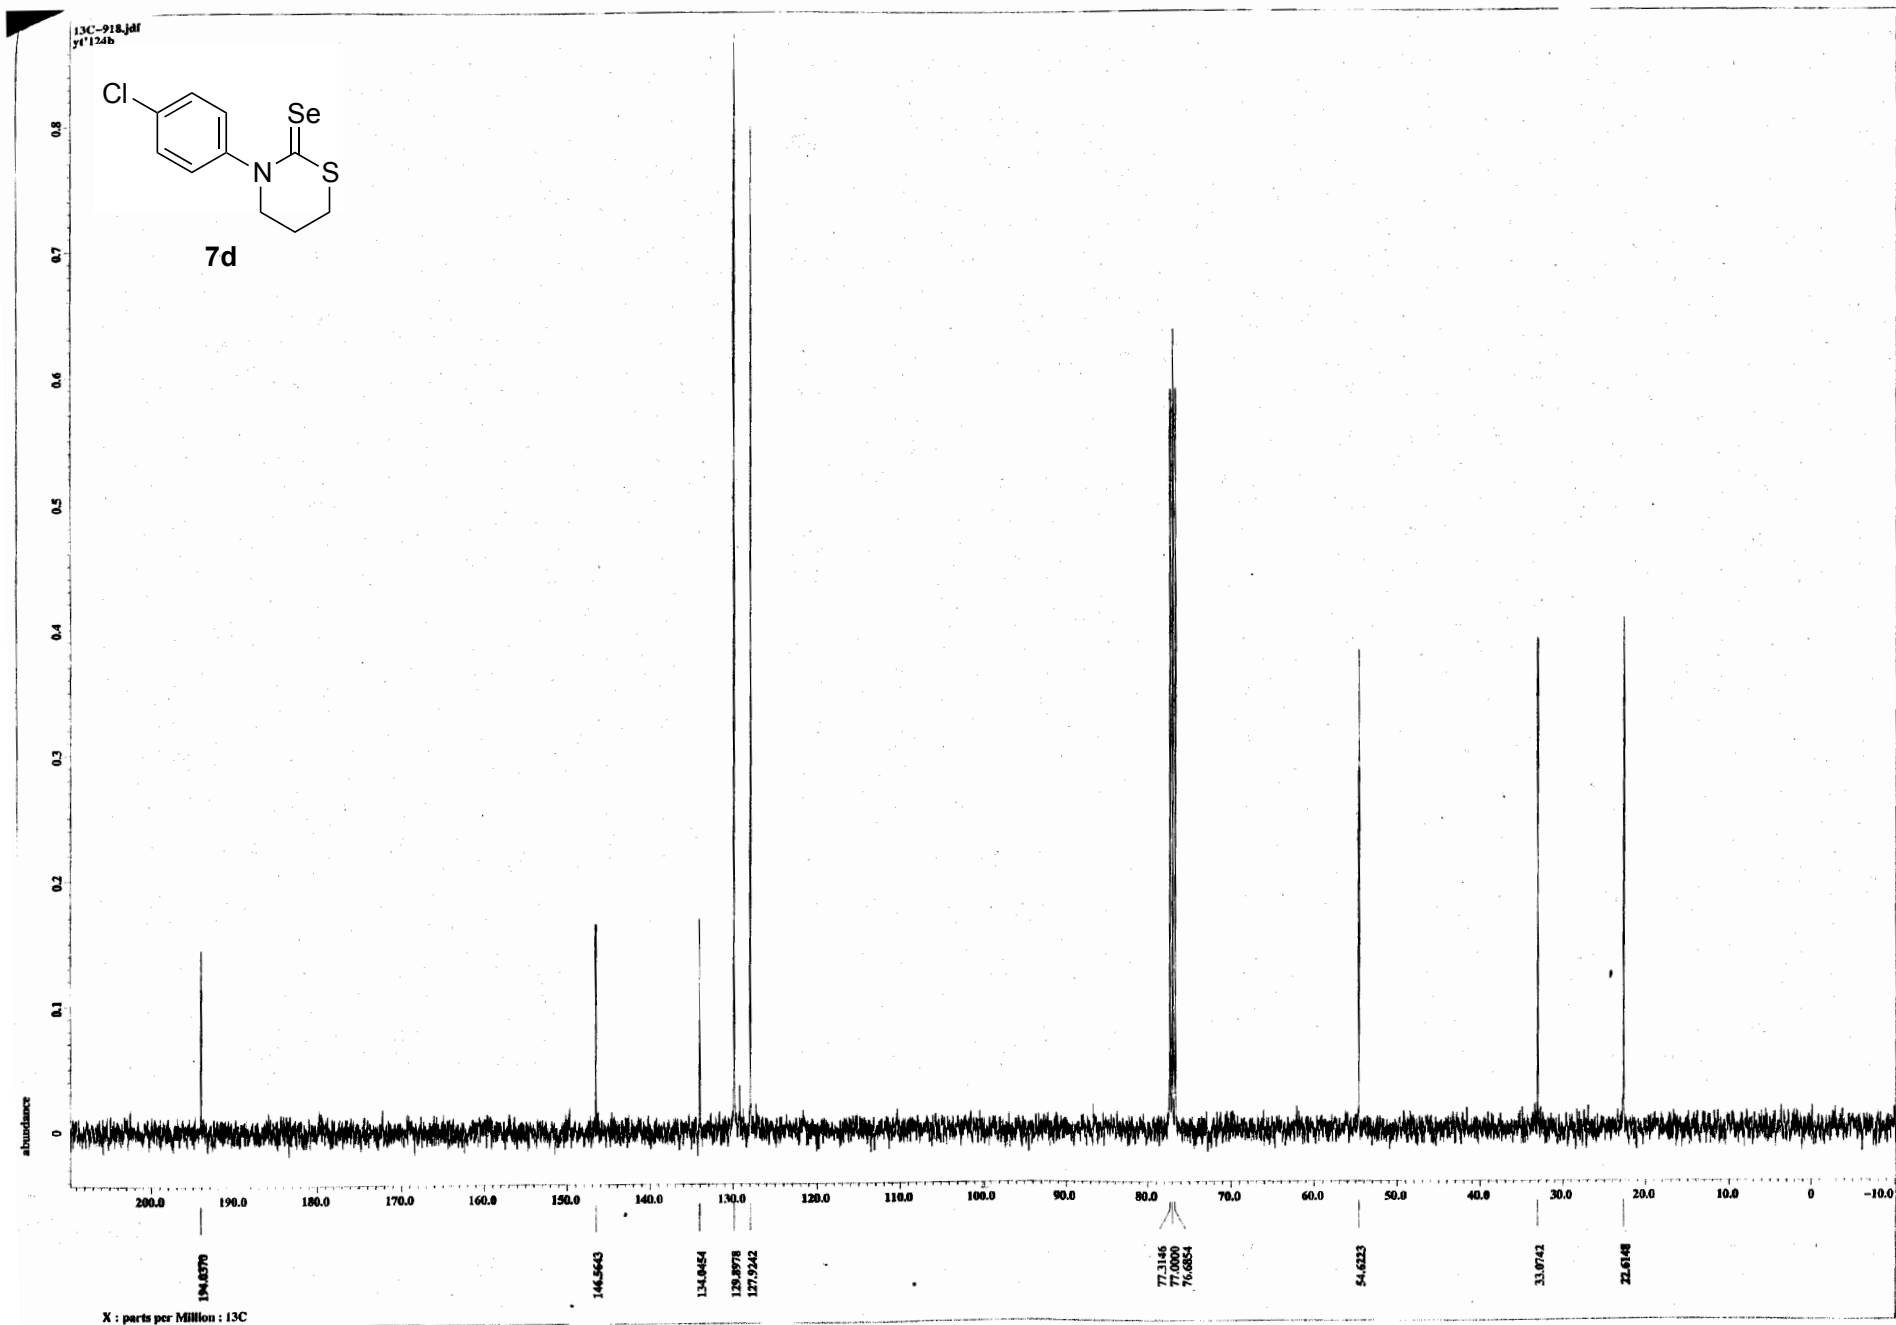

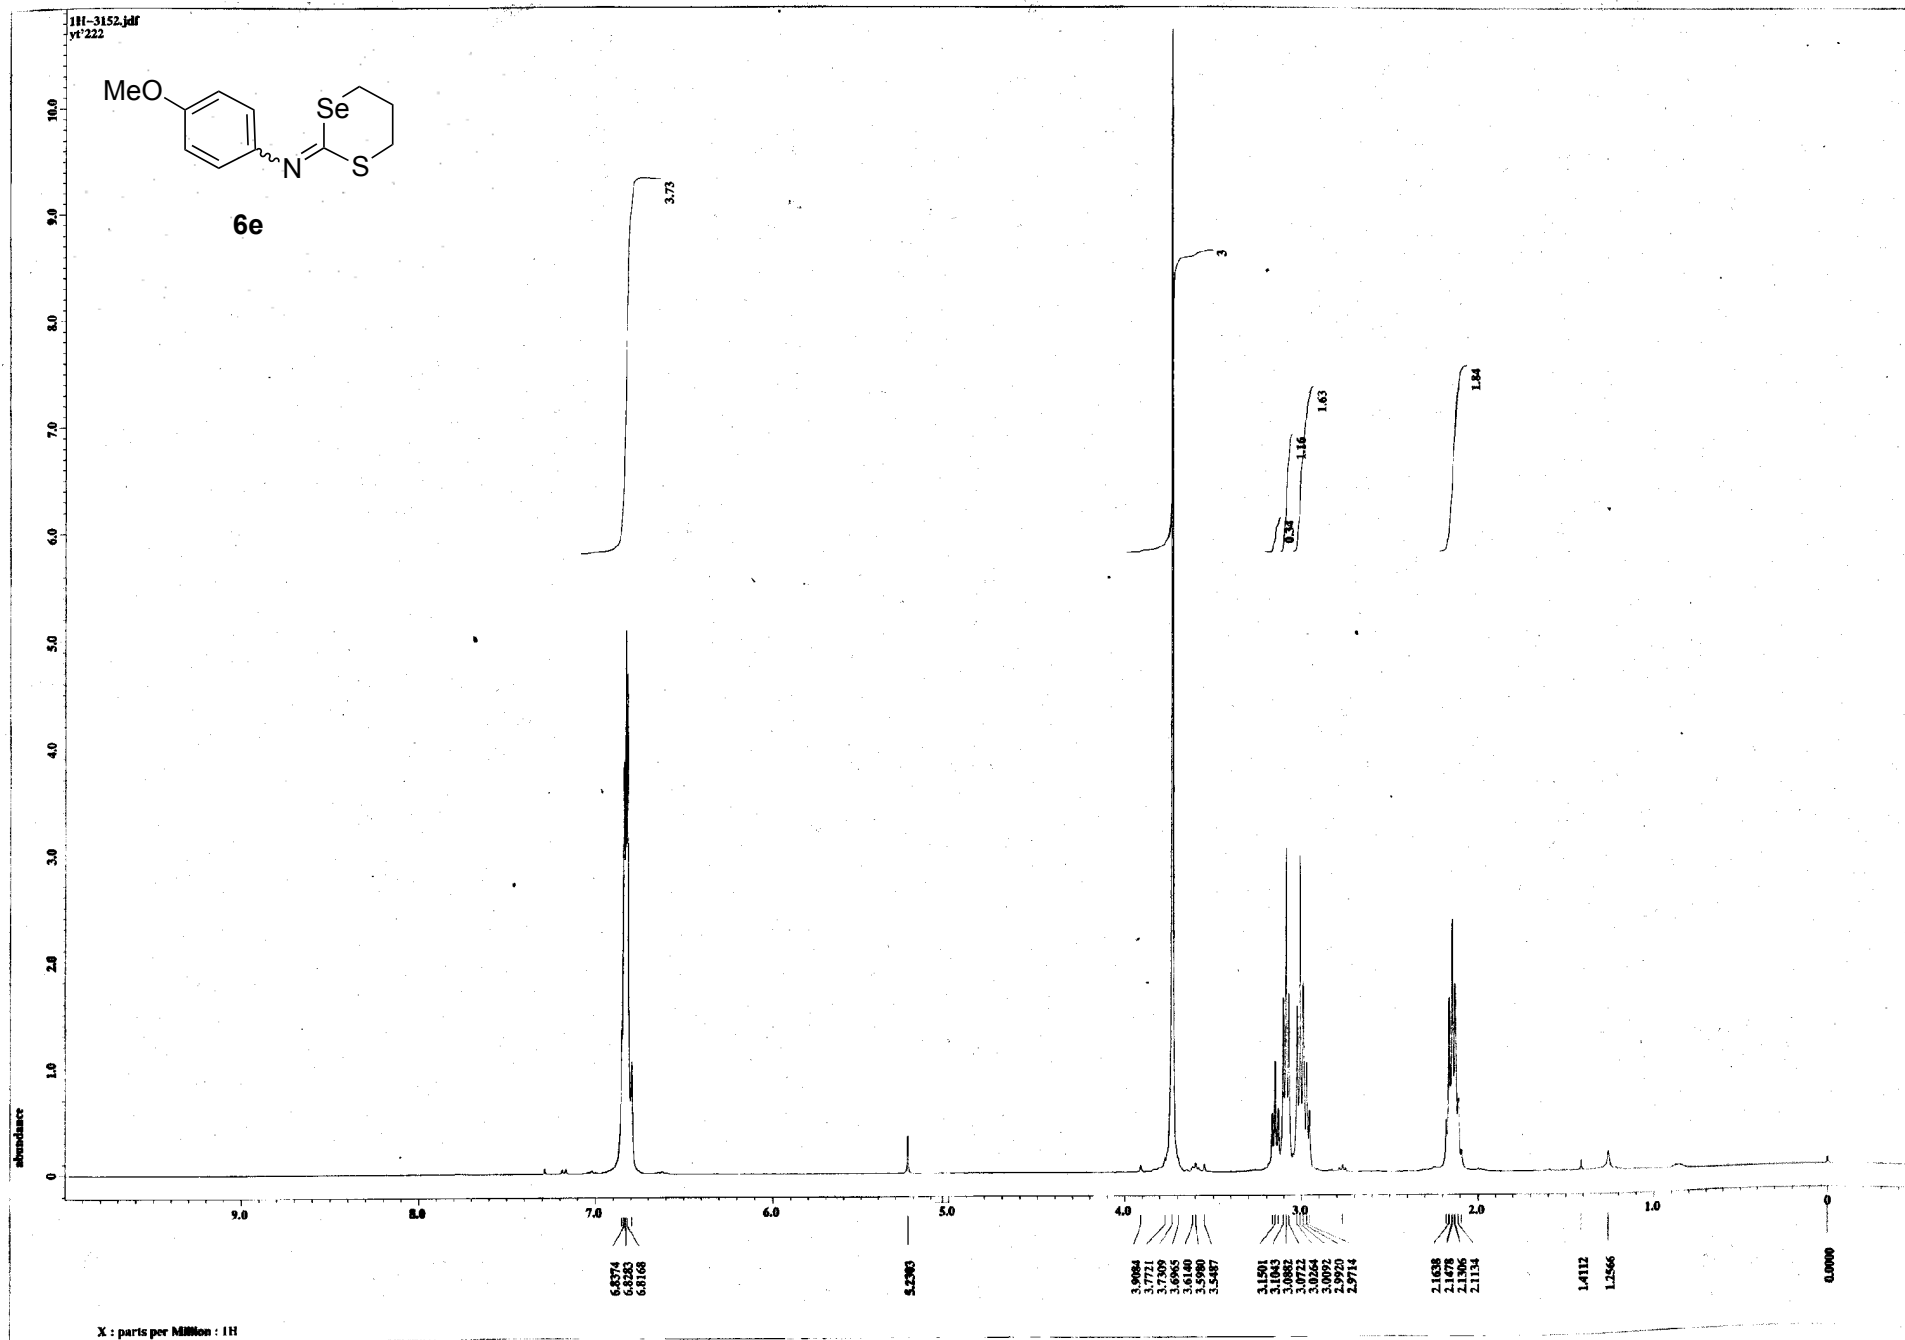

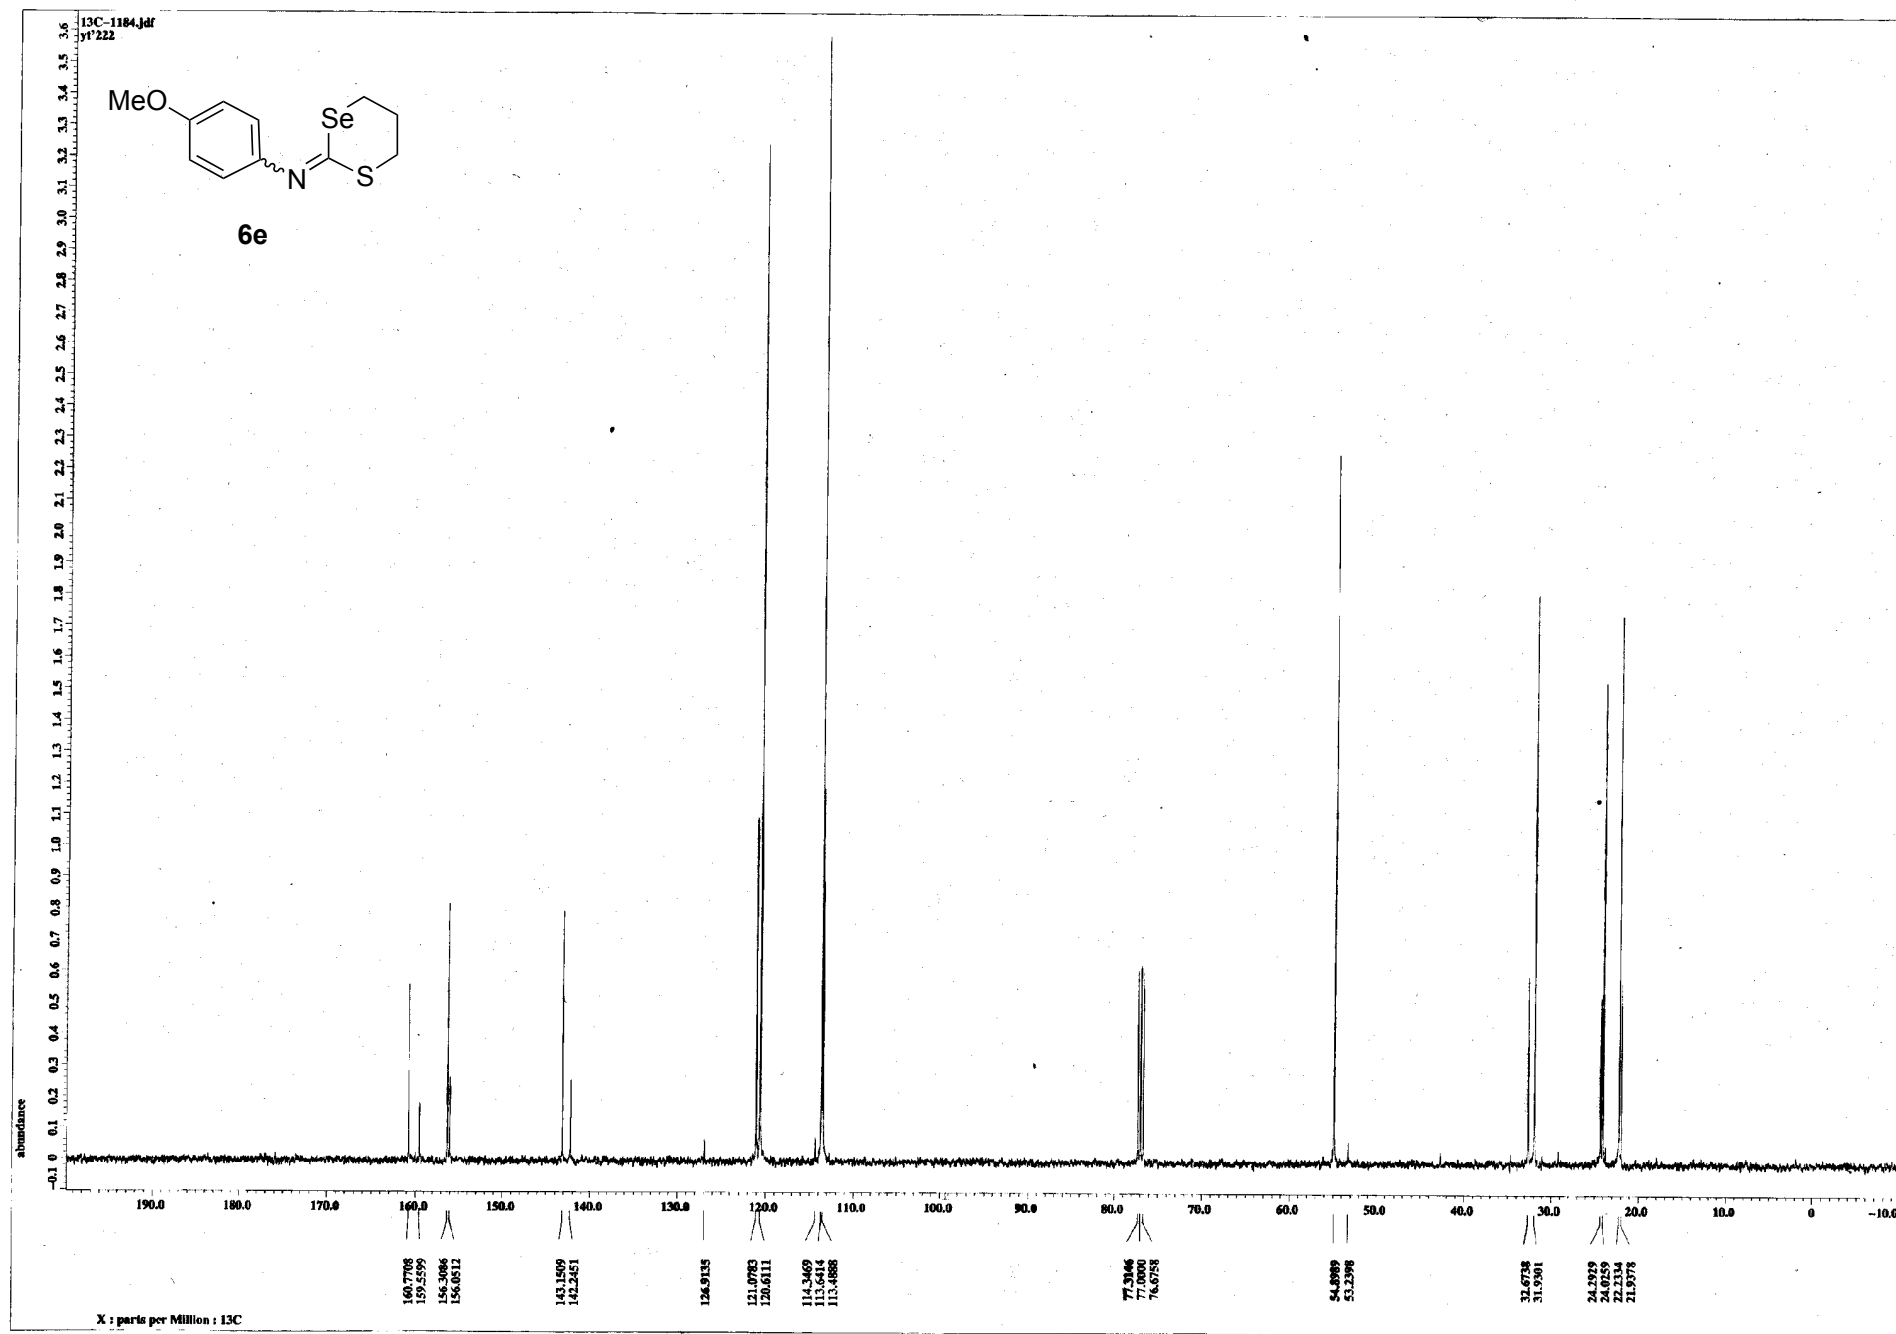



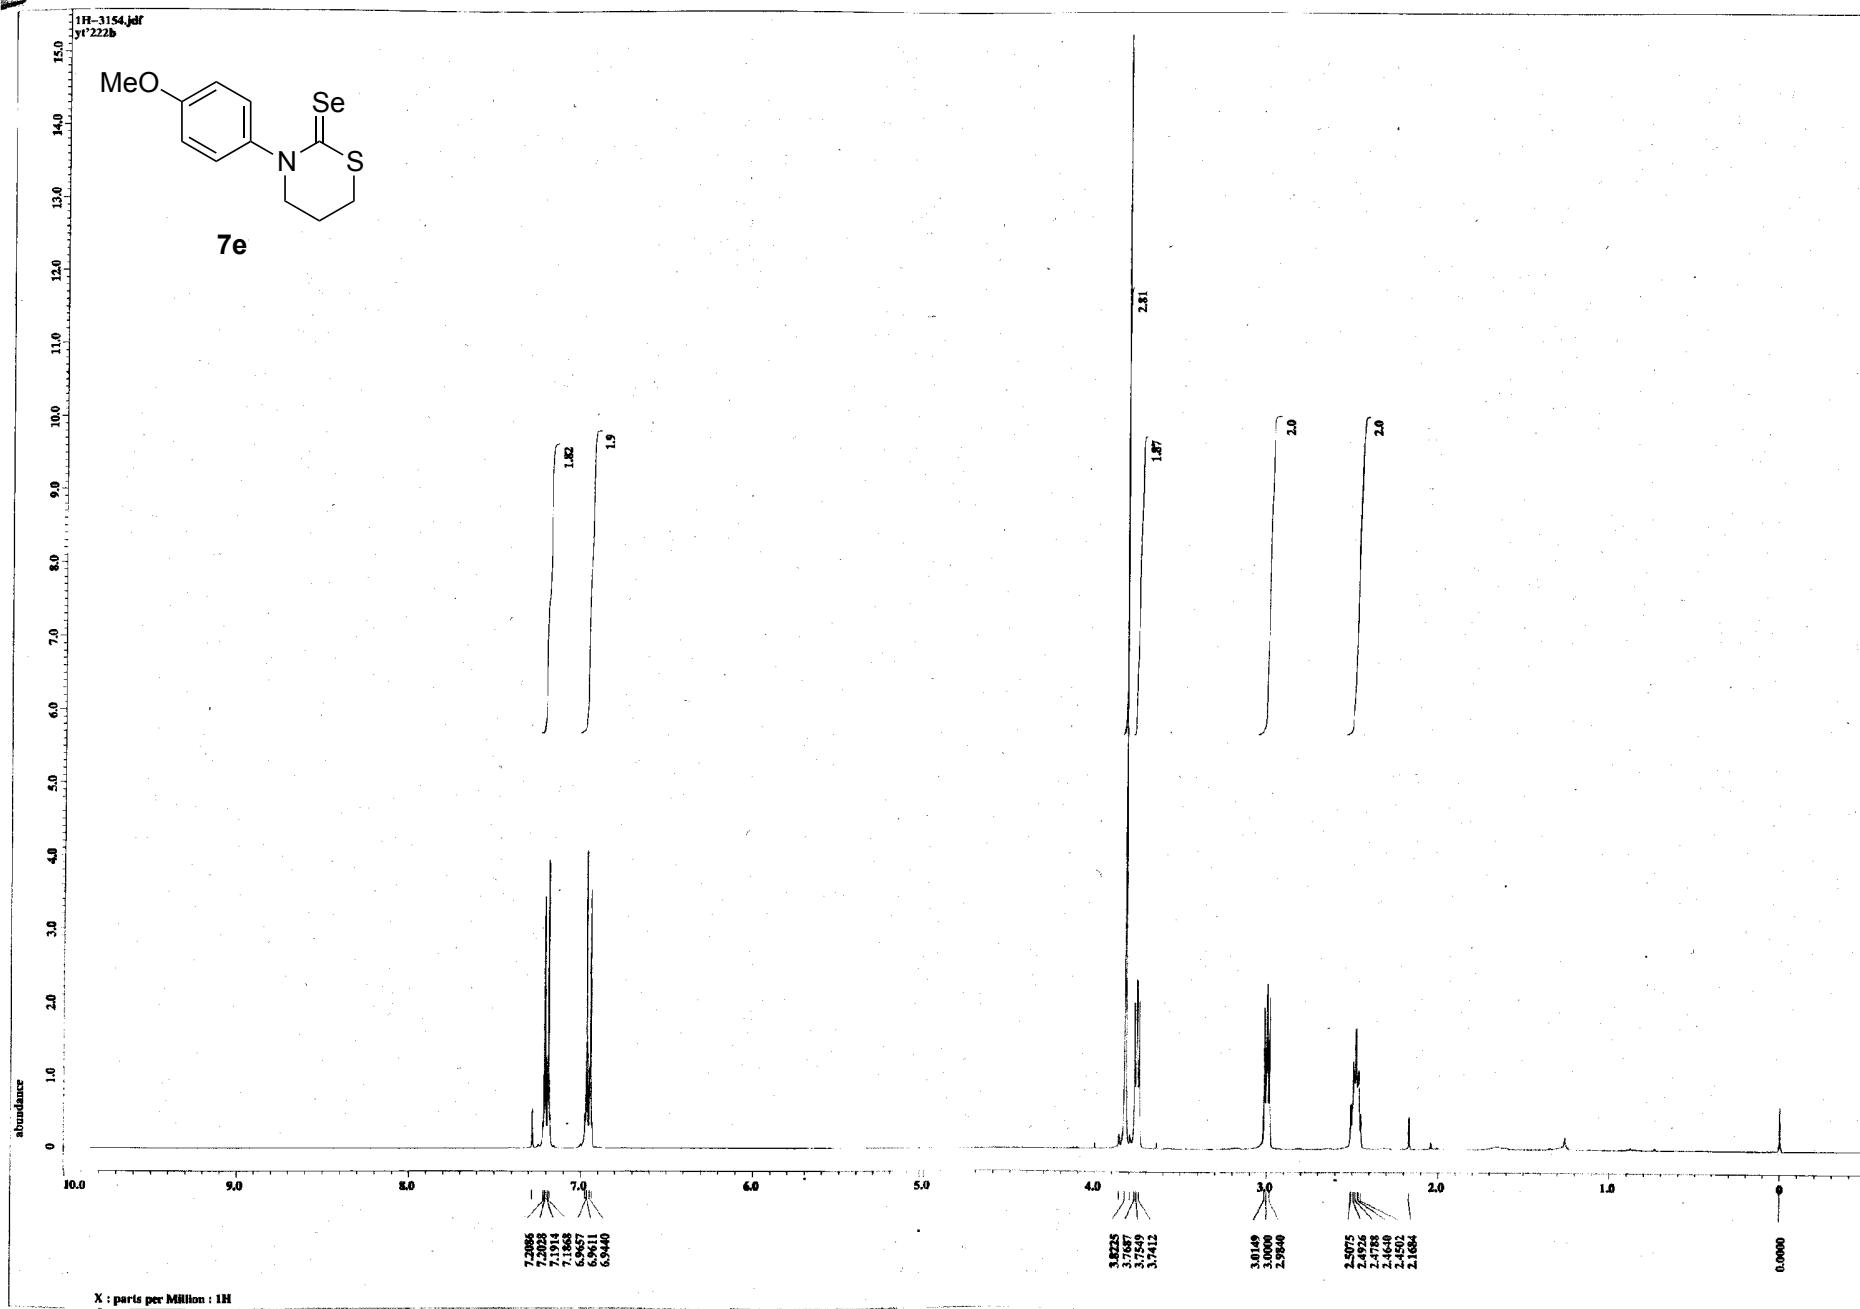

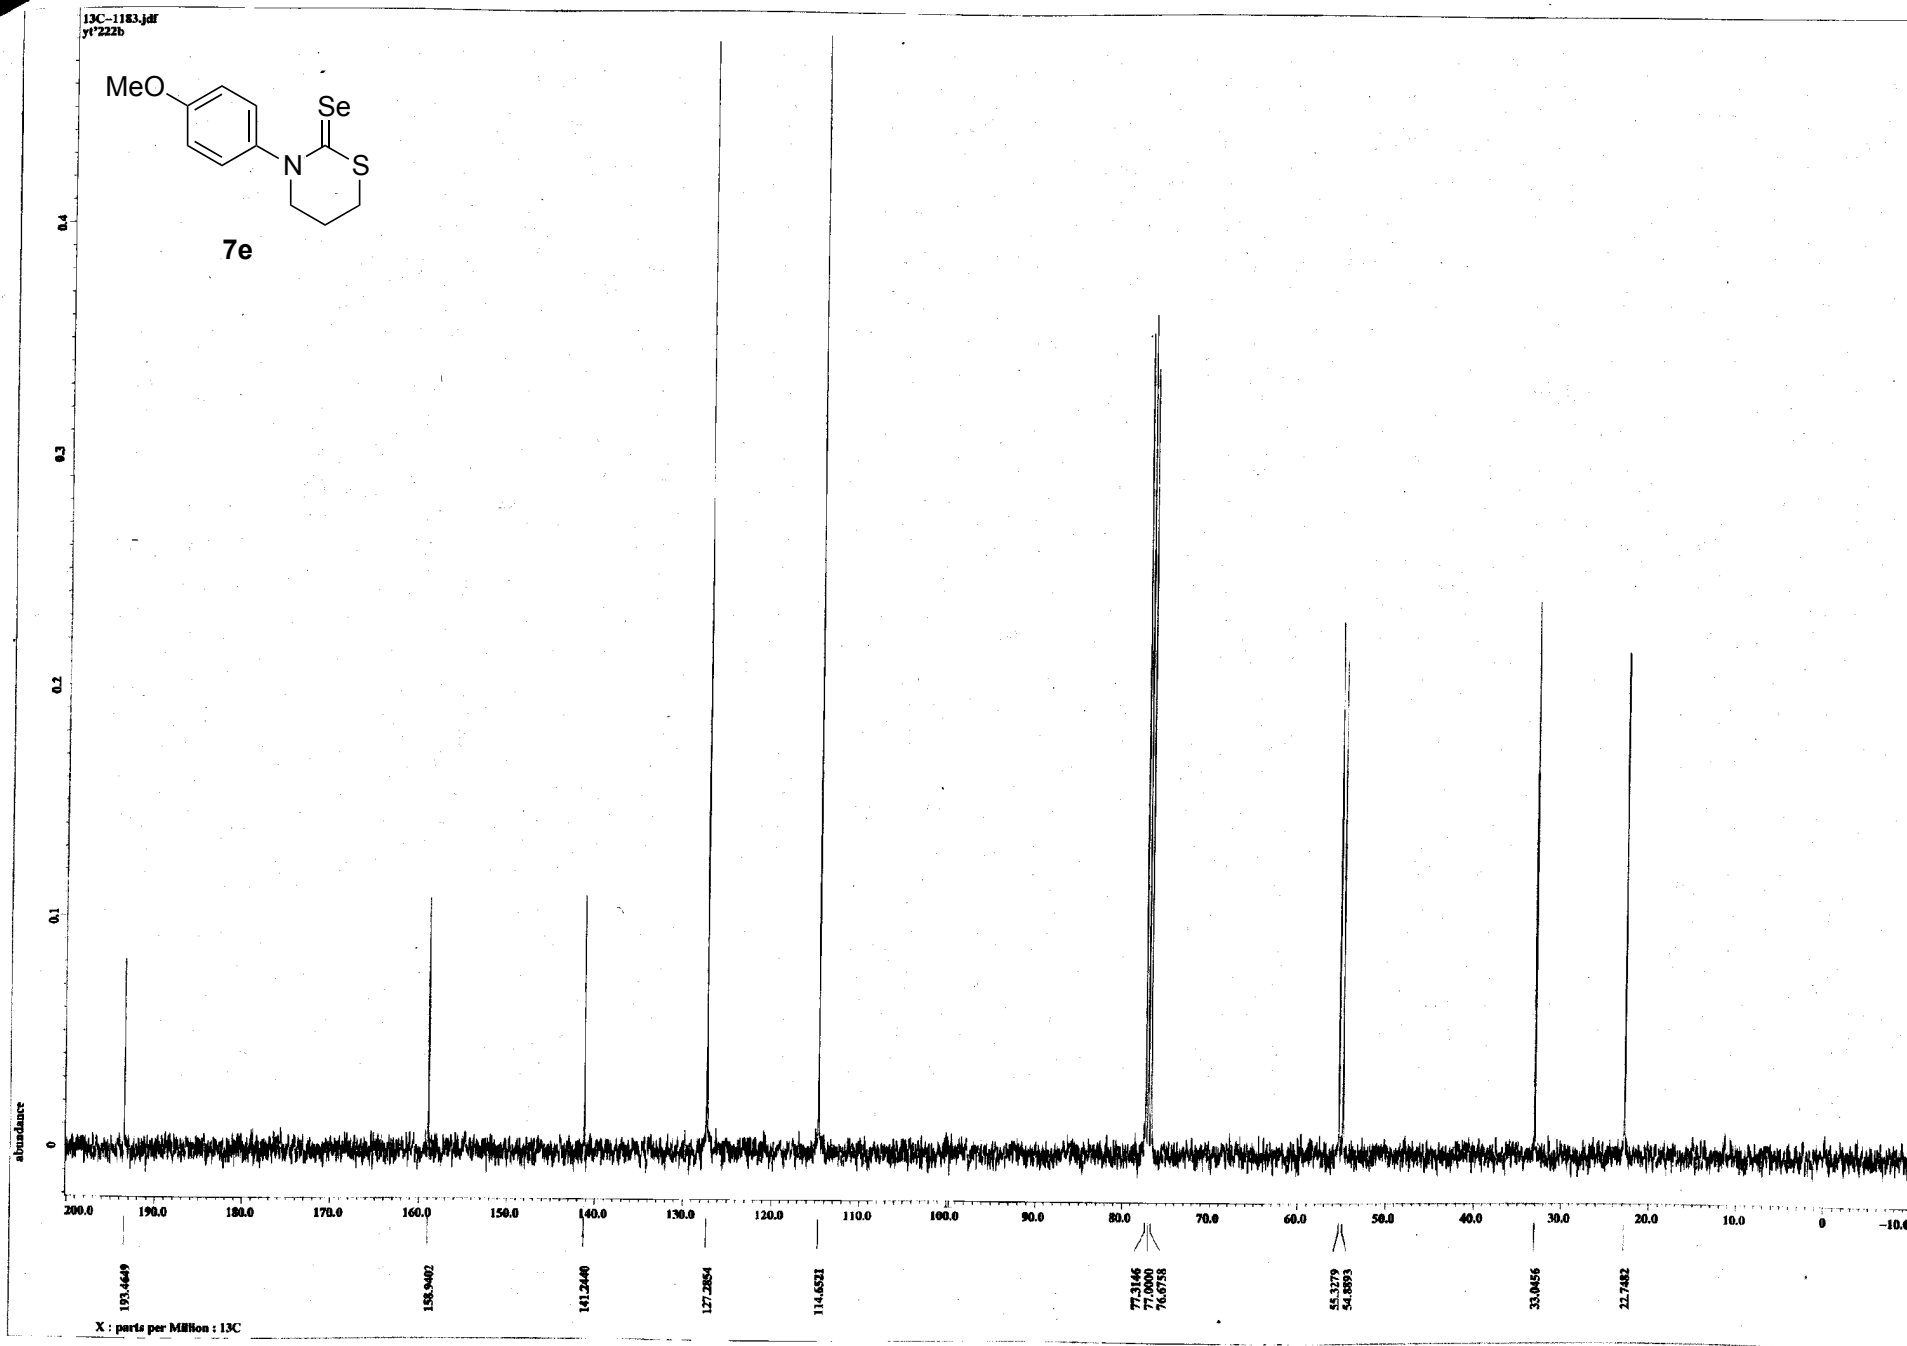

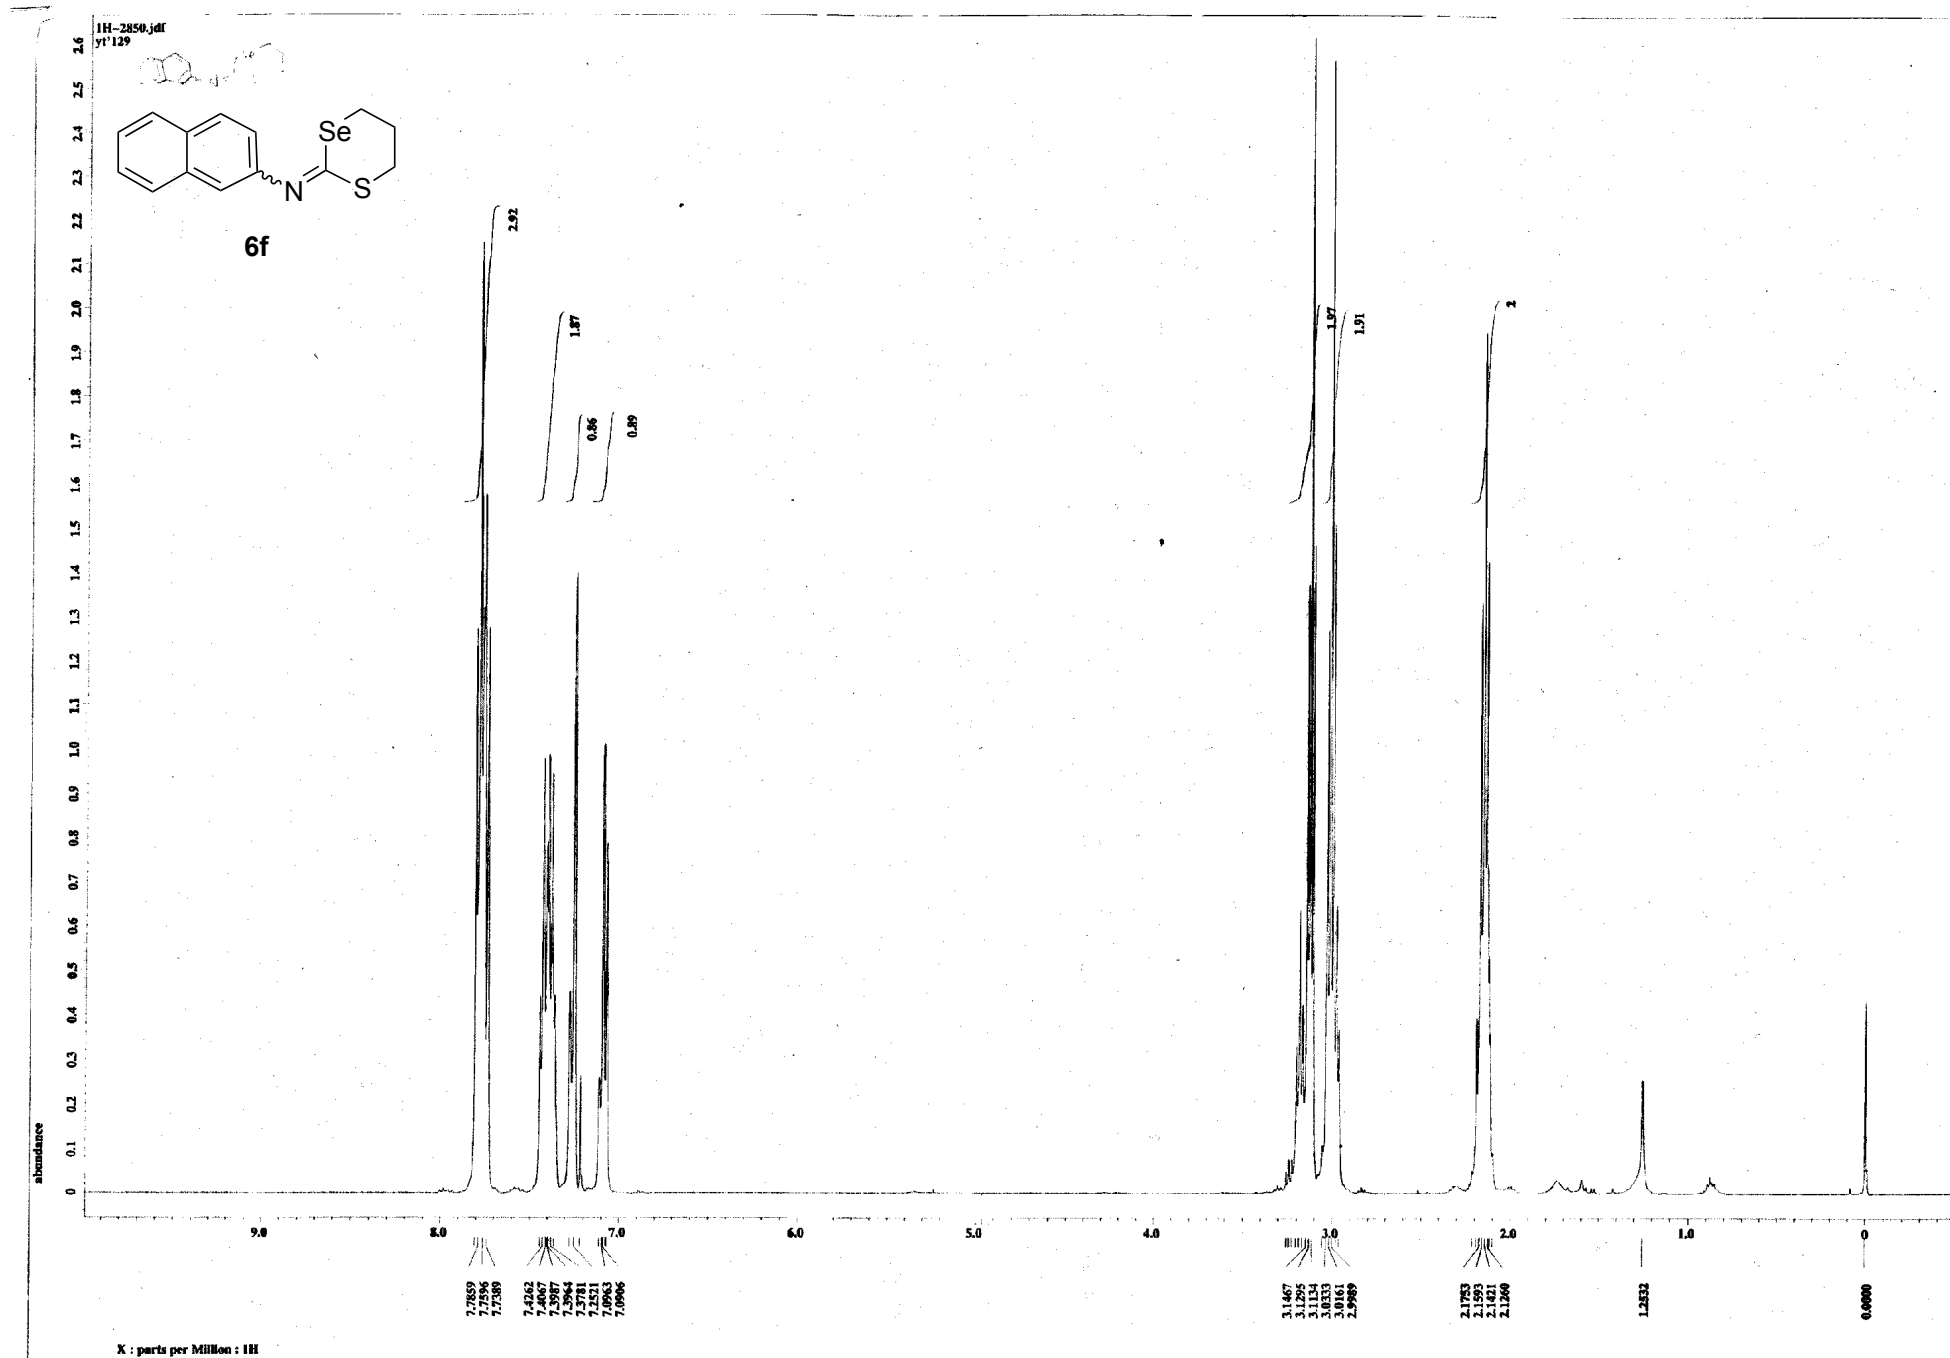

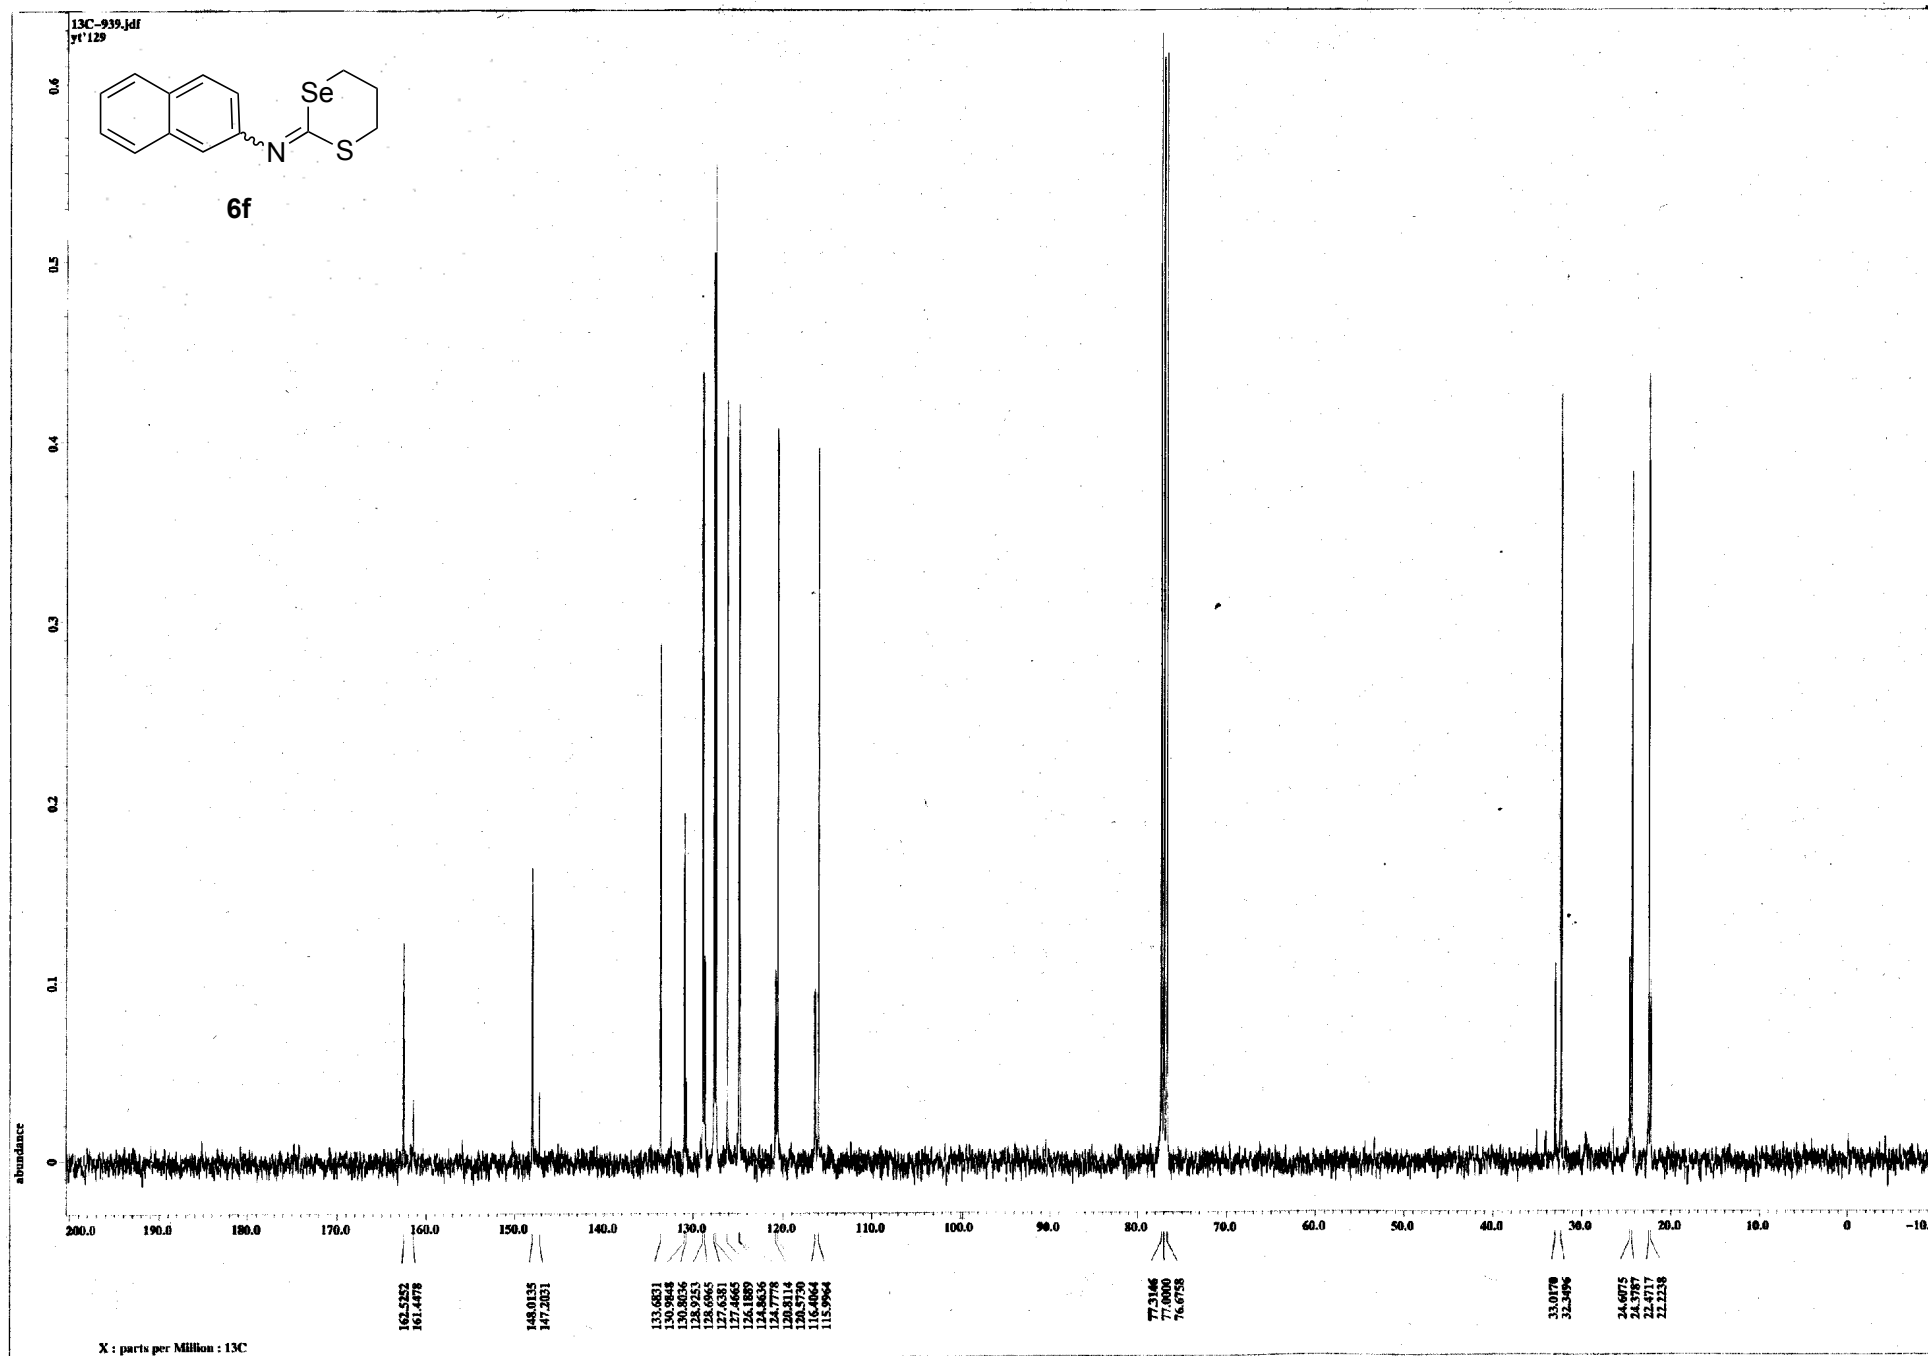

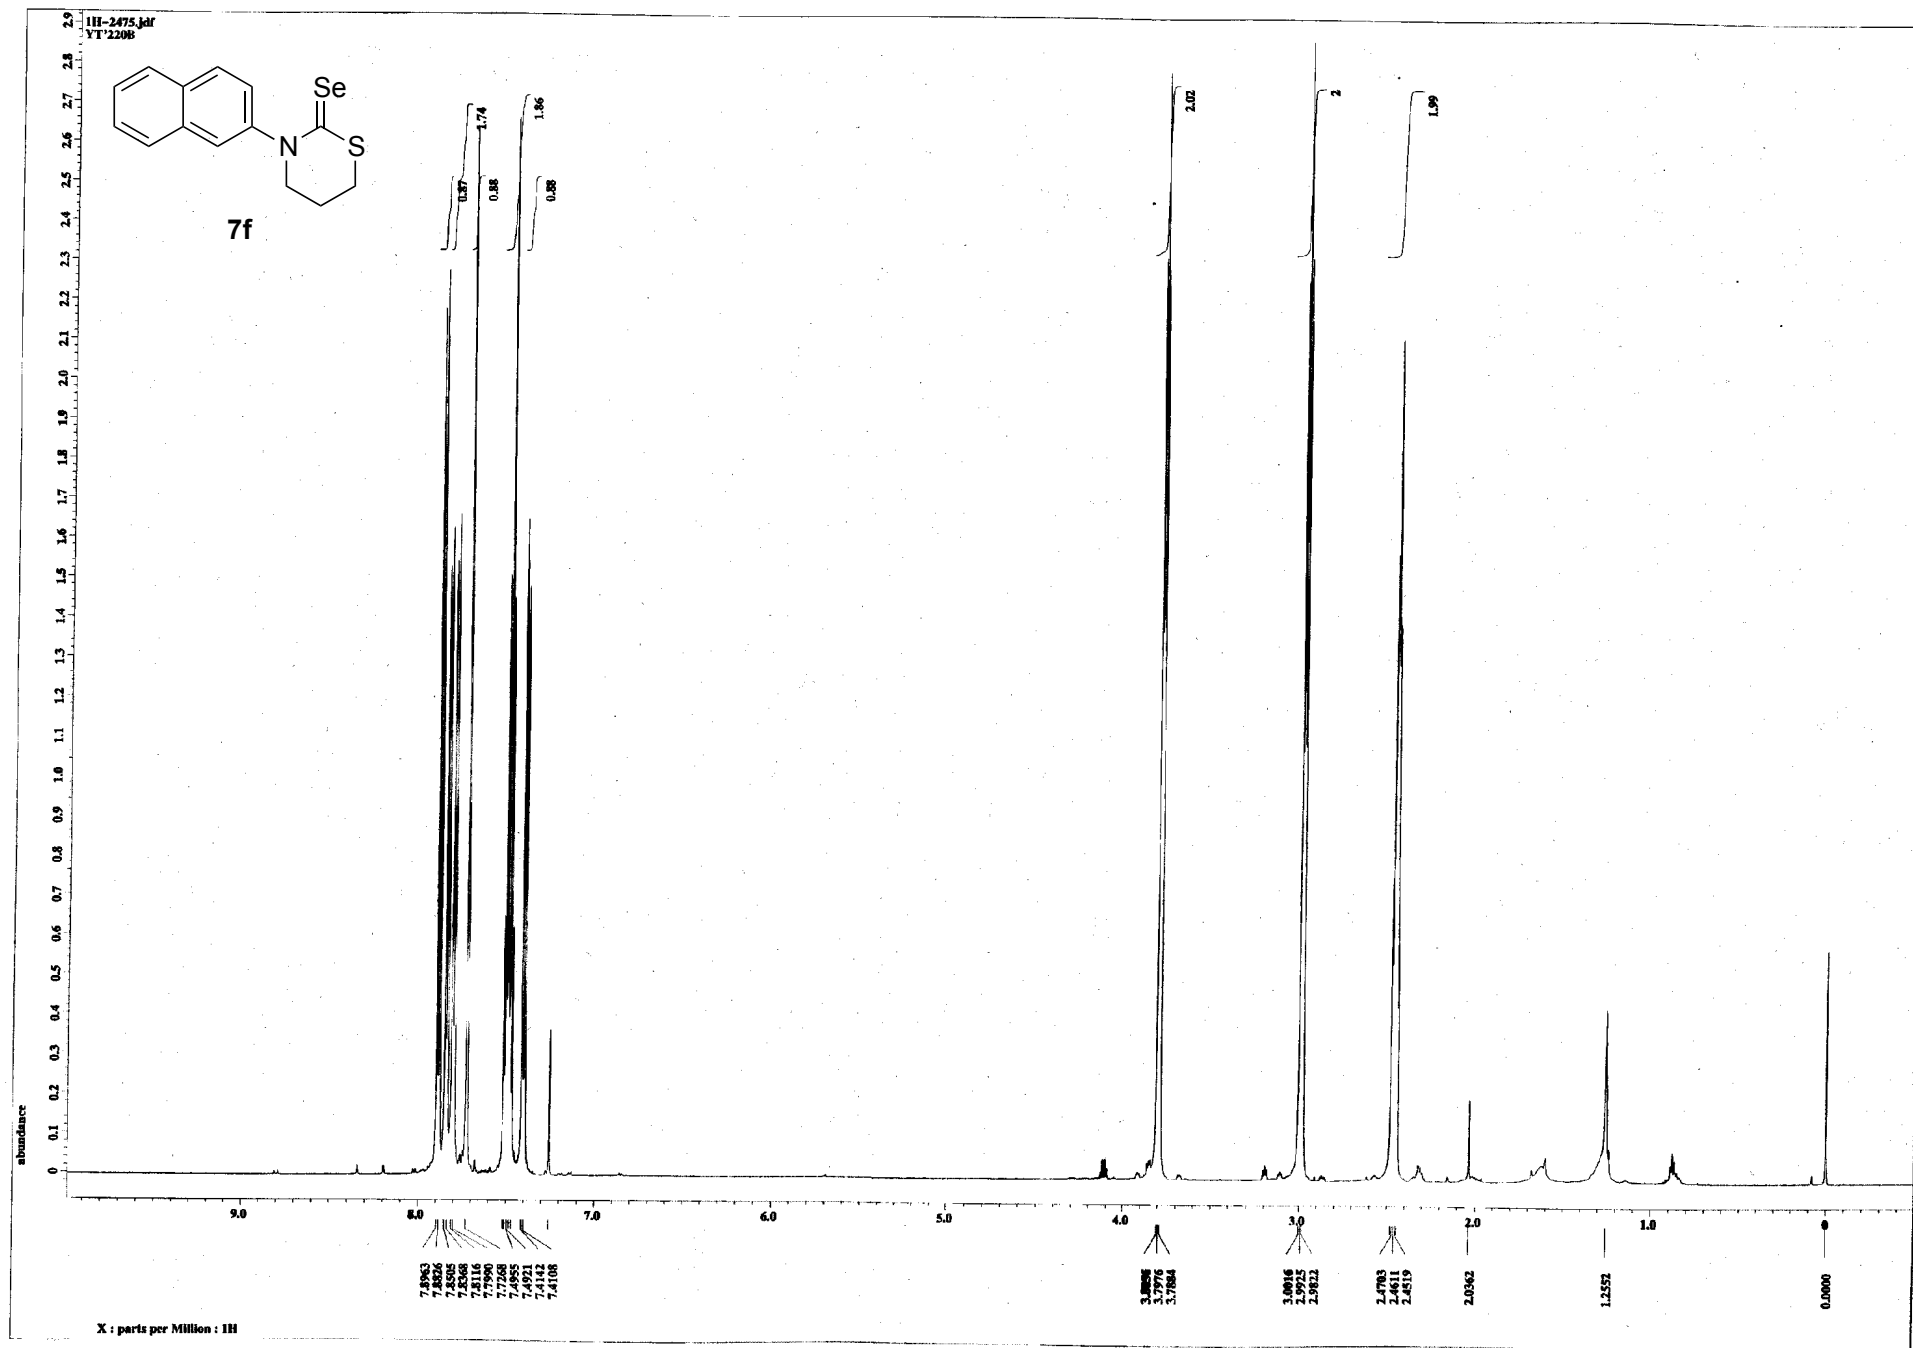

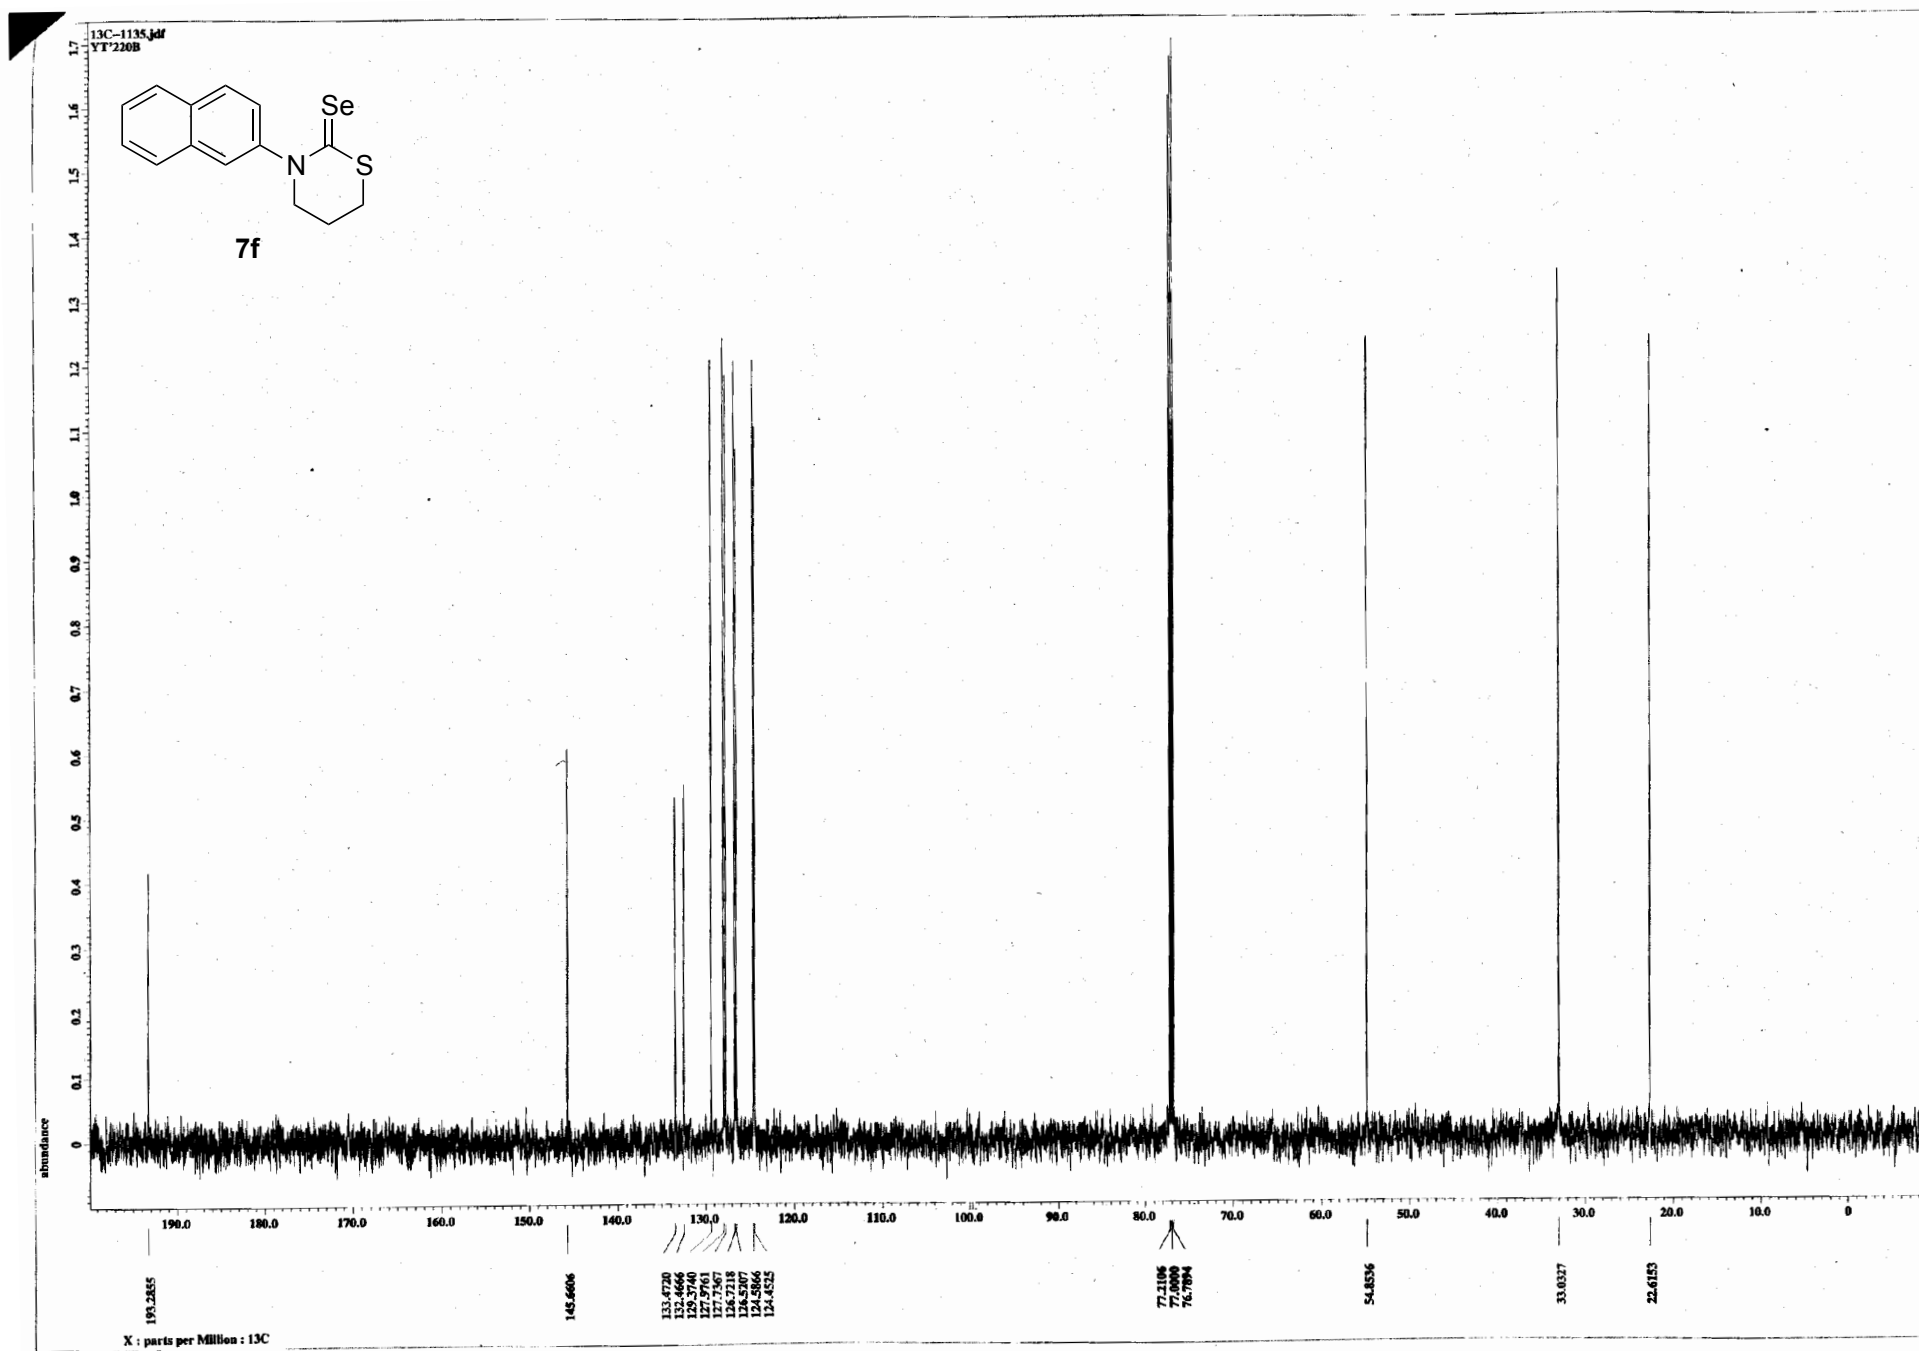

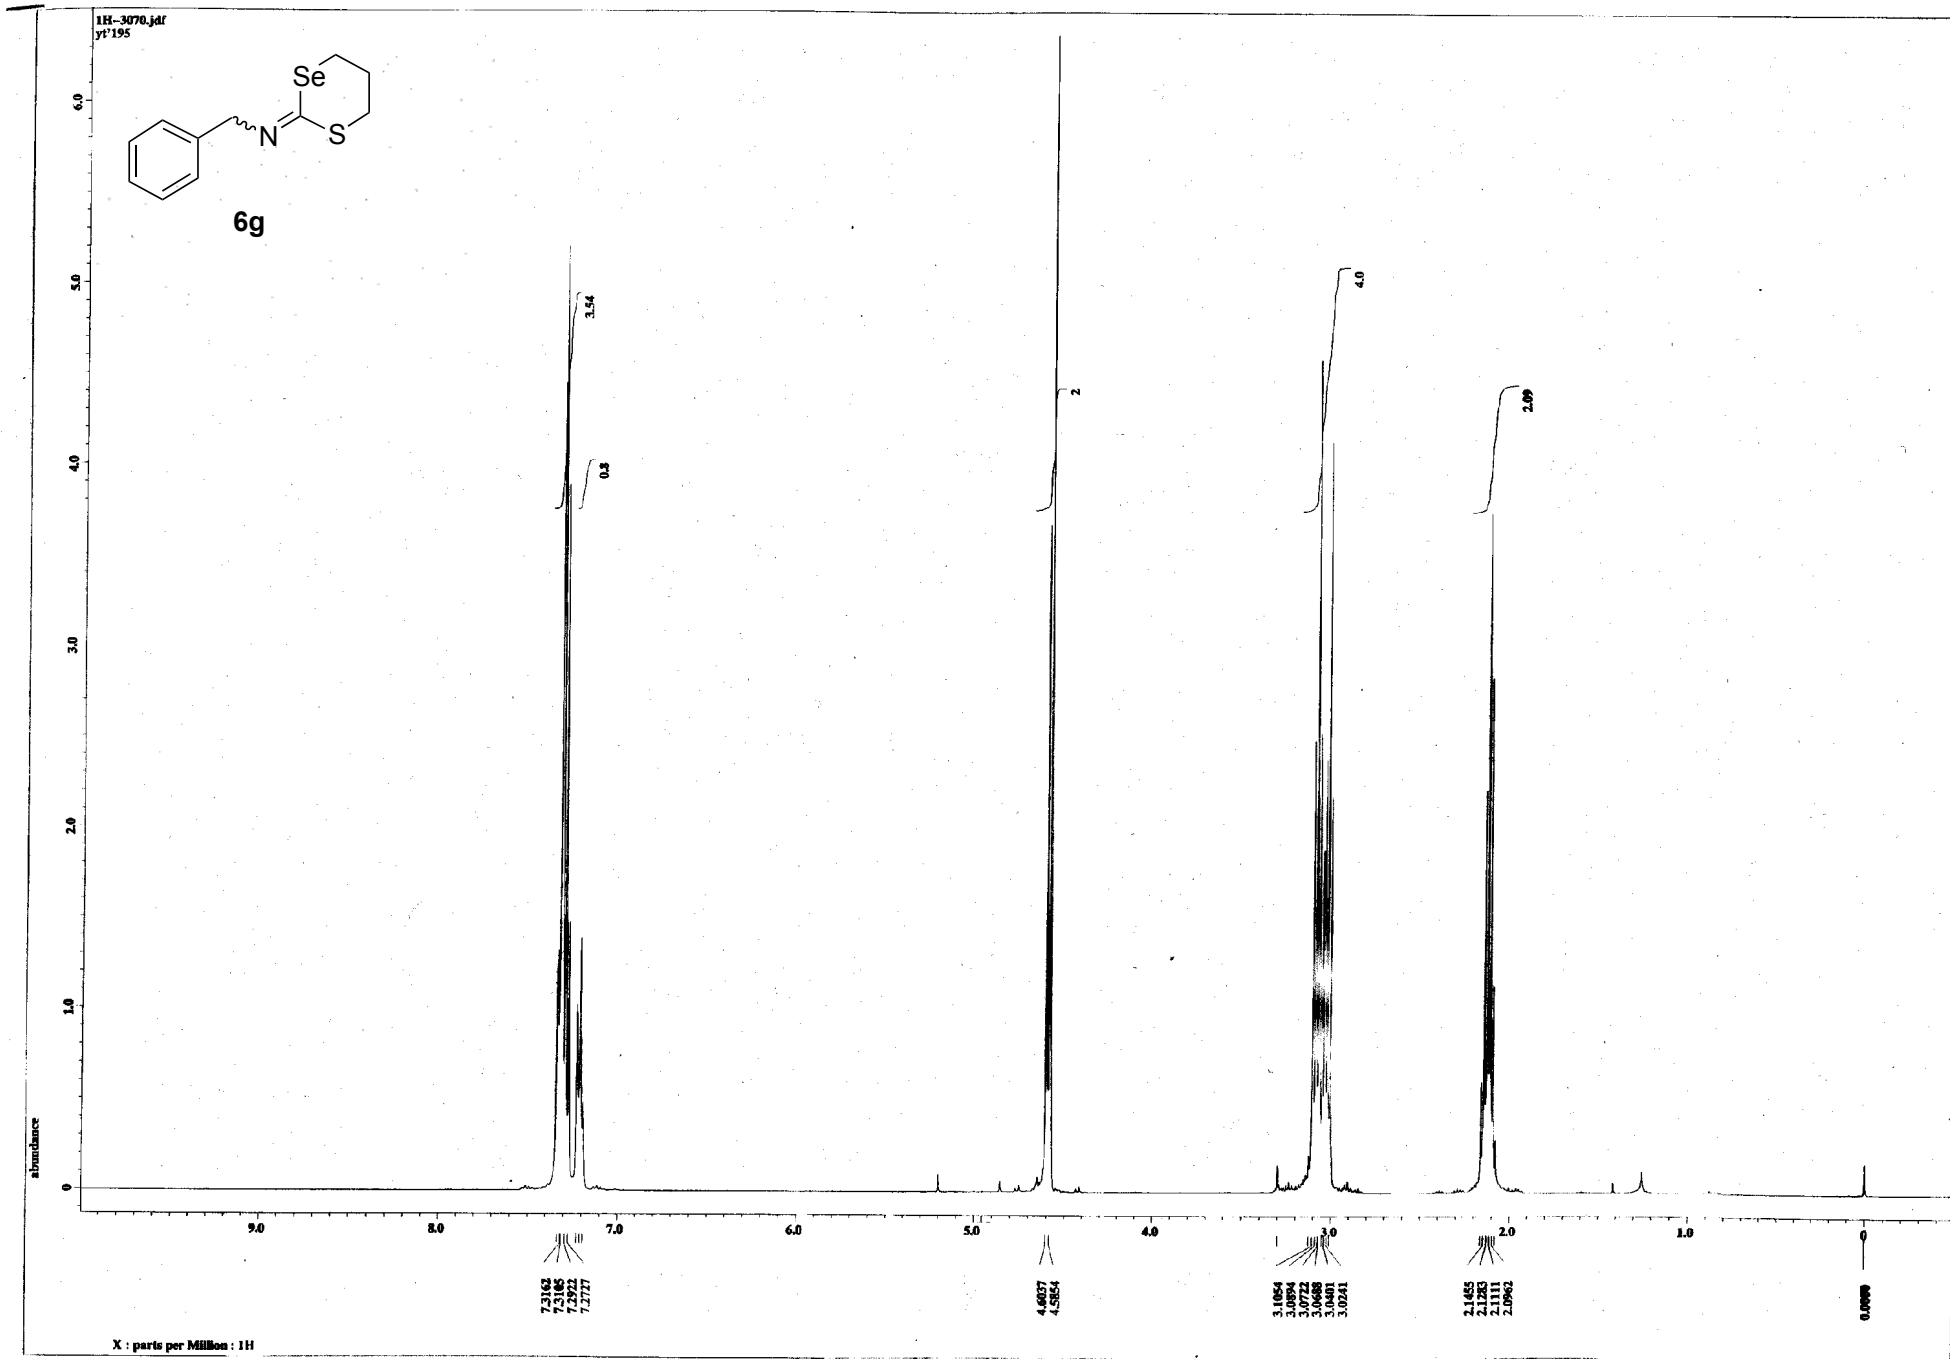

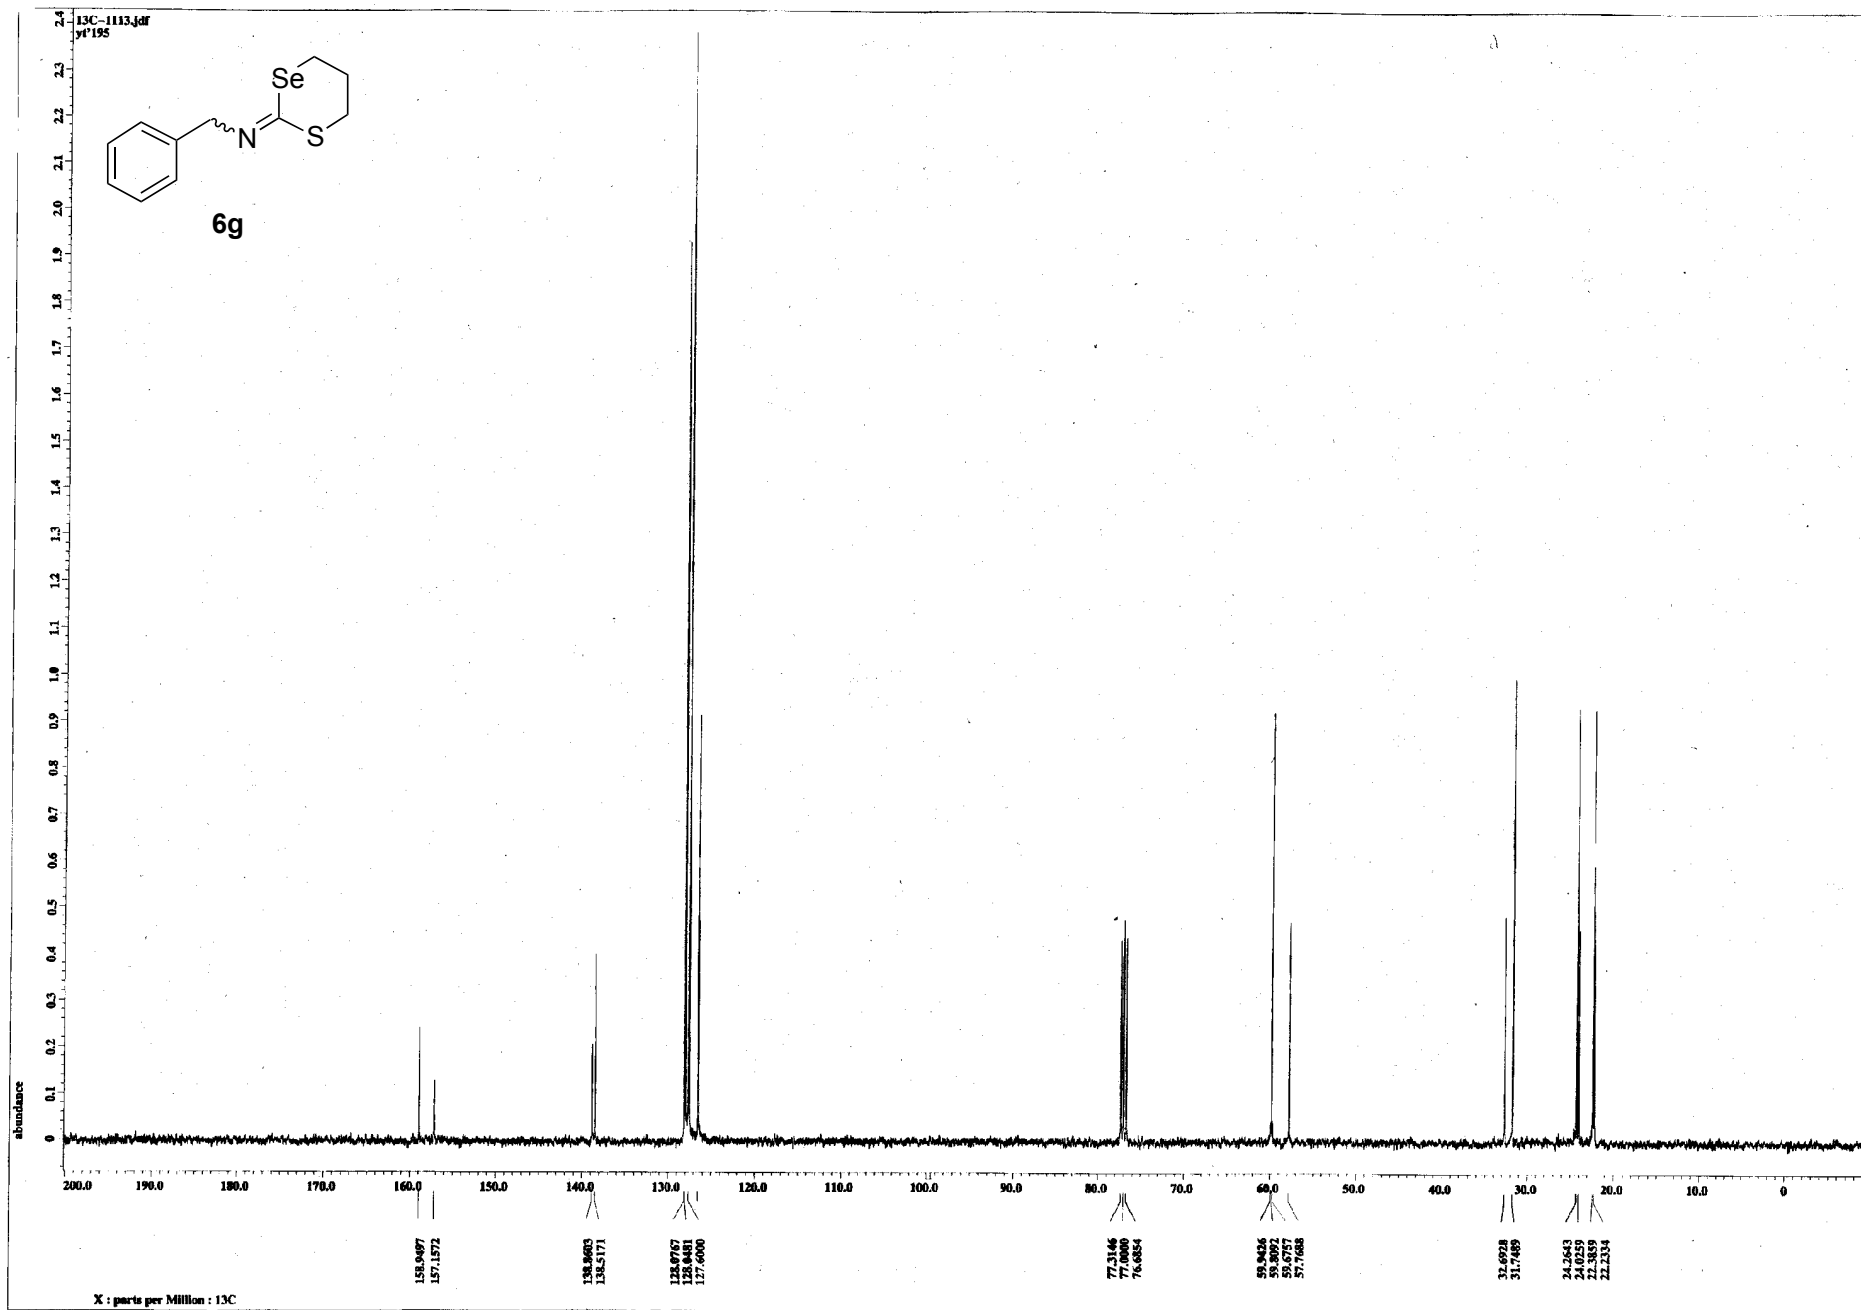



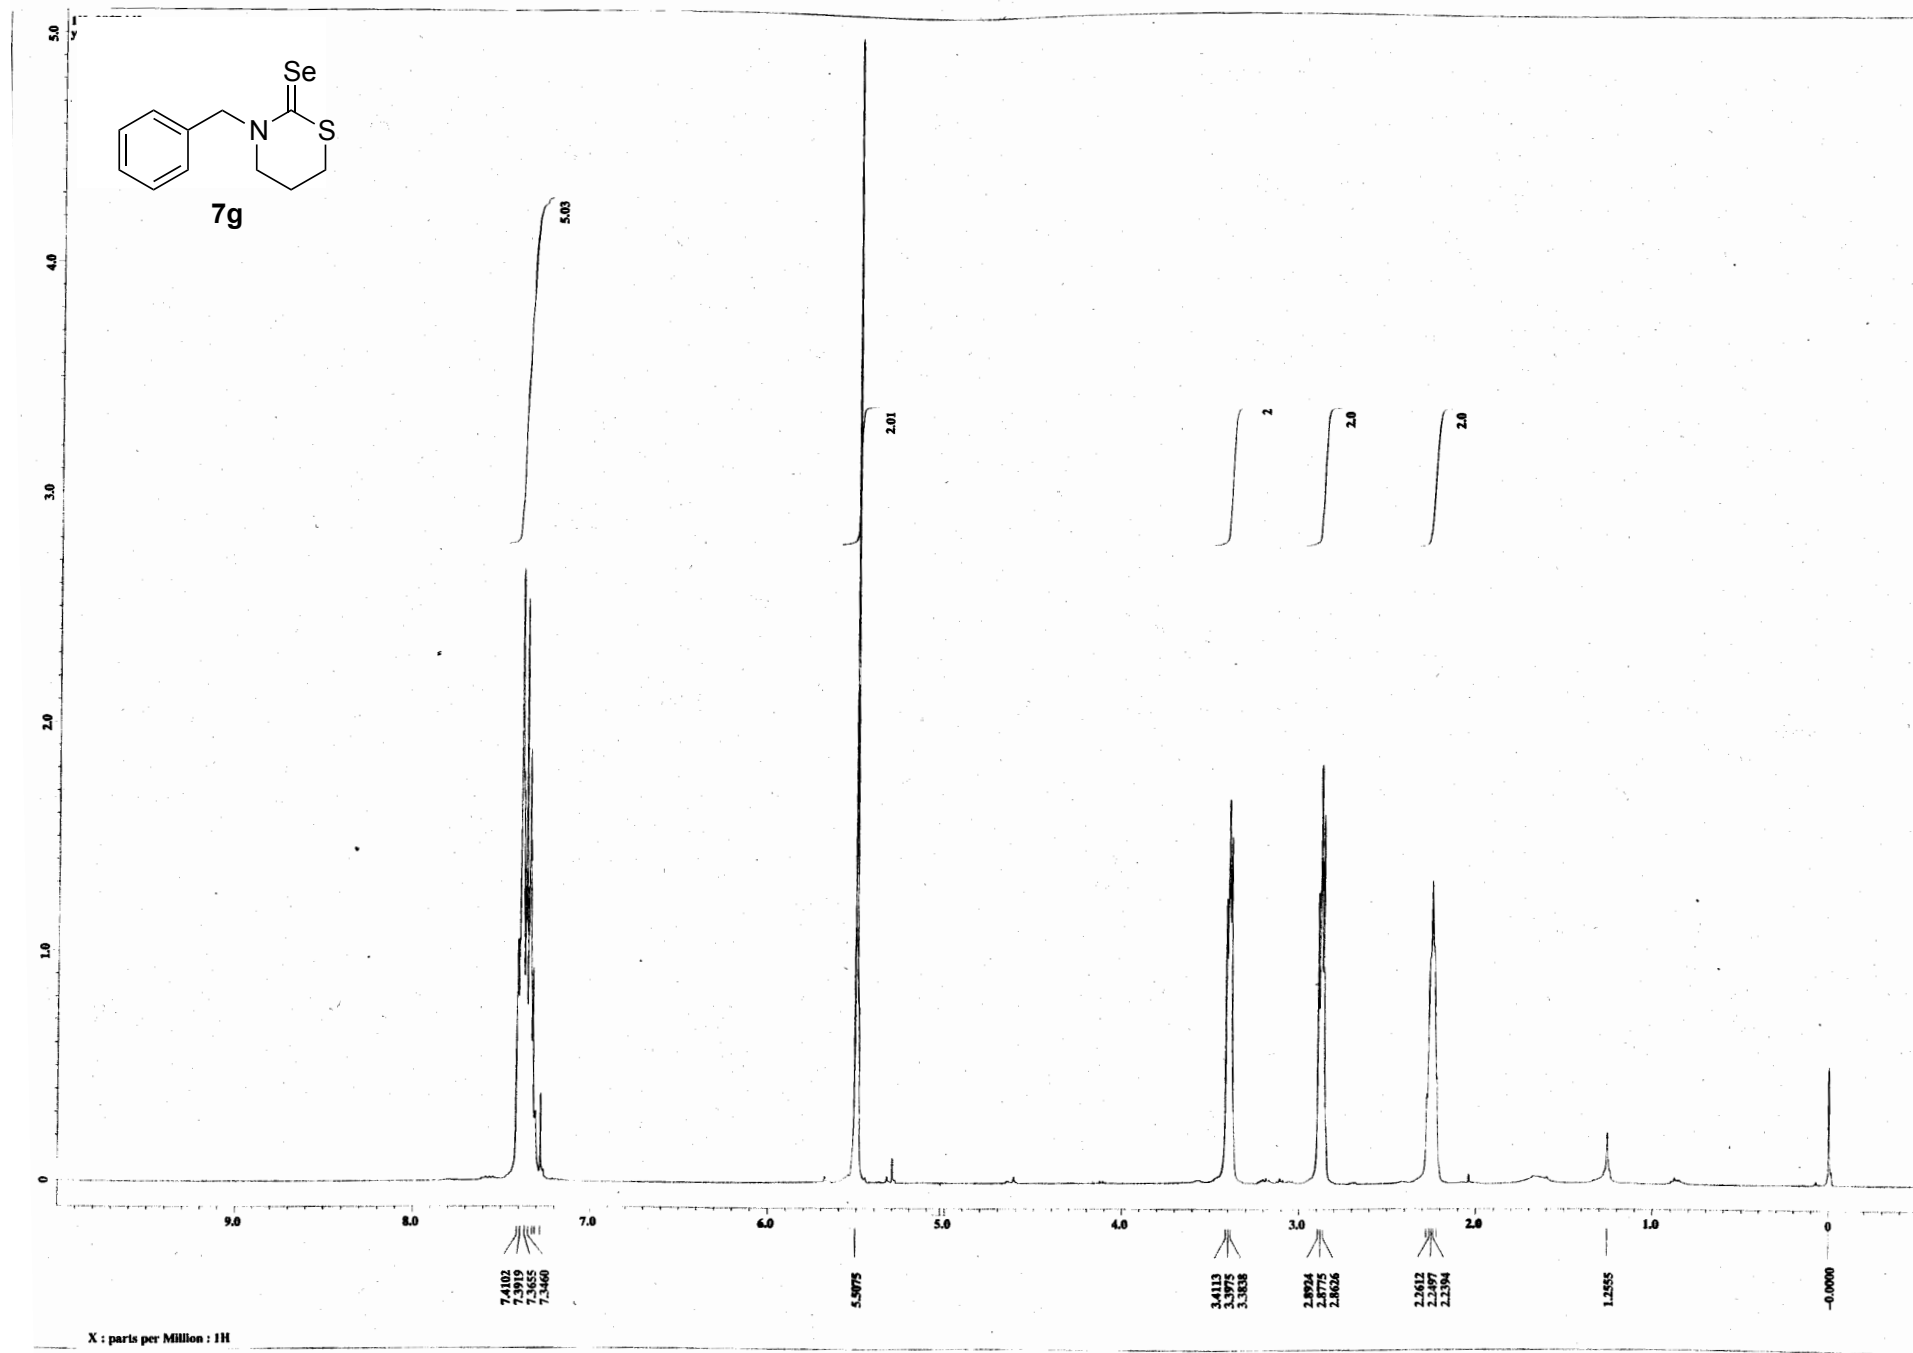

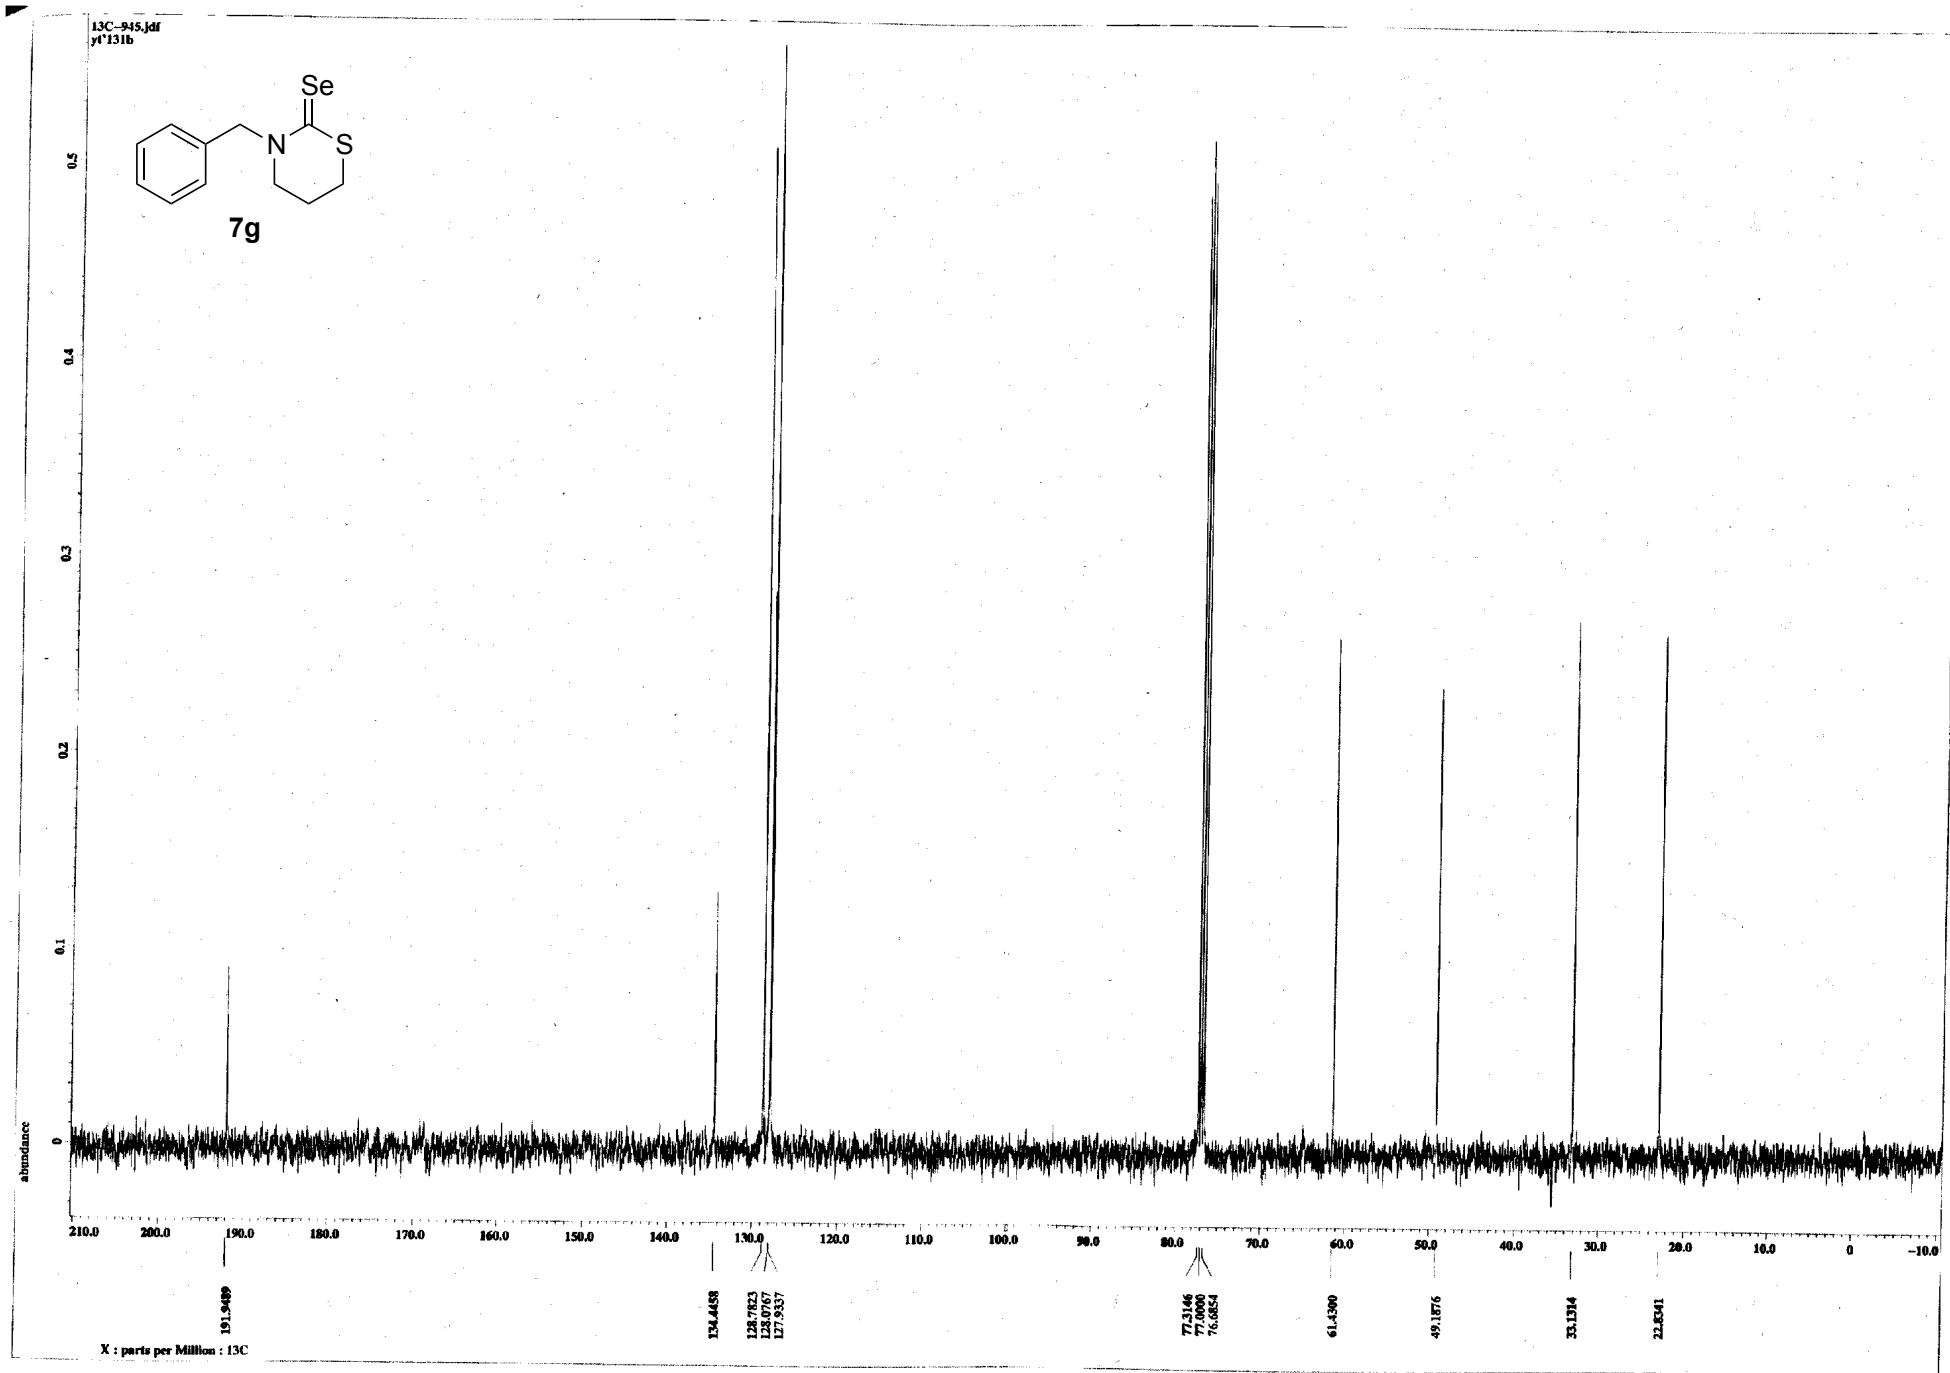

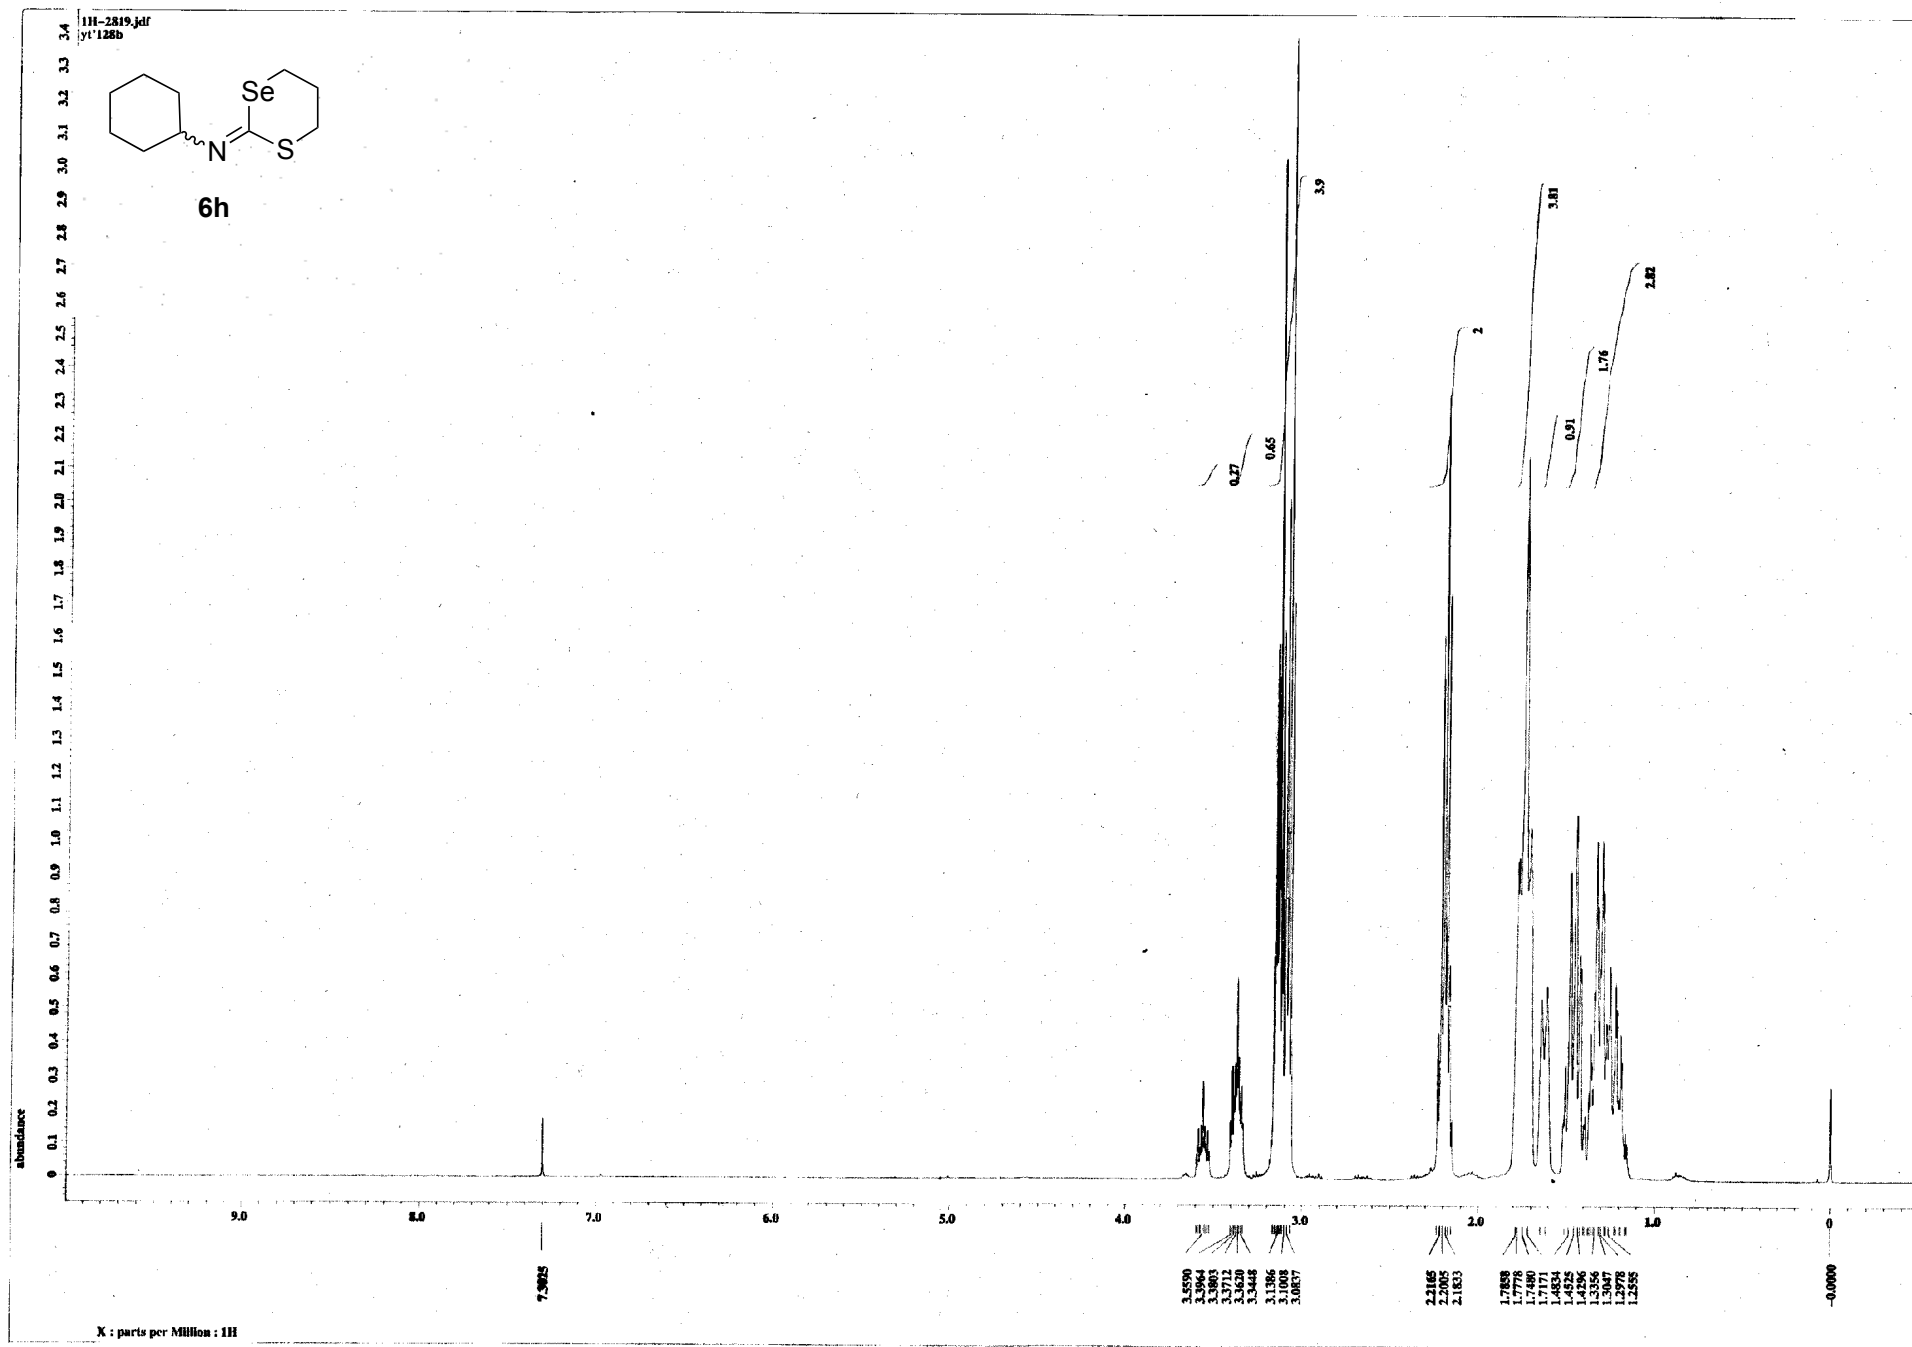

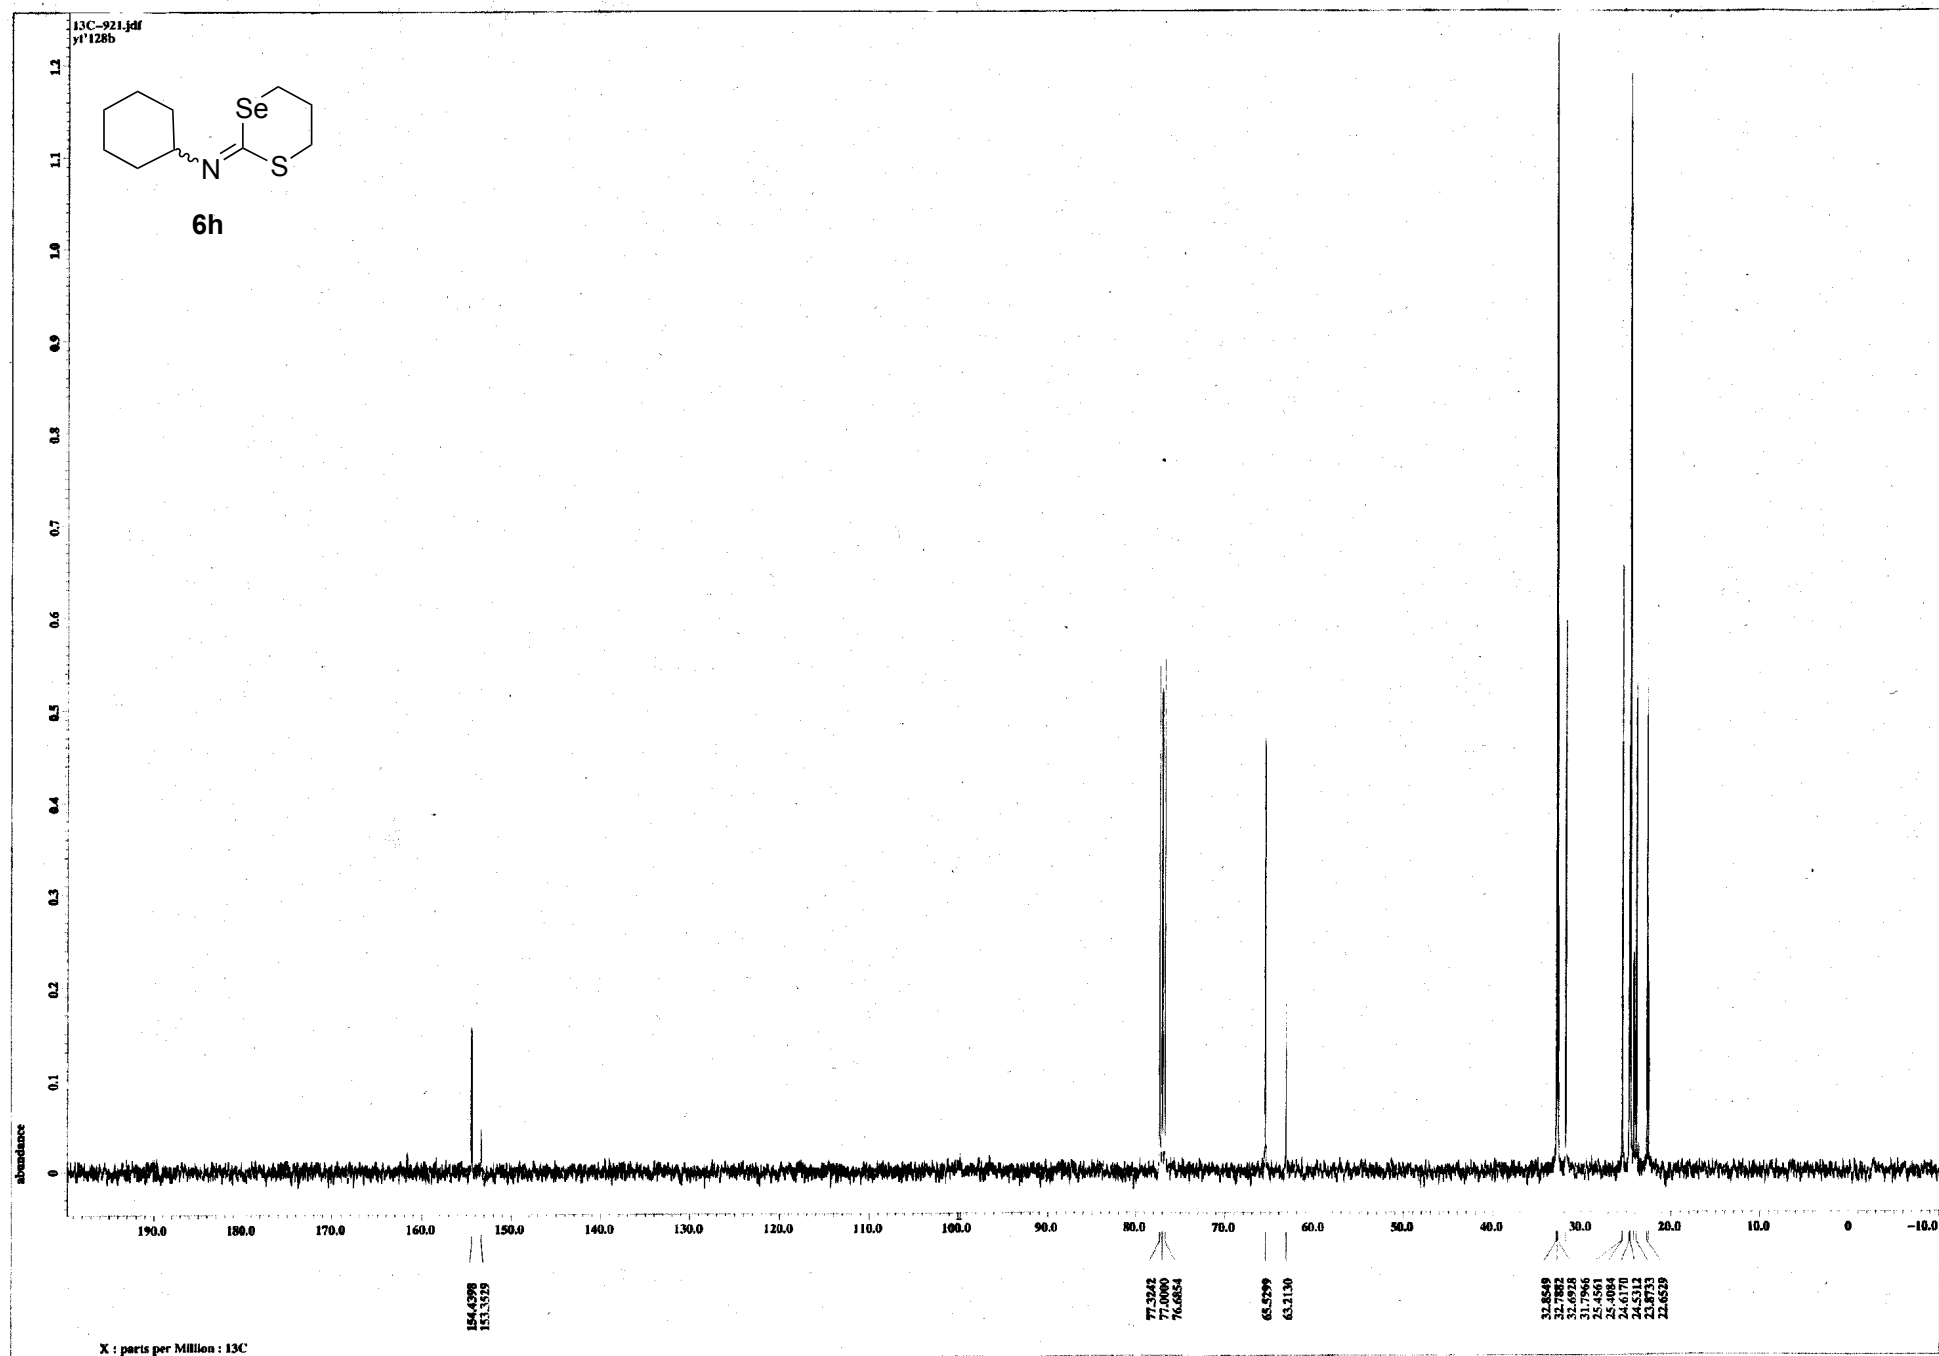

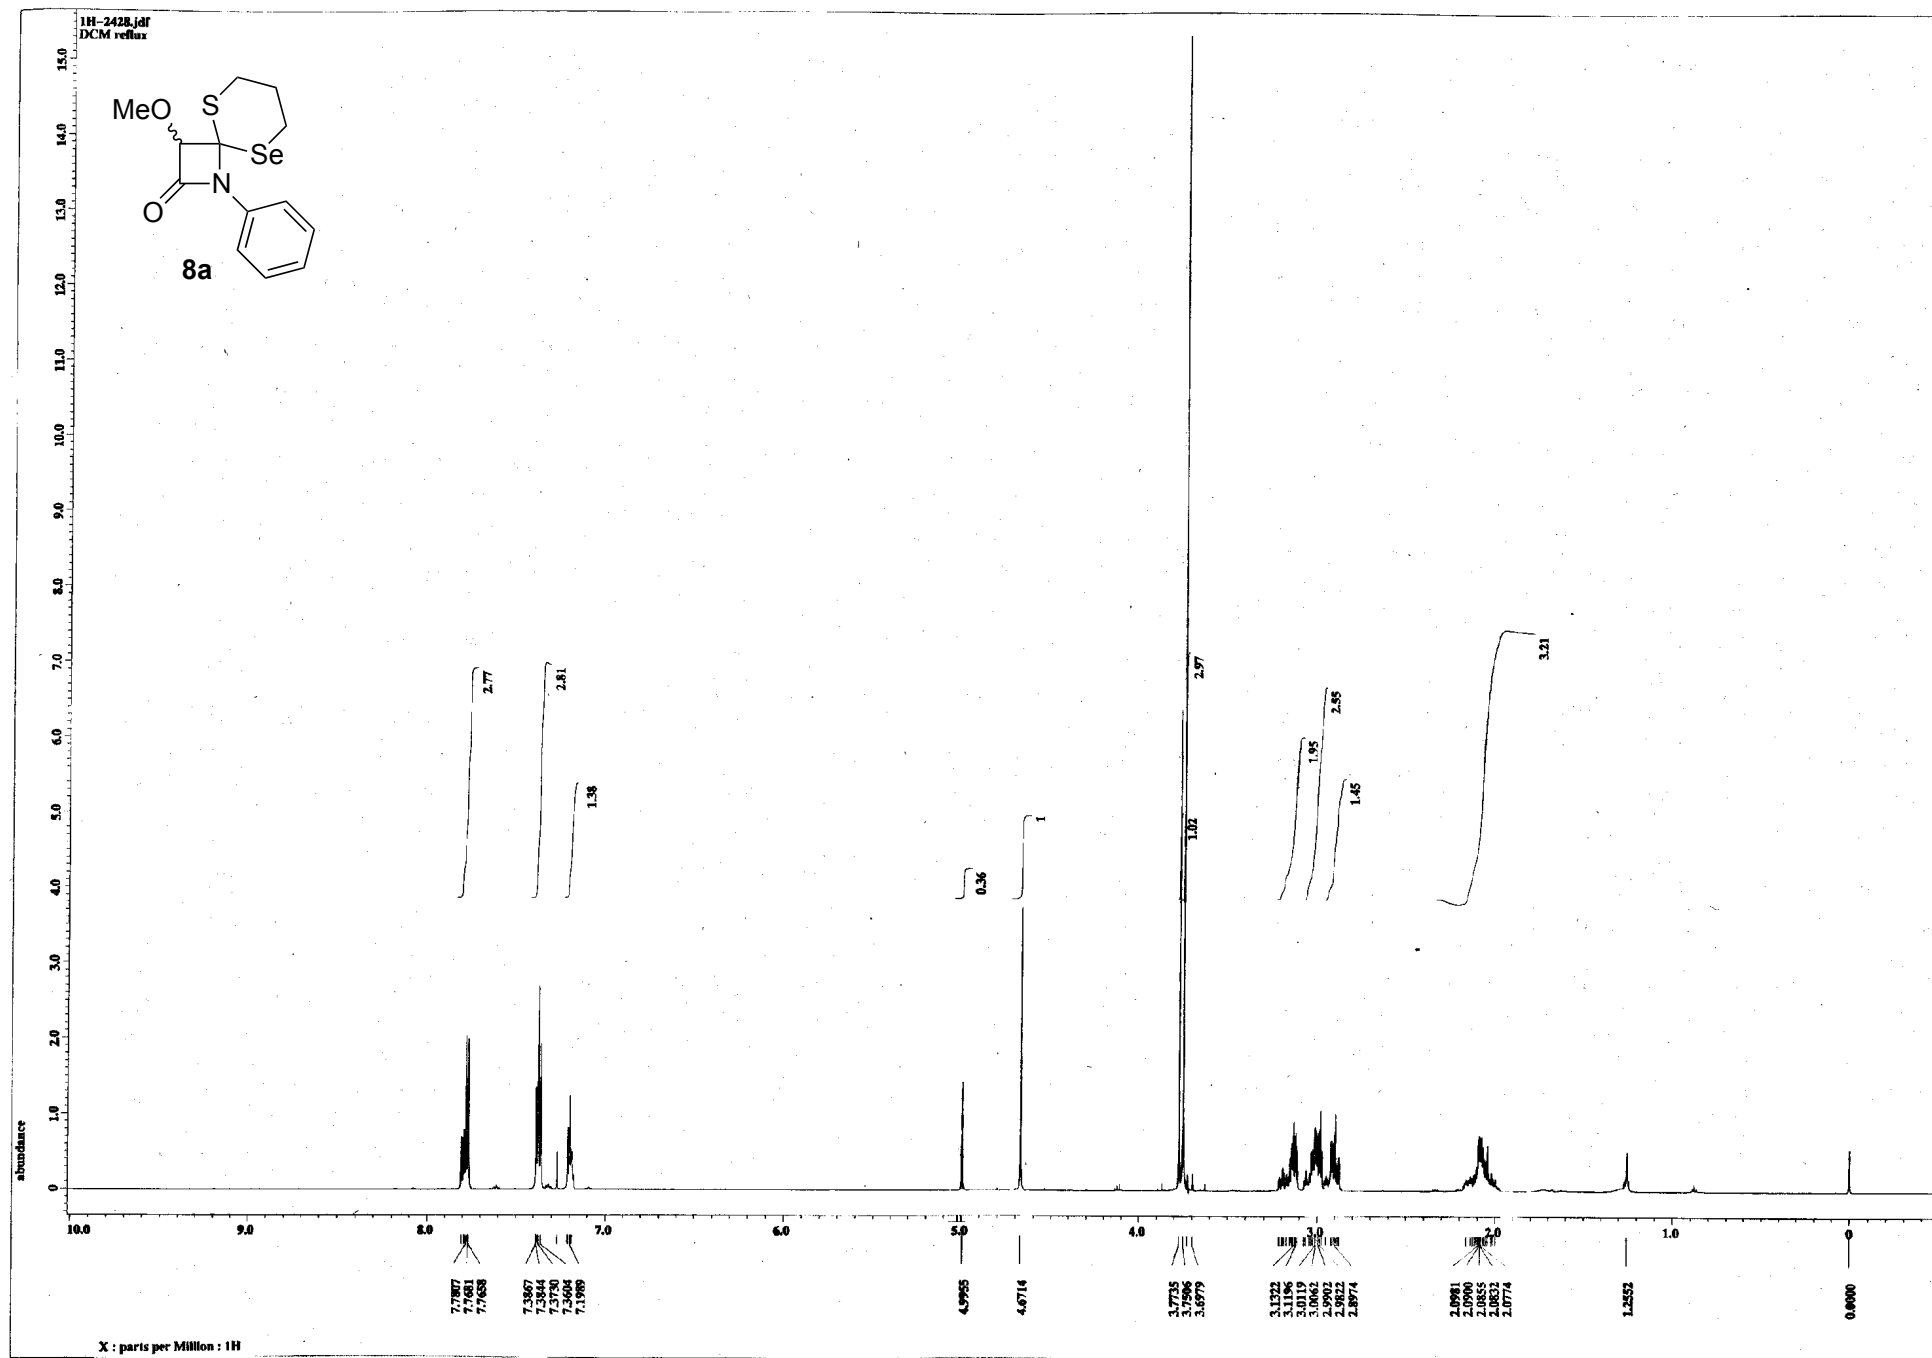

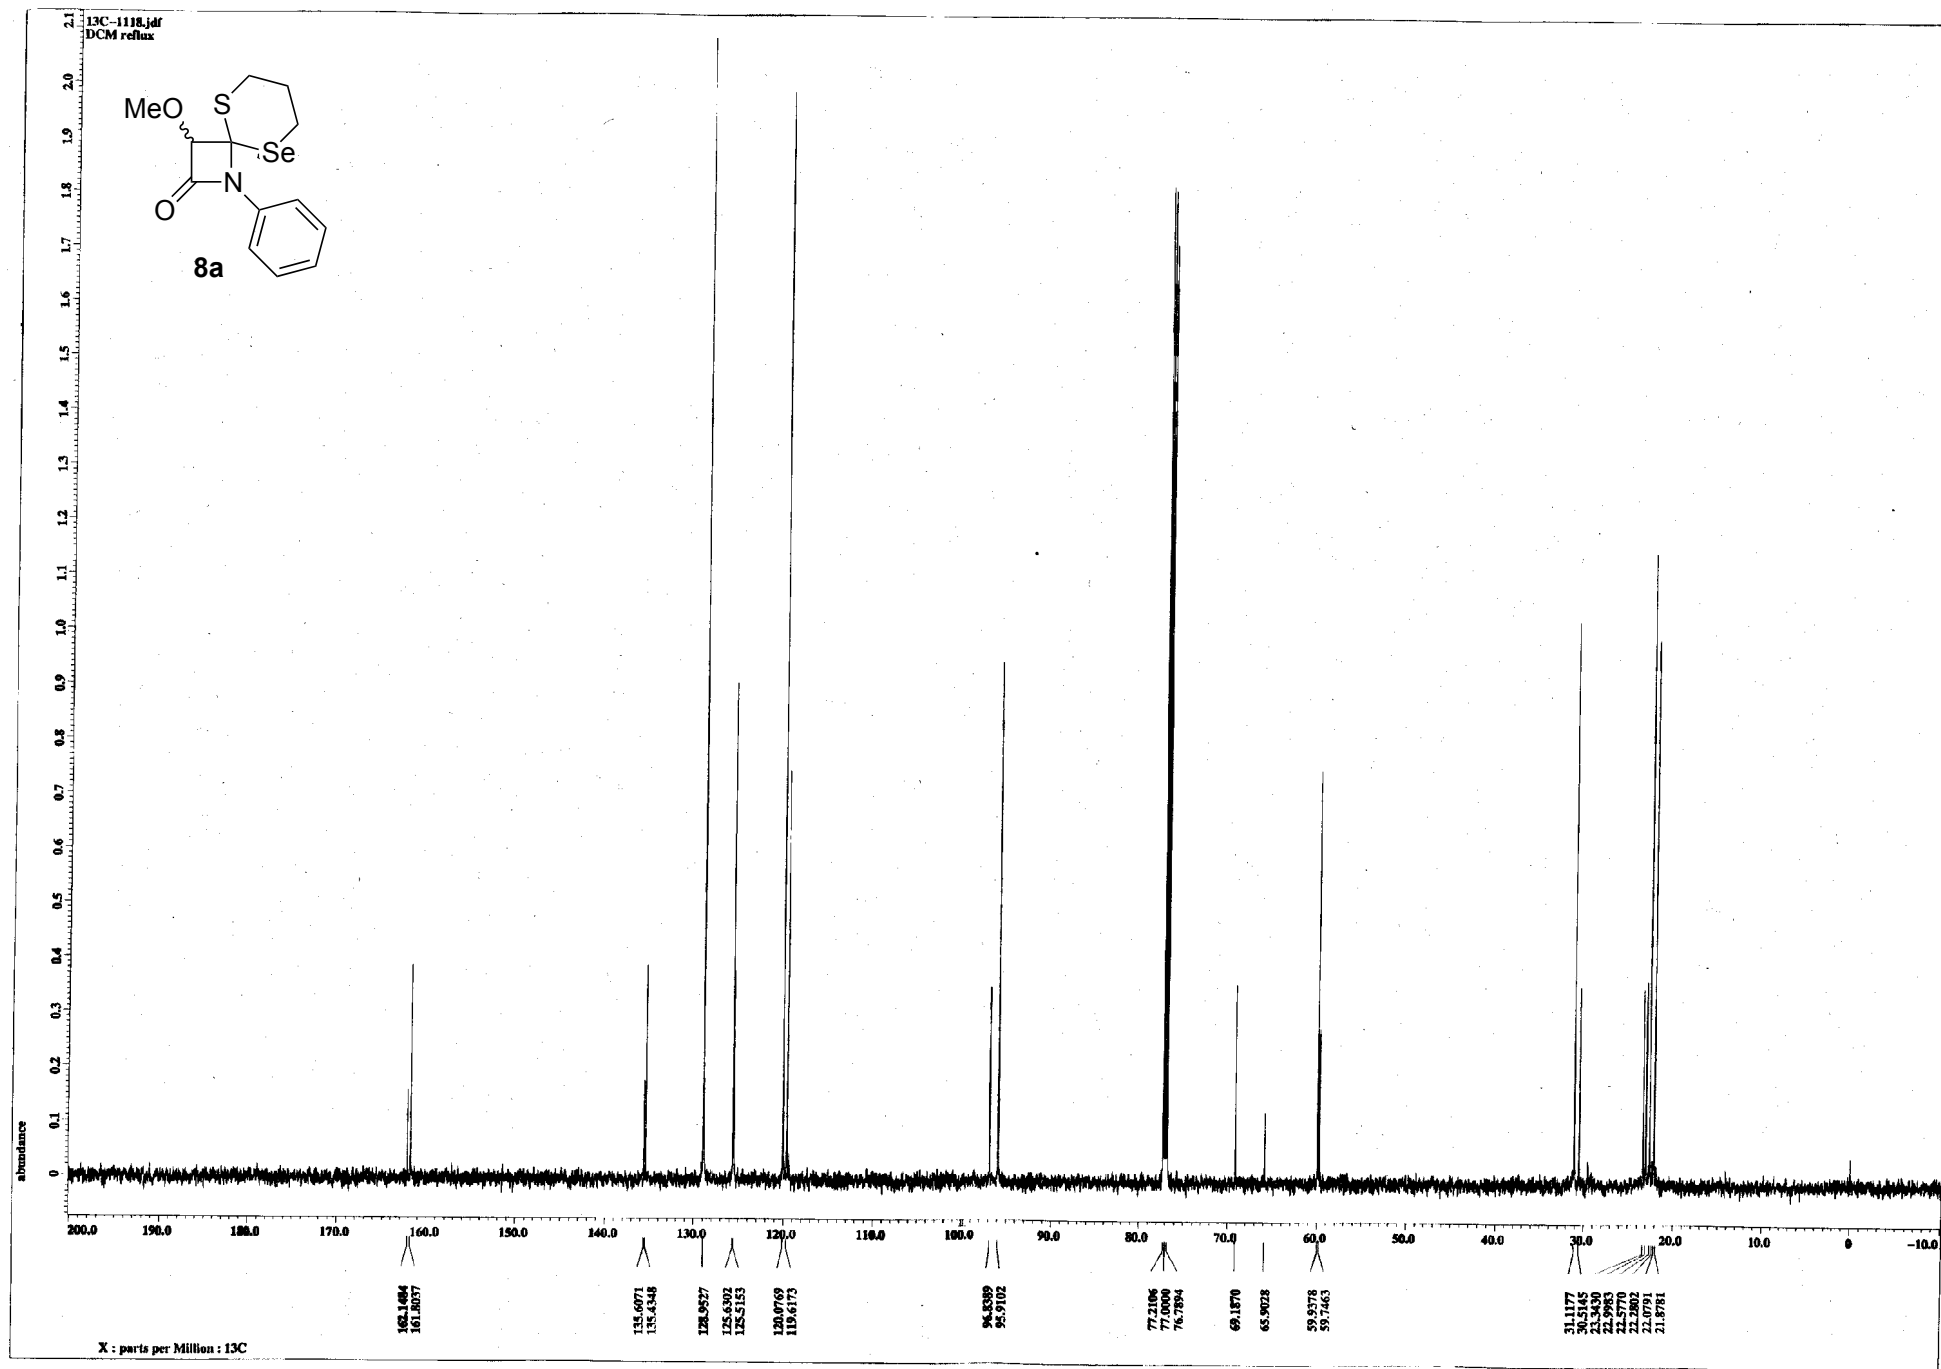

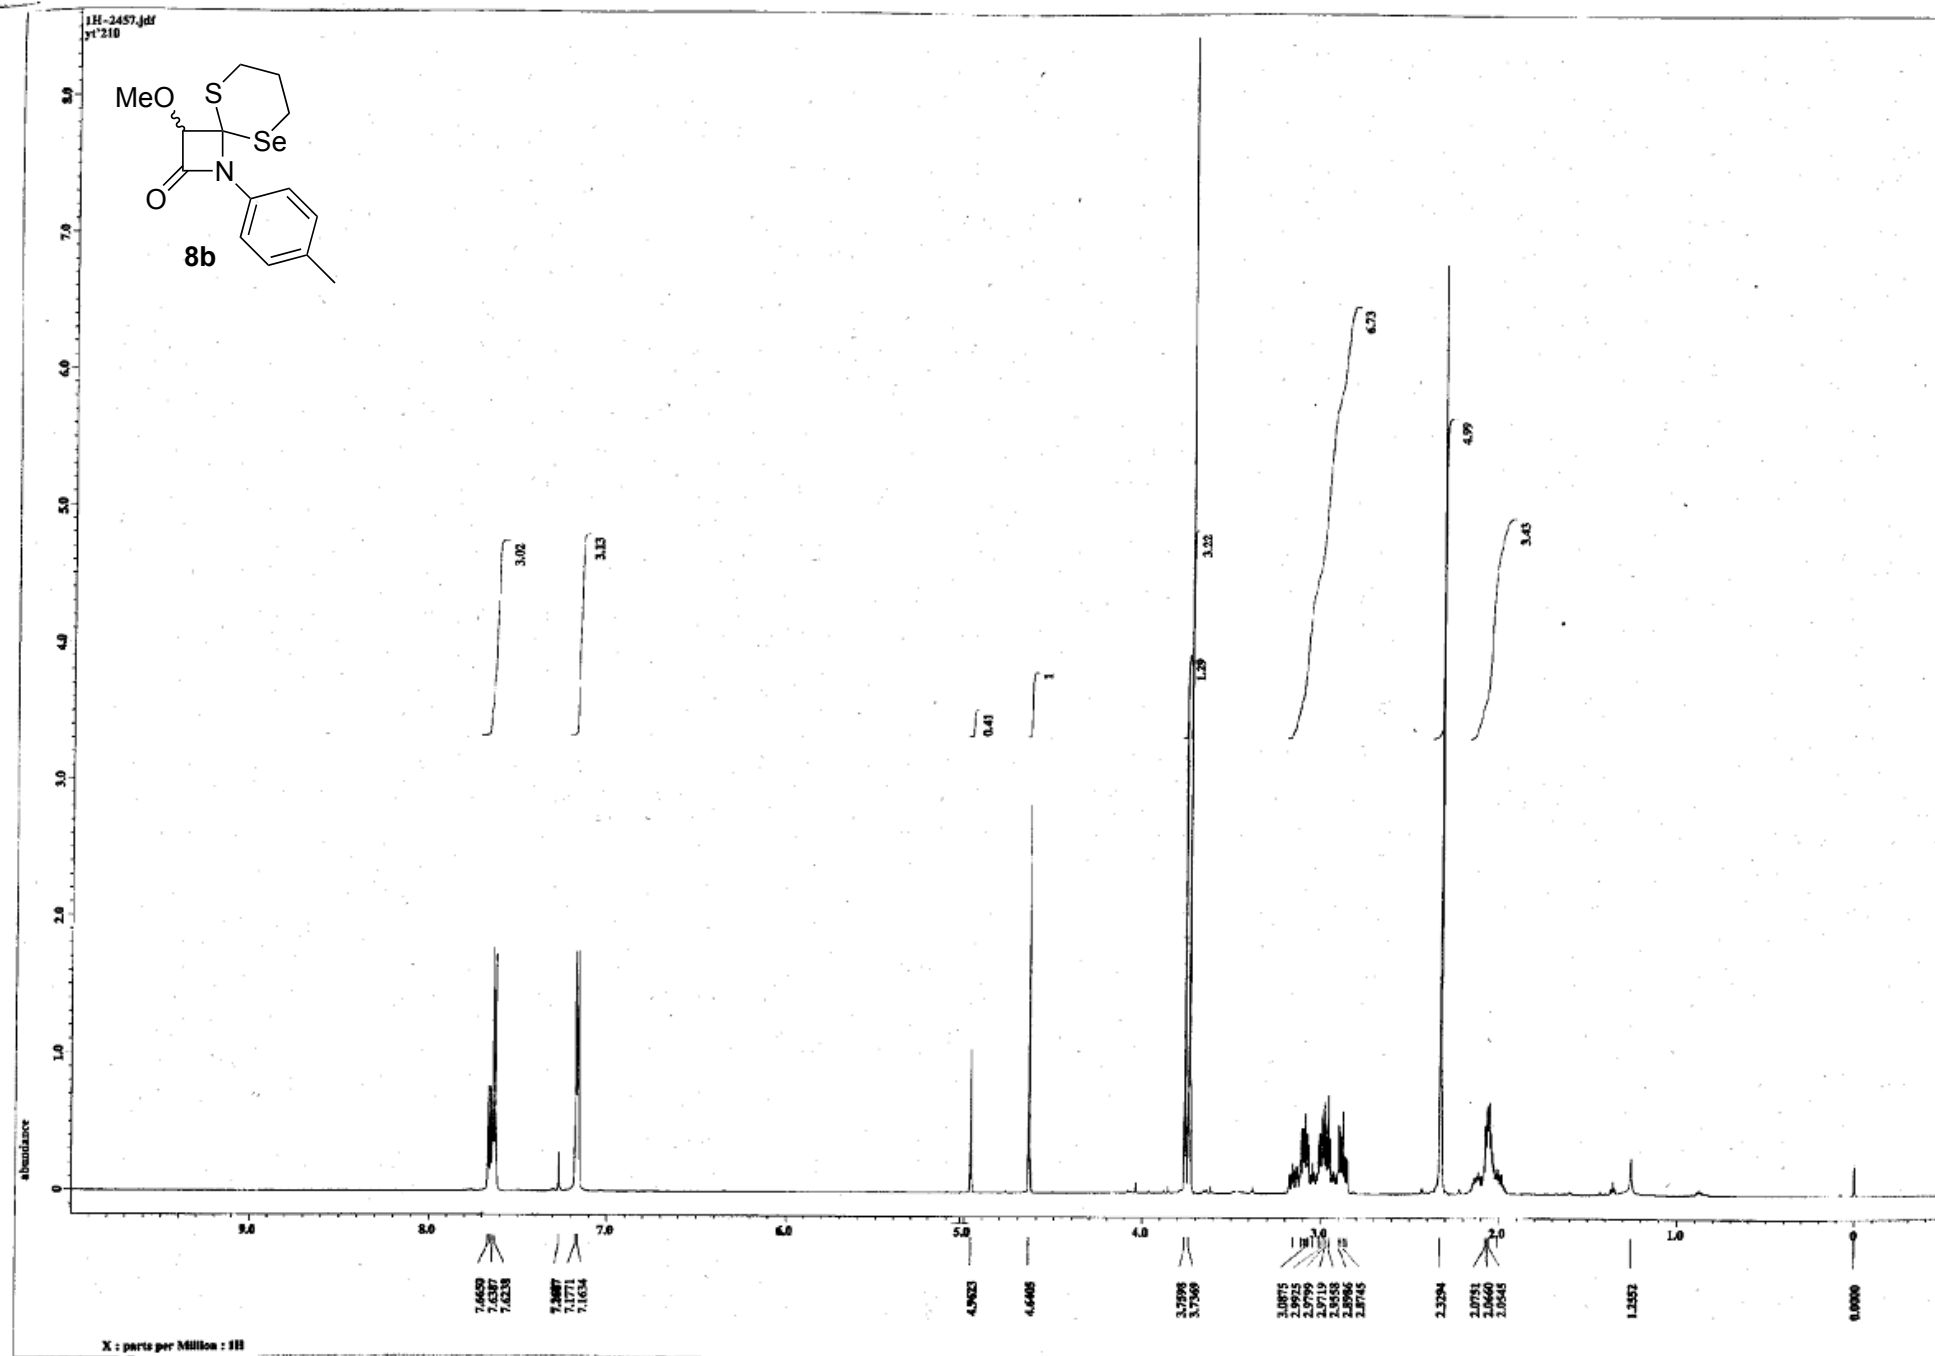

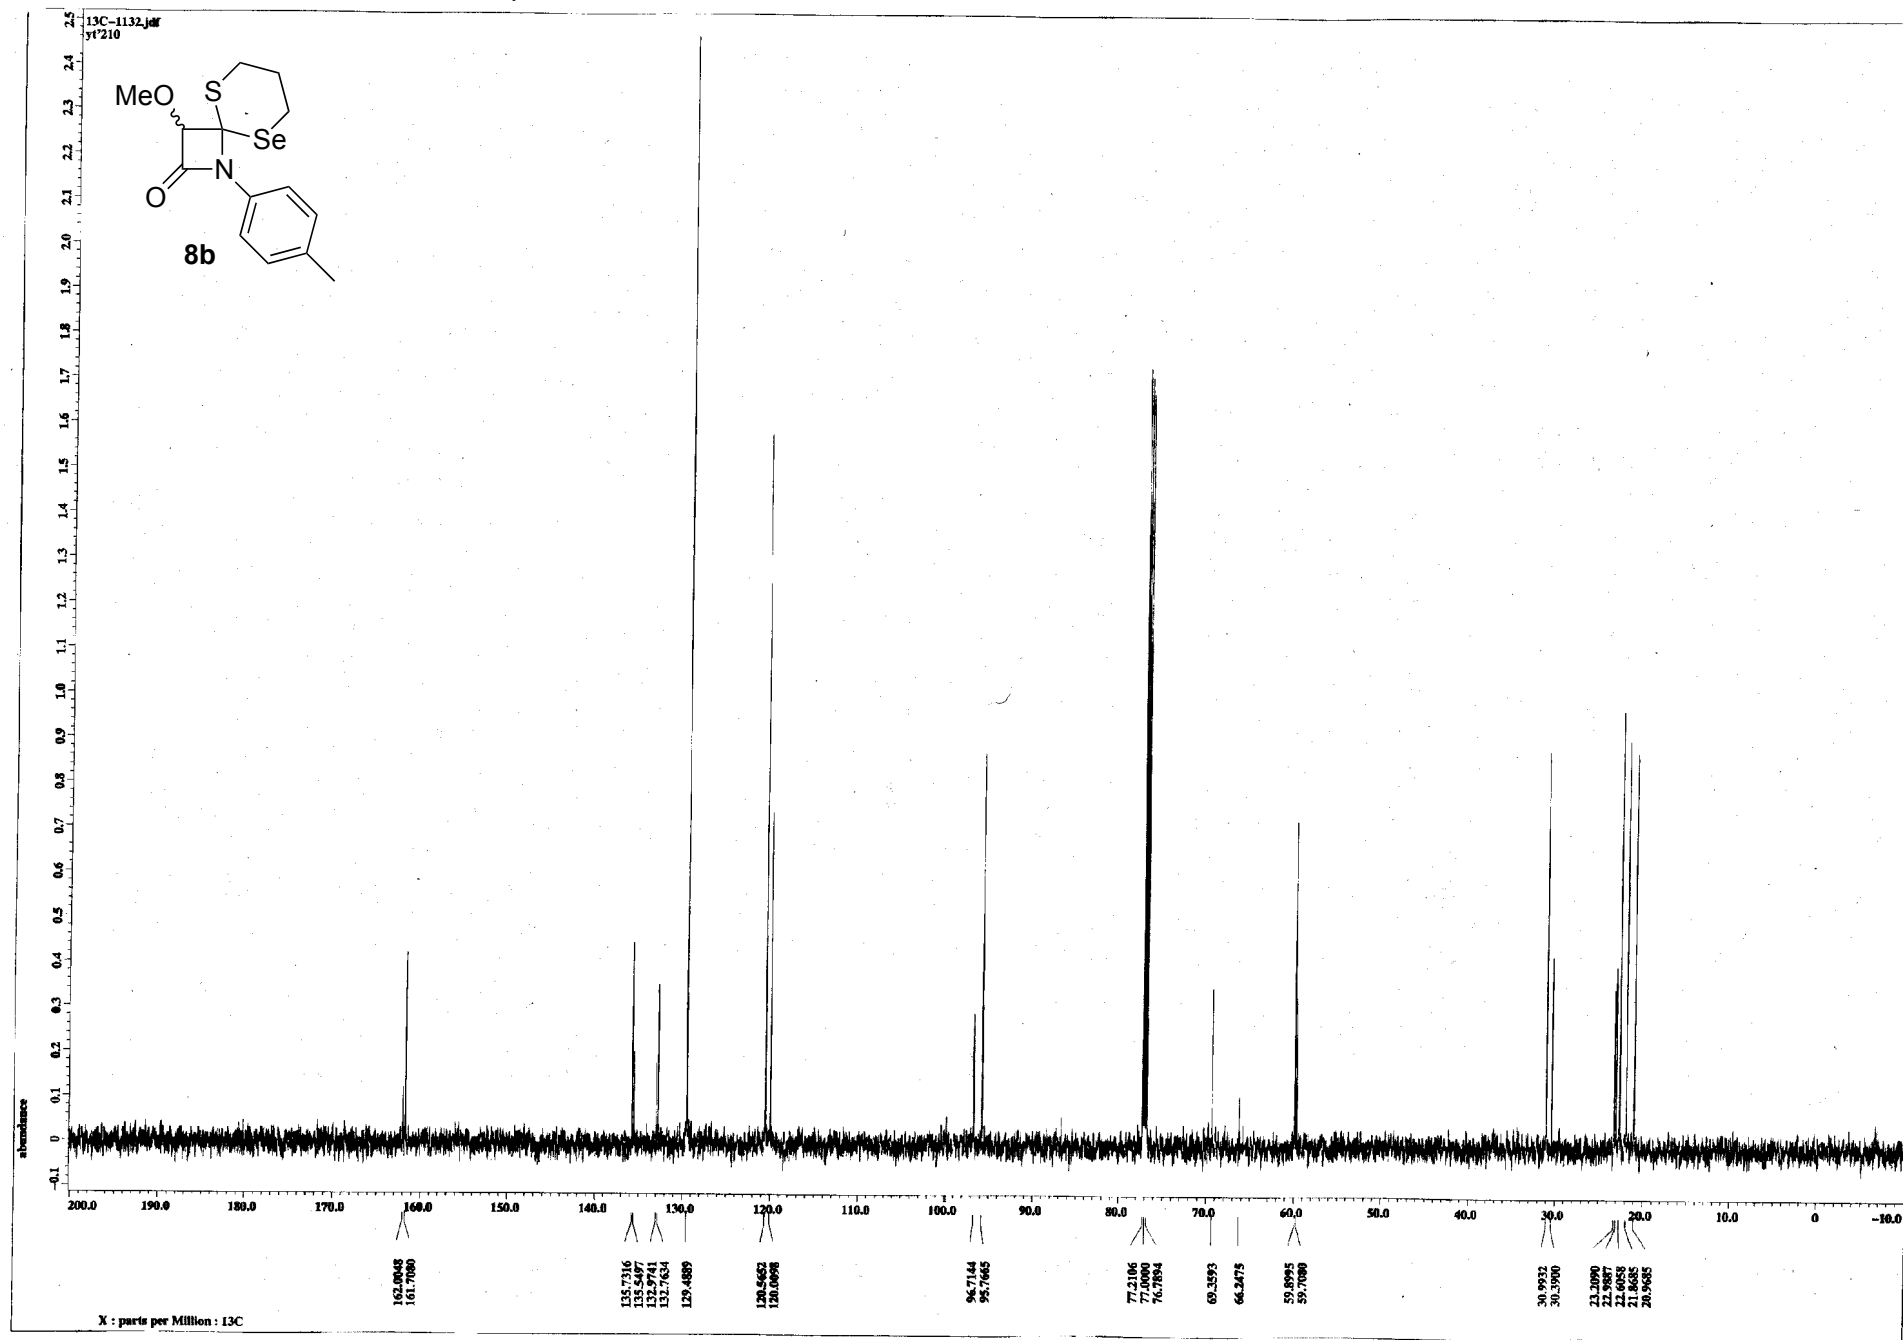



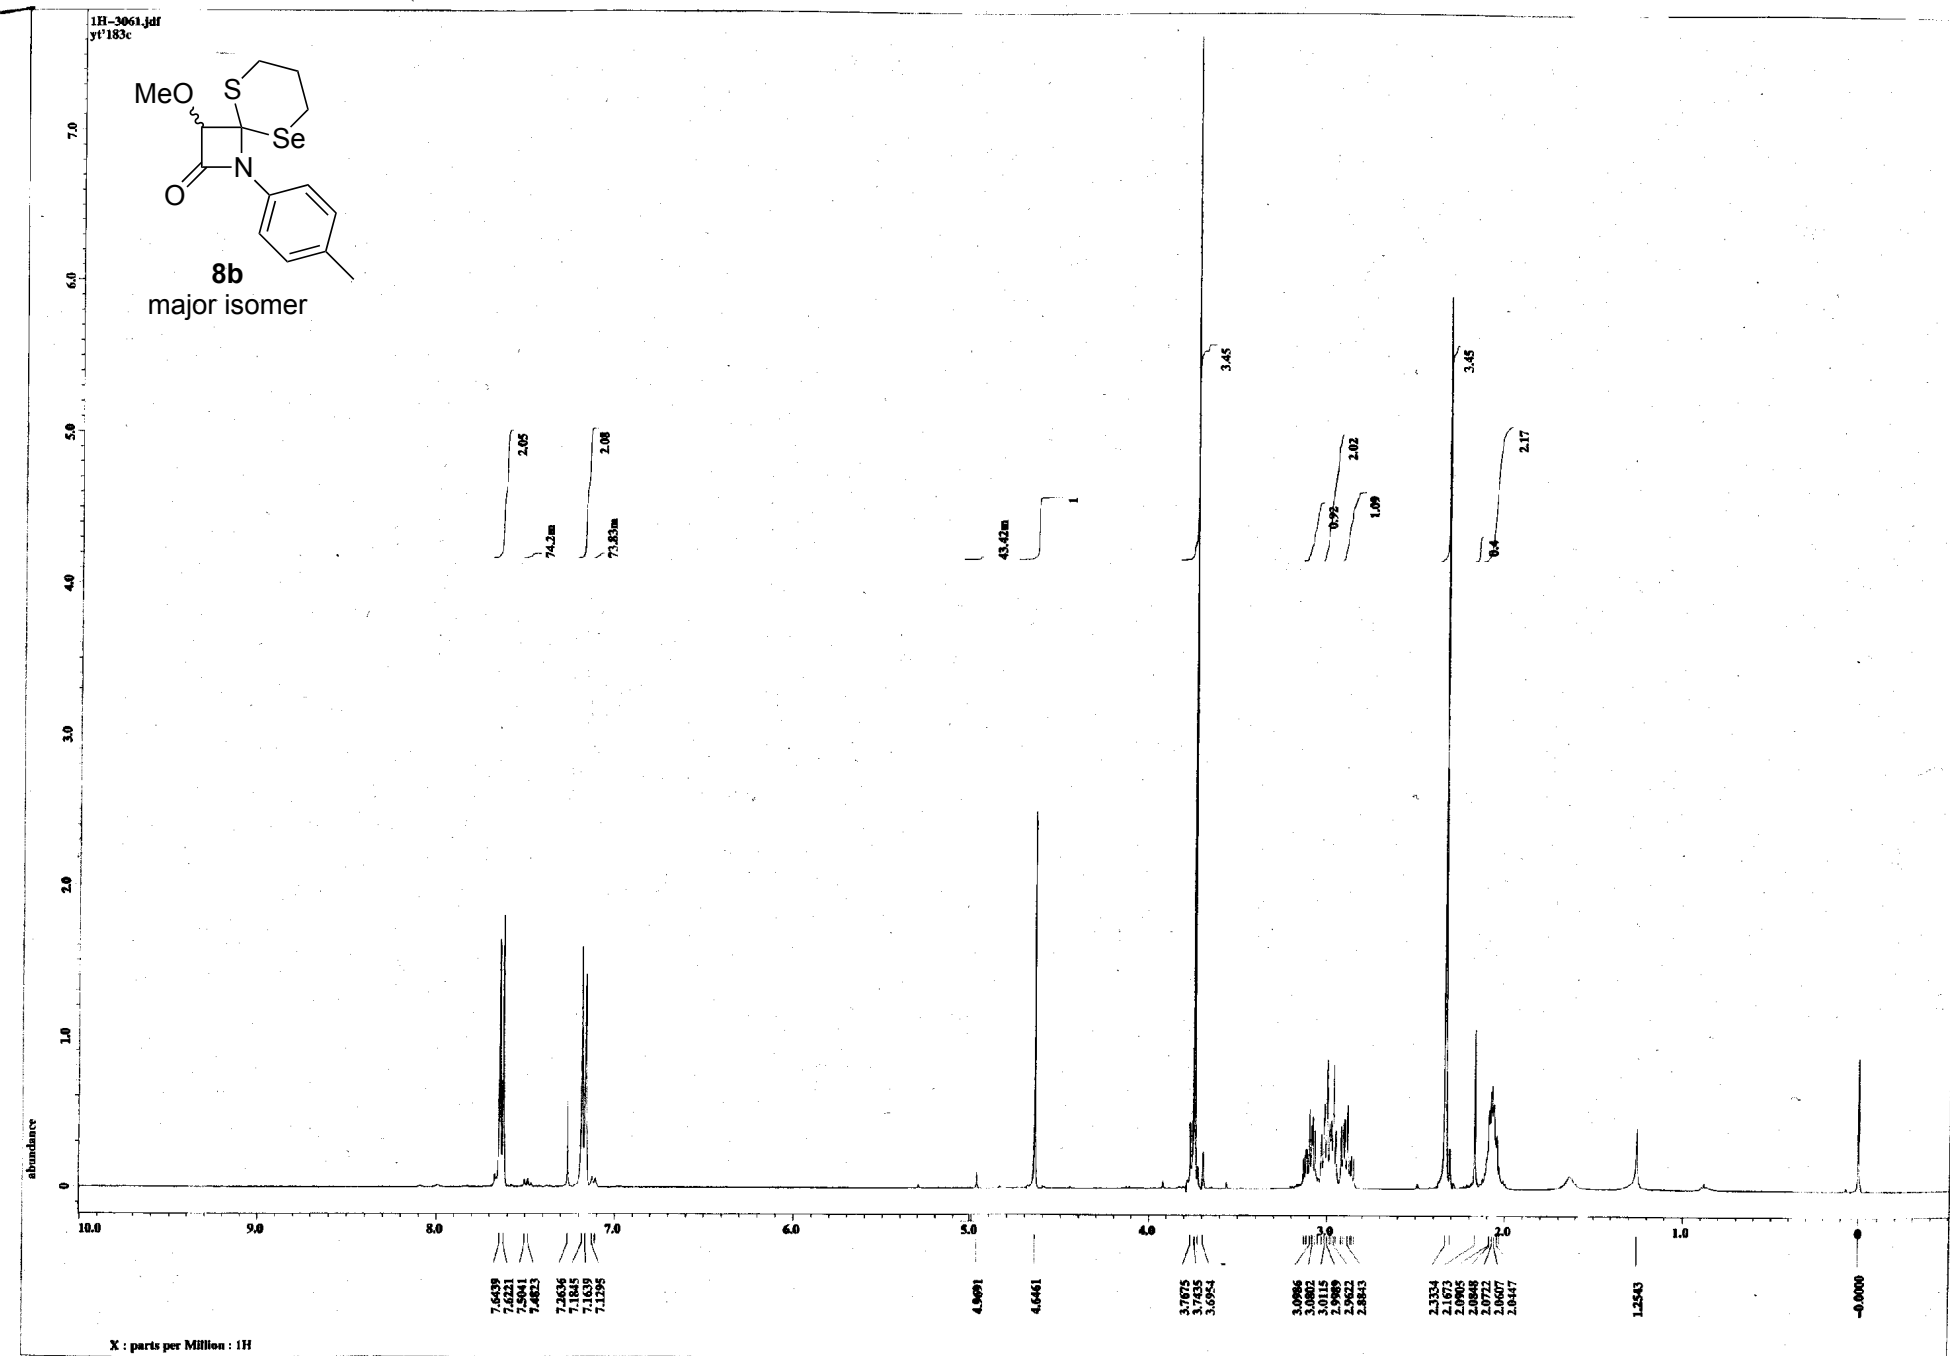

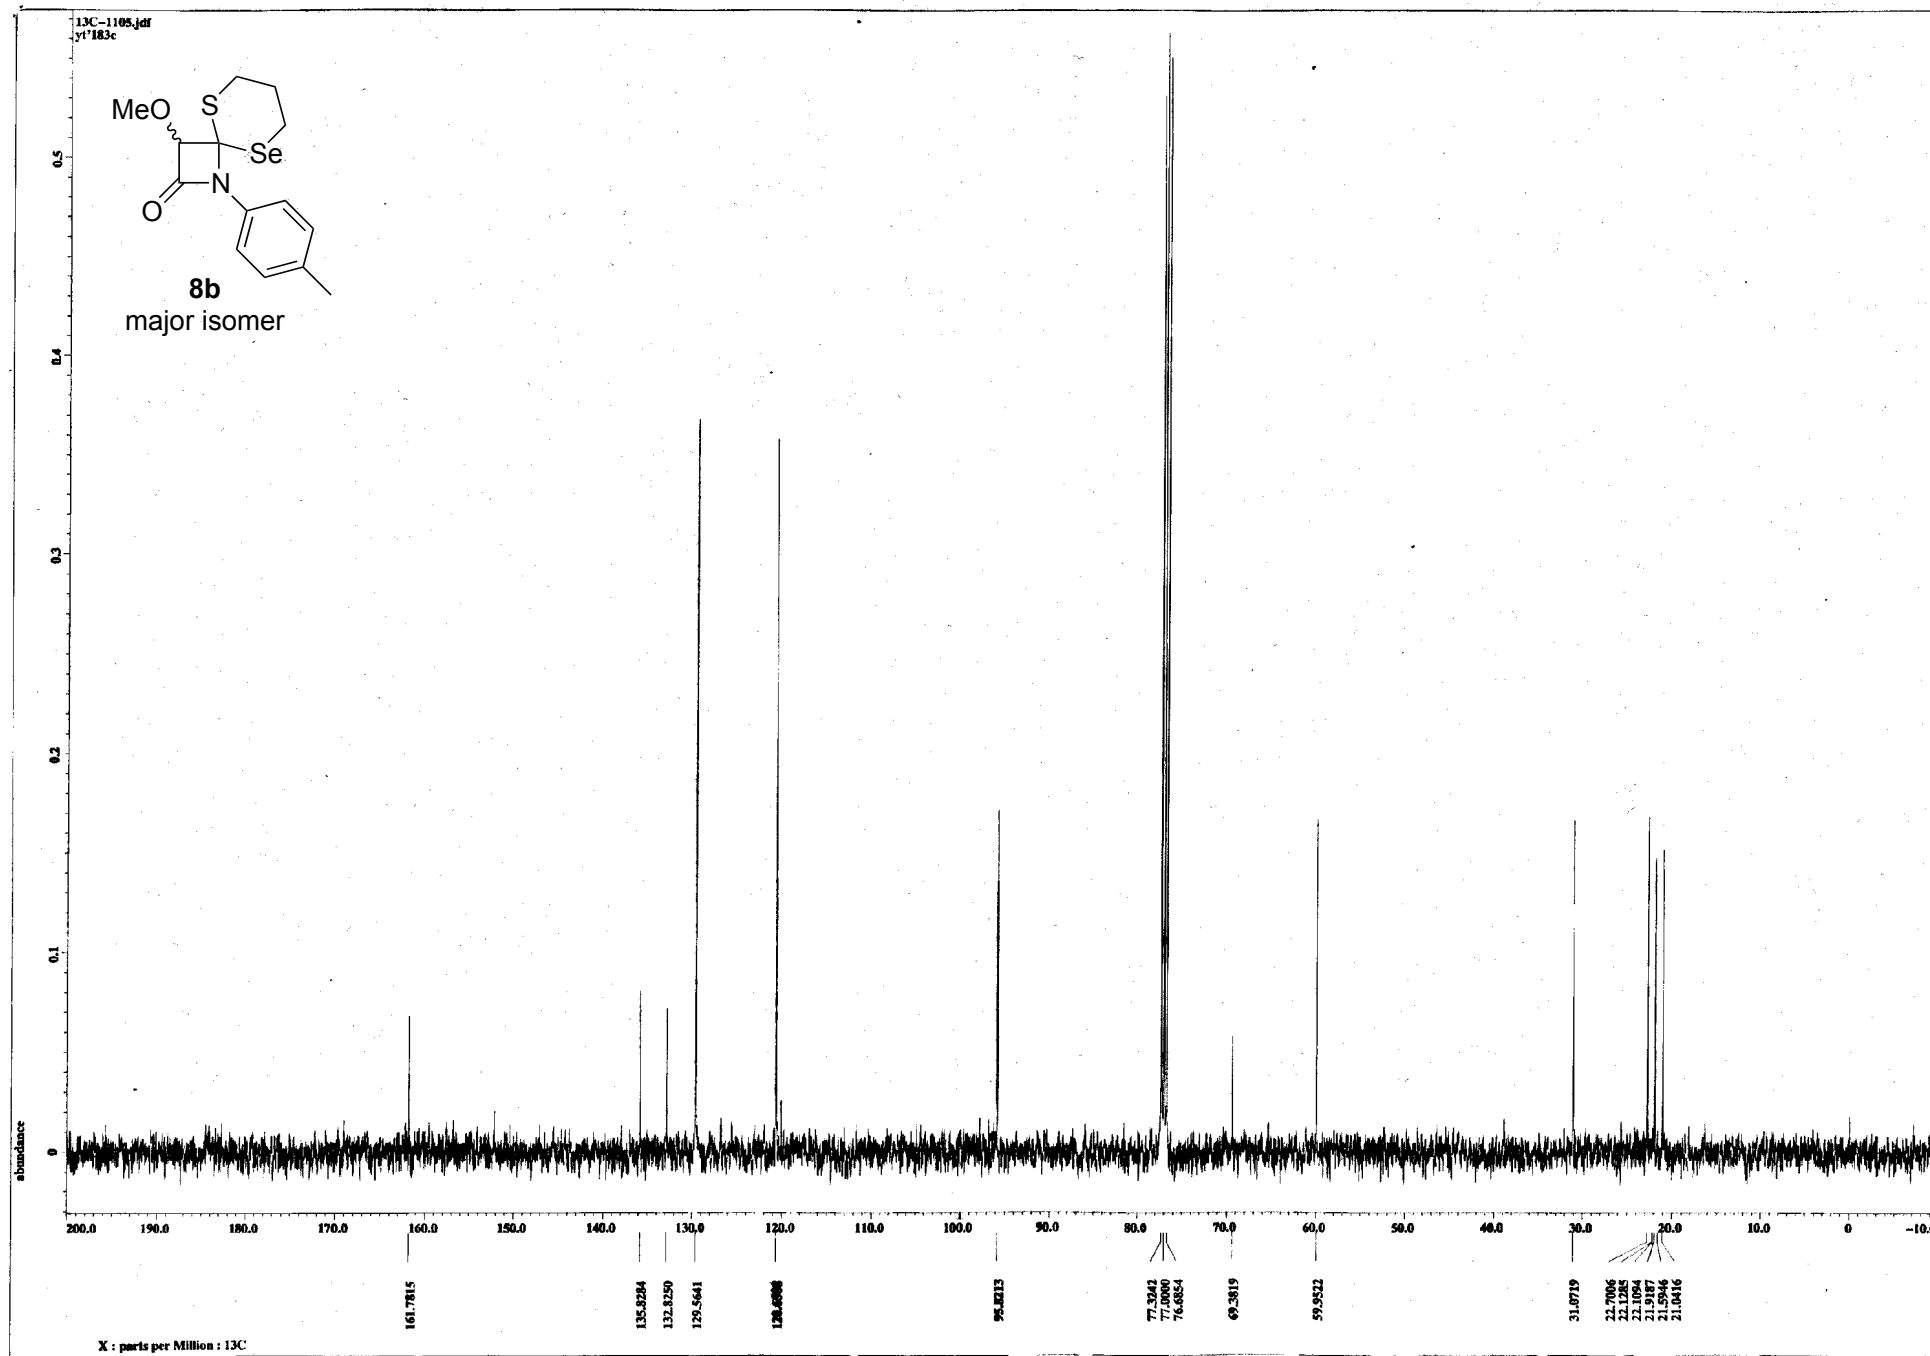

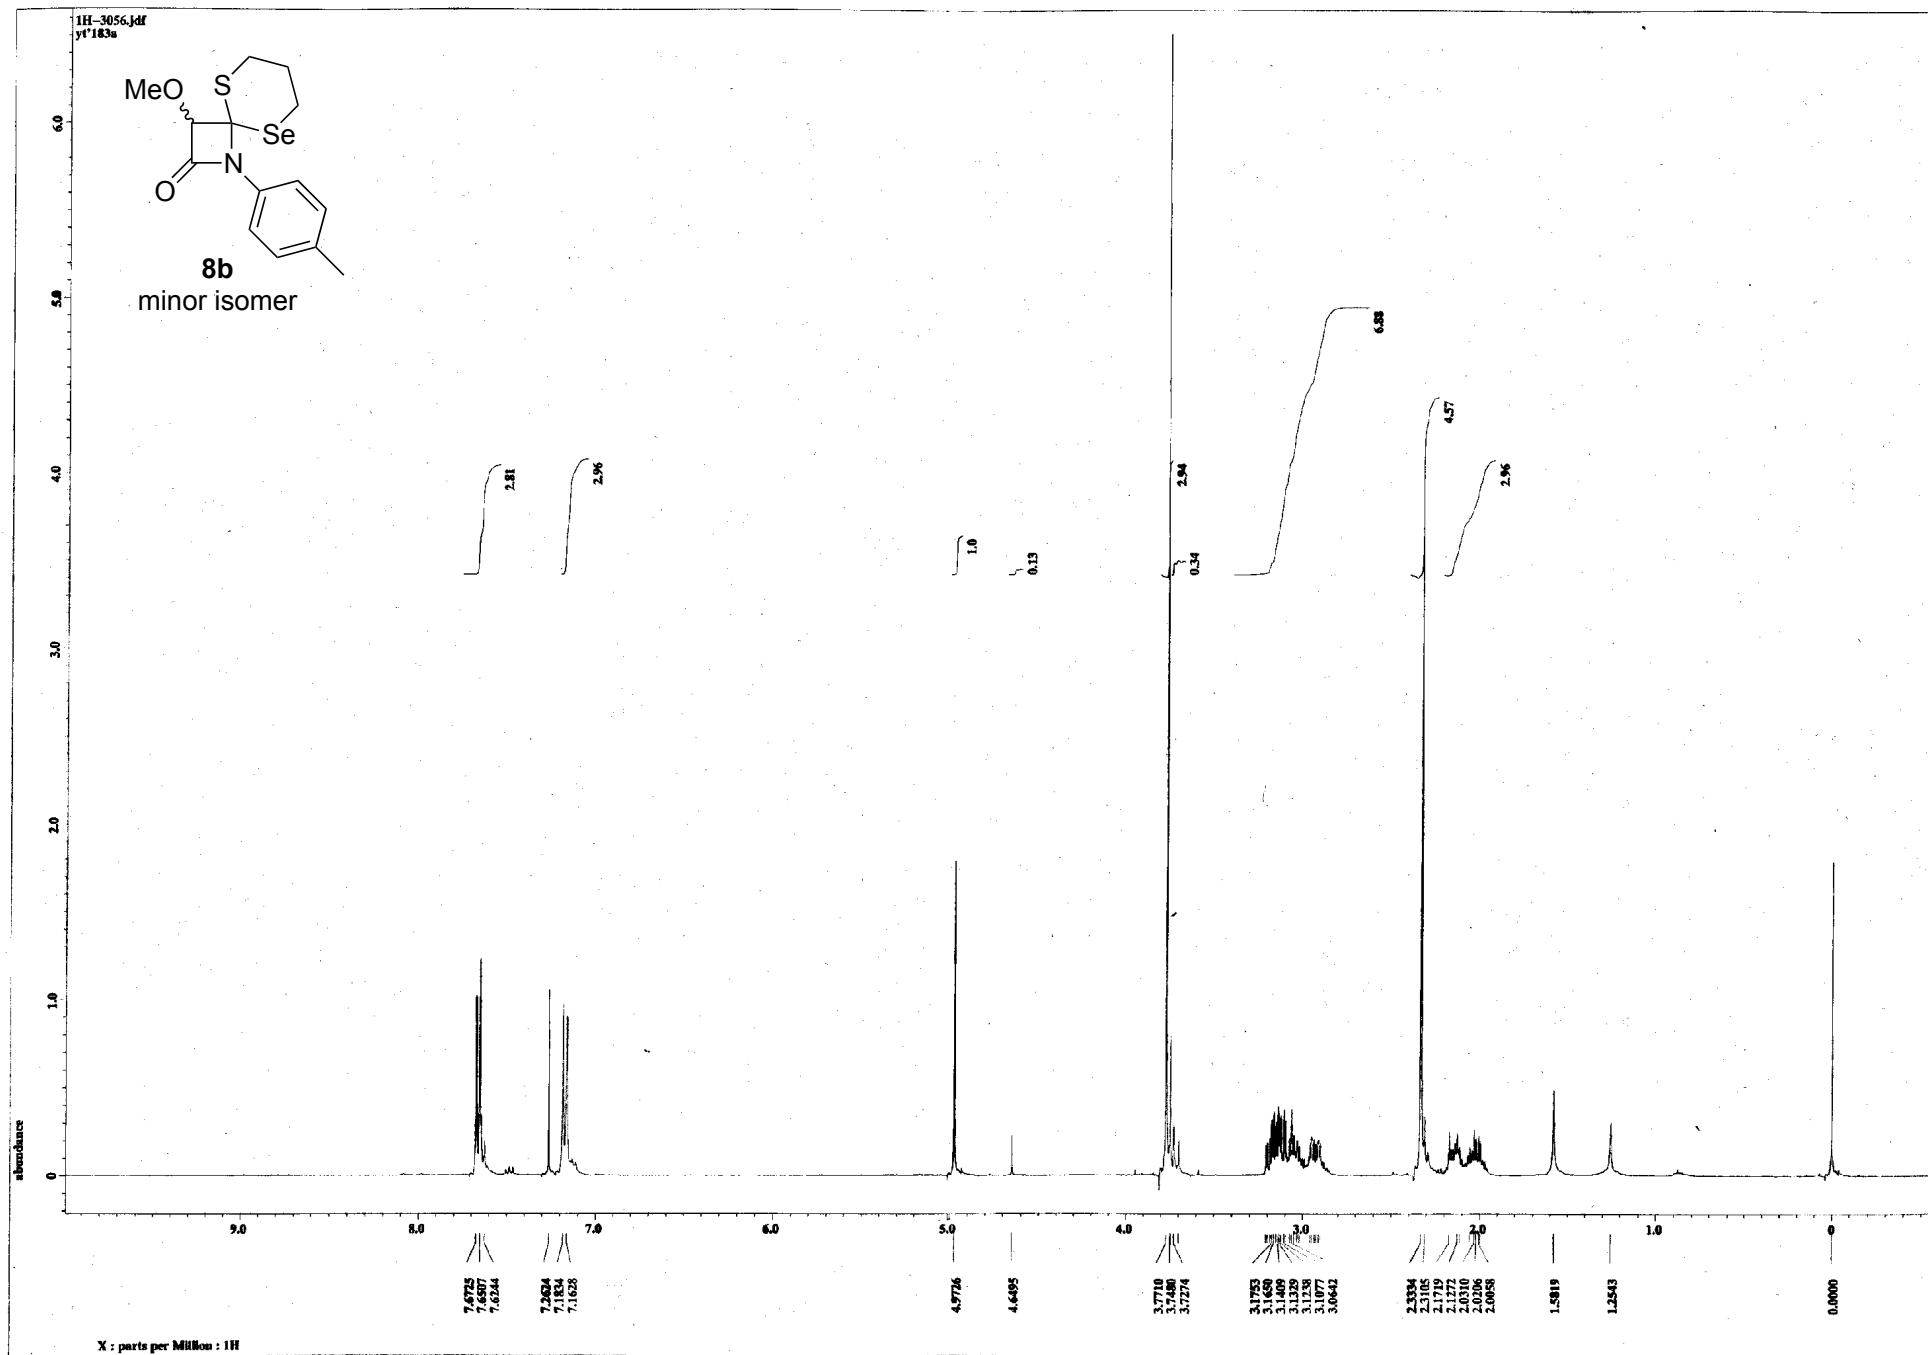

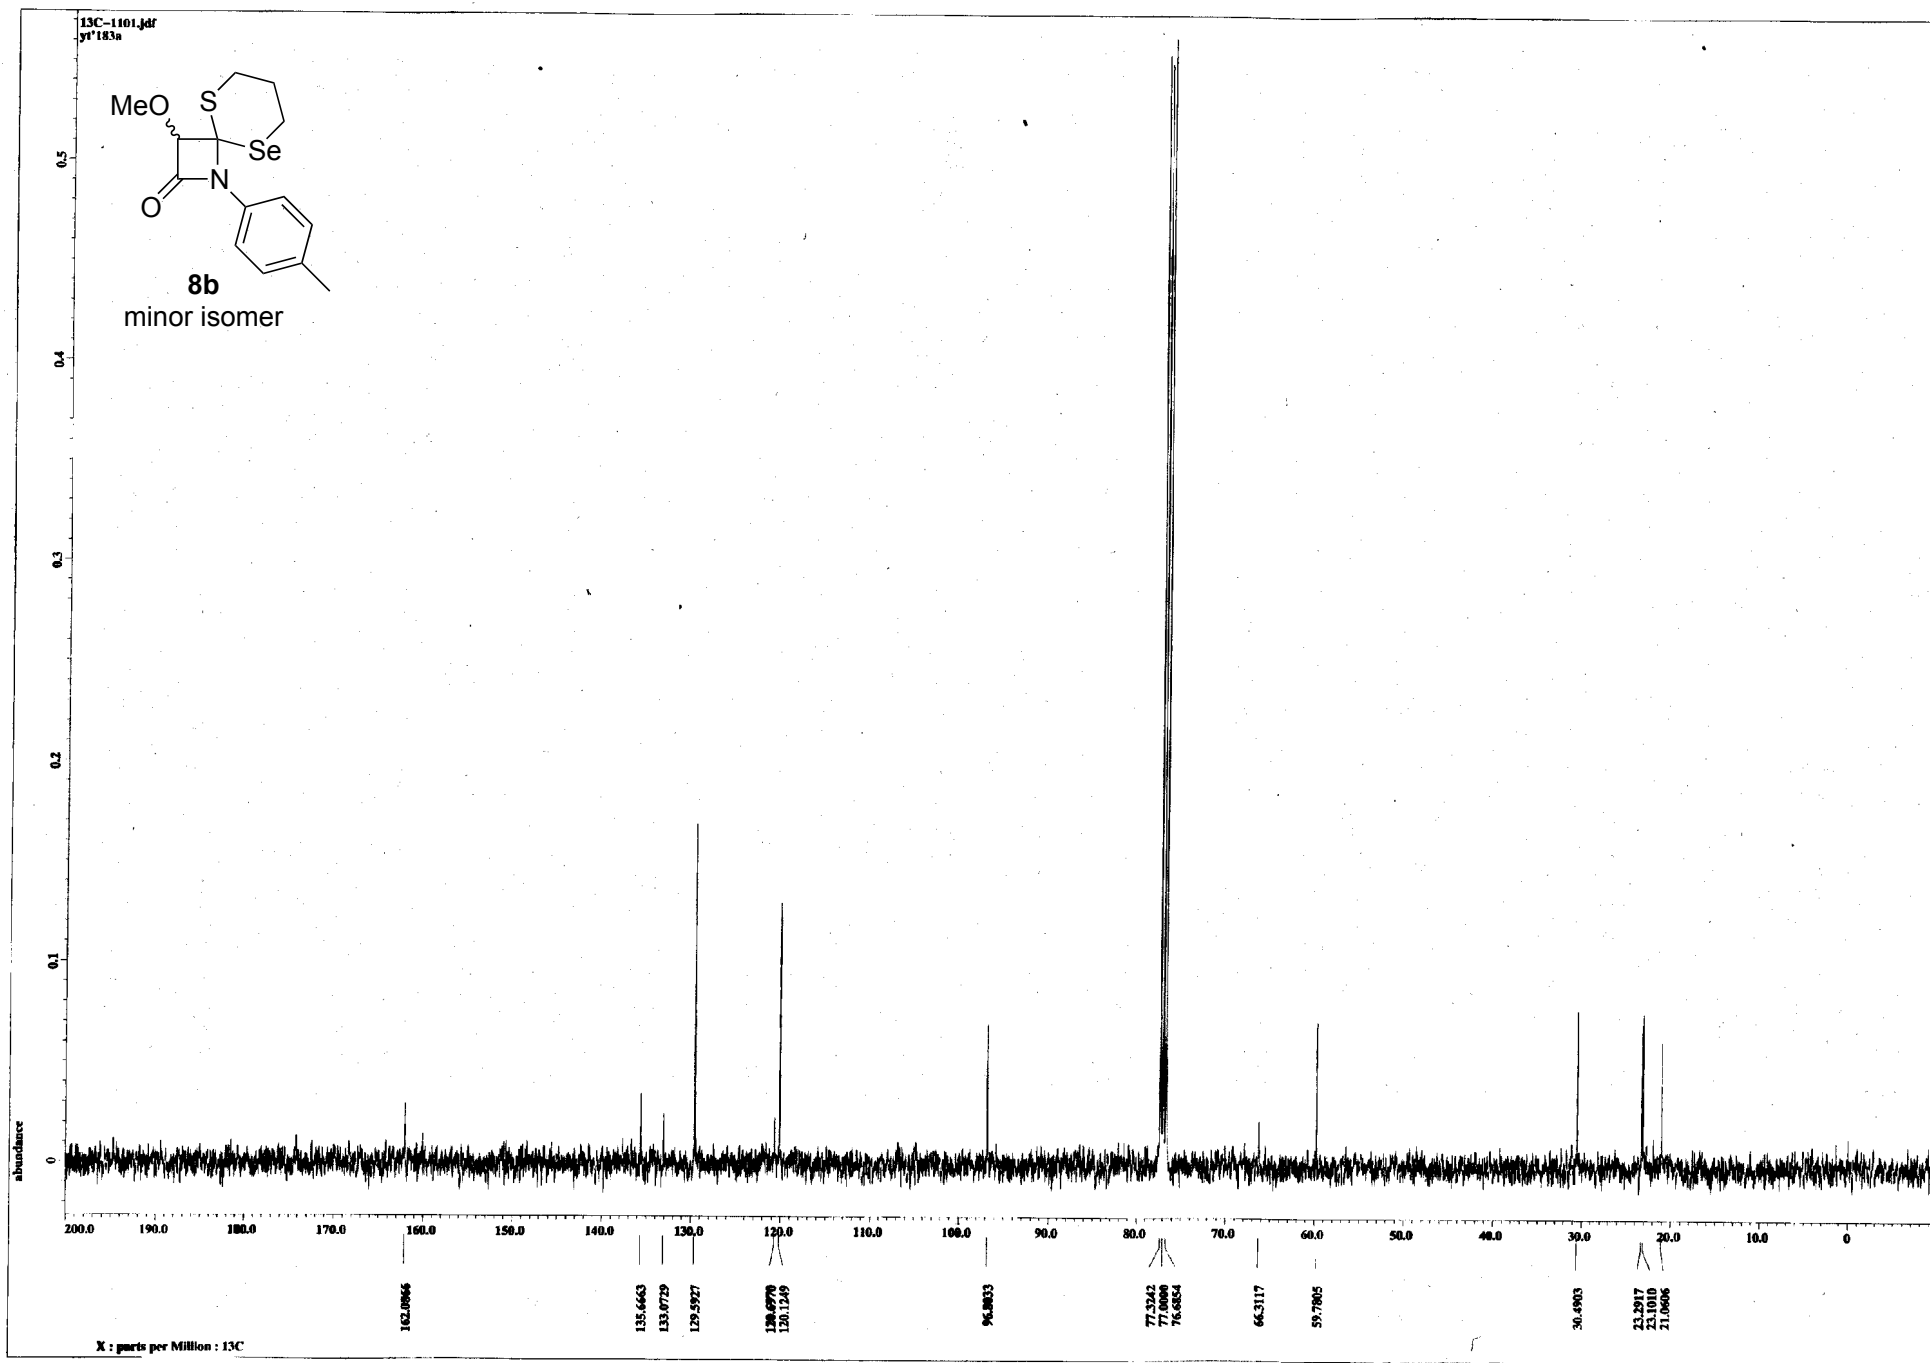

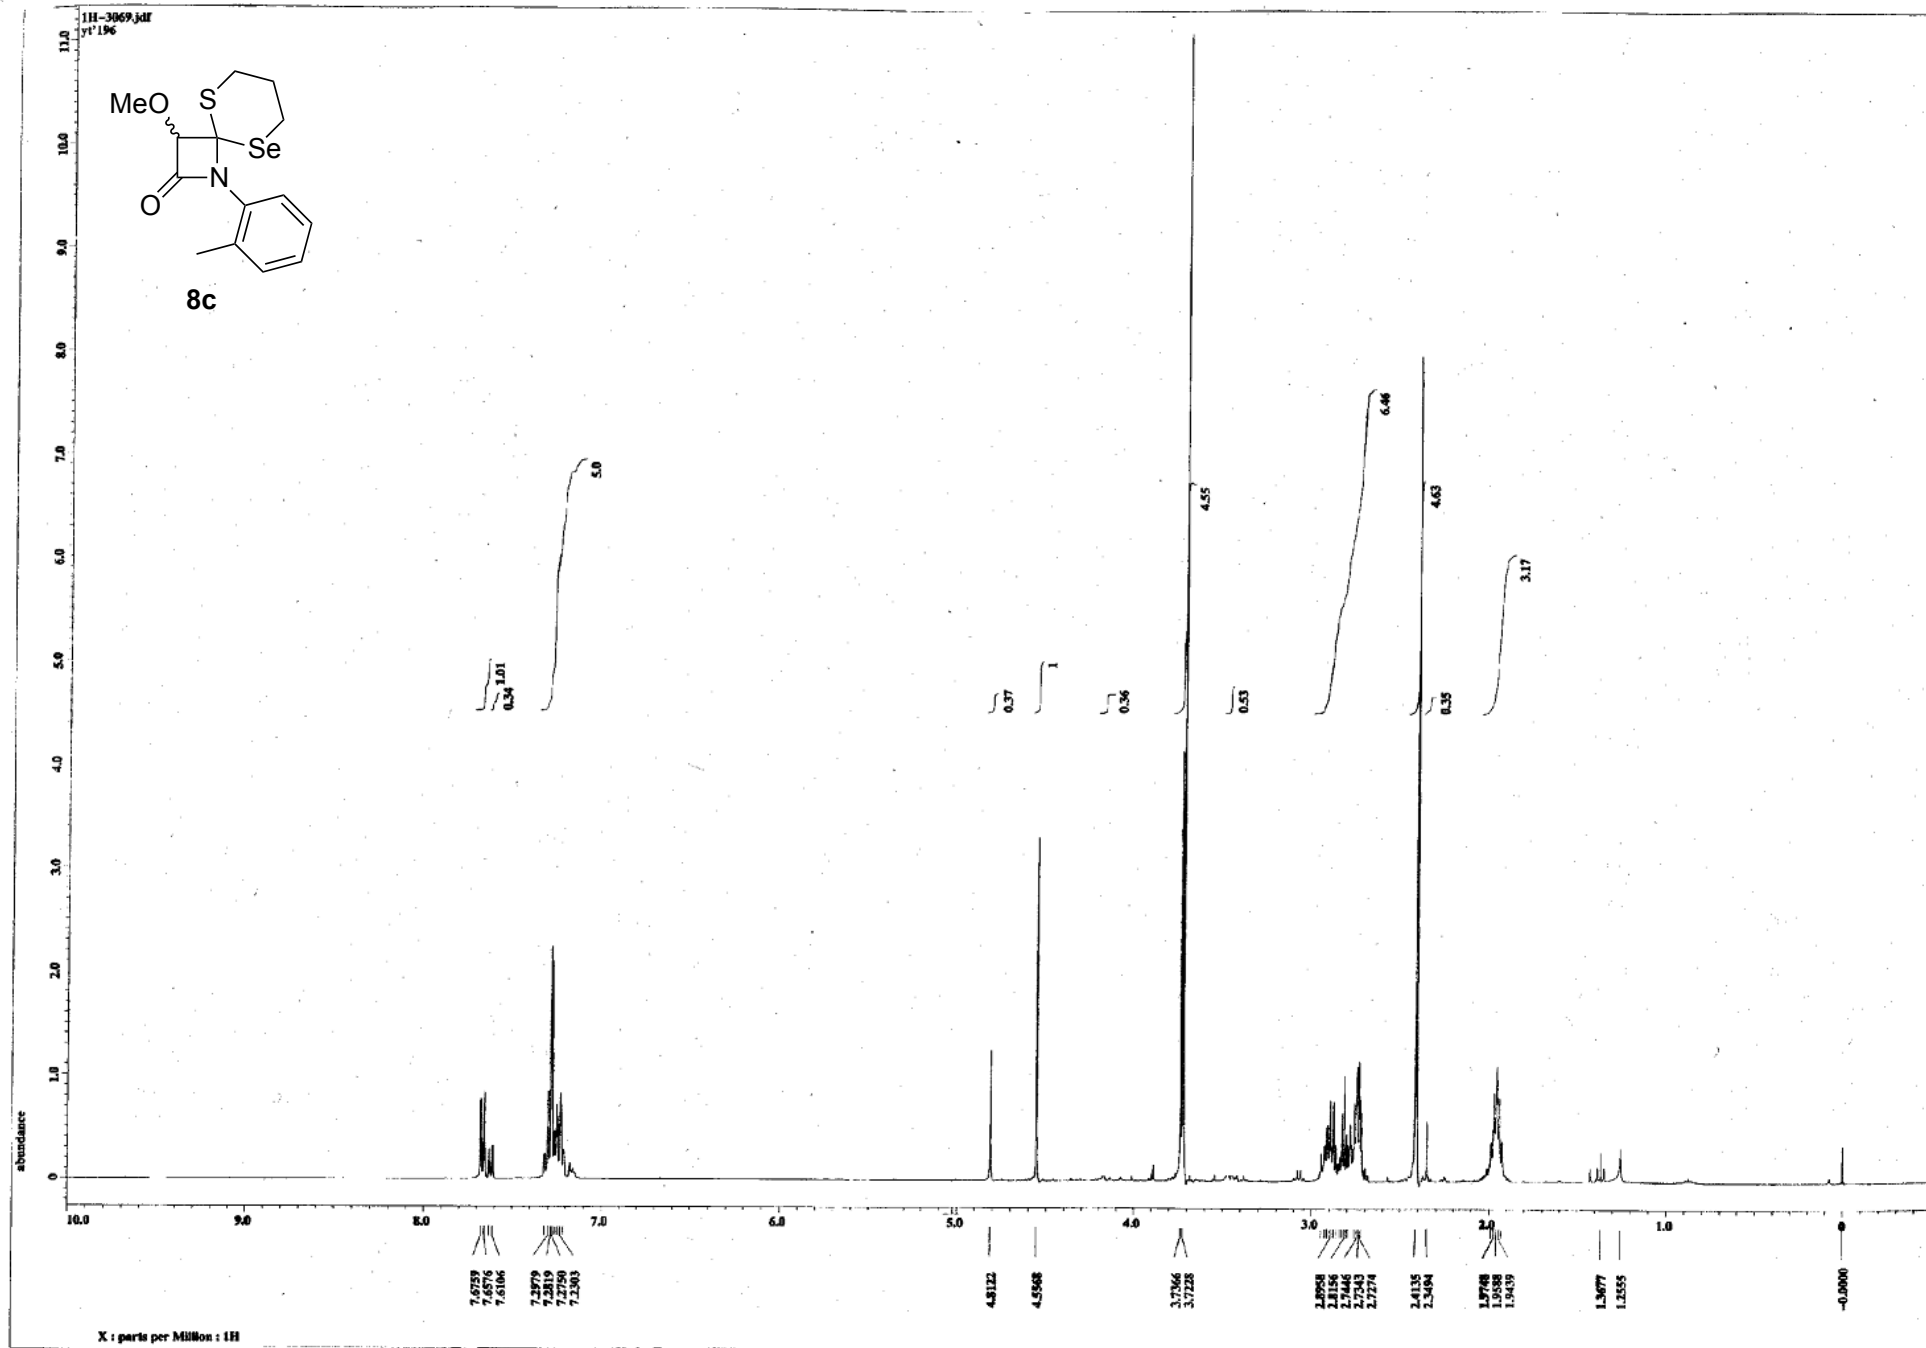

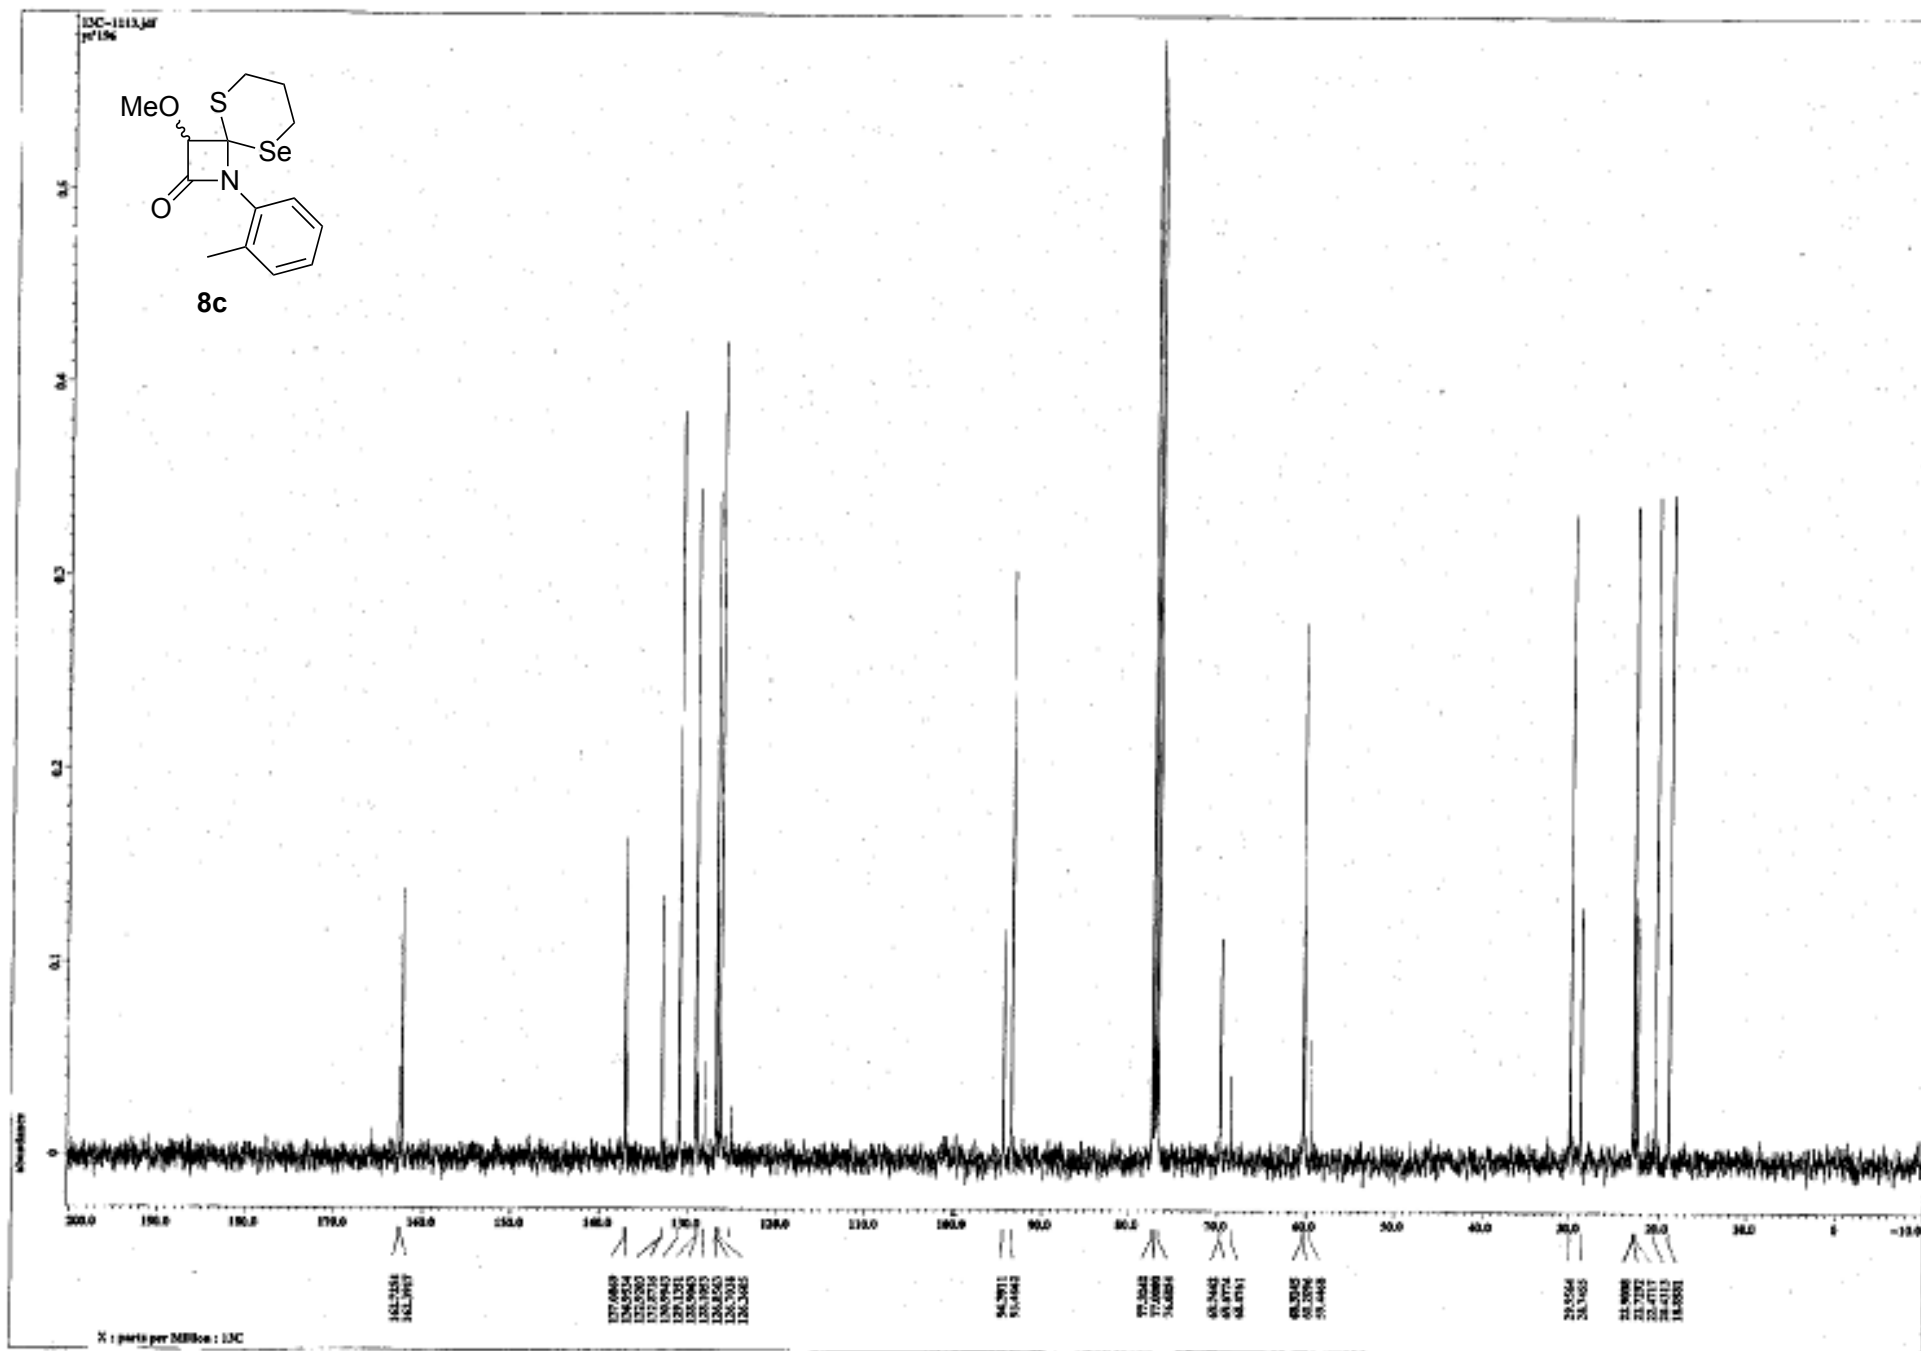

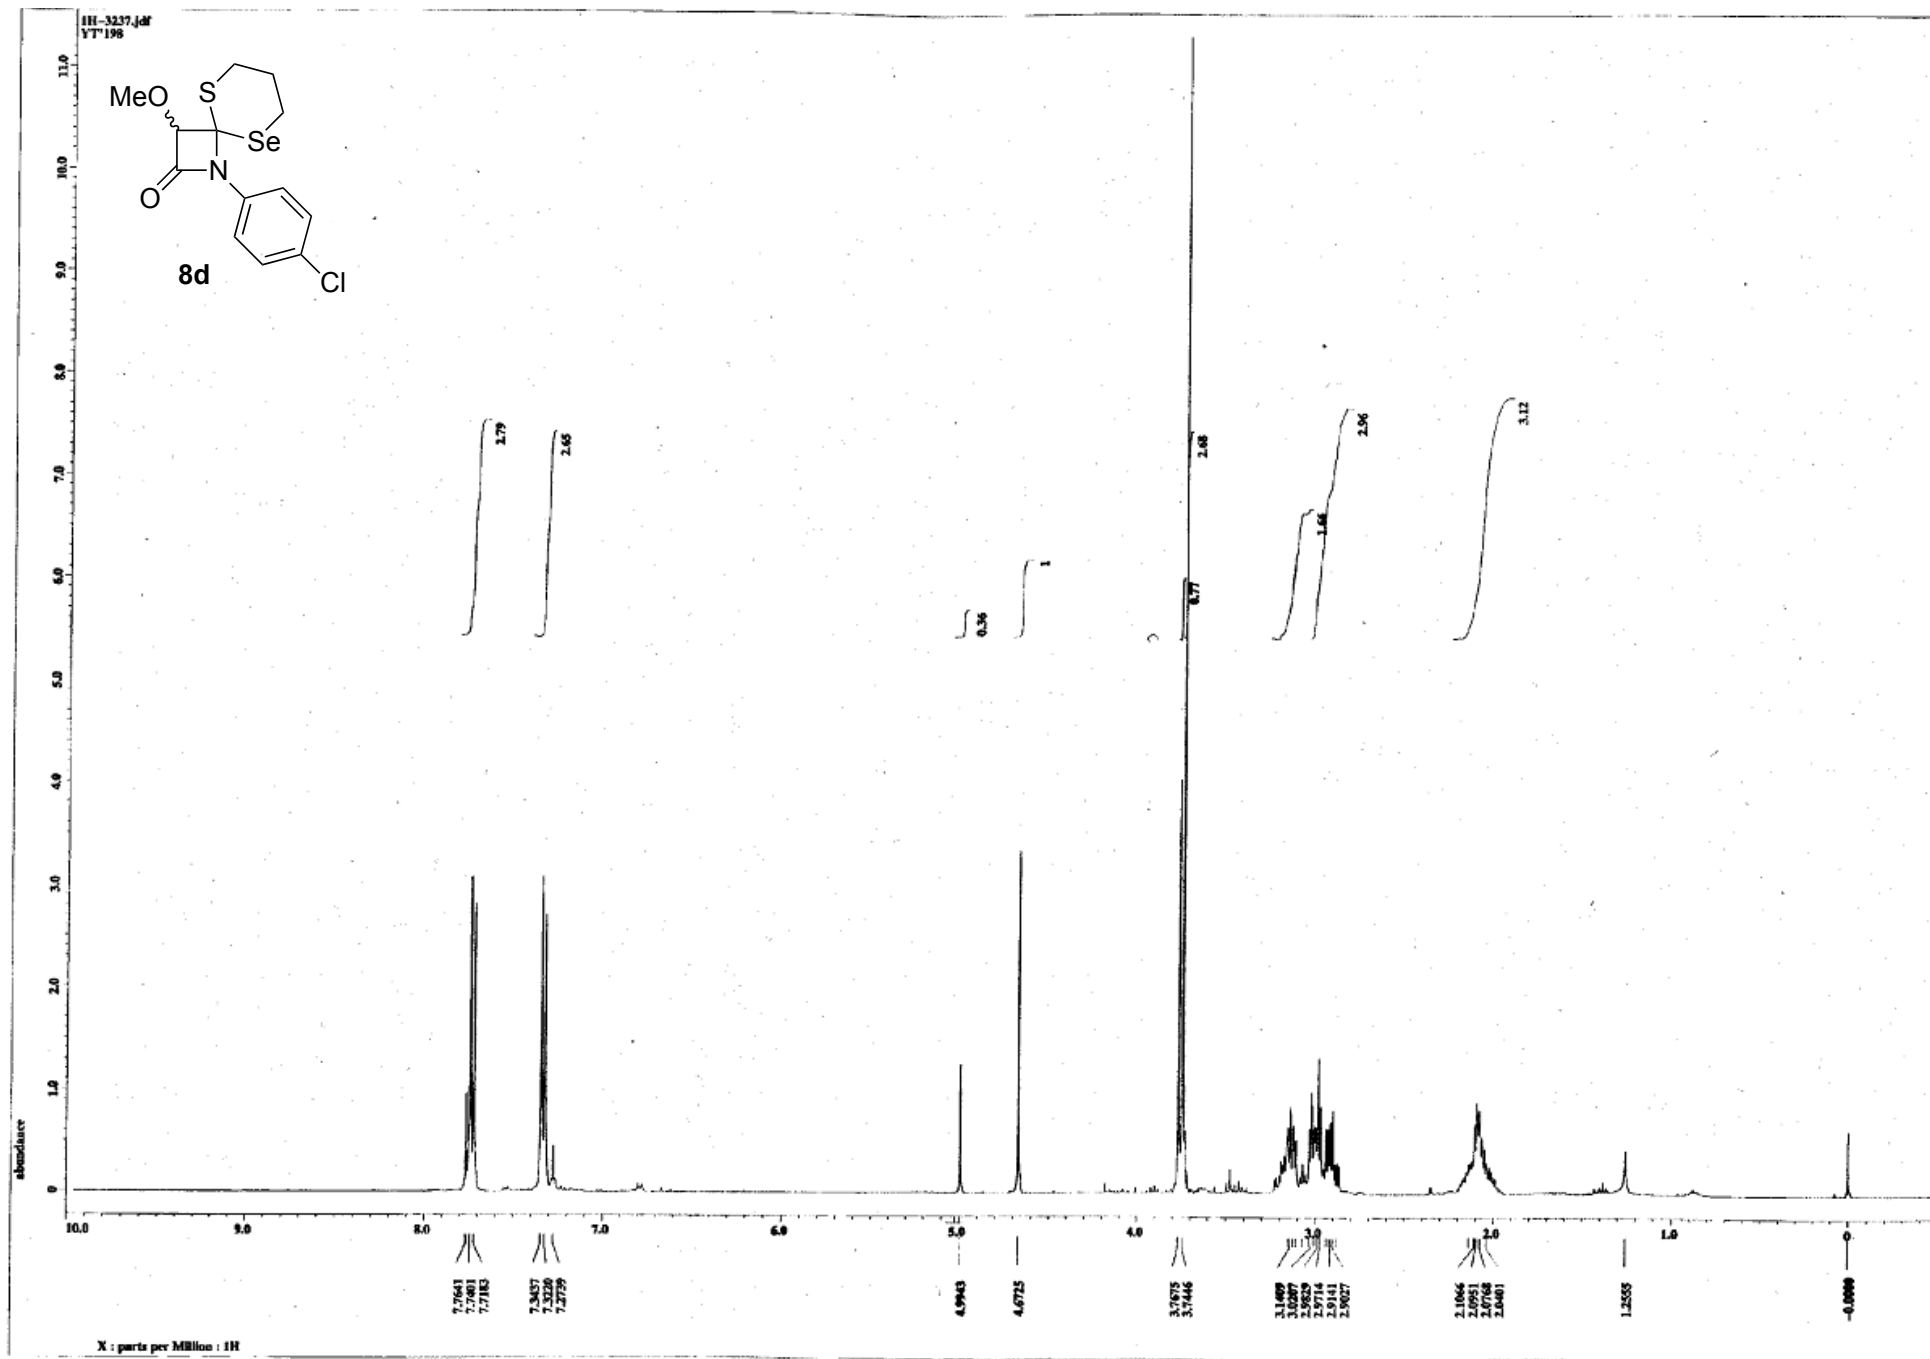

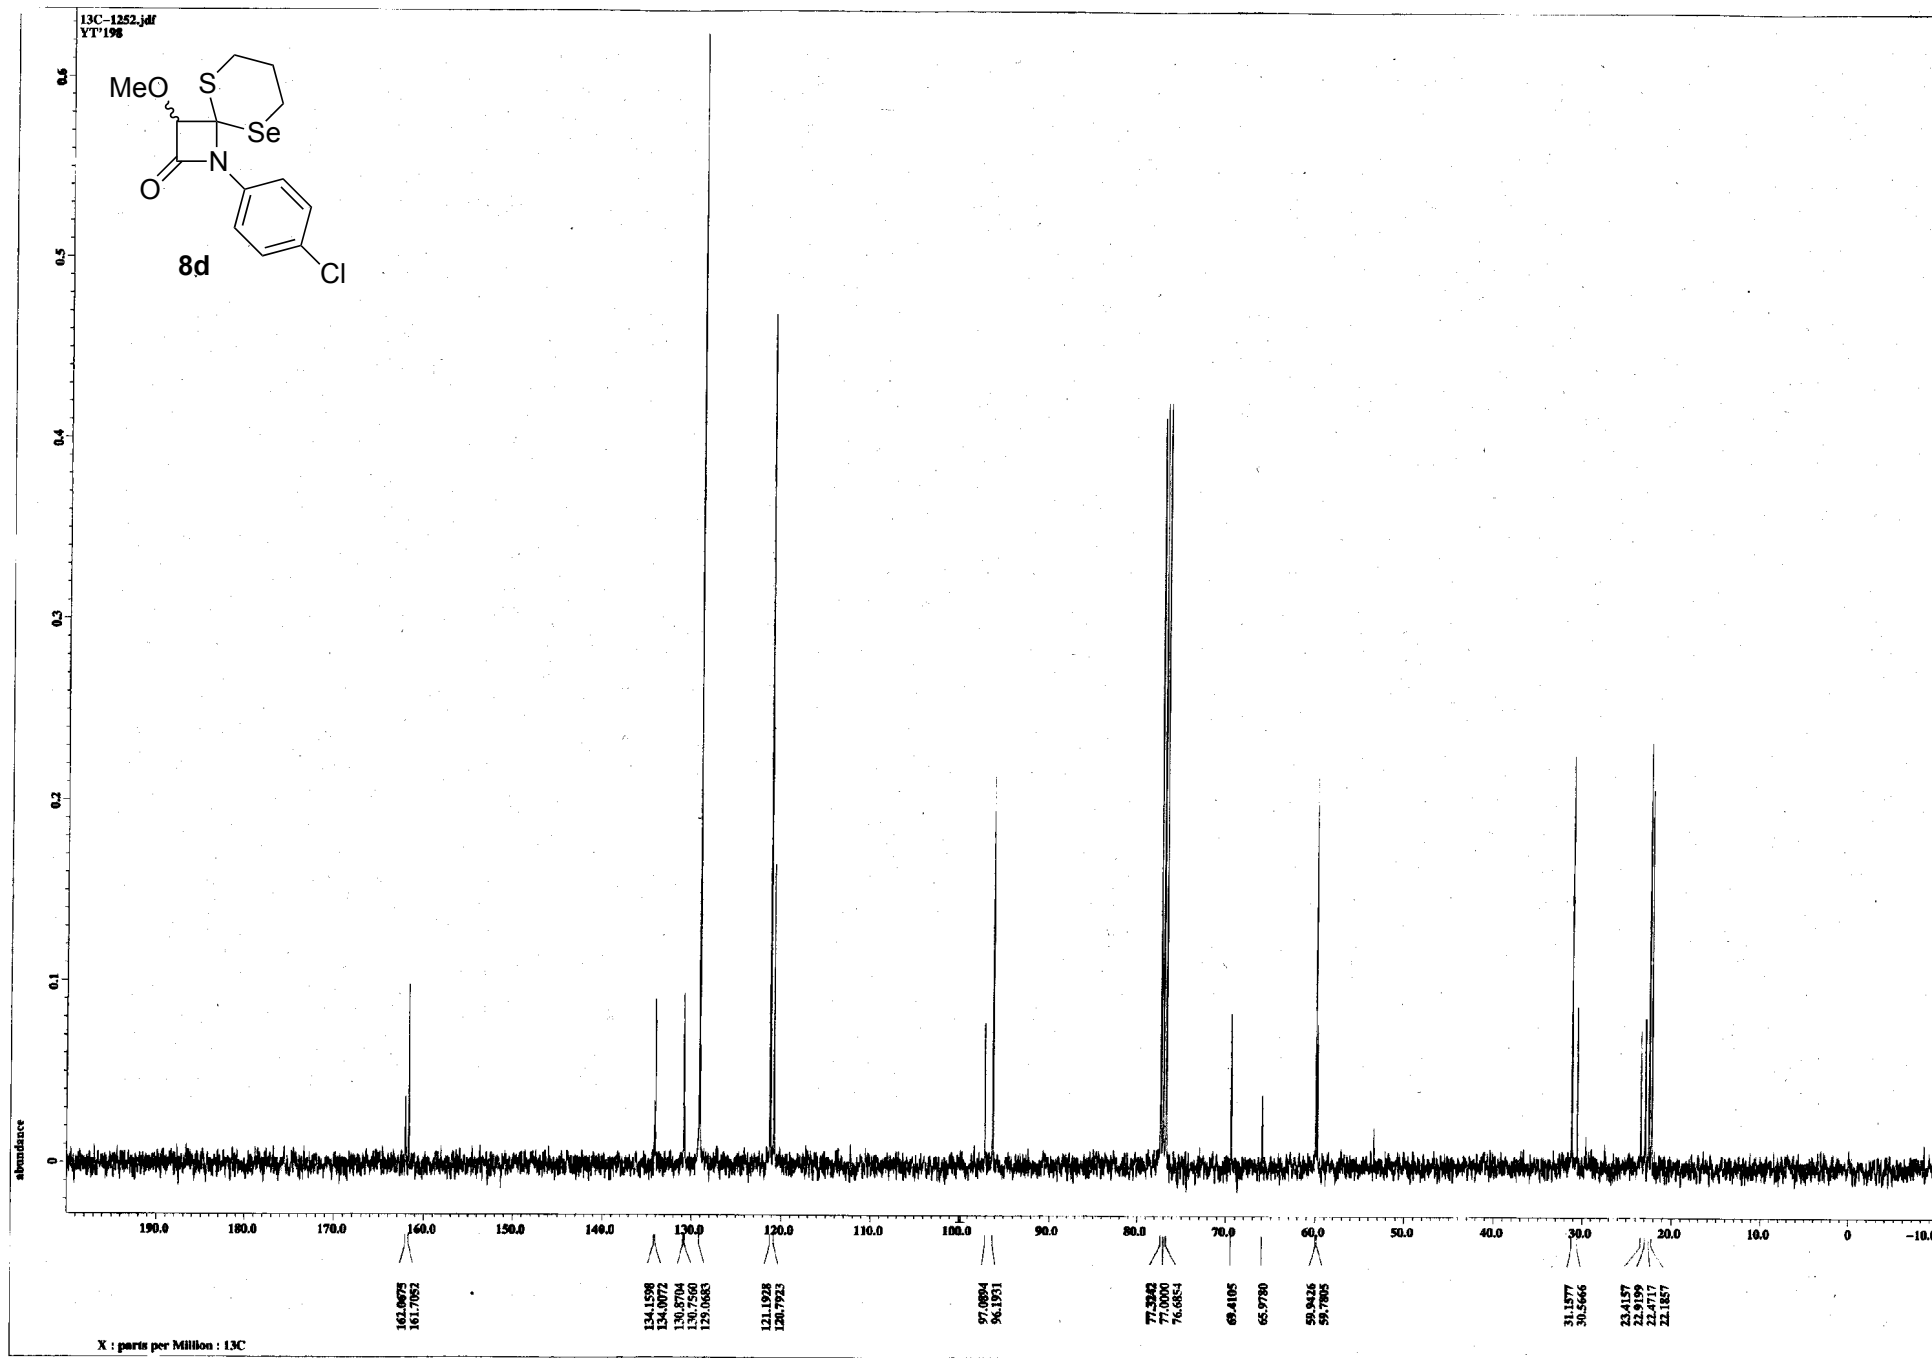



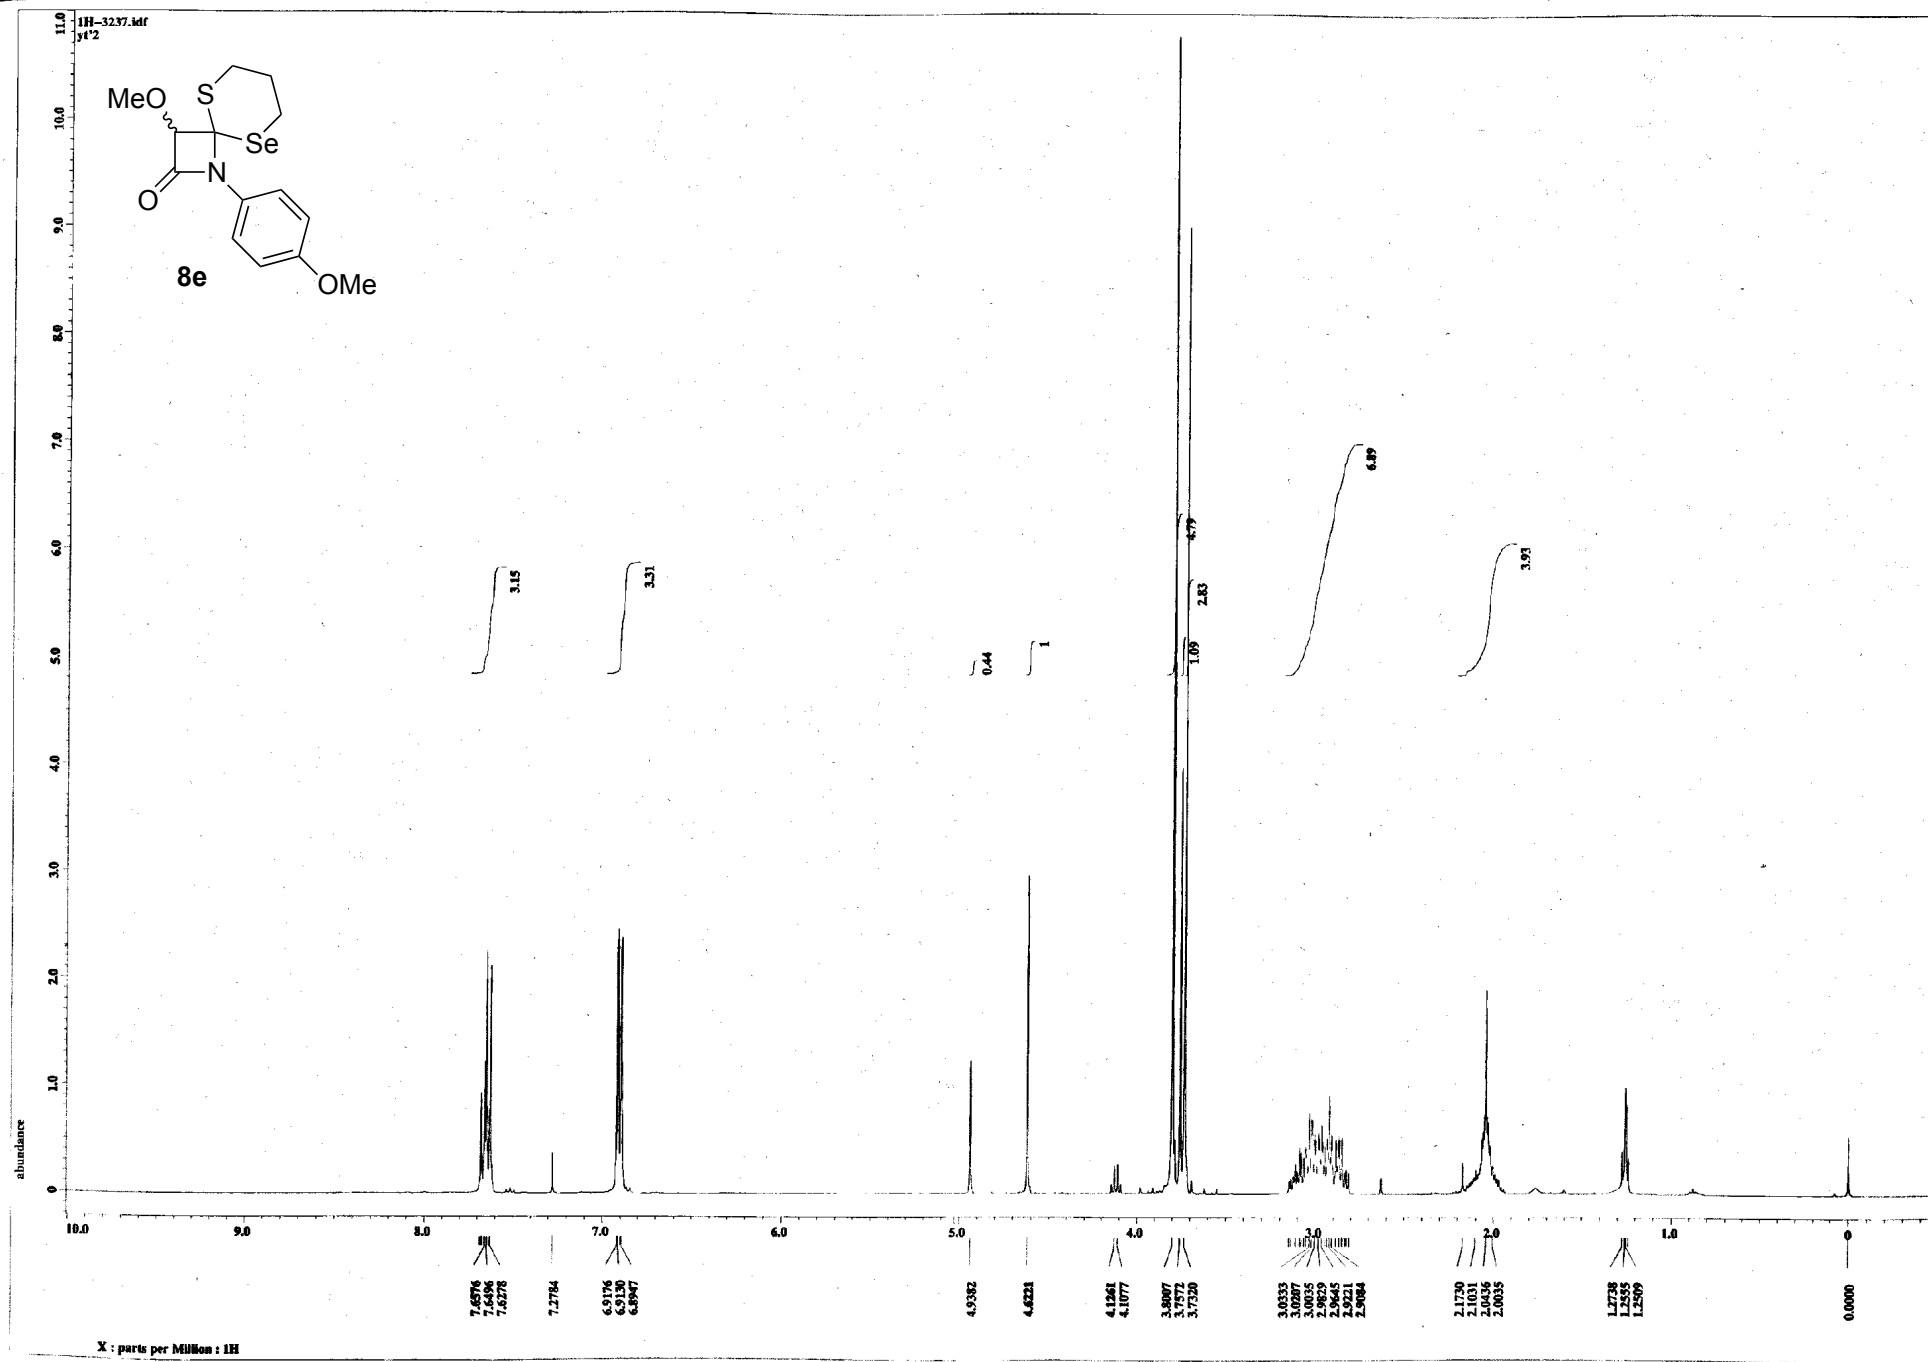

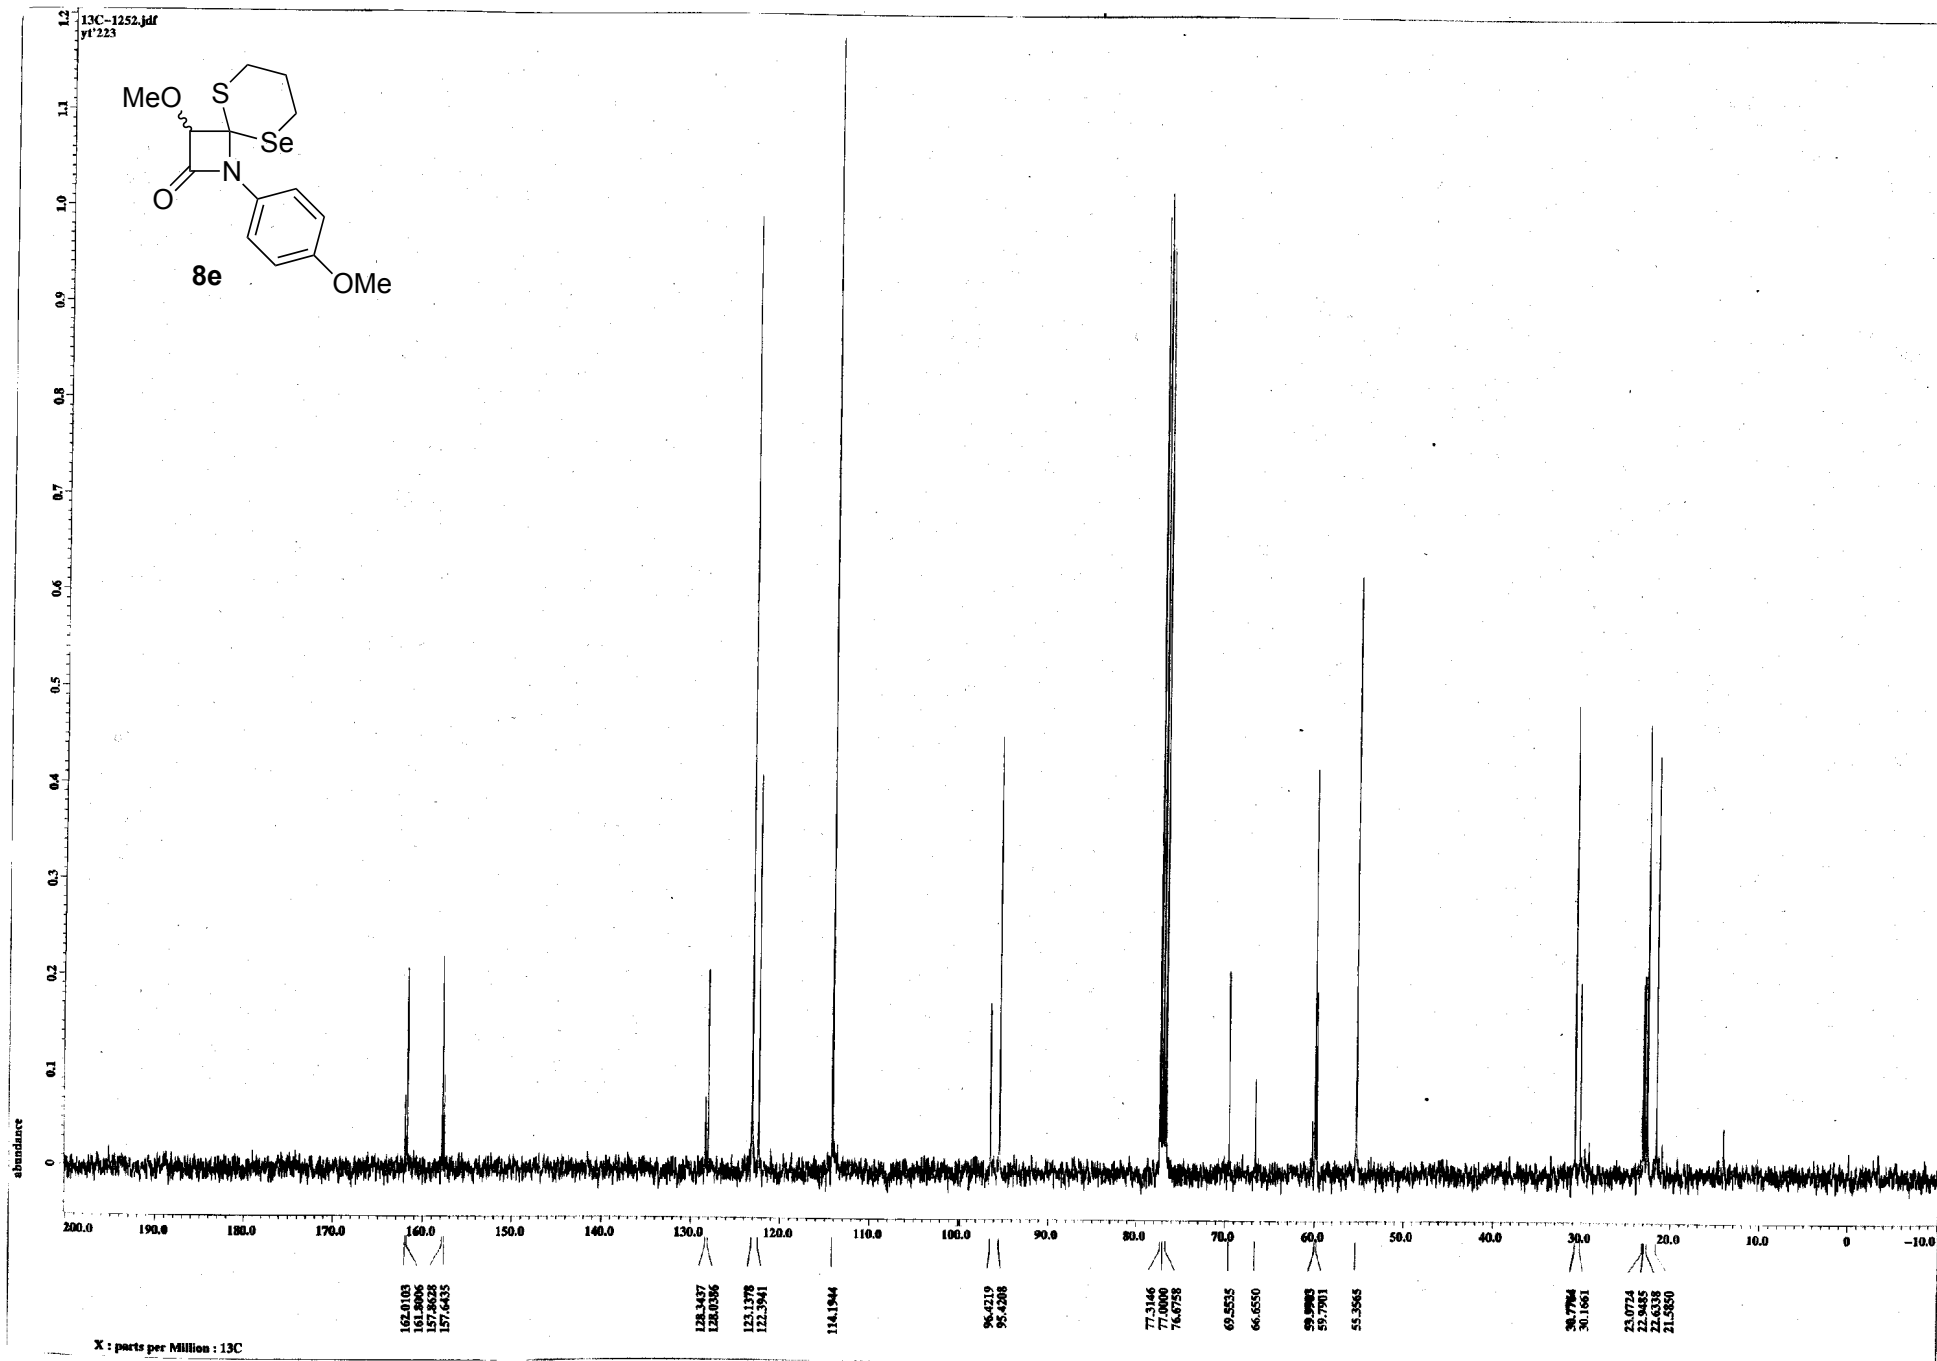

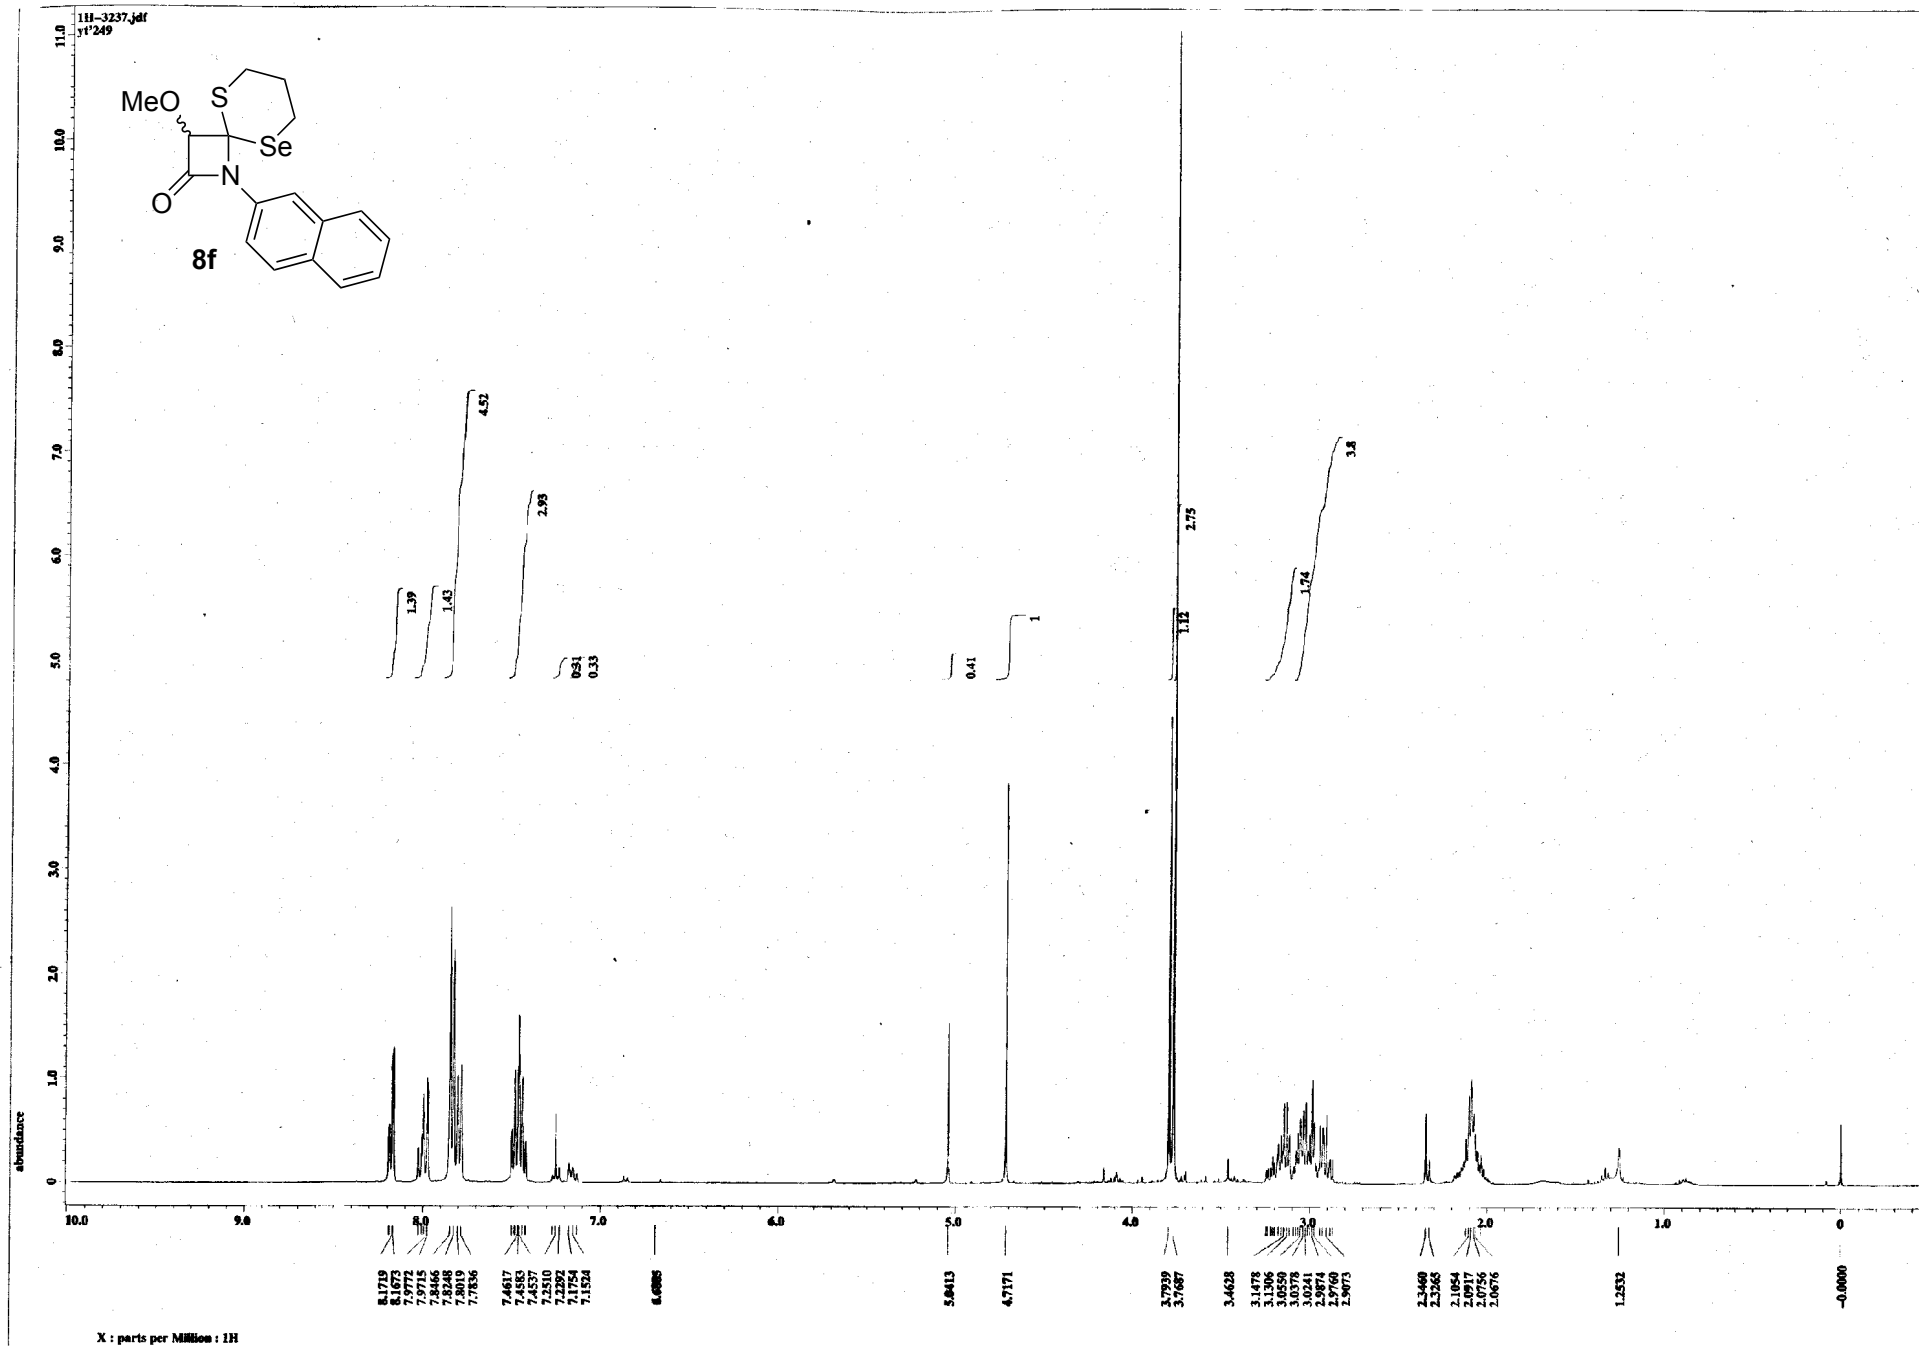

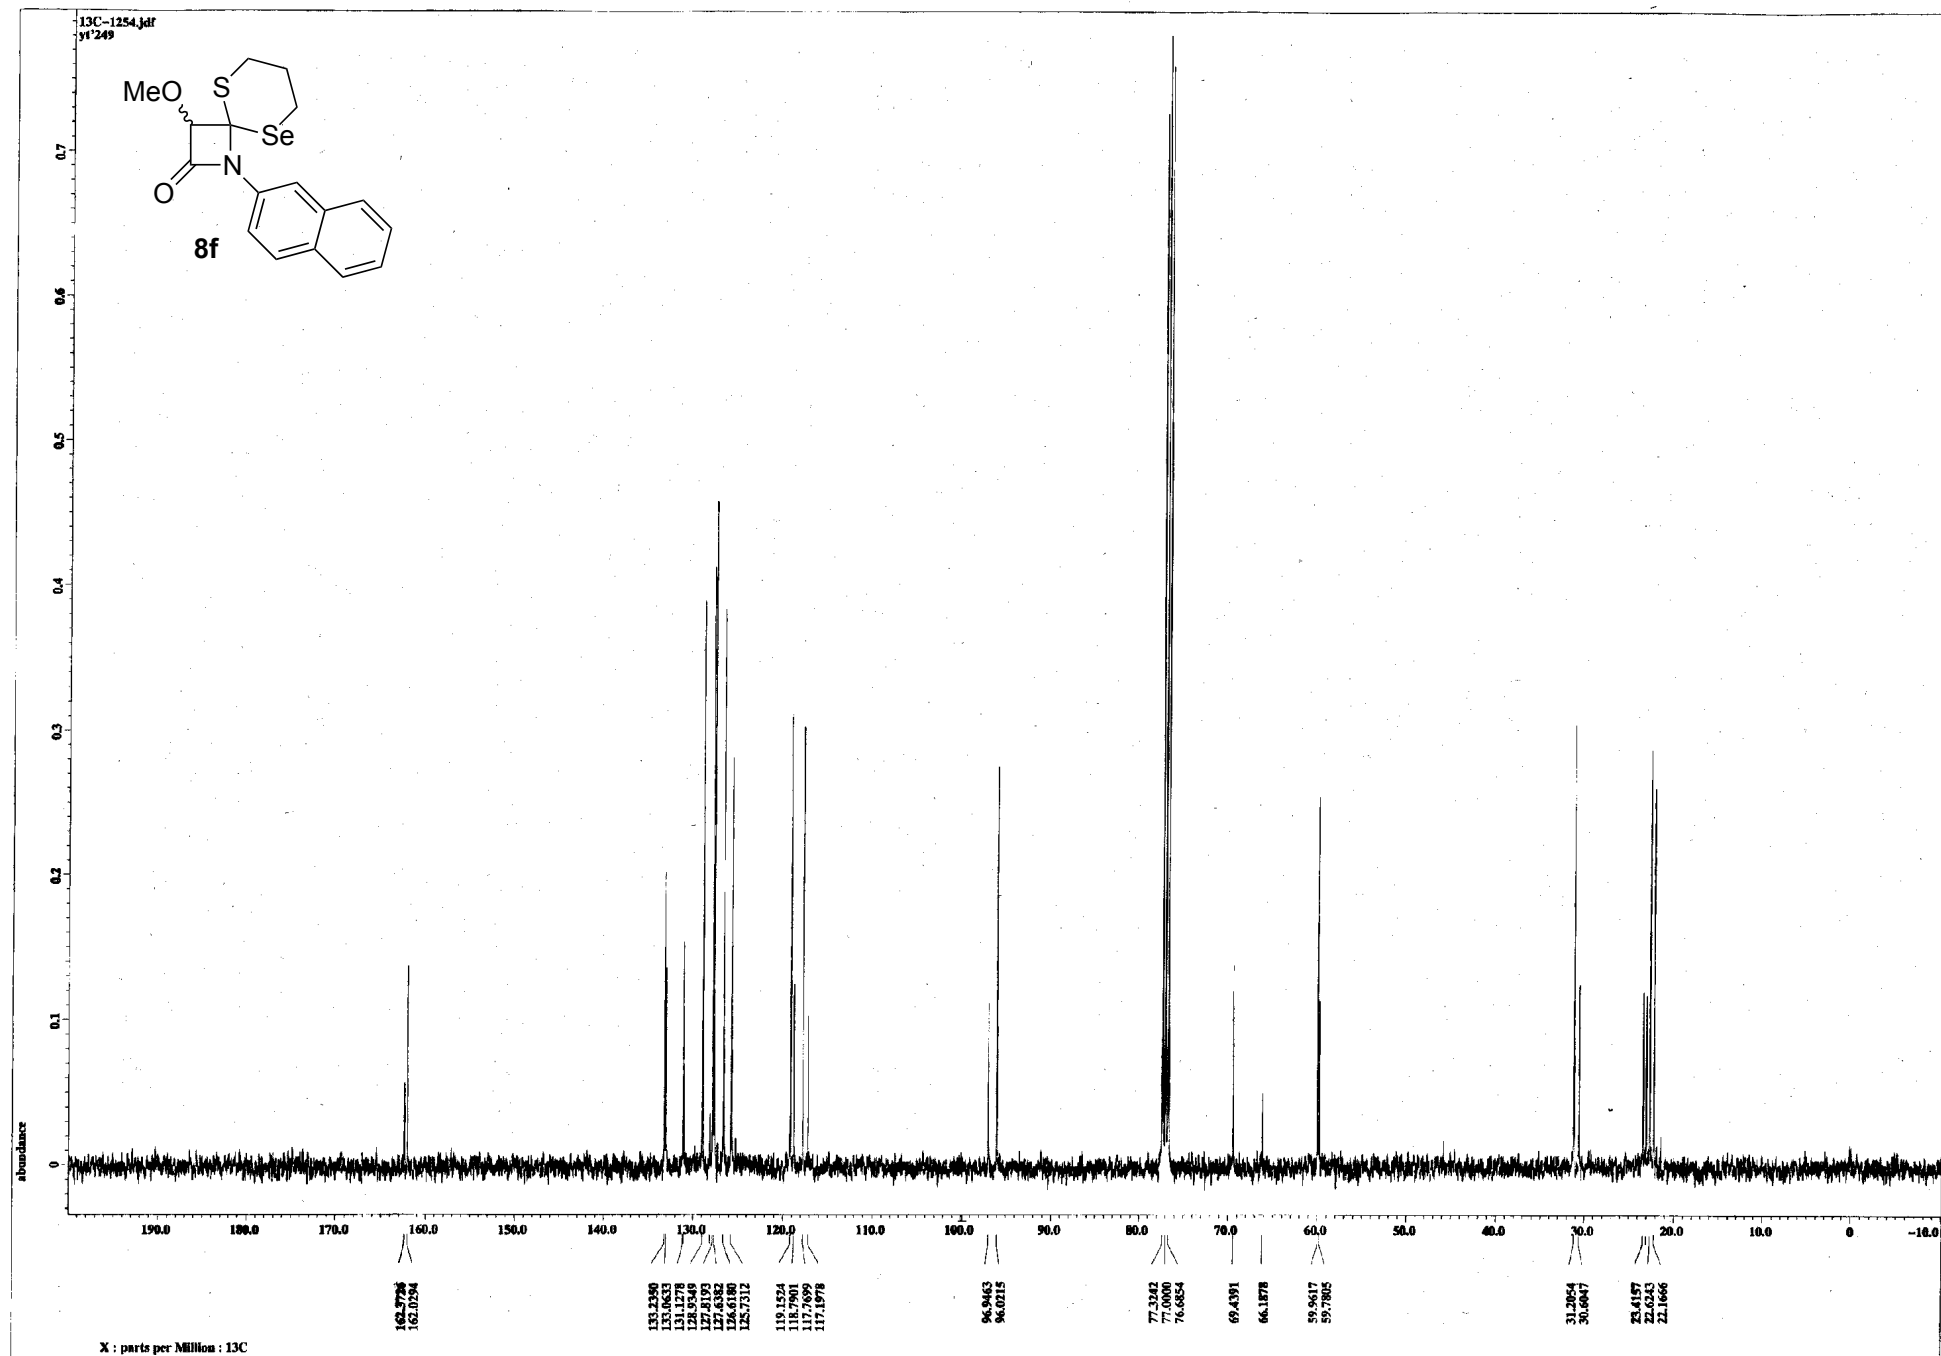

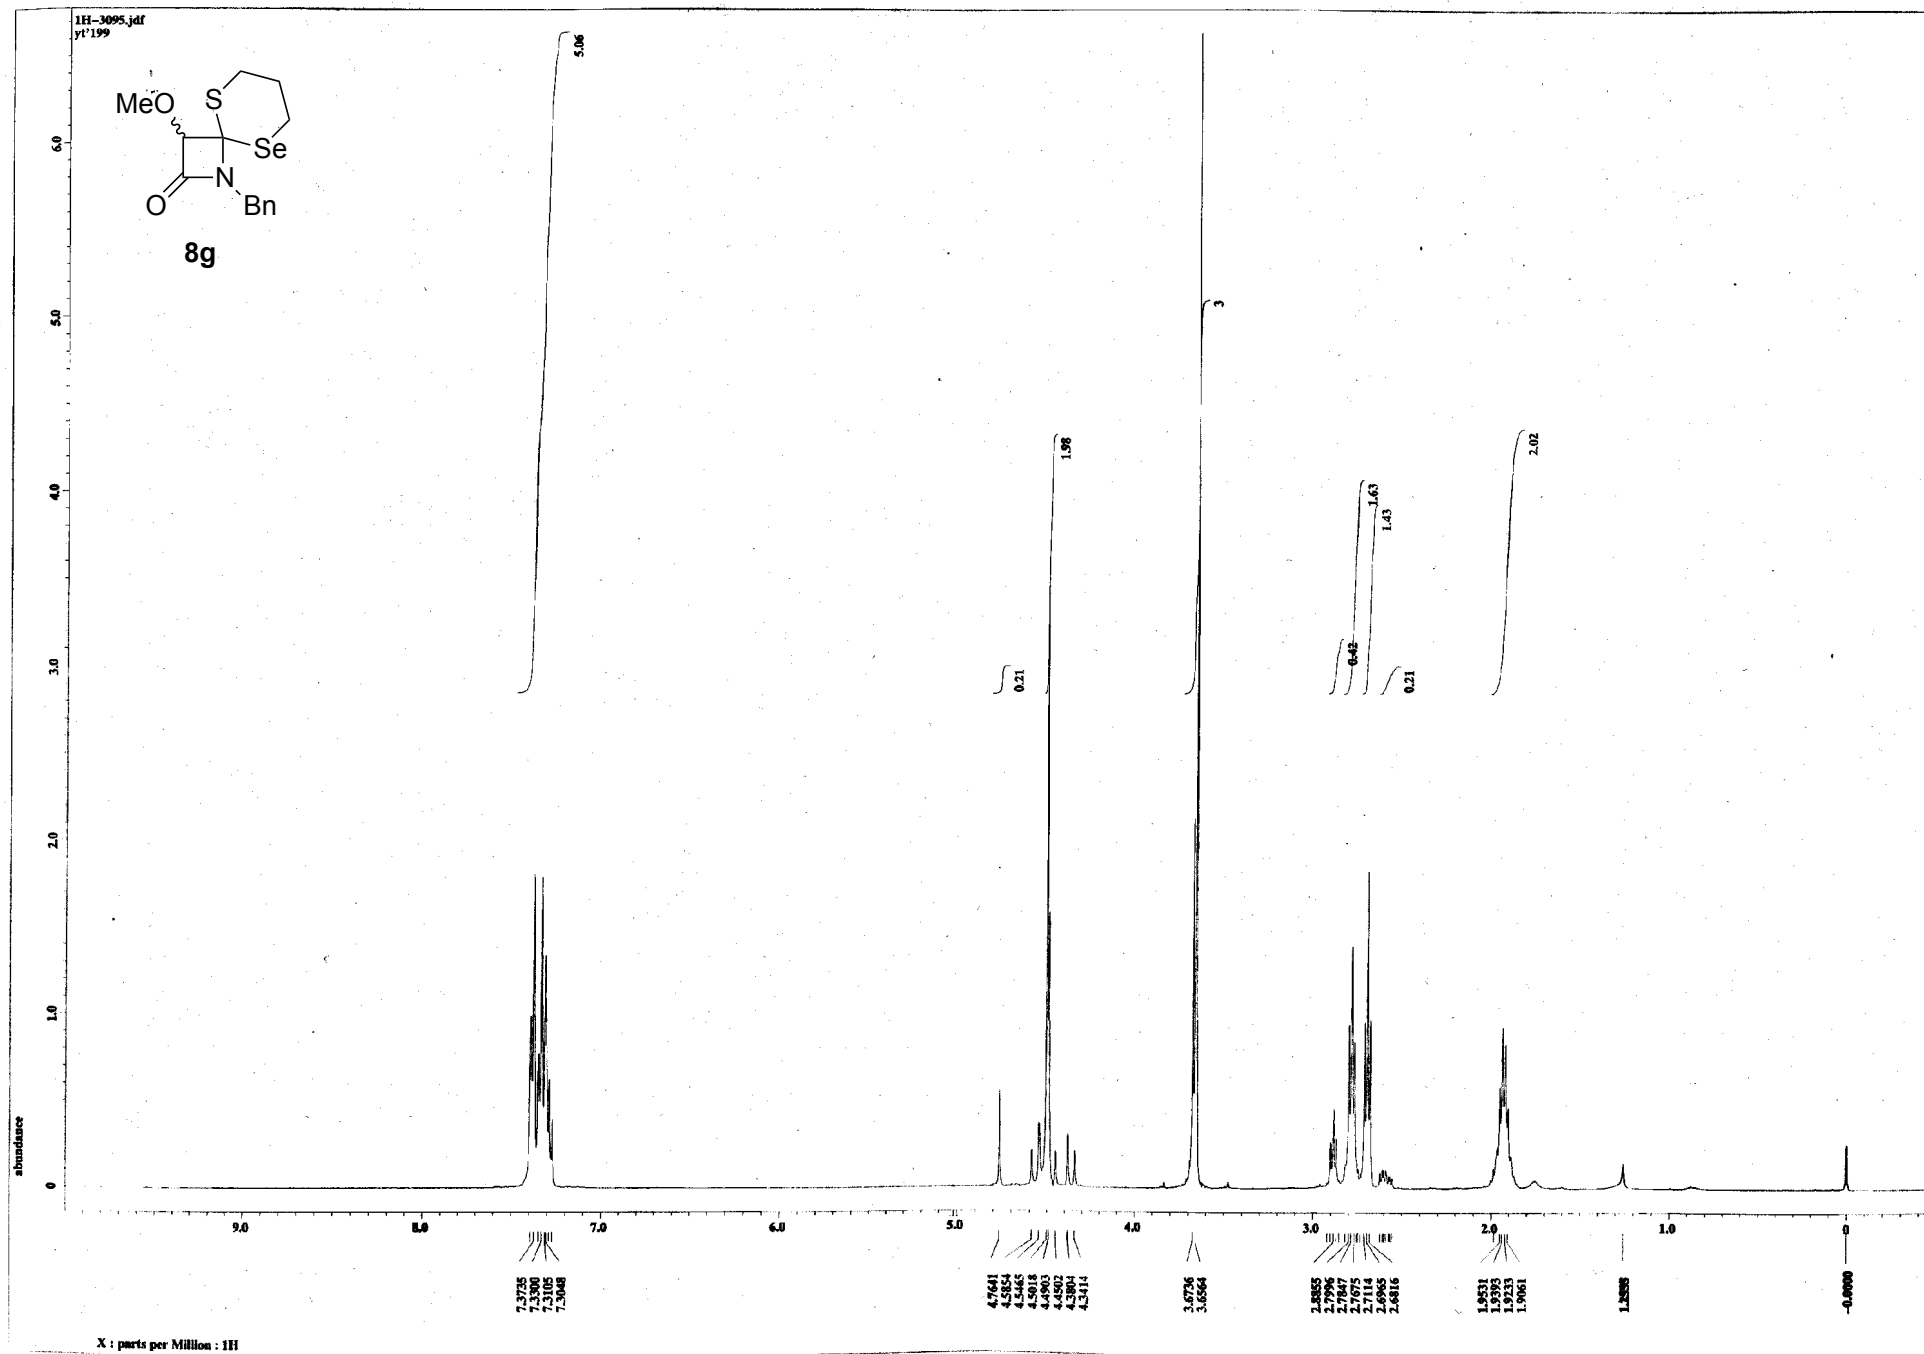

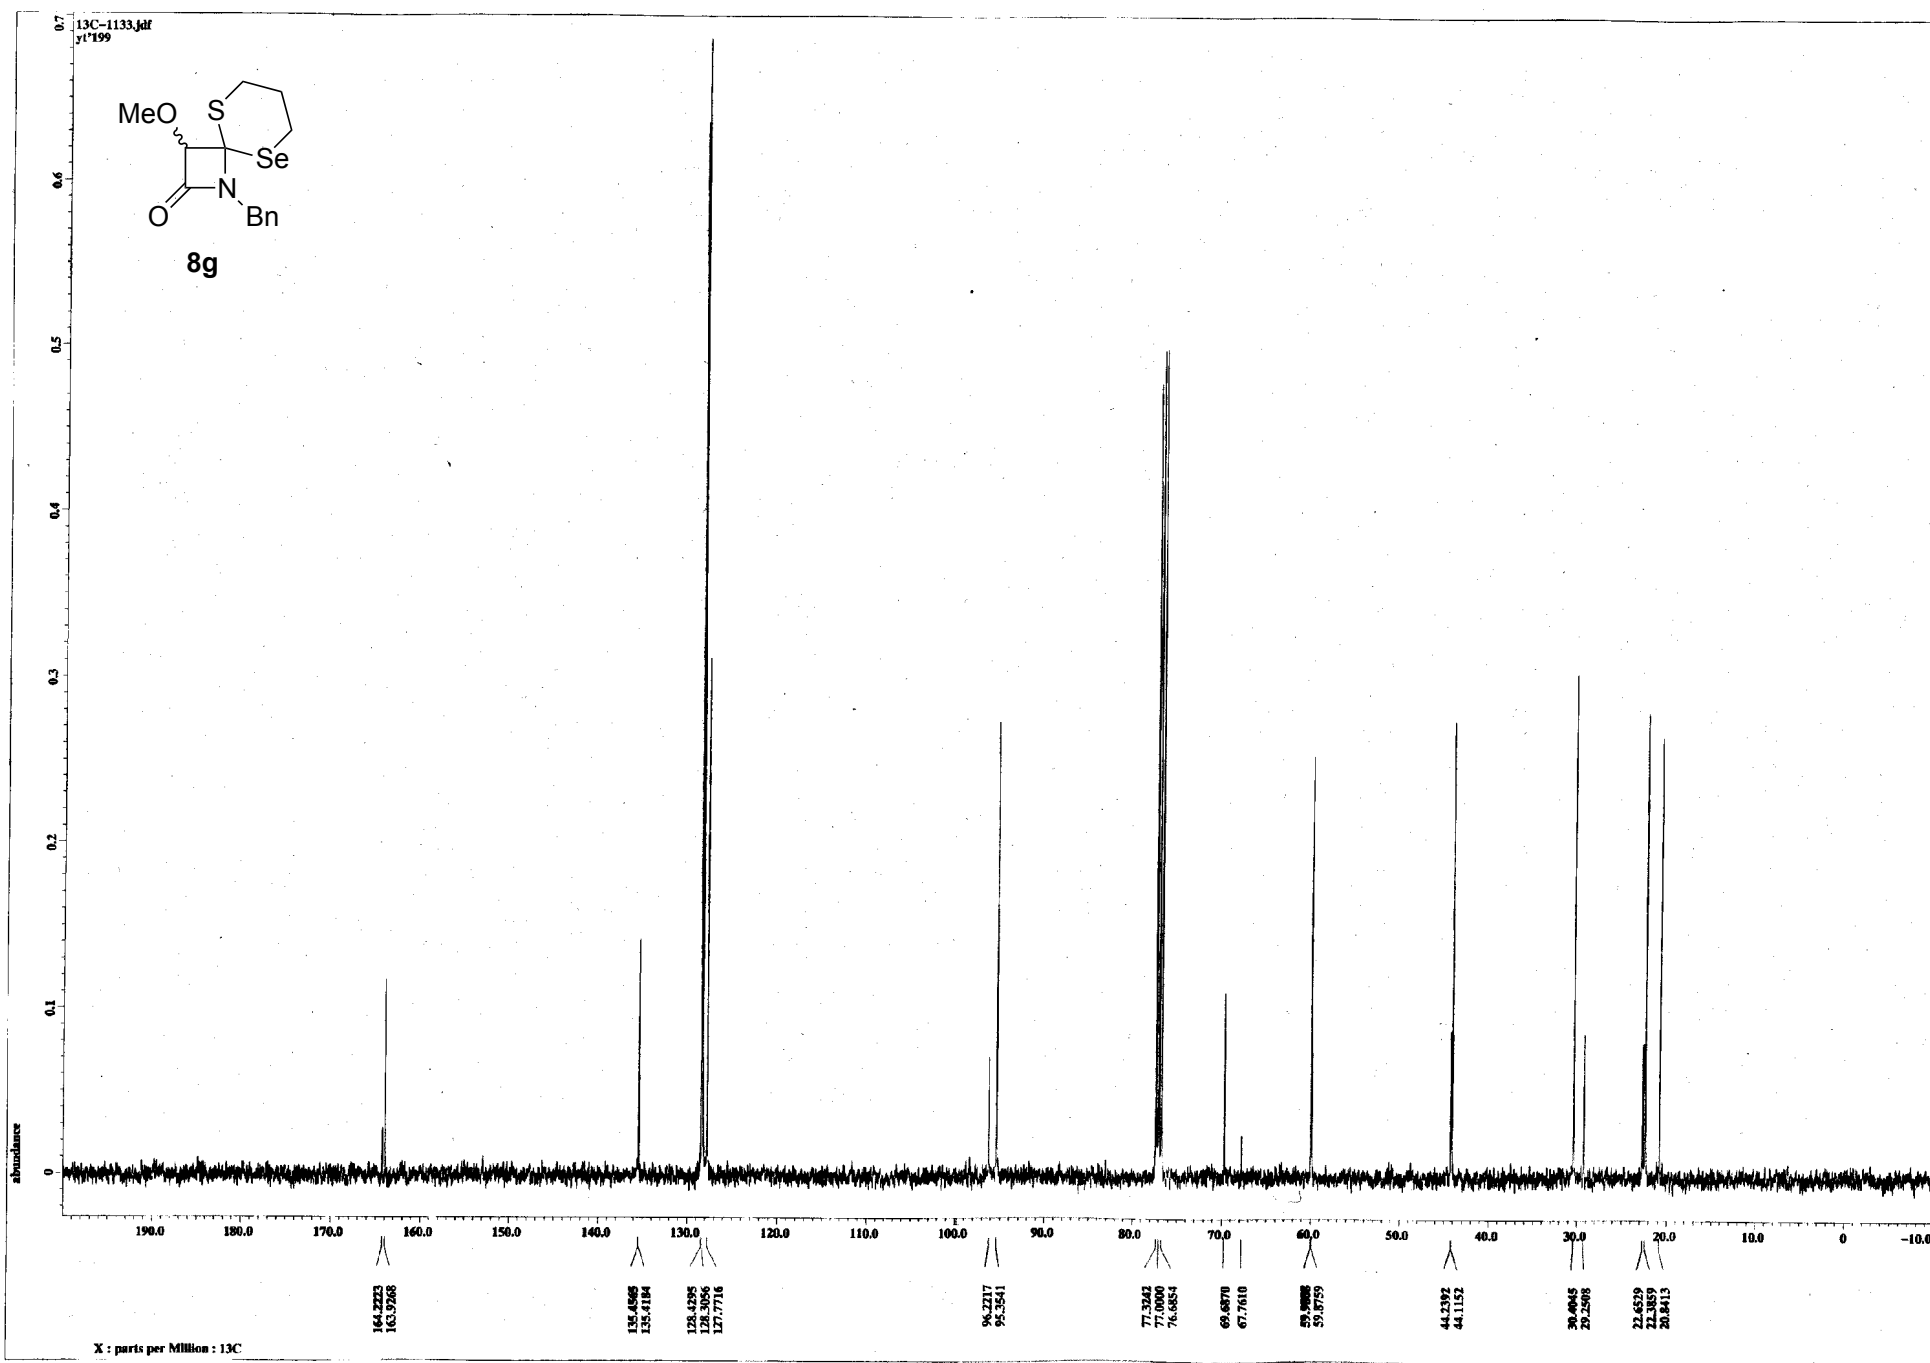

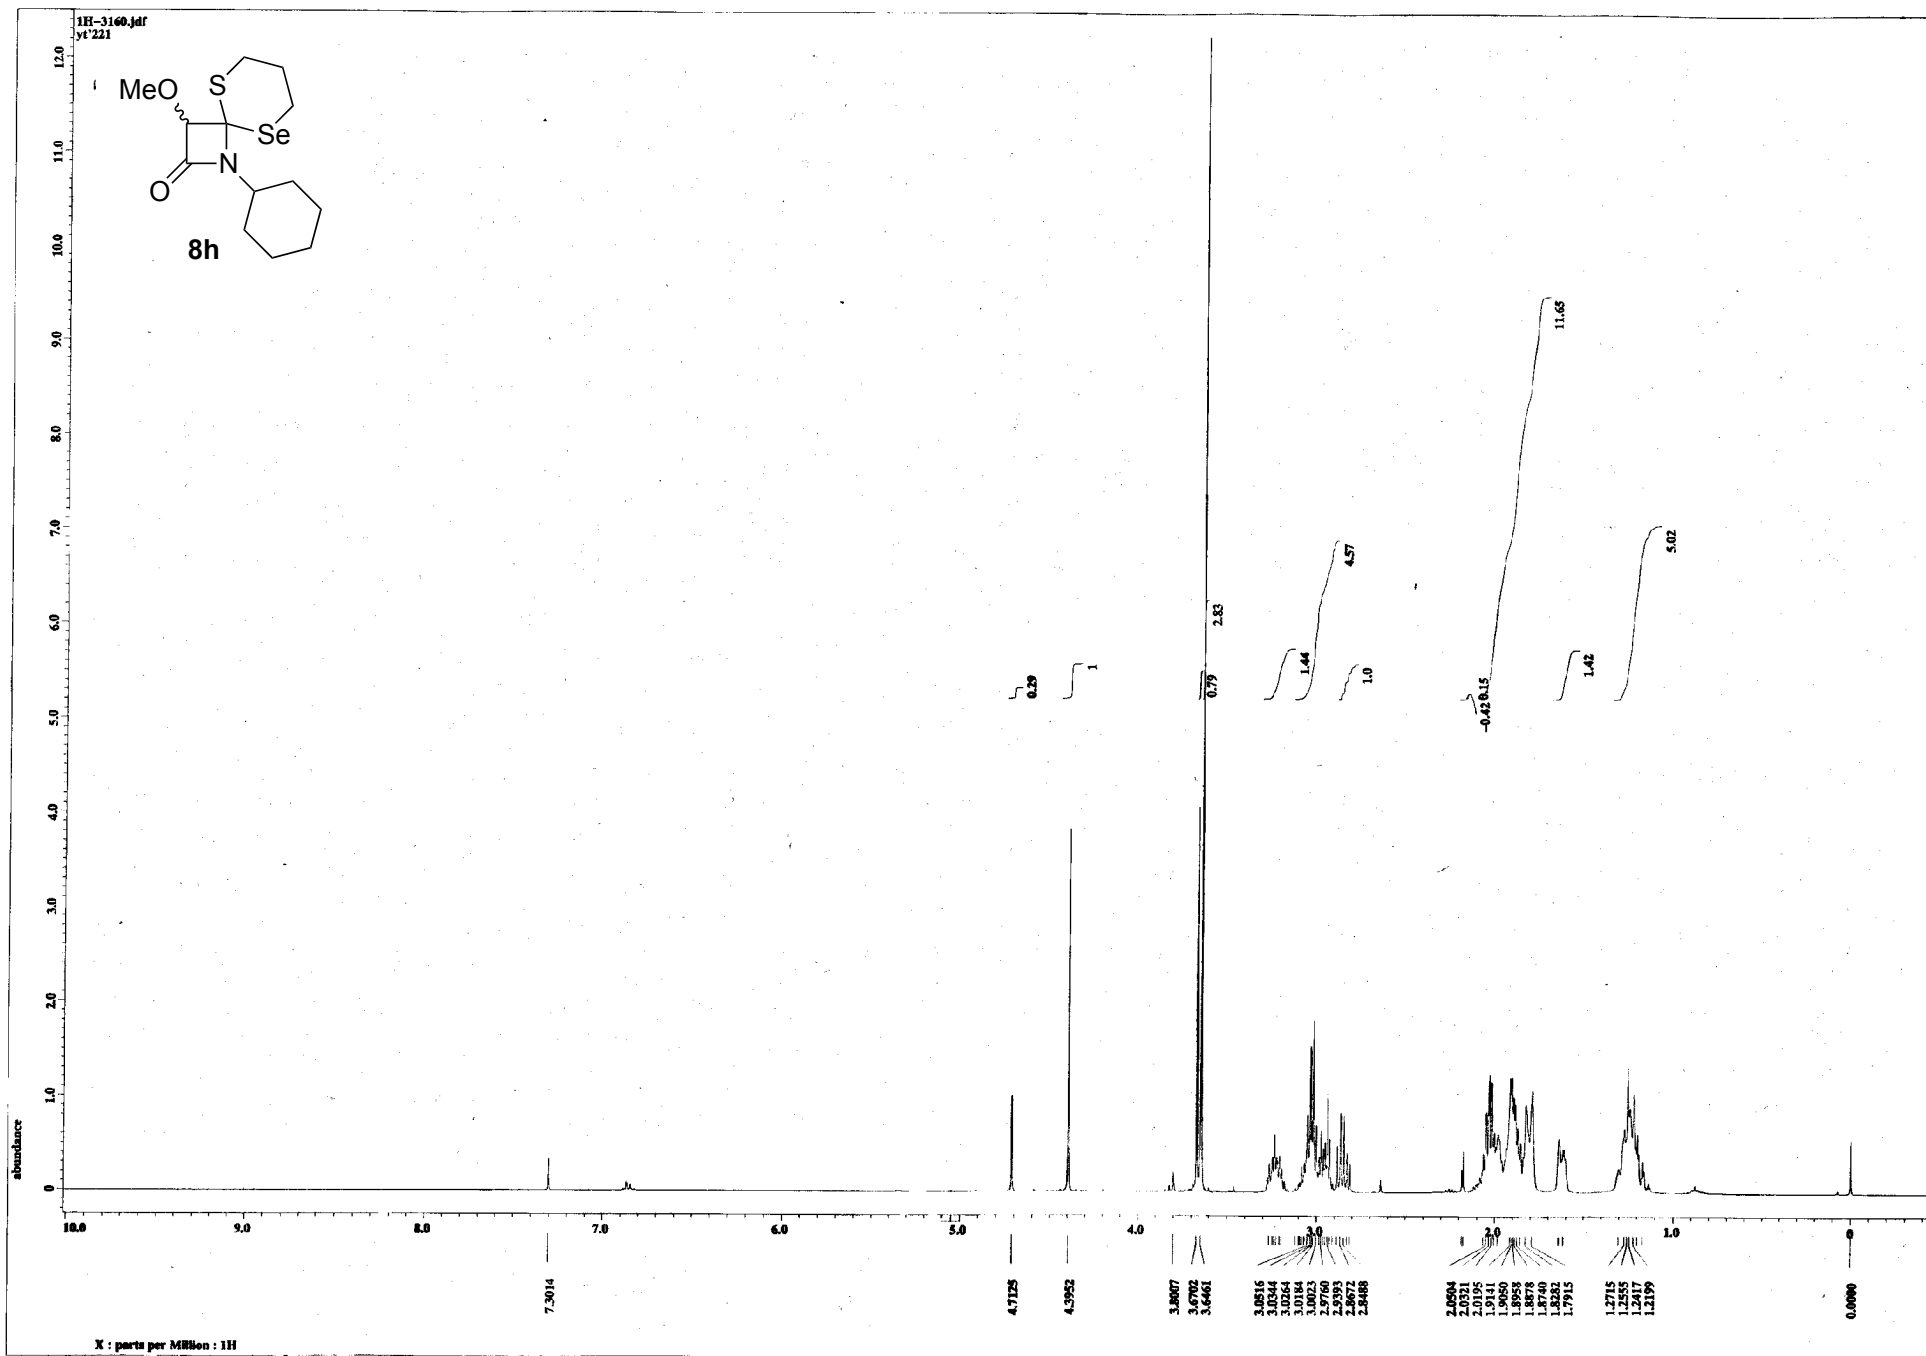

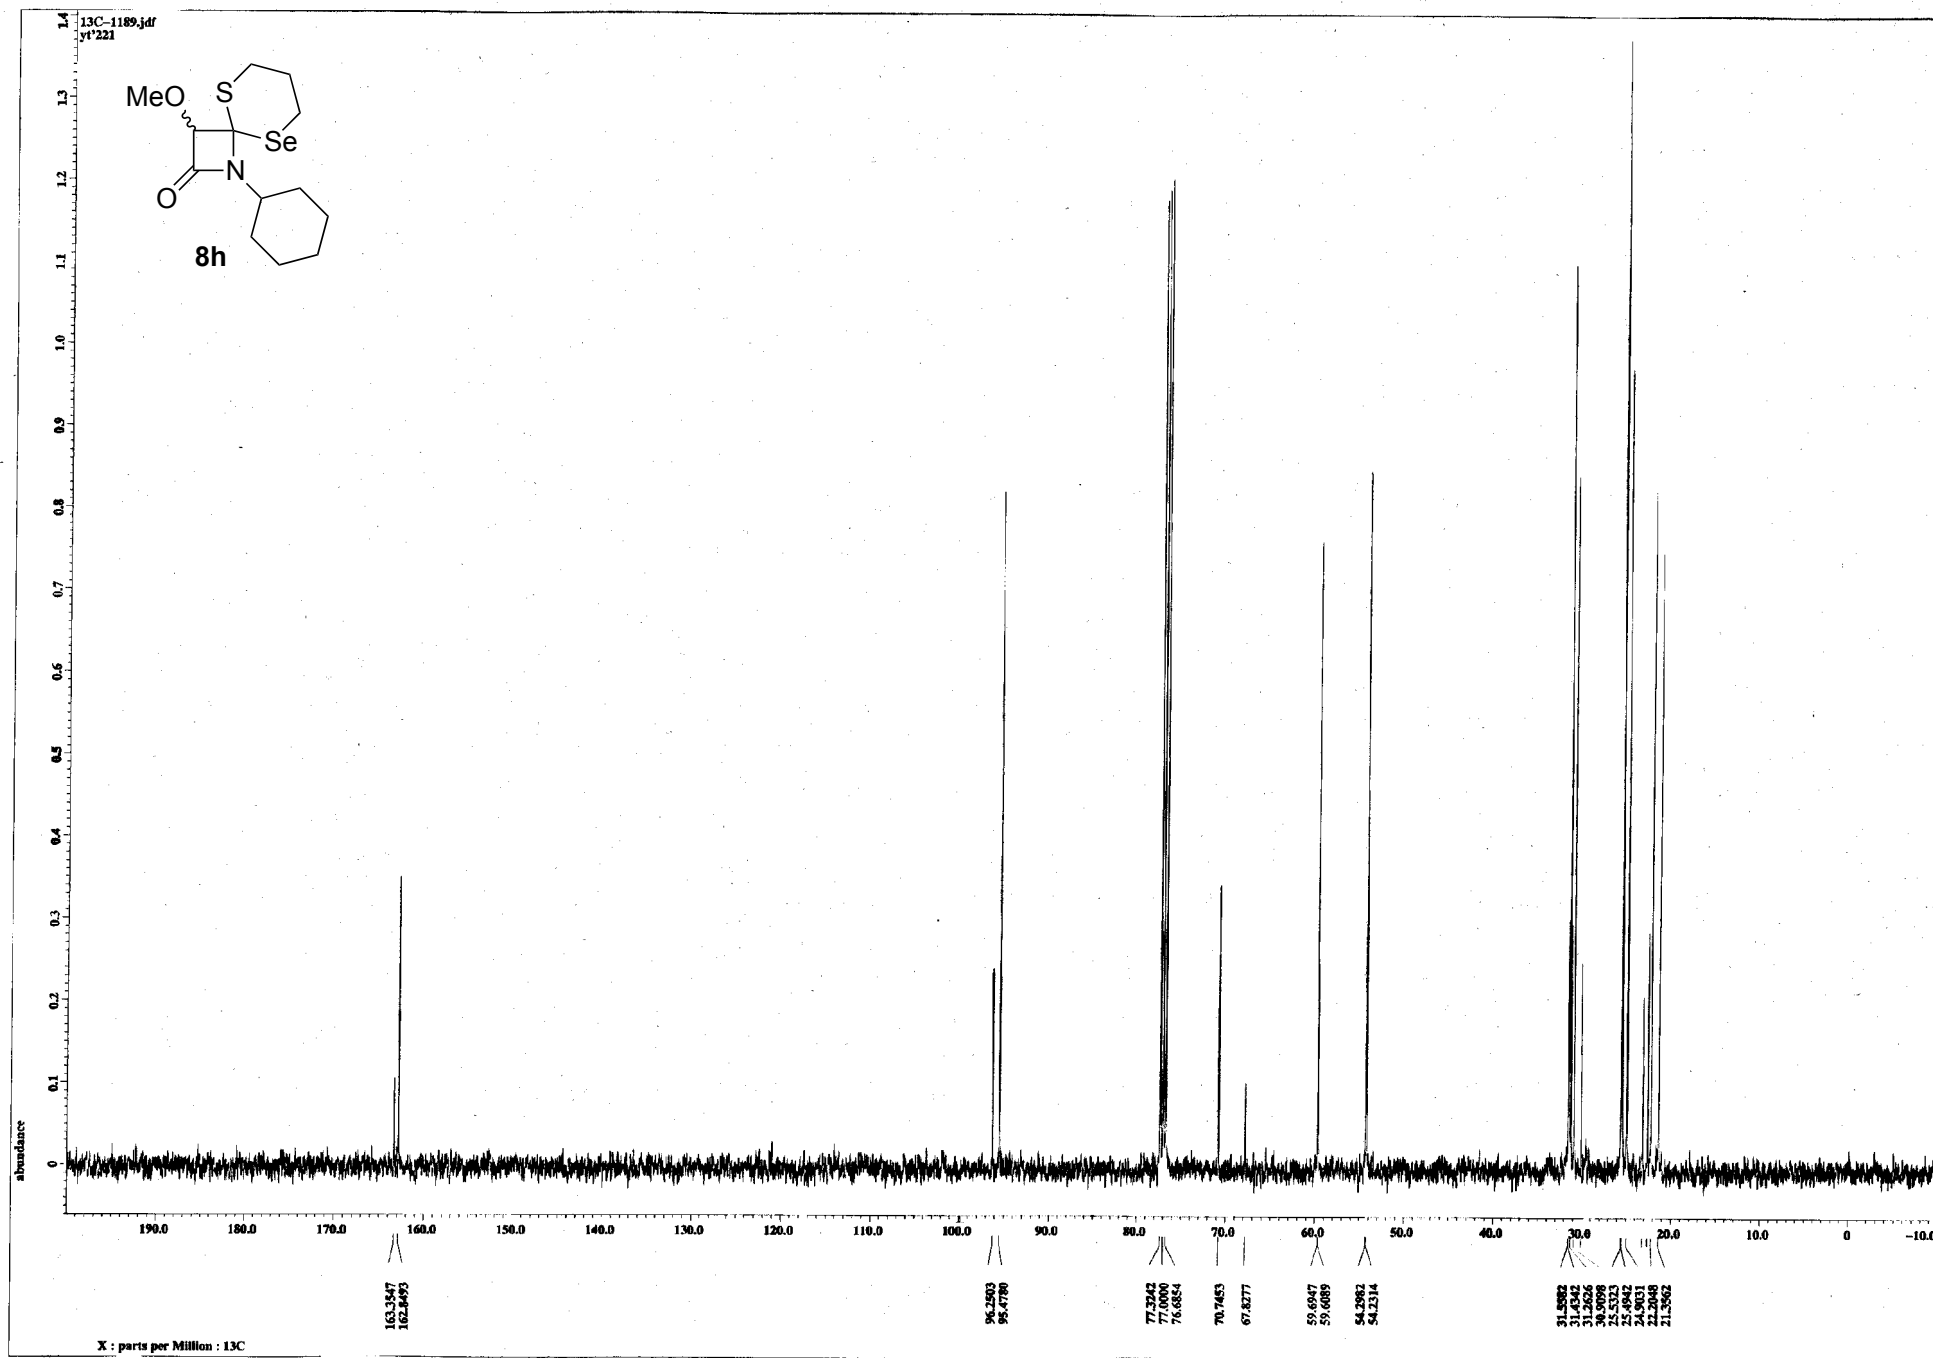



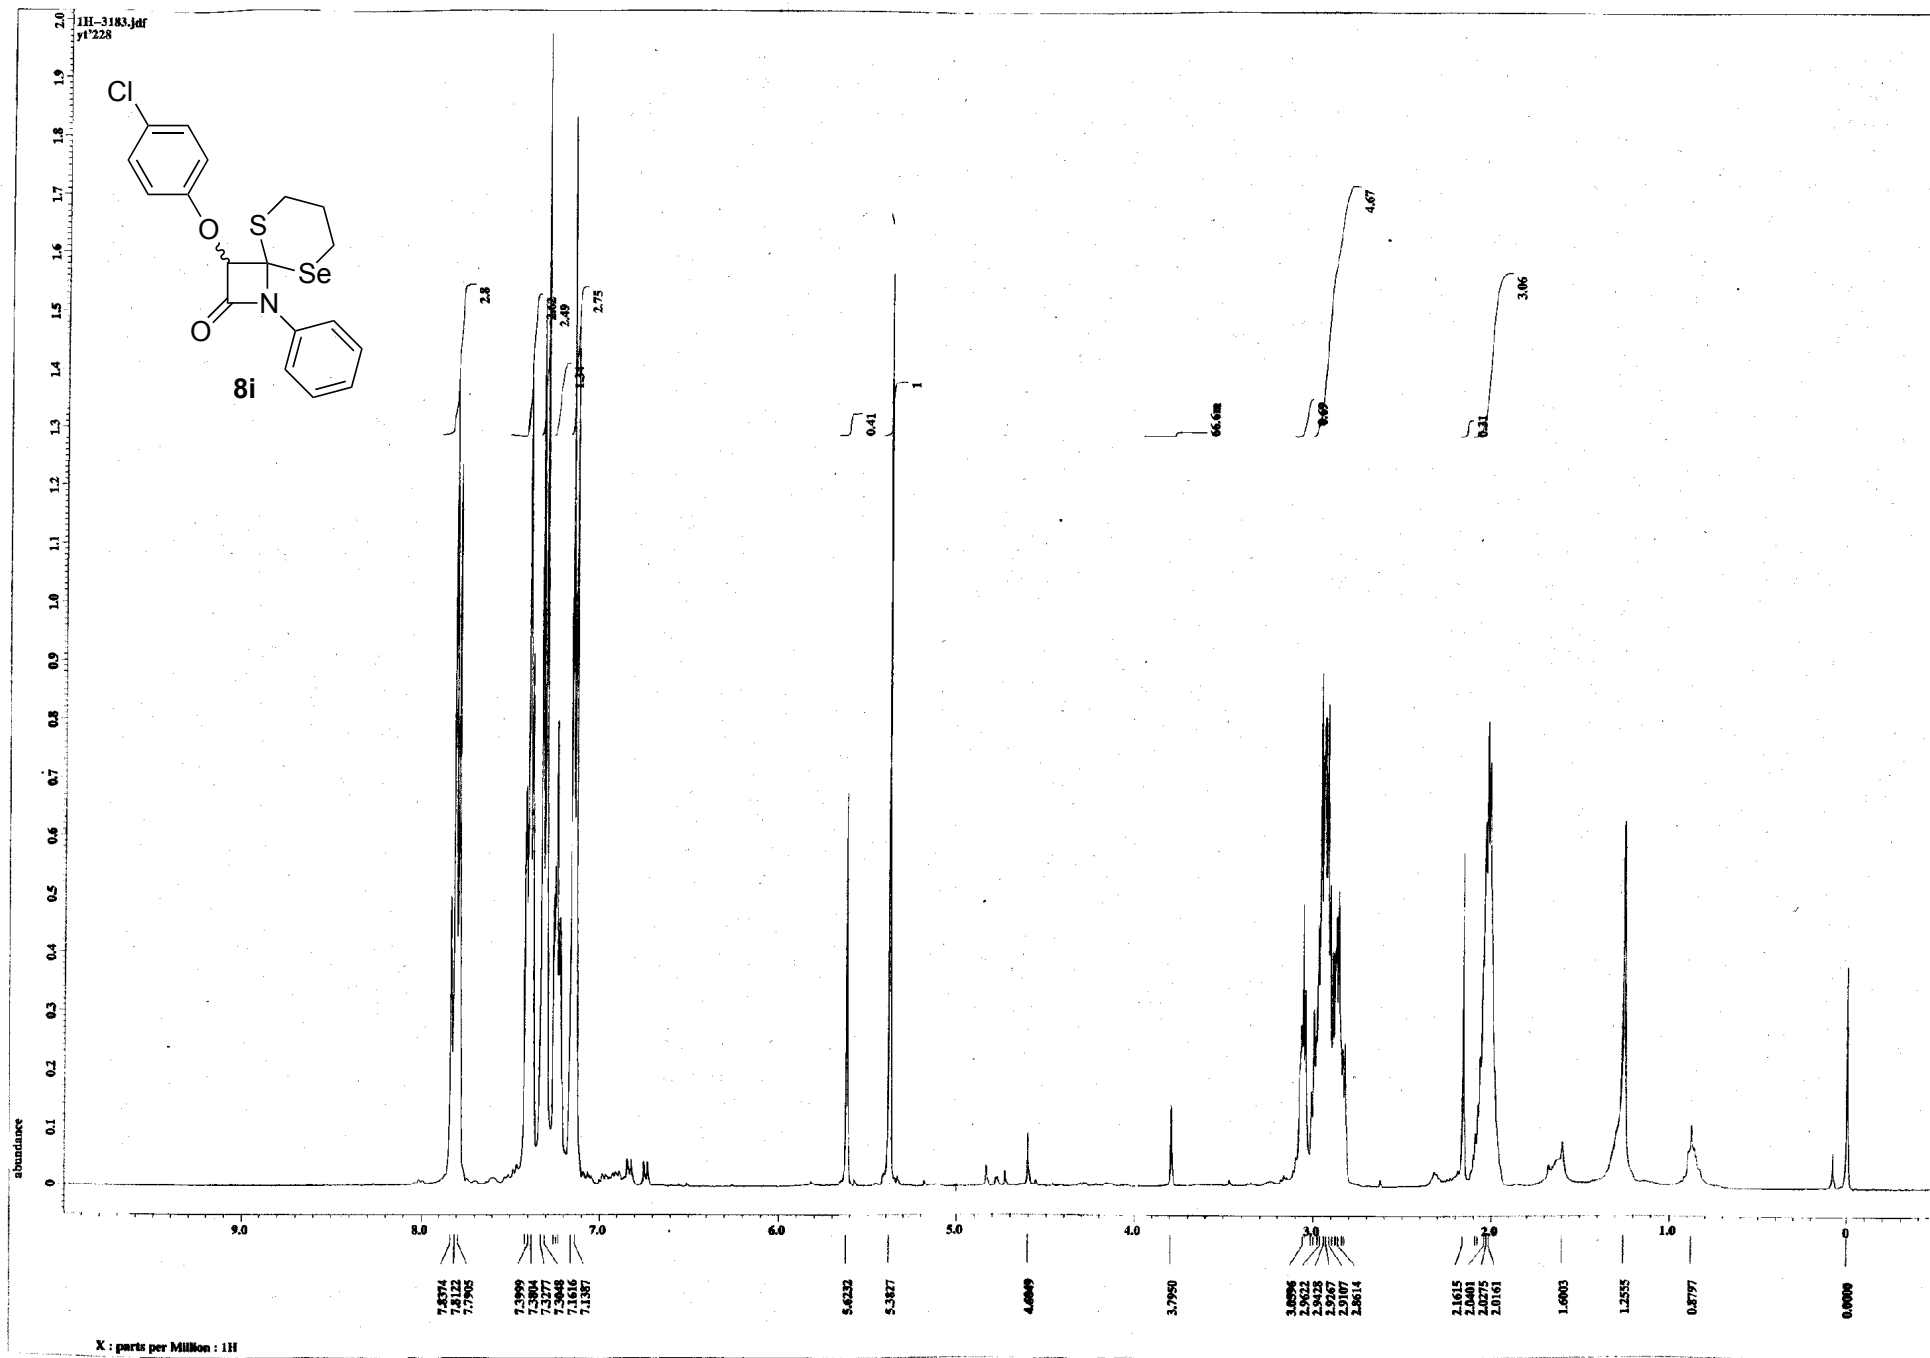

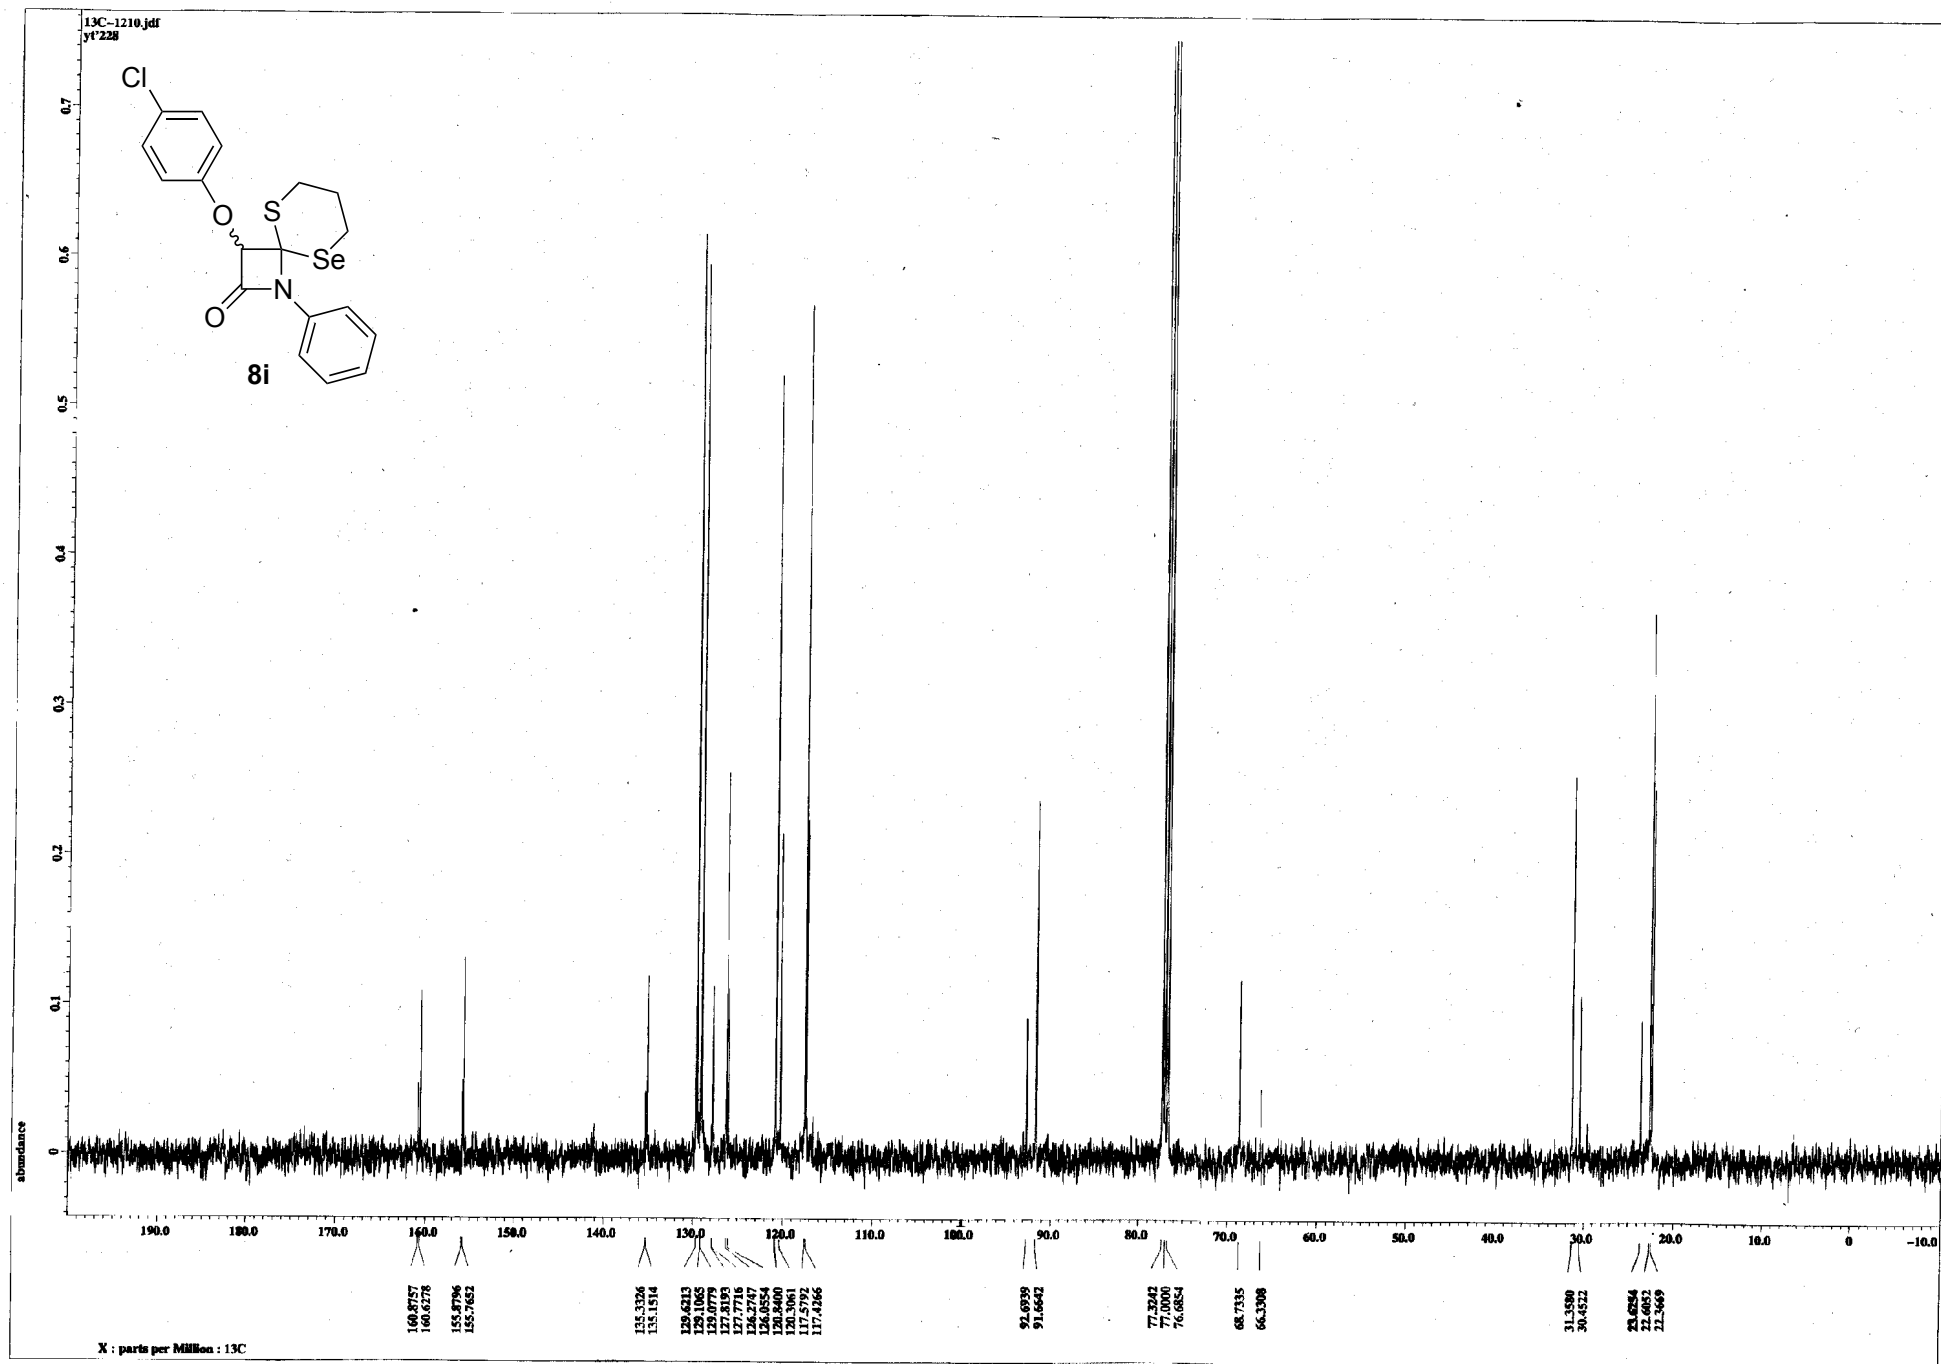

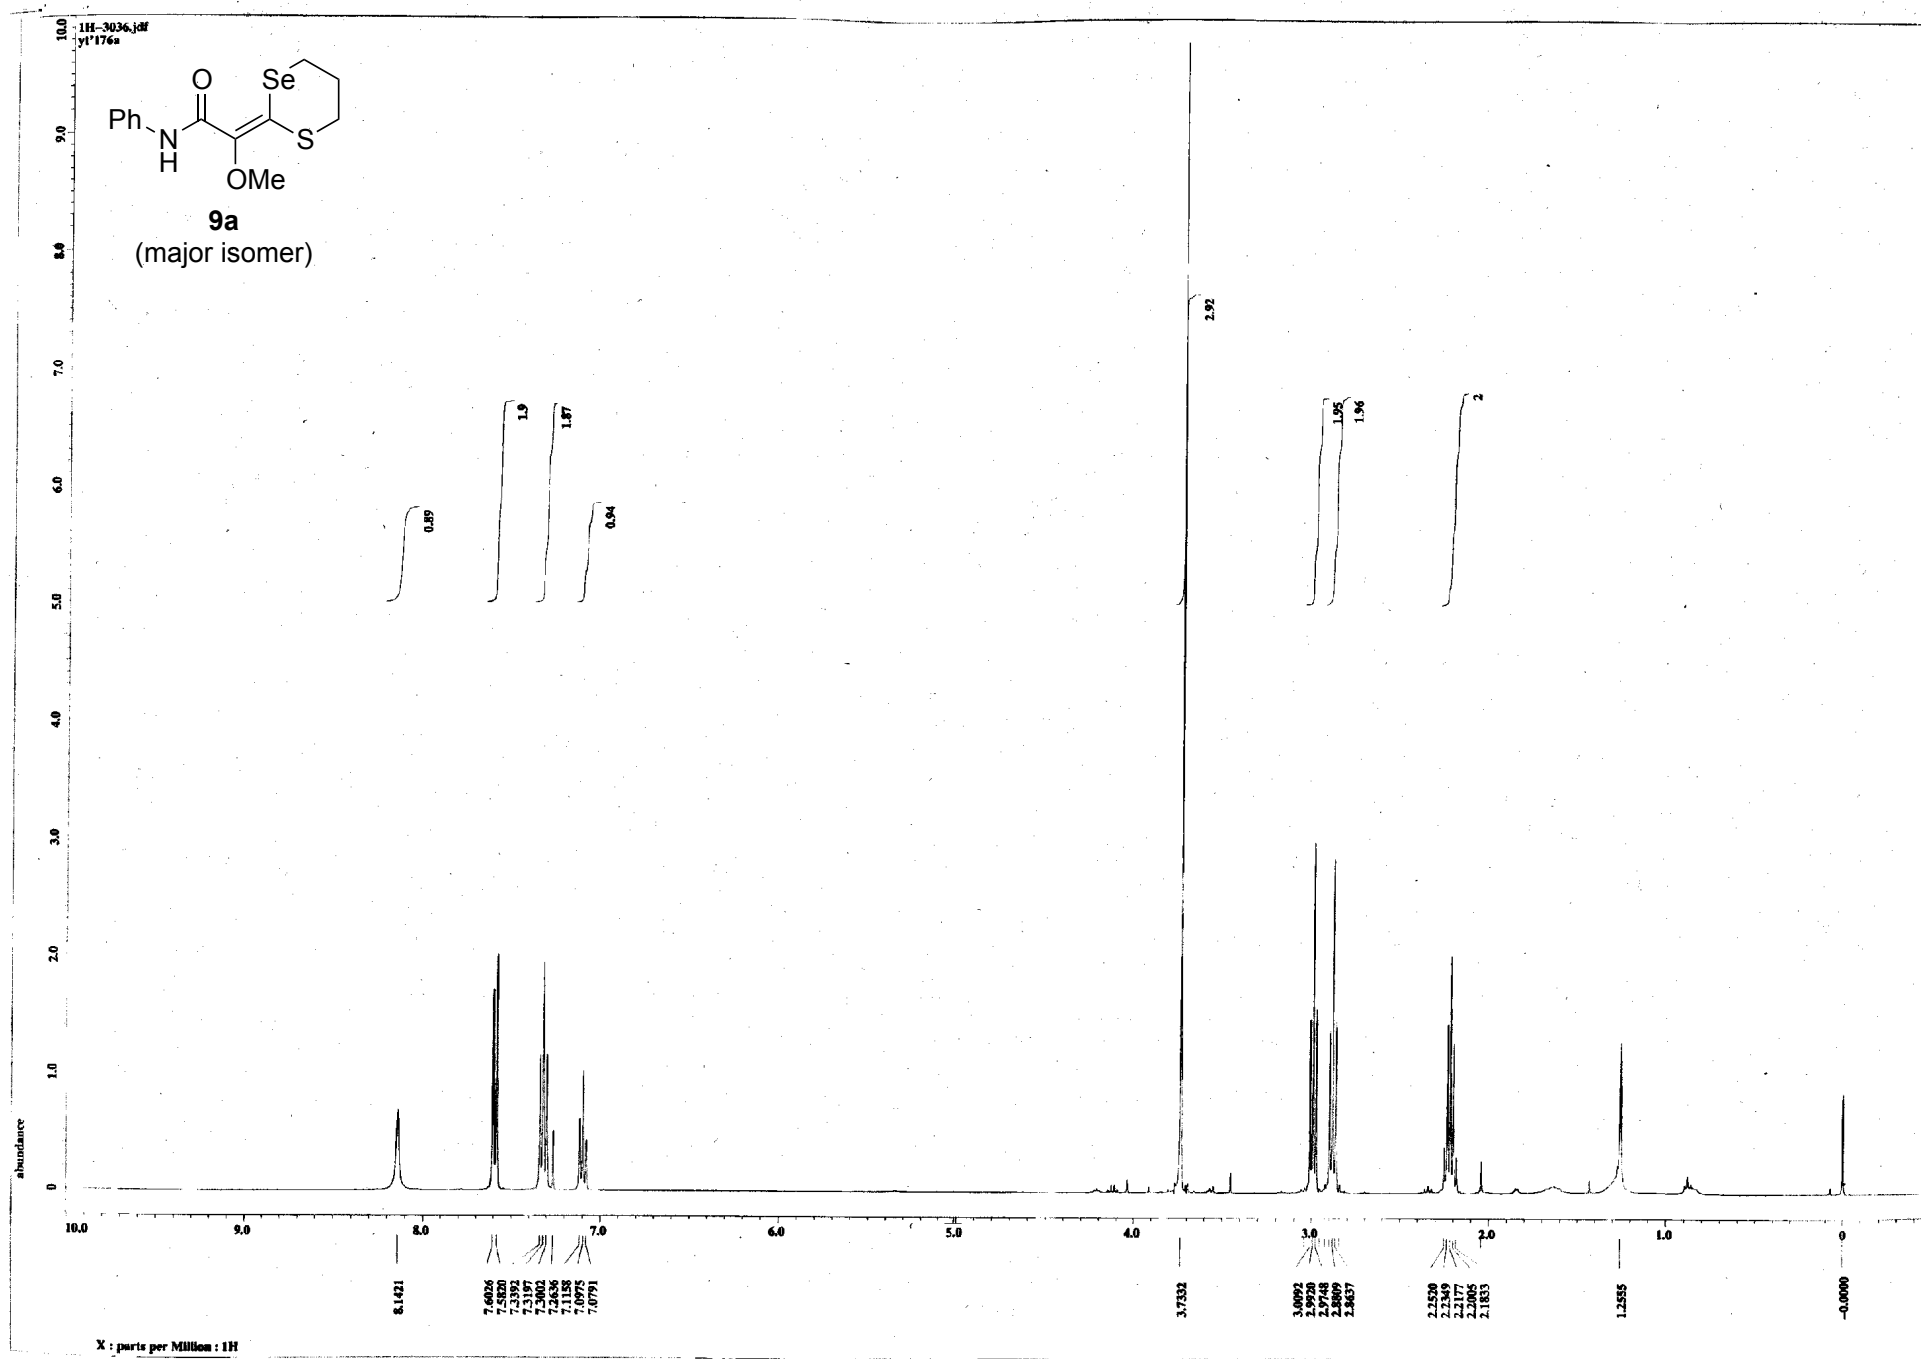

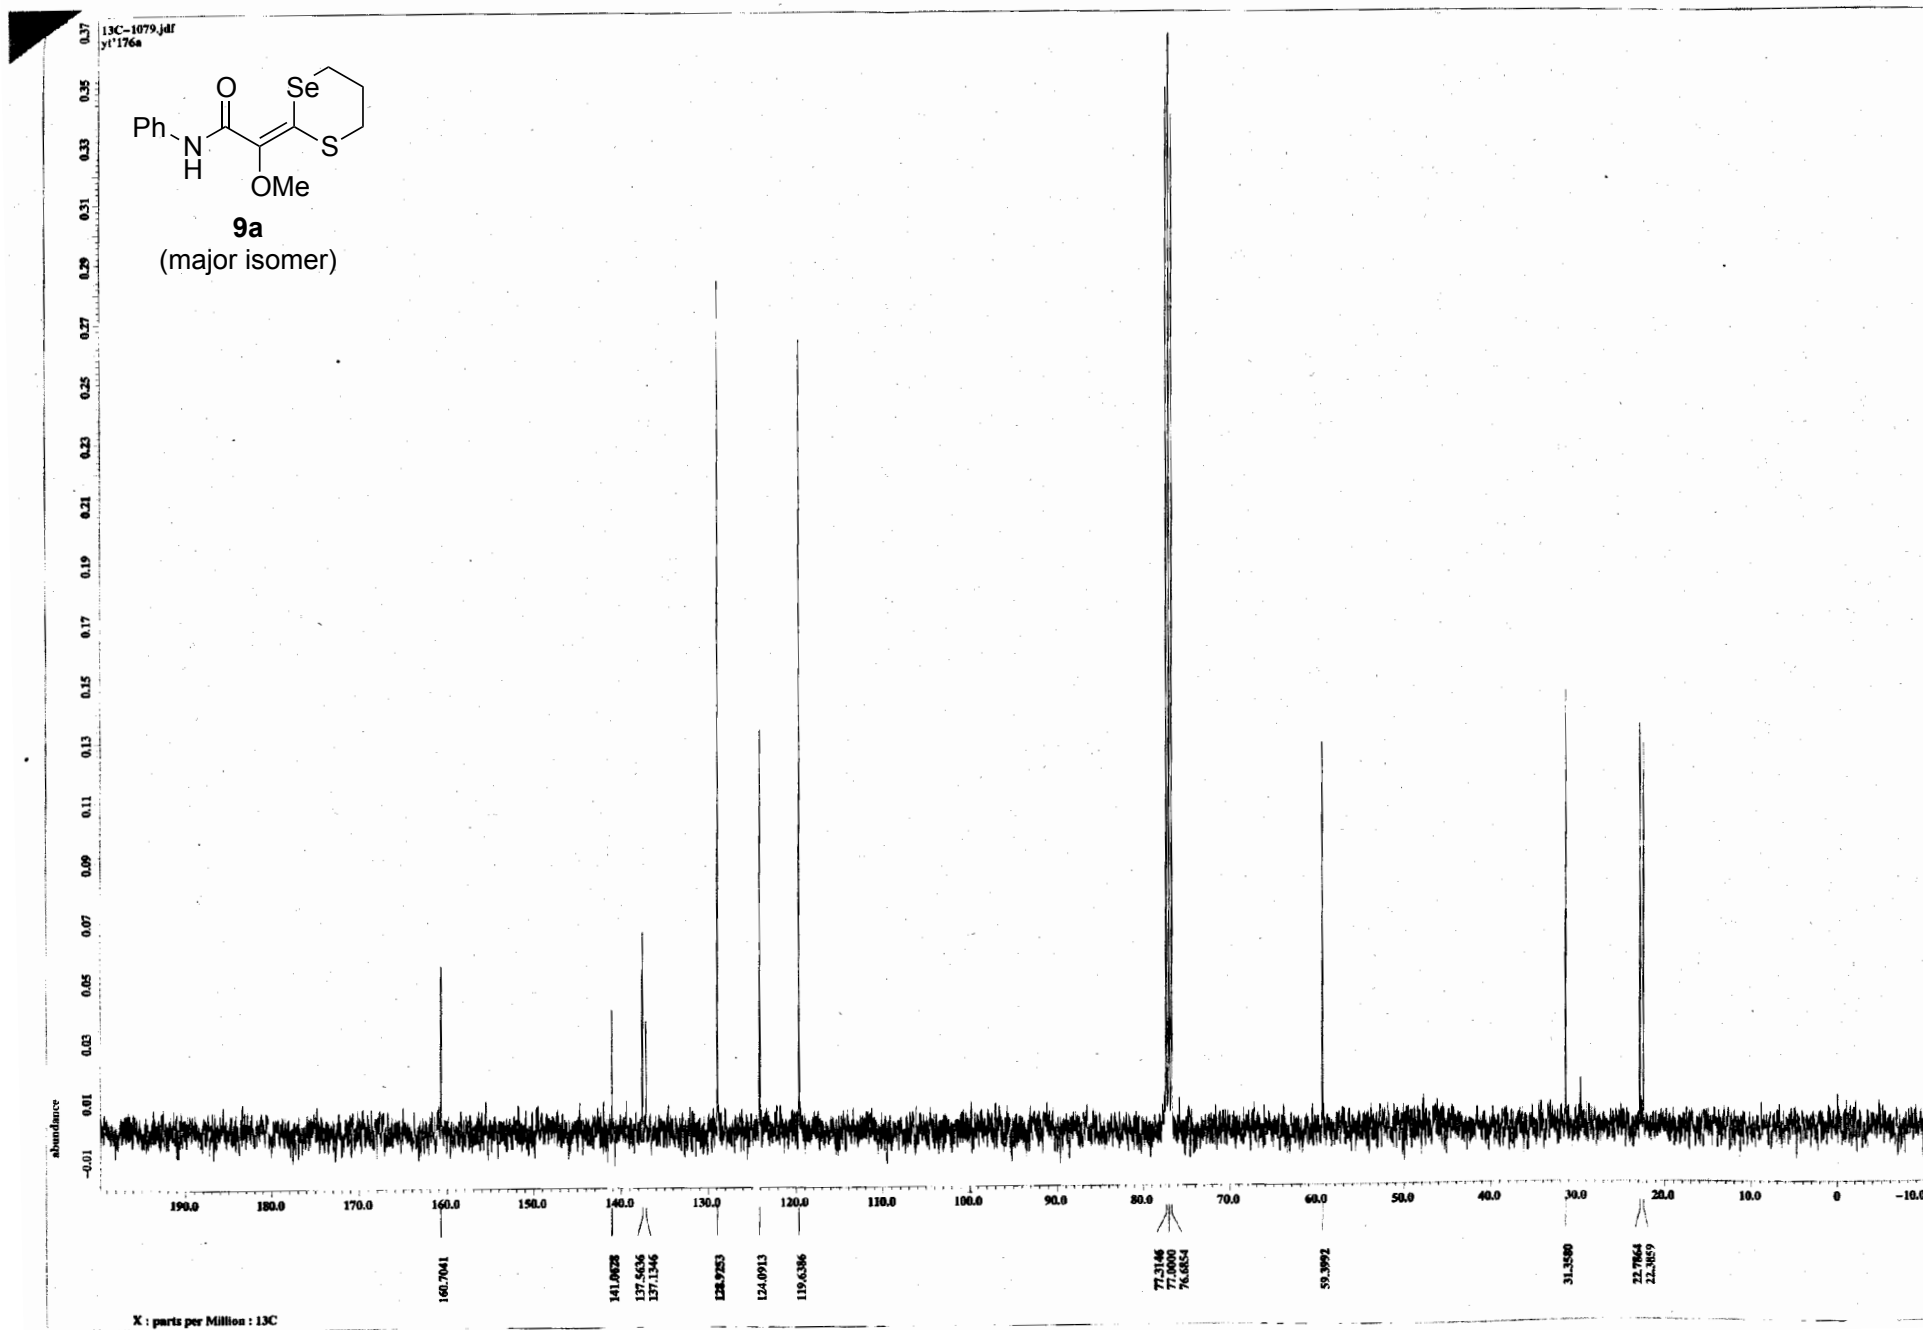

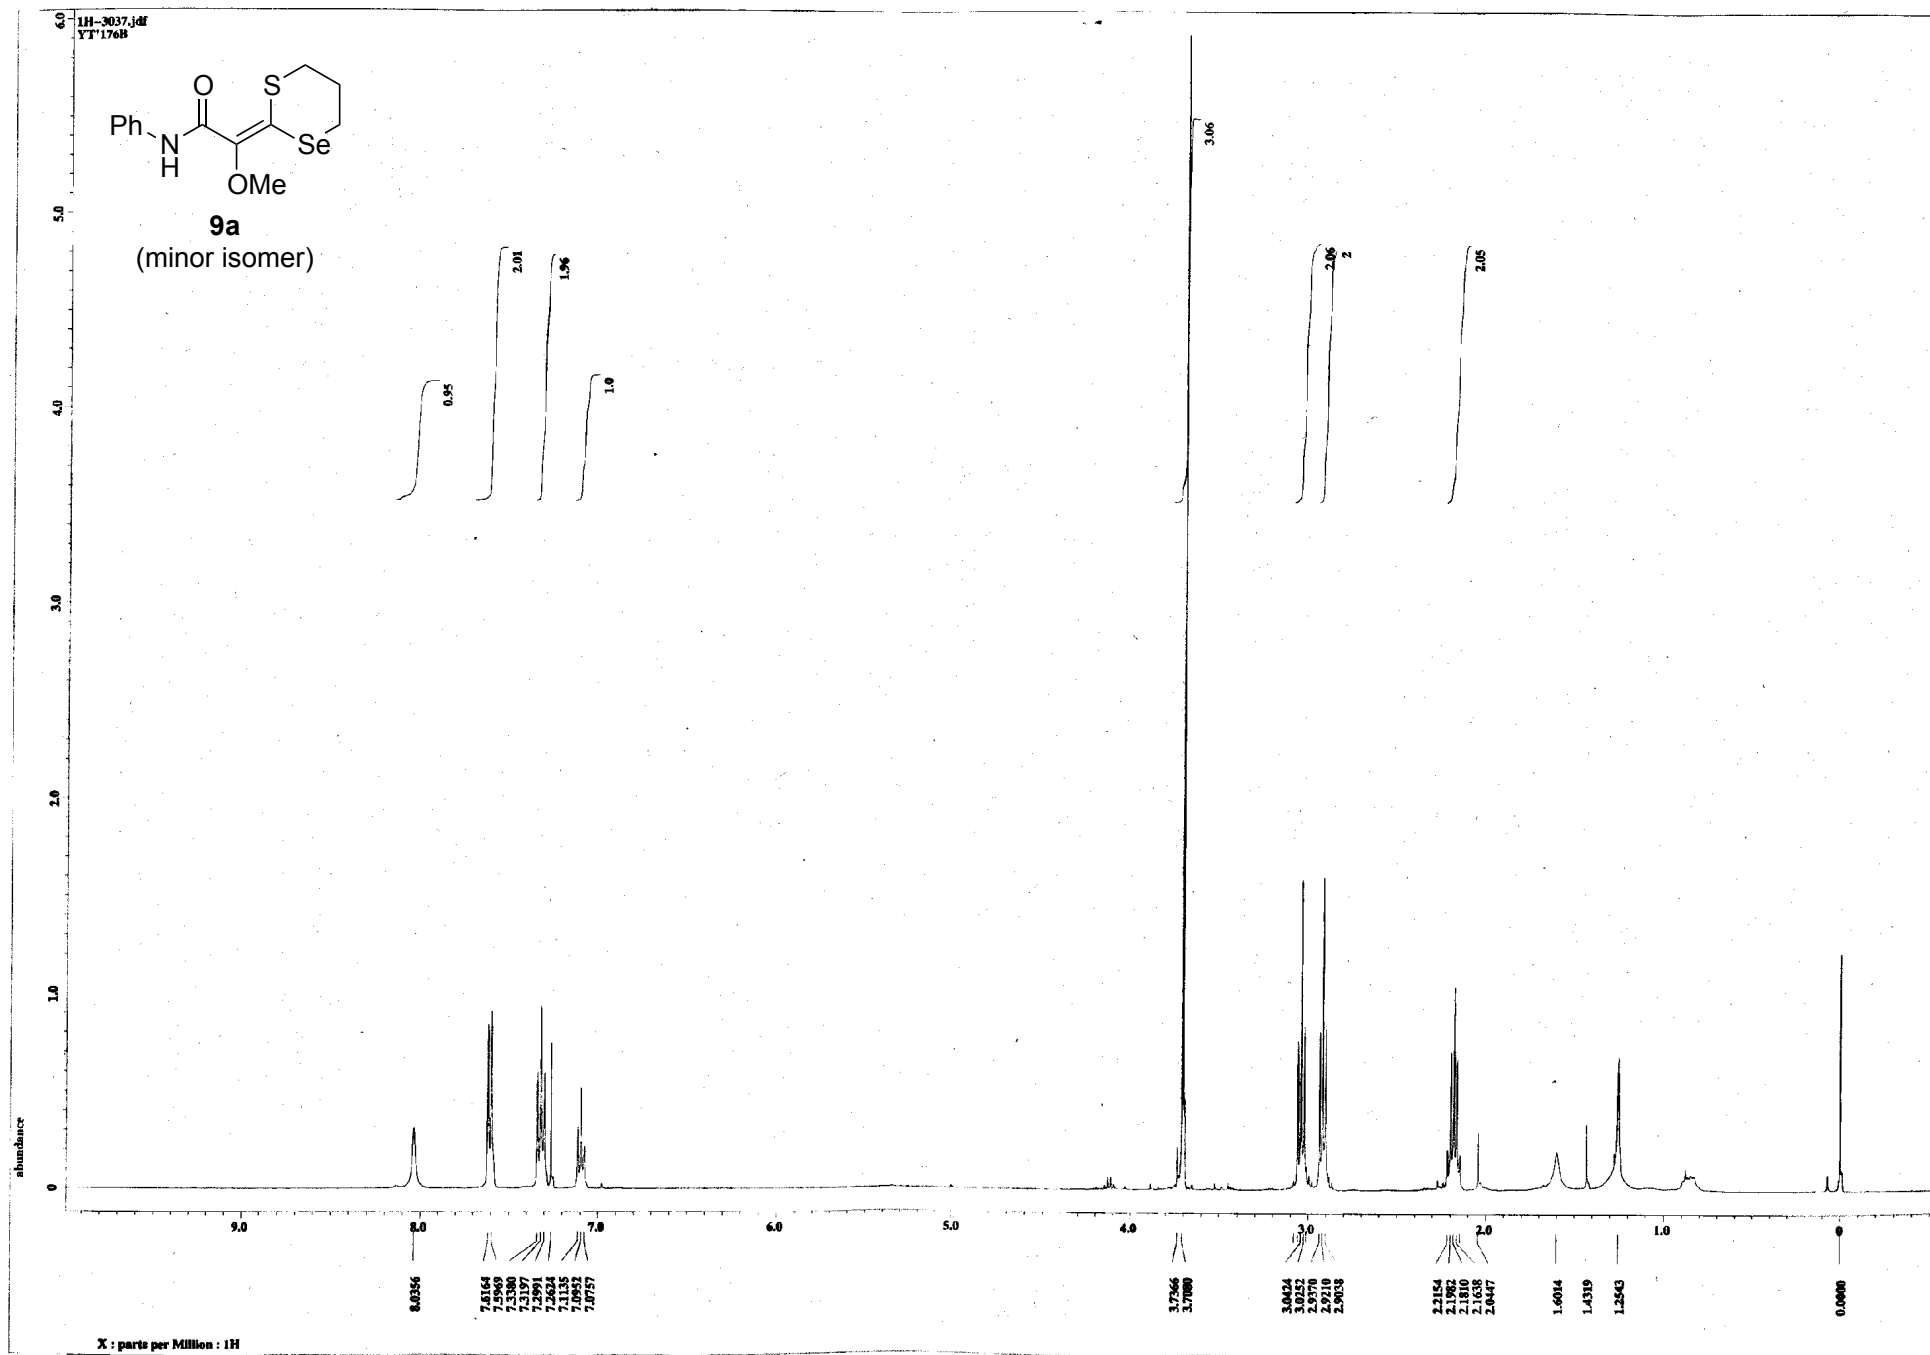

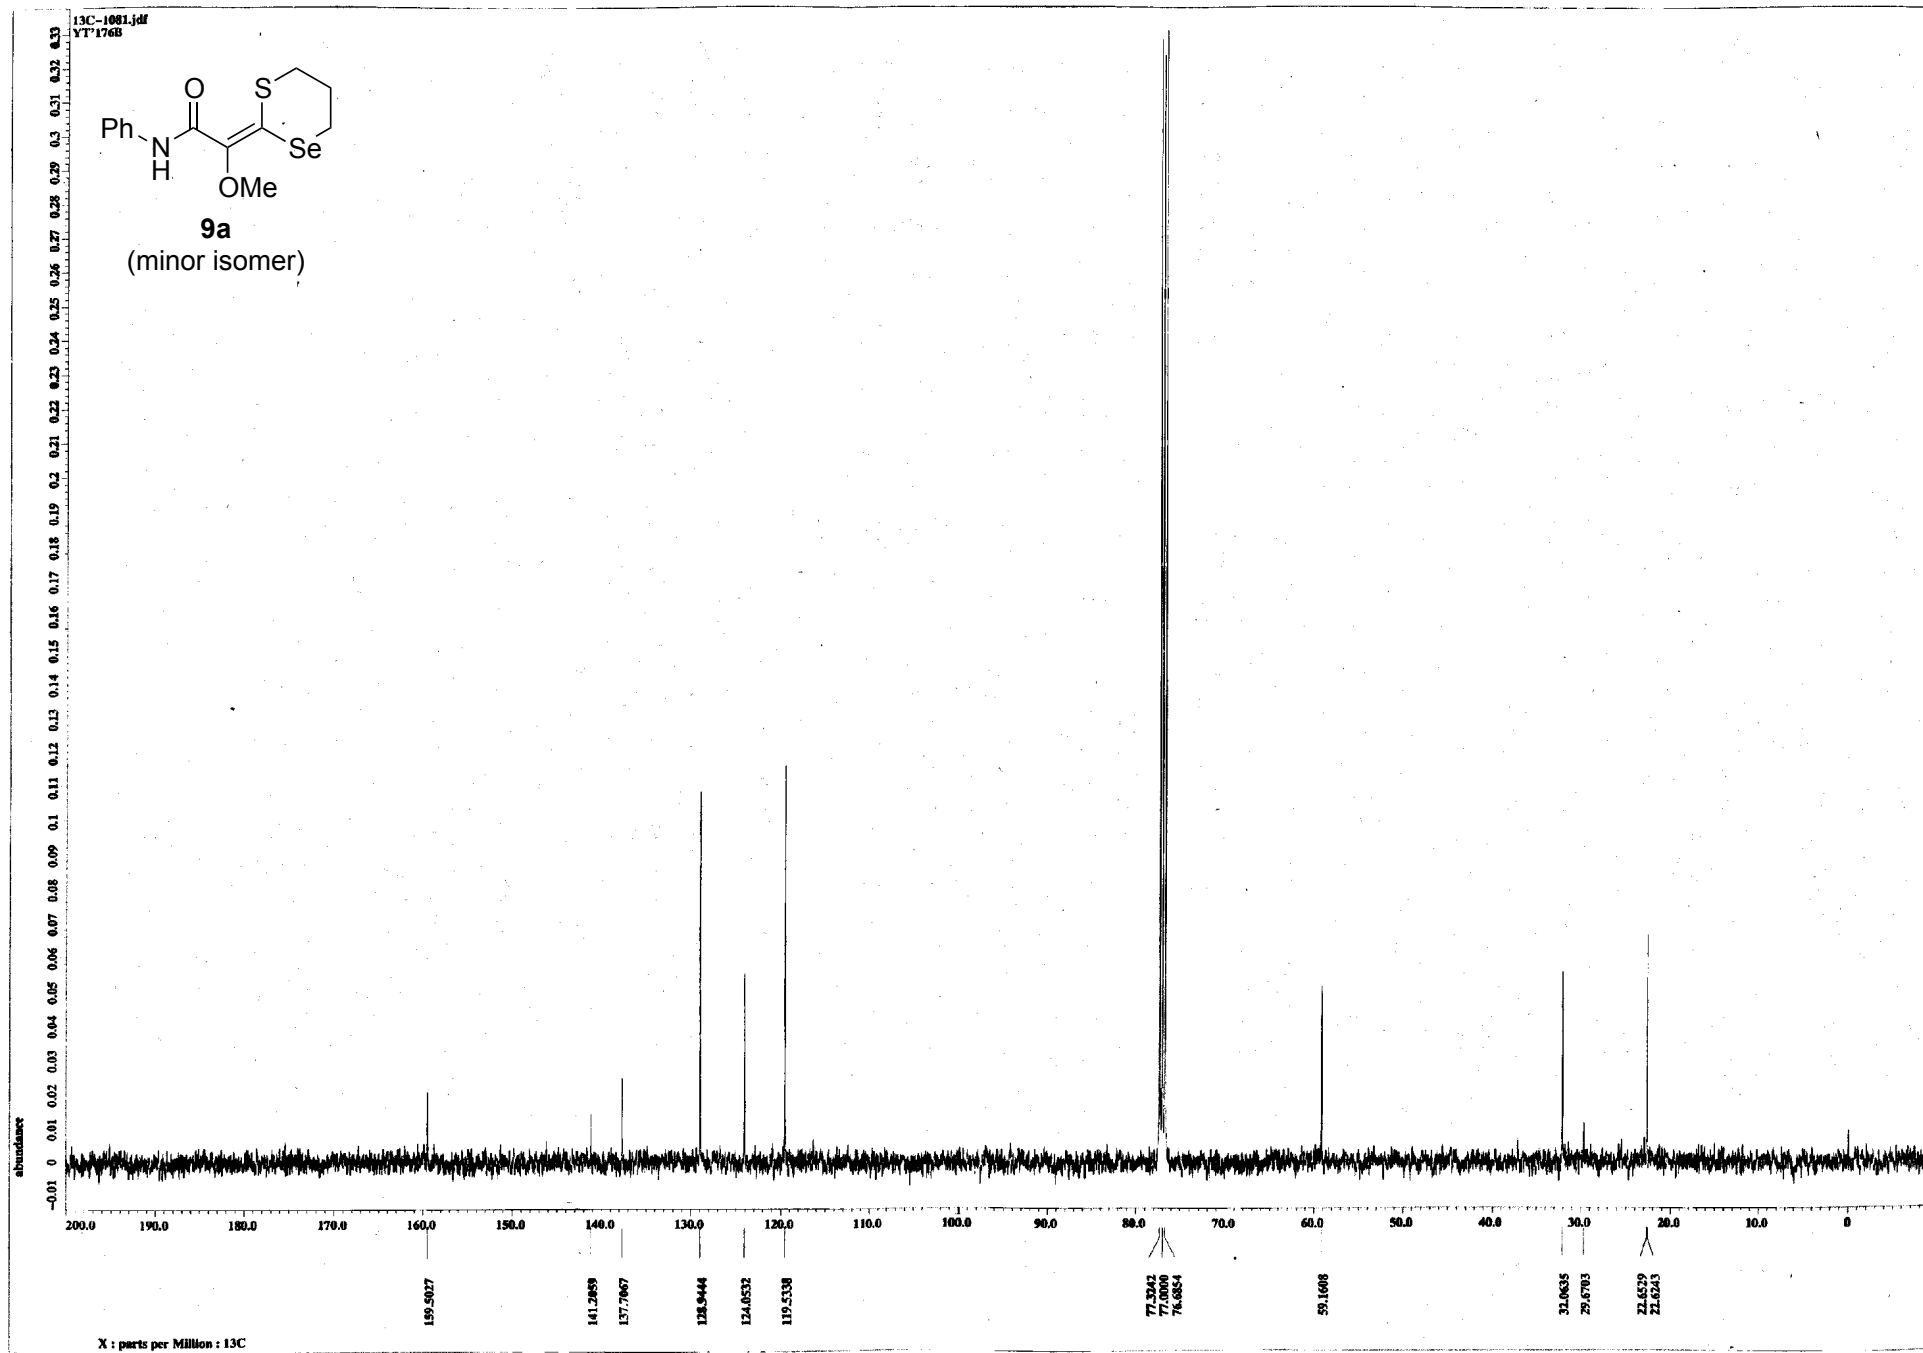

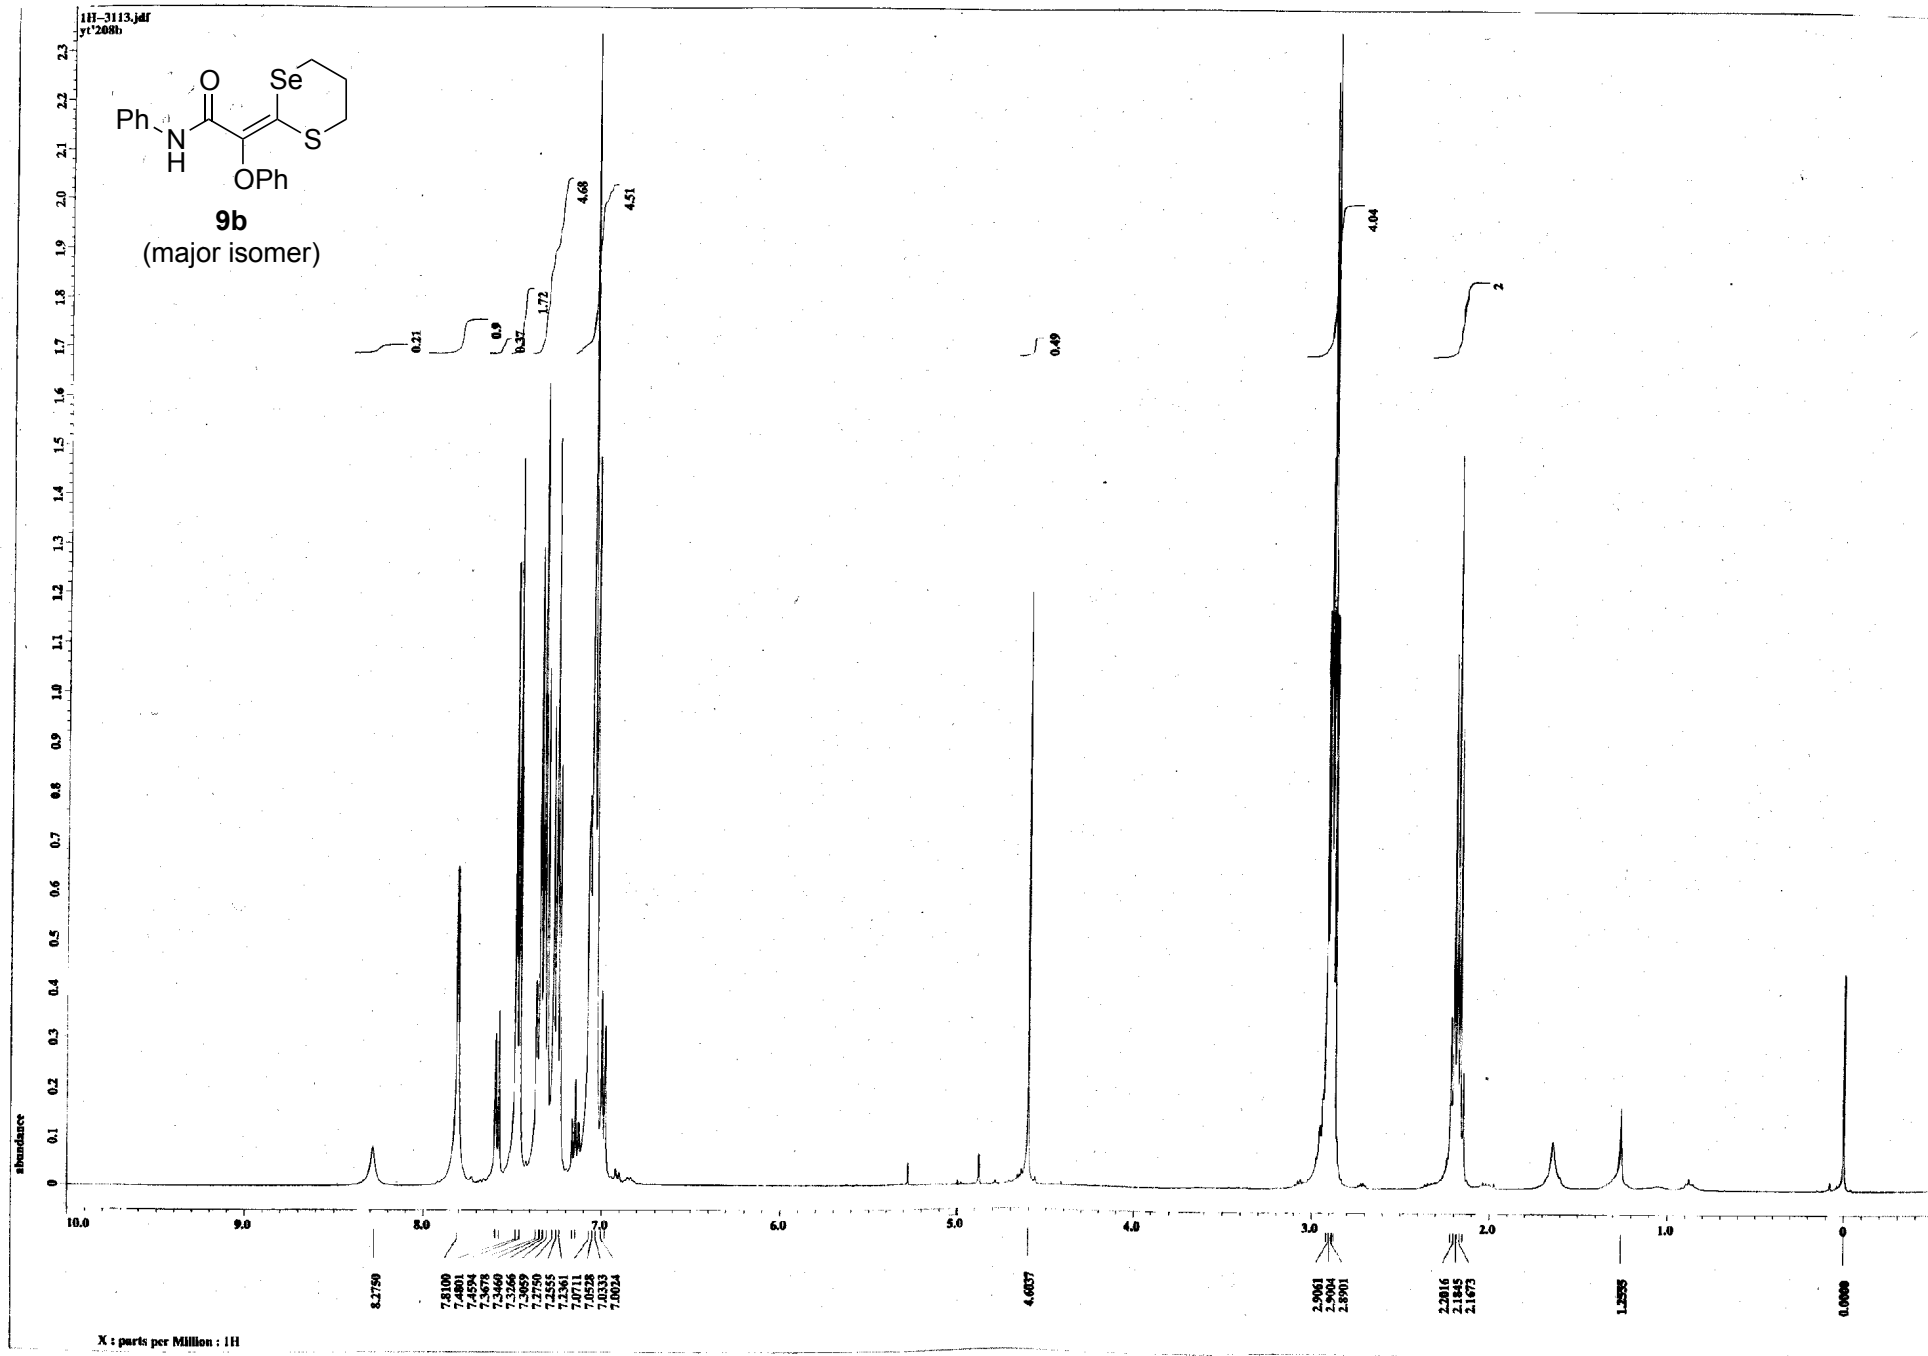

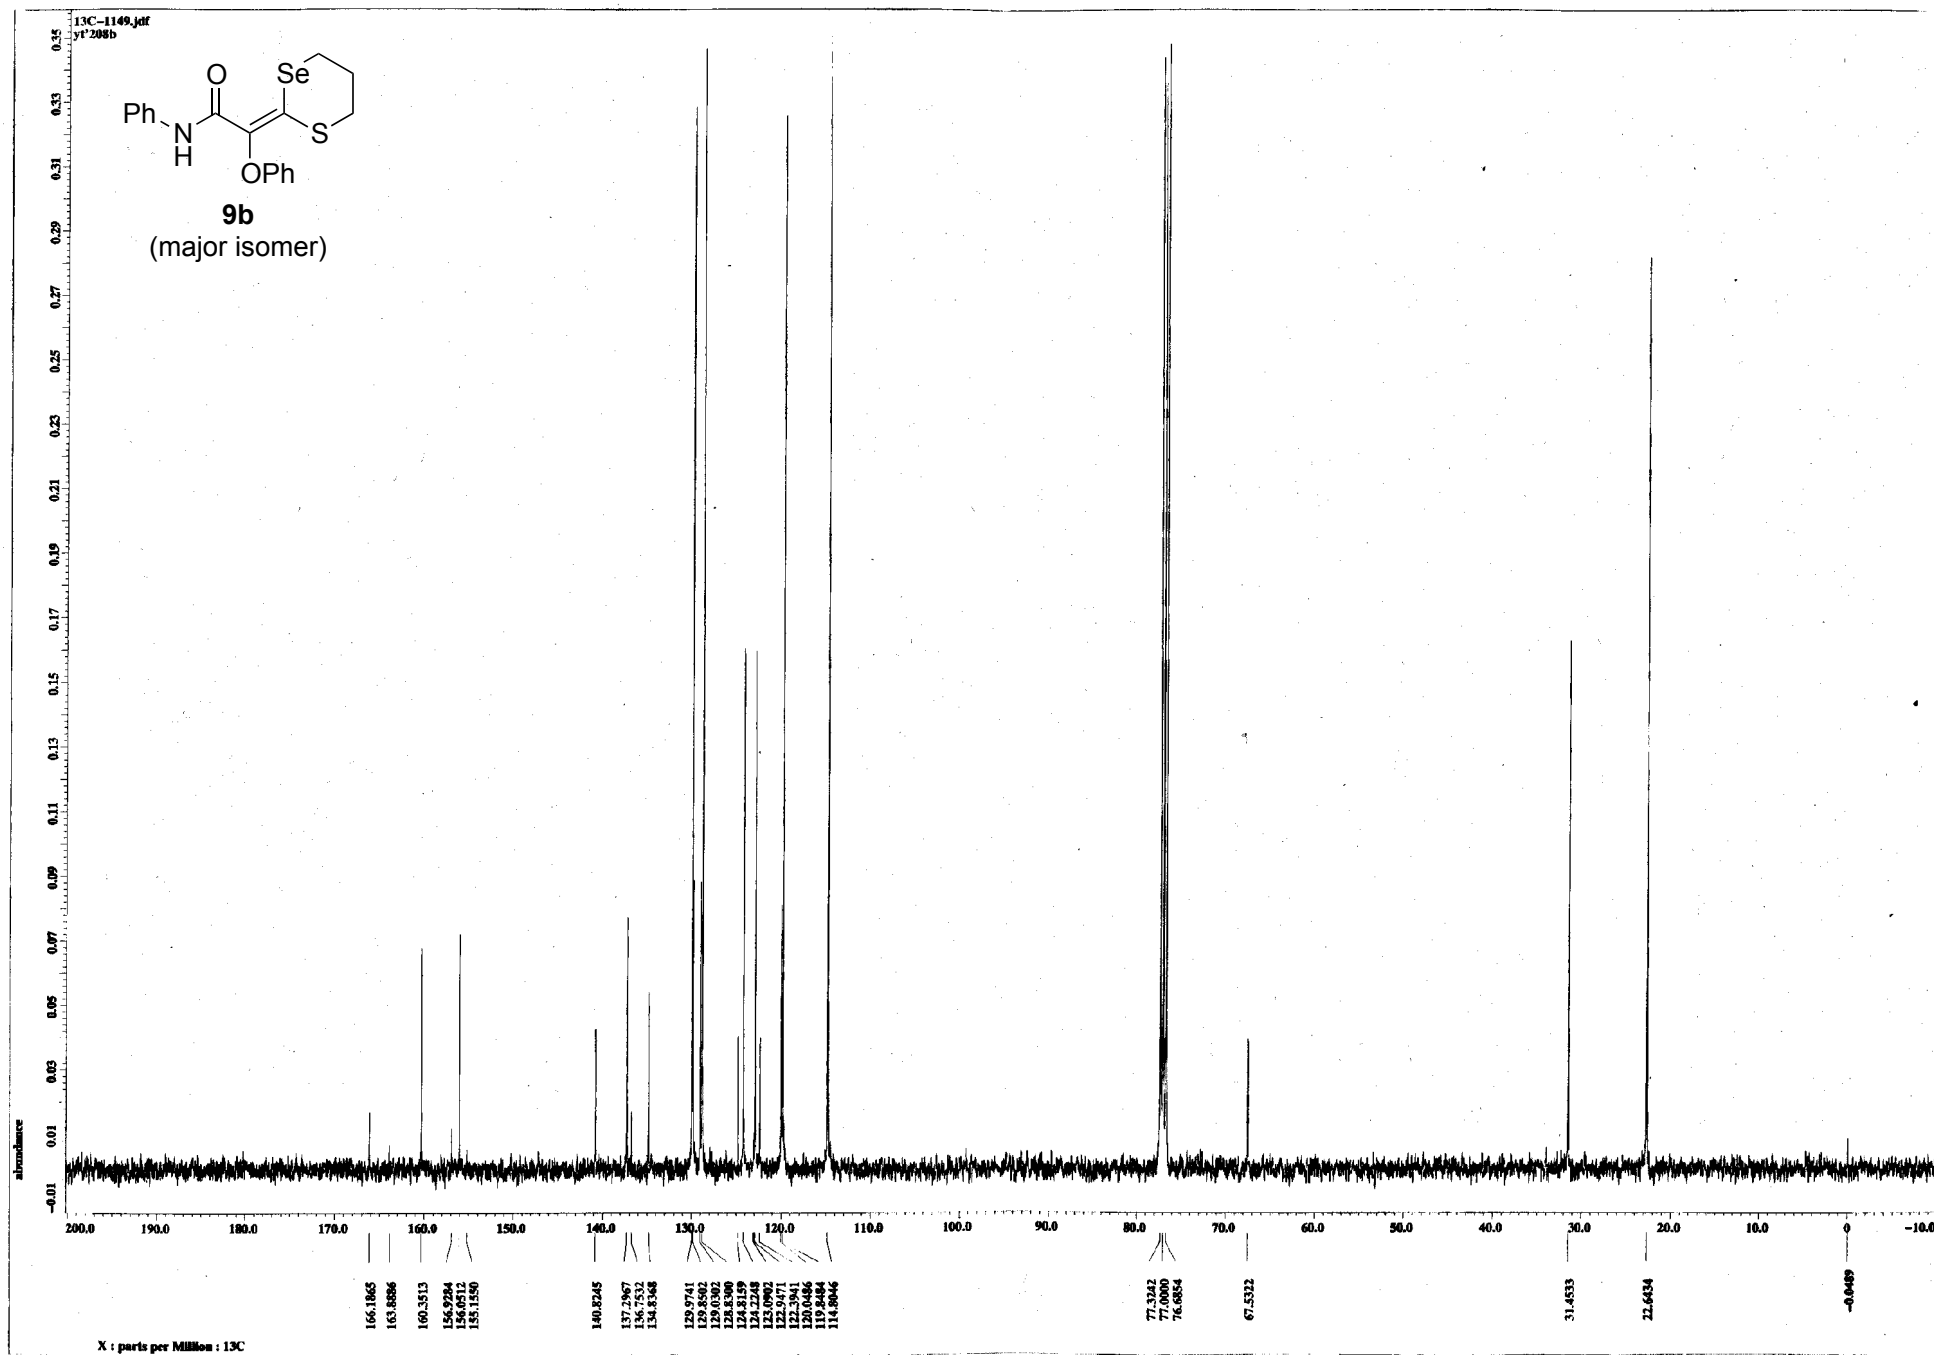



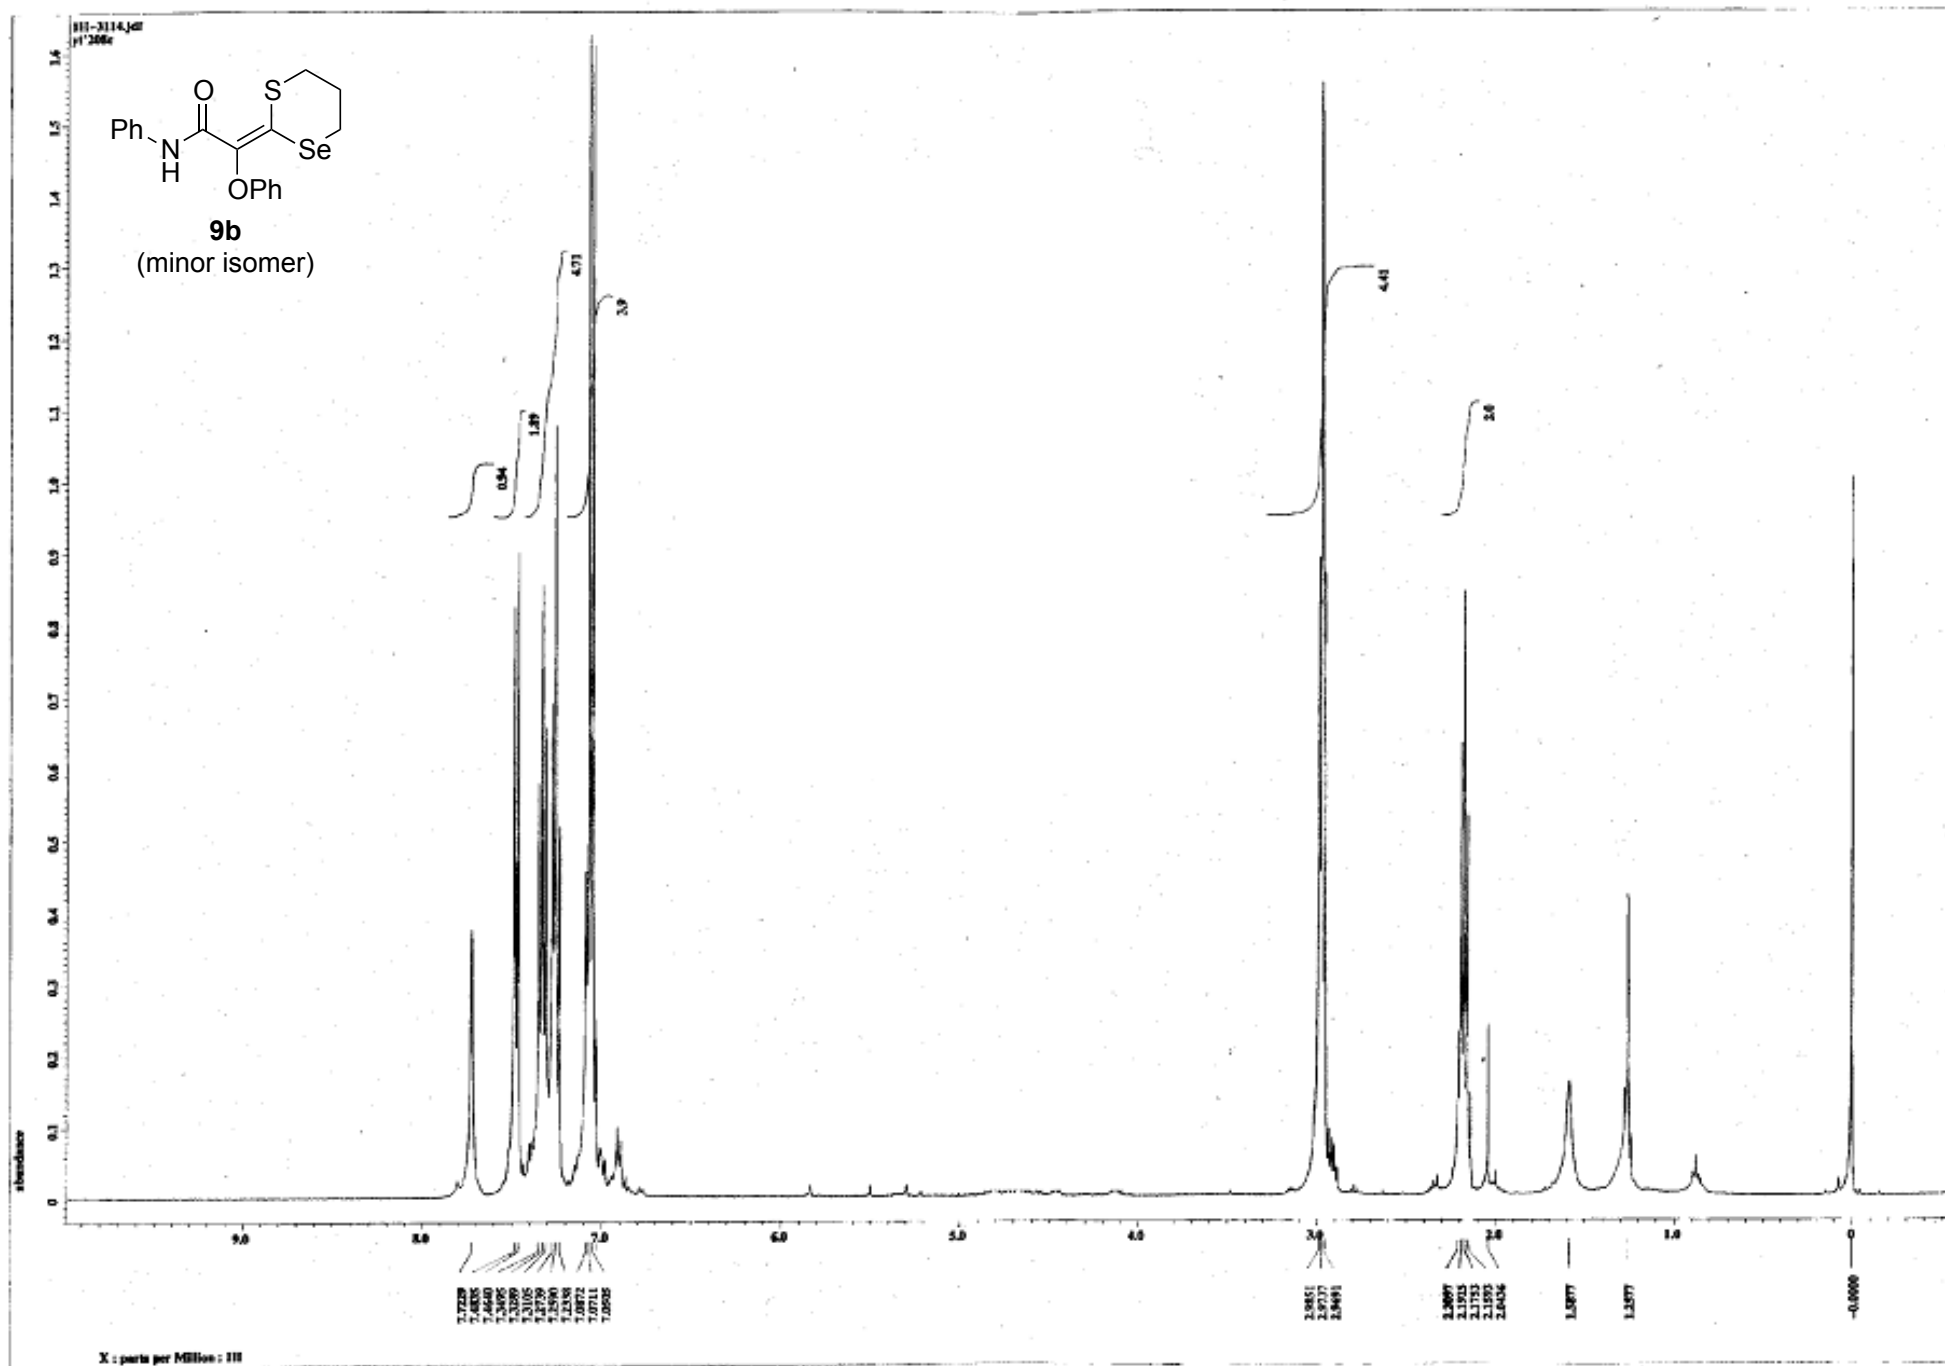

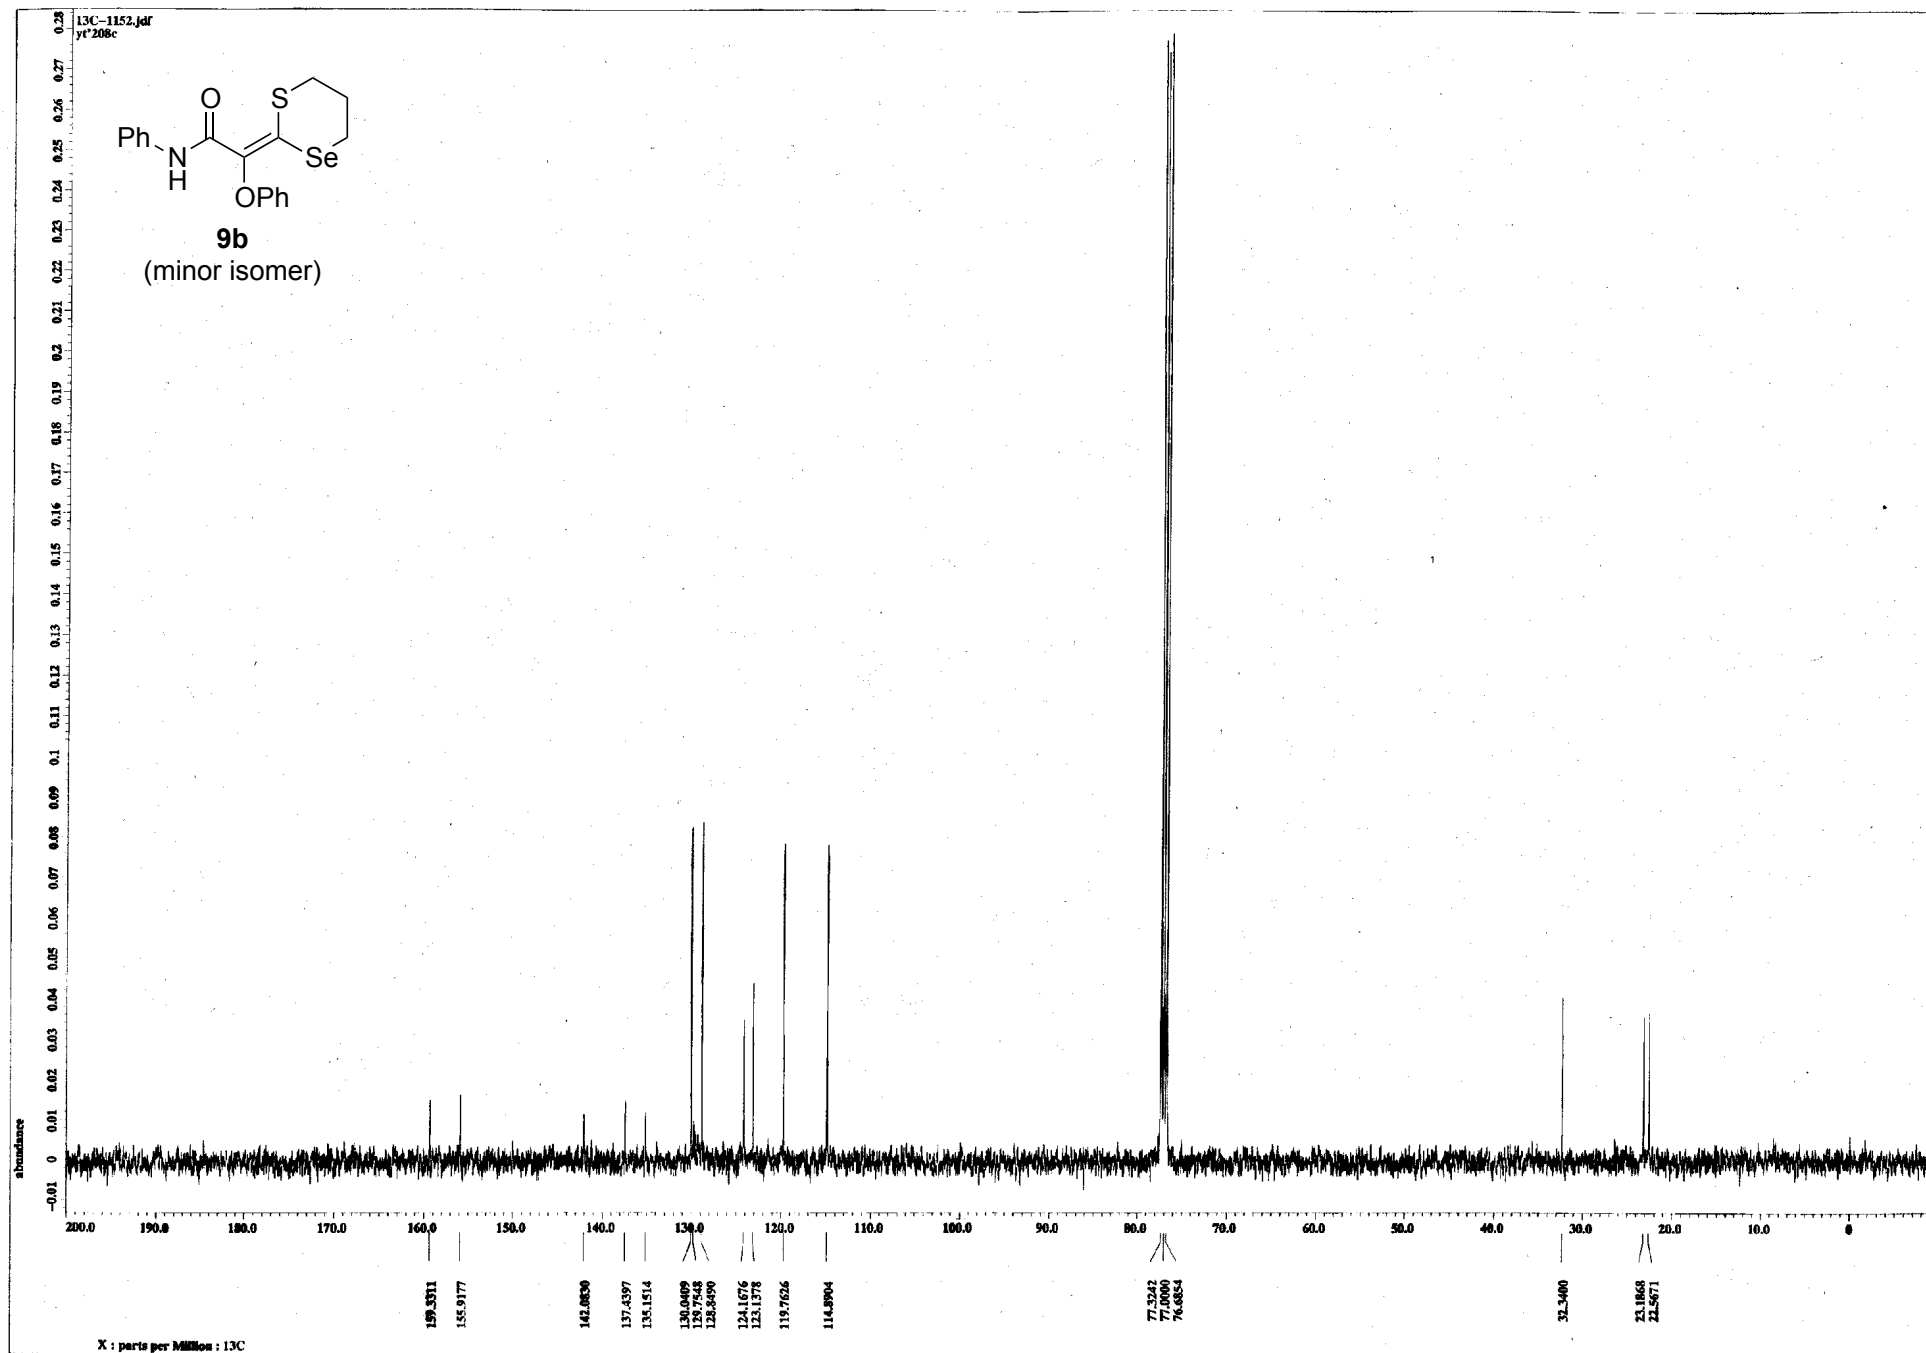

Supplement: c3ob00073g.pdf [file c3ob00073g.pdf]
